# Supplementary material for: The Mycobacterium ulcerans toxin mycolactone causes destructive Sec61-dependent loss of the endothelial glycocalyx and vessel basement membrane to drive skin necrosis
Source: eLife journal article supplement (doi:10.7554/elife.86931), 2023-05-15
Supplement: fig4-data2 [file elife-86931-fig4-data2-v1.zip]

dHS

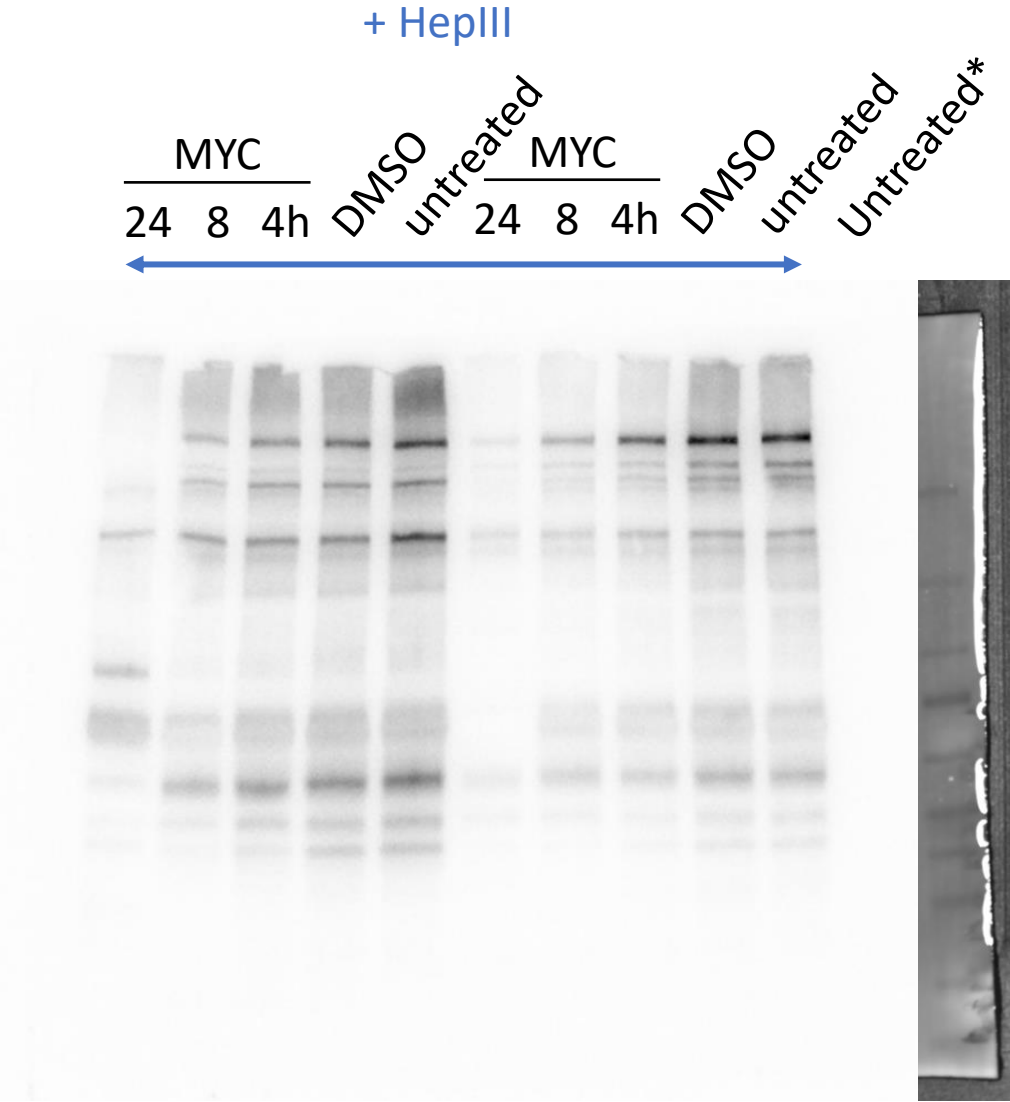

2 Reps

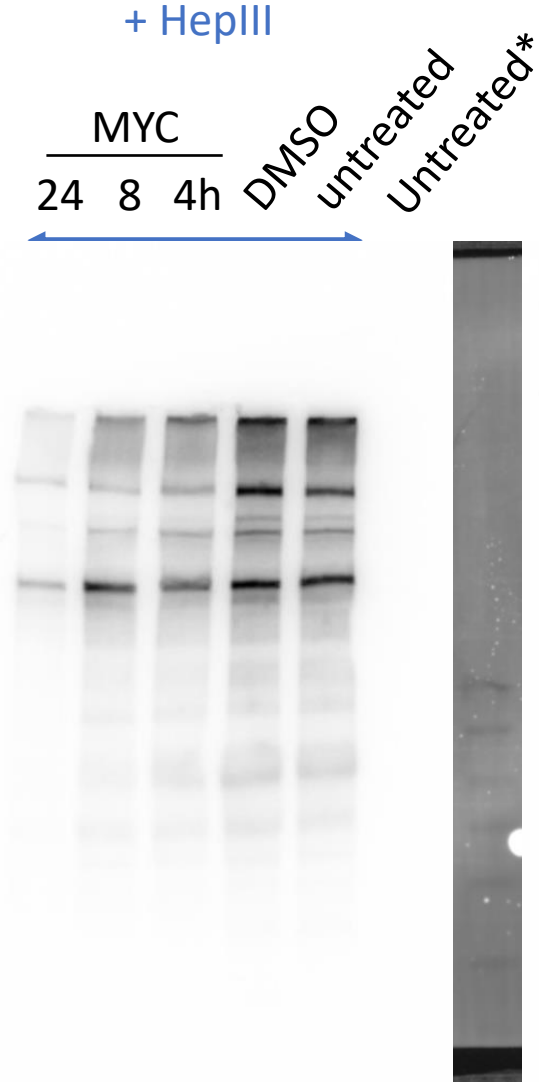

Samples from  
unrelated  
experiment

3rd Rep

\* = control sample untreated with Heparinase III (HepIII): antibody control

GAPDH

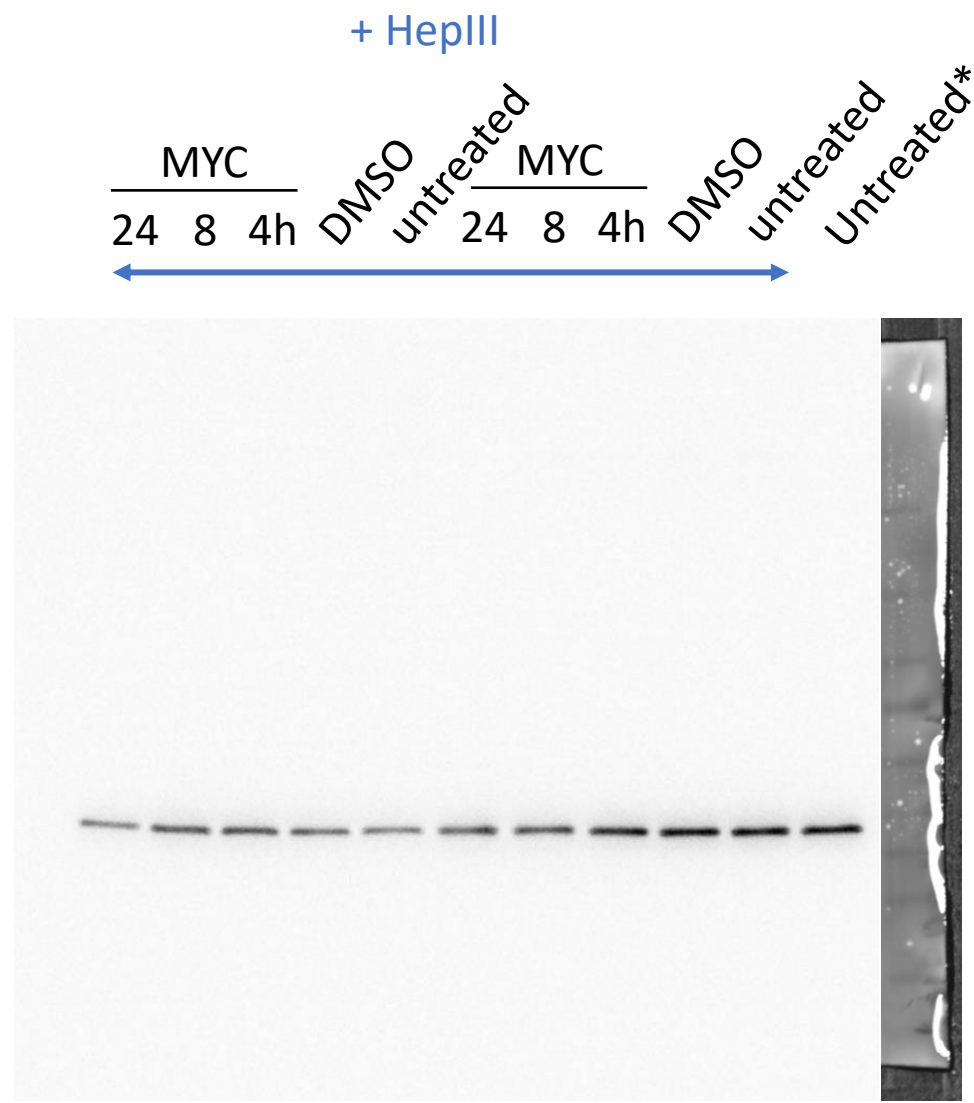

2 Reps

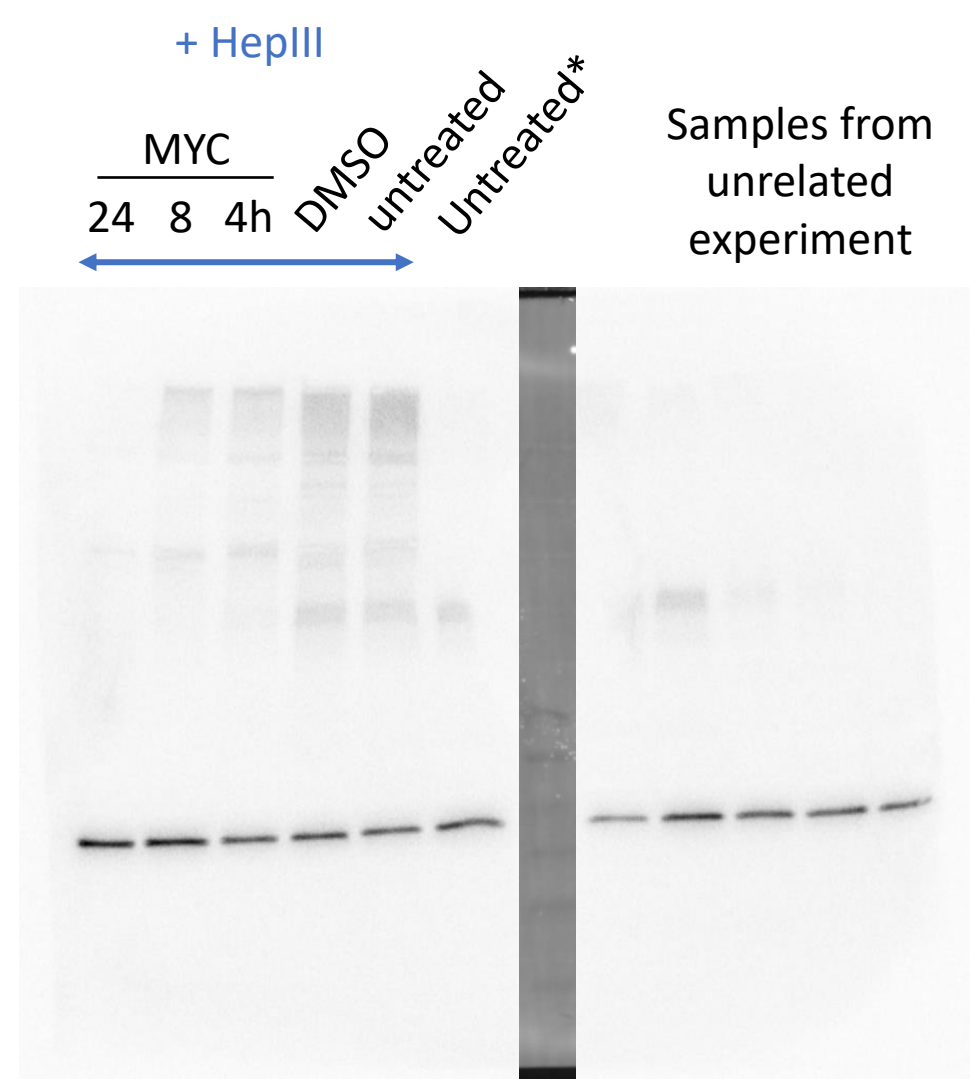

3rd Rep

\* = control sample untreated with Heparinase III (HepIII): antibody control
