# Supplementary material for: The Mycobacterium ulcerans toxin mycolactone causes destructive Sec61-dependent loss of the endothelial glycocalyx and vessel basement membrane to drive skin necrosis
Source: eLife. 2025 Feb 6;12:RP86931. doi: 10.7554/eLife.86931 (PMC11801798; doi:10.7554/eLife.86931)
Supplement: Figure 1—source data 1. — Data were generated as described in the respective legend of Figure 1. [file elife-86931-fig1-data1.xlsx]

## Sheet: Figure 1B
Figure 1B		Phenotypes (% of control)
		rounded				elongated				normal
		Rep 1	Rep 2	Rep 3	p=	Rep 1	Rep 2	Rep 3	p=	Rep 1	Rep 2	Rep 3	p=
	DMSO 0h	3	2.5	3.6		0	3.4	2.2		97	94.1	94.2
	DMSO 24h	3	3.1	3.6	0.8343	4.4	8.2	4.6	0.0959	92.6	88.7	91.8	0.1199
	DMSO 48h	9.5	2	4.7	0.7839	1.5	6.4	3.4	0.2031	89	91.7	91.8	0.3781
	Myco 0h	4.1	4.3	3.2	0.7114	2.7	3.5	3.8	0.4672	93.2	92.2	92.9	0.2386
	Myco 8h	3.6	3	2.2	0.9998	6.6	14.8	19.4	0.1669	89.8	82.2	78.3	0.1185
	Myco 16h	3.9	4.9	4	0.4368	38.6	40.1	38.3	0.0012	57.5	54.9	57.7	0.0018
	Myco 24h	12.2	5.1	11.9	0.2212	46.8	51.3	56.8	0.0067	41	43.6	31.3	0.0112
	Myco 48h	32.5	27.5	52.4	0.115	60.3	58.8	42.9	0.0349	7.3	13.7	4.8	0.0035

## Sheet: Figure 1C
Figure 1C		Length/width of individual cells
		Myco
	DMSO	16 h	24 h
	1.58875	5.09325	7.37284
	2.29094	10.232	7.97368
	5.68022	3.13706	4.07435
	1.63768	5.47656	5.17714
	2	5.85281	19.735
	1.27	10.8359	9.76282
	1.46914	1.84026	3.00341
	8.06164	4.85522	5.67246
	3.64746	2.623	4.24549
	3.74487	0.324082	5.39779
	4.77692	3.87138	7.01245
	4.45	3.91315	9.09938
	3.77114	5.09375	28.2135
	3.34571	3.4636	15.3675
	2.61434	8.25871	6.65975
	3.22973	3.37993	8.96
	3.0754	4.6129	10.7865
	2.0913	5.68828	6.89
	2.21053	3.03333	11.3603
	4.01059	3.05672	10.308
	2.45898	4.07353	6.6918
	1.3743	8.11574	6.00766
	2.05394	1.25153	4.53796
	4.31471	6.08765	0.769198
	1.9543	7.46977	10.677
	1.66381	4.52787	6.1864
	2.10551	2.87783	6.15625
	4.46137	1.63941	7.73414
	2.22523	1.999	11.5584
	1.5362	2.12348	5.98047
	1.03322	4.8853	19.3906
	2.97183	3.40167	6.95895
	6.27113	5.31921	8.875
	1.41856	3.66802	14.8542
	2.3535	3.41608	9.97872
	2.18605	1.42451	6.09426
	1.01231	4.71045	5.46584
	2.48701	7.06068	5.45208
	2.69524	5.2087	5.39231
	2.27953	4.90278	4.84231
	1.25584	3.73684	18.7602
	2.13839	3.73684	3.40777
	2.09091	5.70892	4.16692
	1.4283	2.93448	5.83475
	2.87152	4.10714	11.7143
	2.55876	5.16071	13.5563
	2.64706	8.14337	10.1799
	1.94259	7.84478	16.7843
	2.67663	4.63158	20.582
	1.45212	6.19553	17.5411
	1.65898	3.86532	25.7361
	2.65488	7.5873	14.4152
	2.84547	6.20588	11.5439
	2.76591	2.40762	12.1799
	3.19429	6.52921	8.67725
	2.3819	3.24381	3.79911
	1.35567	1.65102	2.95333
	2.23346	7.75	2.97321
	2.62376	4.28986	6.31535
	5.04049	7.76892	13.4844
	6.98771	11.7515	13.8281
	1.76752	9.3595	15.8241
	3.4803	11.7667	6.4798
	3.05714	9.315	4.45192
	1.32871	9.801	2.89568
	3.22518	11.2446	7.11268
	2.94485	14.86	4.605
	1.99351	7.1123	2.43678
	2.9771	8.79487	4.73099
	1.5343	8.115	10.6383
	1.23241	2.42578	4.06335
	2.17167	2.33333	2.71383
	2.87071	8.25763	4.38223
	3.5979	6.25287	10.6686
	1.91631	5.13826	15.3148
	2.43251	3.68712	5.22535
	1.96879	3.74174	3.25714
	4.07515	2.34019	1.71872
	2.0375	5.72222	14.525
	6.25544	6.92337	11.4972
	8.47511	3.62324	7.81818
	4.56429	5.15625	11.6063
	2.08333	2.03025	2.93639
	1.62344	8.08252	2.02318
	2.5364	2.52492	10.8607
	3.66431	4.20235	7.39
	2.11342	2.89964	16.4699
	2.54167	12.8324	9.6213
	3.0354	3.92674	5.56646
	3.69025	5.57275	14.6328
	1.2372	2.81502	27.0112
	1.40625	2.96882	21.3121
	4.23518	7.76786	6.11712
	2.75559	2.60148	9.55702
	2.11667	2.74059	2.41288
	1.76965	4.24571	2.07194
	2.791	5.07338	7.39615
	2.18929	3.33989	9.48045
	1.9196	4.97917	9.65347
	2.31073	3.88382	14.4762
	1.67008	6.11801
	2.31262	5.59302
	5.78077	6.78541
	1.26497	4.15678
	1.67831	4.05158
	6.32727
p=		<0.0001	<0.0001

## Sheet: Figure 1D
Figure 1D		Scratch area (% of control)
		DMSO			Myco
		Rep 1	Rep 2	Rep 3	Rep 1	Rep 2	Rep 3	p=
	0 h	98.0567	106.259	95.6839	97.4682	107.271	95.2611	>0.999
	16 h	39.4995	24.6405	14.4702	58.3933	41.2297	27.716	0.4273
	24 h	13.6393	3.72343	1.4058	46.886	36.9292	24.6195	0.0354

## Sheet: Figure 1G
Figure 1G		Relative coverage (zenCELL Owl)
	h	Untreated			DMSO			ZIF-80			IpomF			Myco
		Rep 1	Rep 2	Rep 3	Rep 1	Rep 2	Rep 3	Rep 1	Rep 2	Rep 3	Rep 1	Rep 2	Rep 3	Rep 1	Rep 2	Rep 3
	0	1	1.02	1	1	1	1	1	1	1	1	1.01	1	1	1	1
	0.5	1			1			1		0.72	1		0.68	1
	1	1			1			1			1			1
	1.5	1.05			1.04			1.03			1.02			1.05
	2	1.08			1.09			1.04			1.04			1.03
	2.5	1.1			1.15			1.08			1.04			1.07
	3	1.13			1.12			1.09			1.07			1.18
	3.5	1.11		1.24	1.16			1.08			1.05		1.05	1.2		0.83
	4	1.13		1.45	1.2		1.03	1.11		1.08	1.06		1.11	1.24		0.87
	4.5	1.15		1.47	1.2		1.04	1.16		1.09	1.06		1.12	1.27		0.87
	5	1.16	1.42	1.46	1.2	1.01	1.04	1.17	0.74	1.12	1.08	1.18	1.11	1.31	0.97	0.88
	5.5	1.16	1.43	1.49	1.22	1.22	1.07	1.19	1.12	1.12	1.13	1.26	1.09	1.32	1.02	0.89
	6	1.16	1.46	1.5	1.26	1.22	1.07	1.22	1.14	1.13	1.15	1.27	1.1	1.35	1.03	0.89
	6.5	1.15	1.47	1.54	1.26	1.24	1.08	1.26	1.15	1.13	1.15	1.27	1.1	1.35	1.03	0.92
	7	1.14	1.5	1.57	1.28	1.28	1.09	1.28	1.15	1.12	1.18	1.29	1.09	1.35	1.04	0.91
	7.5	1.17	1.49	1.57	1.3	1.27	1.09	1.31	1.16	1.13	1.21	1.29	1.1	1.36	1.06	0.92
	8	1.17	1.51	1.6	1.28	1.31	1.12	1.36	1.17	1.13	1.23	1.3	1.11	1.4	1.09	0.92
	8.5	1.16	1.52	1.62	1.28	1.34	1.11	1.4	1.21	1.14	1.22	1.3	1.1	1.4	1.11	0.92
	9	1.16	1.53	1.65	1.32	1.35	1.12	1.43	1.22	1.16	1.21	1.31	1.12	1.46	1.14	0.92
	9.5	1.17	1.56	1.7	1.35	1.35	1.12	1.4	1.25	1.18	1.22	1.34	1.15	1.46	1.16	0.95
	10	1.17	1.57	1.72	1.39	1.36	1.12	1.43	1.23	1.16	1.25	1.35	1.17	1.49	1.17	0.98
	10.5	1.15	1.57	1.74	1.39	1.38	1.11	1.43	1.24	1.18	1.28	1.36	1.18	1.47	1.2	1
	11	1.19	1.56	1.75	1.36	1.36	1.13	1.49	1.27	1.17	1.25	1.39	1.2	1.48	1.21	0.99
	11.5	1.25	1.58	1.73	1.41	1.36	1.12	1.48	1.28	1.17	1.29	1.39	1.22	1.53	1.22	0.98
	12	1.24	1.6	1.73	1.39	1.38	1.1	1.51	1.29	1.21	1.32	1.41	1.23	1.55	1.24	1
	12.5	1.23	1.58	1.73	1.4	1.4	1.09	1.57	1.32	1.19	1.35	1.41	1.25	1.56	1.23	0.99
	13	1.23	1.61	1.76	1.43	1.4	1.1	1.59	1.34	1.19	1.35	1.43	1.27	1.6	1.24	1.04
	13.5	1.24	1.62	1.83	1.47	1.42	1.1	1.59	1.32	1.19	1.36	1.45	1.27	1.59	1.25	1.04
	14	1.28	1.65	1.85	1.51	1.41	1.13	1.63	1.36	1.2	1.37	1.45	1.25	1.62	1.27	1.05
	14.5	1.32	1.64	1.87	1.55	1.45	1.15	1.64	1.35	1.21	1.39	1.45	1.24	1.63	1.27	1.05
	15	1.33	1.65	1.87	1.55	1.44	1.17	1.68	1.34	1.2	1.4	1.46	1.27	1.68	1.27	1.04
	15.5	1.33	1.66	1.86	1.58	1.45	1.19	1.72	1.35	1.2	1.43	1.46	1.27	1.71	1.3	1.06
	16	1.33	1.67	1.9	1.59	1.47	1.2	1.76	1.35	1.23	1.44	1.49	1.32	1.7	1.3	1.06
	16.5	1.34	1.69	1.93	1.57	1.48	1.2	1.77	1.36	1.22	1.42	1.51	1.33	1.72	1.3	1.09
	17	1.35	1.68	1.98	1.6	1.5	1.19	1.79	1.36	1.22	1.46	1.5	1.34	1.77	1.29	1.09
	17.5	1.34	1.68	1.95	1.67	1.49	1.2	1.8	1.37	1.22	1.45	1.51	1.32	1.81	1.29	1.1
	18	1.38	1.68	1.94	1.67	1.5	1.21	1.86	1.37	1.25	1.53	1.49	1.3	1.82	1.29	1.1
	18.5	1.41	1.68	1.94	1.69	1.51	1.2	1.87	1.37	1.28	1.53	1.48	1.33	1.89	1.31	1.1
	19	1.44	1.7	1.91	1.69	1.54	1.22	1.87	1.39	1.26	1.54	1.48	1.31	1.93	1.3	1.06
	19.5	1.45	1.7	1.95	1.74	1.55	1.23	1.93	1.4	1.24	1.56	1.48	1.31	1.93	1.3	1.1
	20	1.48	1.7	1.94	1.75	1.57	1.24	2	1.41	1.24	1.58	1.49	1.32	1.92	1.3	1.1
	20.5	1.48	1.7	1.93	1.8	1.57	1.22	1.99	1.44	1.23	1.62	1.5	1.31	1.99	1.3	1.11
	21	1.5	1.7	1.95	1.84	1.6	1.24	1.99	1.45	1.24	1.62	1.51	1.33	1.95	1.31	1.11
	21.5	1.51	1.69	1.95	1.84	1.61	1.25	2.02	1.45	1.27	1.63	1.51	1.36	1.93	1.32	1.13
	22	1.55	1.71	1.96	1.92	1.63	1.23	2.02	1.47	1.29	1.63	1.5	1.37	1.98	1.35	1.11
	22.5	1.55	1.72	1.99	1.93	1.65	1.25	1.99	1.48	1.26	1.62	1.51	1.4	1.96	1.37	1.11
	23	1.57	1.72	1.98	1.97	1.62	1.27	2.02	1.47	1.26	1.64	1.51	1.42	2	1.37	1.12
	23.5	1.61	1.73	2.01	1.99	1.64	1.27	2.03	1.48	1.27	1.63	1.51	1.39	2.02	1.36	1.13
	24	1.62	1.75	2.02	2.03	1.72	1.29	2.04	1.5	1.25	1.65	1.53	1.39	2.03	1.39	1.12
	24.5	1.61	1.79	2.01	2.01	1.76	1.29	2.06	1.52	1.25	1.68	1.56	1.4	2.03	1.4	1.13
	25	1.63	1.8	2.01	2.04	1.75	1.33	2.1	1.5	1.26	1.69	1.56	1.39	2.07	1.41	1.11
	25.5	1.61	1.8	2.03	2.06	1.76	1.31	2.1	1.48	1.27	1.7	1.55	1.4	2.03	1.42	1.13
	26	1.64	1.81	2.04	2.02	1.76	1.35	2.11	1.49	1.26	1.73	1.55	1.39	1.96	1.39	1.16
	26.5	1.65	1.8	2.05	2.06	1.77	1.36	2.05	1.5	1.28	1.76	1.53	1.39	1.93	1.38	1.15
	27	1.7	1.81	2.04	2.07	1.78	1.39	2.07	1.51	1.29	1.79	1.52	1.4	1.93	1.37	1.15
	27.5	1.7	1.8	2.05	2.09	1.78	1.4	2.04	1.51	1.31	1.82	1.51	1.38	1.95	1.35	1.14
	28	1.74	1.82	2.06	2.14	1.77	1.39	2.07	1.5	1.32	1.83	1.5	1.38	1.94	1.36	1.13
	28.5	1.74	1.82	2.03	2.16	1.79	1.39	2.1	1.5	1.32	1.86	1.51	1.37	1.91	1.37	1.13
	29	1.77	1.83	2.08	2.24	1.79	1.41	2.08	1.48	1.34	1.86	1.5	1.36	1.91	1.36	1.15
	29.5	1.78	1.83	2.05	2.26	1.78	1.41	2.06	1.49	1.31	1.89	1.51	1.4	1.96	1.35	1.13
	30	1.81	1.85	2.04	2.3	1.77	1.4	2.08	1.48	1.3	1.9	1.51	1.41	1.89	1.35	1.13
	30.5	1.86	1.85	2.04	2.29	1.77	1.42	2.05	1.48	1.33	1.89	1.49	1.4	1.88	1.37	1.13
	31	1.89	1.84	2.06	2.32	1.77	1.41	2.07	1.47	1.32	1.86	1.48	1.39	1.89	1.38	1.14
	31.5	1.91	1.84	2.04	2.36	1.8	1.42	2.09	1.48	1.29	1.89	1.44	1.42	1.92	1.36	1.12
	32	1.93	1.85	2.05	2.4	1.82	1.44	2.08	1.46	1.29	1.89	1.45	1.47	1.93	1.34	1.11
	32.5	1.92	1.86	2.07	2.4	1.81	1.46	2.09	1.44	1.29	1.89	1.45	1.5	1.92	1.33	1.14
	33	1.97	1.86	2.06	2.45	1.83	1.46	2.06	1.43	1.29	1.92	1.42	1.47	1.91	1.33	1.13
	33.5	1.97	1.86	2.08	2.46	1.85	1.47	2.07	1.4	1.29	1.93	1.43	1.43	1.86	1.32	1.11
	34	1.98	1.86	2.11	2.44	1.85	1.45	2.04	1.4	1.27	1.9	1.42	1.43	1.8	1.32	1.1
	34.5	1.97	1.86	2.13	2.46	1.85	1.46	2.01	1.39	1.28	1.91	1.42	1.42	1.83	1.32	1.12
	35	1.98	1.87	2.13	2.52	1.83	1.45	2.01	1.39	1.27	1.91	1.41	1.4	1.8	1.31	1.08
	35.5	2	1.88	2.19	2.53	1.85	1.47	2.02	1.4	1.27	1.89	1.4	1.37	1.78	1.33	1.07
	36	2.01	1.88	2.19	2.52	1.86	1.5	2	1.38	1.26	1.91	1.4	1.33	1.76	1.32	1.08
	36.5	2.02	1.89	2.18	2.55	1.84	1.49	1.99	1.37	1.26	1.91	1.41	1.37	1.78	1.29	1.1
	37	2.03	1.89	2.19	2.58	1.84	1.49	1.99	1.36	1.29	1.89	1.4	1.37	1.82	1.28	1.11
	37.5	2.04	1.92	2.21	2.62	1.86	1.47	1.96	1.36	1.28	1.91	1.39	1.37	1.79	1.27	1.1
	38	2.05	1.91	2.21	2.64	1.85	1.49	1.96	1.36	1.28	1.93	1.39	1.36	1.76	1.29	1.09
	38.5	2.09	1.9	2.22	2.66	1.86	1.5	1.94	1.36	1.27	1.9	1.35	1.35	1.73	1.28	1.1
	39	2.11	1.89	2.26	2.69	1.87	1.52	1.91	1.36	1.26	1.91	1.35	1.34	1.71	1.28	1.05
	39.5	2.12	1.9	2.21	2.68	1.86	1.53	1.83	1.3	1.27	1.89	1.35	1.34	1.72	1.27	1.08
	40	2.14	1.91	2.21	2.69	1.87	1.55	1.85	1.27	1.29	1.9	1.31	1.34	1.7	1.29	1.06
	40.5	2.15	1.91	2.24	2.69	1.91	1.55	1.86	1.24	1.27	1.92	1.31	1.37	1.68	1.29	1.05
	41	2.18	1.92	2.24	2.7	1.89	1.54	1.84	1.23	1.28	1.93	1.29	1.34	1.66	1.29	1.04
	41.5	2.2	1.92	2.24	2.7	1.89	1.54	1.87	1.22	1.24	1.89	1.3	1.3	1.62	1.29	1.04
	42	2.22	1.92	2.26	2.74	1.87	1.53	1.83	1.23	1.2	1.87	1.3	1.33	1.59	1.29	1.06
	42.5	2.23	1.91	2.26	2.76	1.89	1.53	1.85	1.22	1.2	1.84	1.29	1.29	1.61	1.25	1.07
	43	2.25	1.92	2.25	2.79	1.9	1.55	1.8	1.24	1.18	1.84	1.29	1.29	1.57	1.25	1.06
	43.5	2.27	1.92	2.25	2.79	1.91	1.56	1.81	1.23	1.16	1.81	1.28	1.31	1.57	1.24	1.07
	44	2.29	1.93	2.24	2.77	1.91	1.57	1.81	1.23	1.18	1.78	1.26	1.27	1.56	1.23	1.07
	44.5	2.31	1.92	2.26	2.76	1.91	1.58	1.79	1.18	1.17	1.78	1.25	1.25	1.54	1.24	1.06
	45	2.34	1.91	2.27	2.77	1.94	1.55	1.73	1.16	1.15	1.81	1.25	1.25	1.55	1.24	1.05
	45.5	2.34	1.91	2.27	2.77	1.93	1.56	1.78	1.16	1.13	1.75	1.23	1.25	1.5	1.22	1.04
	46	2.37	1.94	2.25	2.82	1.93	1.54	1.77	1.18	1.14	1.74	1.22	1.25	1.53	1.24	1.06
	46.5	2.38	1.92	2.28	2.8	1.94	1.52	1.72	1.17	1.13	1.67	1.23	1.26	1.53	1.24	1.04
	47	2.43	1.93	2.3	2.83	1.94	1.52	1.71	1.16	1.14	1.64	1.24	1.25	1.54	1.21	1
	47.5	2.4	1.93	2.29	2.82	1.95	1.56	1.74	1.11	1.11	1.63	1.24	1.26	1.51	1.21	1.01
	48	2.43	1.94	2.3	2.85	1.96	1.55	1.72	1.11	1.09	1.65	1.24	1.28	1.51	1.19	1.02

## Sheet: Figure 1H
Figure 1H		Detached cells % (zenCELL Owl)
	h	Untreated			DMSO			ZIF-80			IpomF			Myco
		Rep 1	Rep 2	Rep 3	Rep 1	Rep 2	Rep 3	Rep 1	Rep 2	Rep 3	Rep 1	Rep 2	Rep 3	Rep 1	Rep 2	Rep 3
	0		3.45	4.3		3.74	3		2.61	3.9		4.46	4.7		5.13	4.6
	0.5
	1	4.46			1.72			3.57			2.3			1.39
	1.5	4.59			3.92			4.26			2.25			2.78
	2	7.02			1.79			6.17			2.86			5.63
	2.5	7.77			5.08			5.95			2.94			0
	3	9.01			1.79			8.6			2.08			0
	3.5	5.26		8.7	7.27			6.25		8.6	3.26		6.7	2.53		13.9
	4	5.31		5.7	3.08			4.71		8.5	2.13		7.6	1.23		13.6
	4.5	5.22		4.7	1.43			7.37		11.8	4.55		8.6	1.9		8.4
	5	6.14	3.62	6.4	1.56	10.09	8.5	6.93	7.95	12.6	5.5	2.89	5.3	0.99	4.08	11.3
	5.5	6.42	4.31	3.7	3.39	8.27	9.3	6.67	6.35	12.6	4.31	4.71	9.6	6.59	7.55	10.7
	6	7.34	4.37	8	5.71	9.09	5	4.72	5.58	7	4.1	3.75	9.2	1.06	5.49	11.3
	6.5	7.5	4.05	4.5	3.77	11.11	8.8	7.83	5.56	8.3	3.64	3.86	6.9	5.88	3.61	10.2
	7	5.13	4.03	9.6	3.17	10.6	5.9	5.79	6.32	7.6	3.33	3.8	12.1	3.54	6.75	14.9
	7.5	5.26	4.42	6.1	3.95	7.14	9.1	5.5	4.12	7.1	3.1	3.83	11.1	5.56	7.56	16.9
	8	5.26	4.04	6.2	2.94	8.92	6.8	5.08	7.18	5.8	7.3	4.41	9	5.56	7.06	14.6
	8.5	6.45	4.81	5.9	5	6.94	5.9	8.27	5.91	9.7	6.15	4.2	7.6	6.31	5.91	19.3
	9	6.14	5.26	6.3	4.17	6.54	4.5	8.22	10.7	8.7	7.03	5.5	4.7	4.35	4.97	11.2
	9.5	9.32	3.87	8	2.94	8.43	7	7.95	7.76	9.6	7.46	3.81	7	7.96	5.24	9.4
	10	7.09	3.99	7.7	1.33	4.88	6.4	7.94	4.39	12.1	6.72	5.12	8.3	8.8	5.15	12.1
	10.5	7.27	4.32	5.8	3.85	5.99	7.3	7.69	10.5	7.8	7.25	4.98	9.9	4.03	5.64	13
	11	6.19	4.78	8.7	6.25	7.45	4.4	9.46	6.52	5.7	7.64	3	6.4	4.84	6.6	10.4
	11.5	5.6	4.17	6.5	5.97	4.32	8.7	10.07	7.47	4.9	6.67	3.15	10	2.61	5.91	13.7
	12	6.03	4.55	6.8	6.06	5.88	10.5	7.23	8.47	5.9	5.26	2.93	7.4	4.31	7.39	14.2
	12.5	4.72	2.97	5.7	2.82	7.1	9.6	5.81	6.4	10.4	6.77	2.3	5.7	5.43	2.45	10.6
	13	4.76	4.61	9	5.33	6.94	7.8	8.23	5.75	5.8	3.6	3.55	6	5.47	5.85	12
	13.5	4.51	4.63	7.1	2.7	8.11	10.2	7.64	7.14	7.5	6.29	2.84	6.2	2.33	3.24	11.7
	14	5.47	3.91	5.7	5.41	8.43	6.8	6.21	7.12	5.7	3.87	5.08	7	2.26	3.91	10.8
	14.5	4.1	4.5	6.2	2.38	6.49	7.8	6.37	7.29	7.5	5.26	2.53	9.8	1.54	2.63	12.7
	15	4.51	3.36	5	5.19	9.09	8.4	7.69	4.15	9.7	5.52	3.27	6.8	6.34	5.53	9.7
	15.5	4.23	3.75	4.4	3.85	10.47	4.8	6.59	4.98	13.9	5.3	2.28	7.4	4.17	2.9	10.8
	16	4.96	3.95	4.3	5.19	7.91	7.6	7.27	5.91	10.9	3.82	3.12	4.5	5.88	3.56	7.3
	16.5	5.04	3.56	6.1	4	9.79	4	5.14	6.04	10.7	3.18	2.18	5	7.03	5.83	8.3
	17	2.99	4.47	5	5.06	9.33	9.2	6.25	5.3	8	5.3	2.19	5.2	4.86	5.83	12.3
	17.5	4.93	5.65	5.3	2.08	6.52	7.9	7.23	7.22	6.7	7.01	2.82	7.6	5.13	7.39	8.5
	18	4.05	4.25	5.4	4.08	8.9	6	5.2	8.87	7.8	7.45	3.21	7.6	5.06	6.58	9.7
	18.5	3.14	4.55	4.2	3.13	6.76	7.9	6.84	5.62	6.9	7.78	2.93	6.5	5.56	2.98	7.2
	19	3.8	5.45	6.7	6.14	7.92	5.4	6.29	6.96	6.9	4.44	4.6	7.7	5.88	3.64	9.8
	19.5	4.24	3.07	4.2	6.96	8.24	8.1	7.11	5.91	8.7	3.03	3.1	8.8	4.76	5.56	7
	20	3.61	3.35	6.1	4.72	6.8	5.3	6.15	8.84	9.8	4.65	3.31	6.5	4.19	5.19	7
	20.5	2.38	4.33	5.6	4.96	5.05	8.3	9.28	7.9	9.8	3.49	3.79	5.9	6.43	5.38	10.9
	21	3.14	3.35	5.4	2.73	7.37	8	7.55	6.99	8.8	5.39	4.67	5.8	6.47	5.63	9.8
	21.5	2.84	4.95	6.4	4.07	6.19	5.8	6.05	10.24	8.2	6.59	4.38	8.2	7.45	5.08	6.8
	22	4.97	5.37	3.8	2.33	5.78	11.1	3.88	8.6	10.8	6.63	3.83	7.2	6.29	5.58	7.5
	22.5	4.95	3.93	3.5	3.88	5.08	7	7.32	9.4	11.7	7.26	4.97	5.1	7.79	5.88	10.3
	23	4.6	4.27	1.2	2.38	4.2	6	5.69	7.61	10.4	8.79	6.29	7.9	9.87	6.28	7.5
	23.5	3.8	4.03	1.8	3.97	5.42	6.1	6.6	9.93	11.2	6.38	4.78	6.6	5.33	5.93	7.5
	24	2.78	4.41	3.2	2.26	5.71	8.3	7.28	7.64	7.5	6.74	3.7	8.9	8.23	9.06	11.7
	24.5	3.28	3.64	1.1	2.88	6.05	4.8	8.29	7.46	11.4	6.04	3.77	7.3	8.33	8.11	8.5
	25	4	3.76	2.6	2.21	4.09	5.9	8.92	10	11.2	7.26	6.21	10.8	7.05	7.98	10.4
	25.5	4.97	3.31	2	2.13	3.49	8	10.04	10.31	10.4	7.18	6.14	6.7	6.71	5.44	7.6
	26	3.92	3.26	2.8	3.4	4.32	4.9	7.14	11.54	11.6	8.42	6.17	9.4	9.88	6.12	10.3
	26.5	3.26	2.96	3.2	2.26	4.51	9.1	8.21	10.74	11.8	7.92	5	9.6	10.49	8.05	7.5
	27	2.83	3.07	2.8	2.63	6.2	6.9	8.41	10.56	12.8	8.42	6.85	9.6	9.87	7.41	9.2
	27.5	2	3.66	2.6	4.79	5.24	8.4	12.2	11.03	12.7	6.15	6.56	11.4	7.41	9.05	10.2
	28	2.53	2.25	3.8	2.67	4.55	7.1	12.27	11.85	12.8	8	7.96	9.4	15.89	10.69	11.1
	28.5	2.71	2.12	2.9	2.53	3.86	4.4	14.16	10.78	10.6	8.57	8.68	11.5	11.88	7.47	8.3
	29	4.63	2.45	2.7	3.16	4.12	6.4	14.22	10.17	13.7	7.88	8	9.2	14.12	9.24	13.5
	29.5	2.73	4.46	2.2	4.27	3.38	7	12.79	13.46	15.7	9.09	6.56	11	16.97	10.19	7.4
	30	2.59	4.29	3.4	3.45	3.47	4.4	14.29	11.45	11.1	10.76	7.48	11.3	21.01	12.19	9.4
	30.5	2.98	3.98	4	2.41	4.09	4.9	17.24	11.37	11.1	9.13	11	13.1	15.85	13.45	11.1
	31	2.94	2.62	2.2	2.82	3.37	6	19.13	12.78	12.9	10.73	11.58	12.4	19.32	16.2	13
	31.5	2.81	2.79	3.9	1.63	3.16	8.5	15.95	16.9	15.4	11.52	15.43	13.7	15.7	12.55	12.7
	32	2.38	1.85	3.9	2.69	4.14	6.3	17.14	13.38	13.8	12.5	11.48	9.5	18.9	13.94	14.5
	32.5	3.15	2.08	3.2	3.35	5.38	5.6	15.57	14.8	17.5	14.29	13.07	11.1	19.39	15.02	10.7
	33	2.87	1.33	2.8	2.62	4.78	6.9	21.4	16.88	16.4	13.87	14.71	9.6	17.65	12.14	13.1
	33.5	3.77	2.58	2.6	3.59	3.2	6.3	19.01	20.2	12.7	12.78	16.61	13.6	21.59	14.69	7.3
	34	2.95	2.7	3	2.06	2.41	5.6	19.76	20.45	16.5	13.12	16.72	11.7	21.14	16.72	11.6
	34.5	2.43	2.33	1	2.39	4.66	4.9	23.32	20	17	11.59	17.87	11.5	20.93	20	14.3
	35	3.52	2.29	1.5	4.63	4.24	4.7	20.66	21.09	17	12.56	16.83	15.5	24.58	20.07	11.6
	35.5	3.07	3.26	3.3	3.74	5.26	5.4	22.09	19.22	18.8	12.71	19.12	13.5	24.56	23.43	12.1
	36	4.23	3.44	3.3	3.17	5.43	6.9	19.92	25.84	15.2	14.78	20.61	14.1	20.11	20.61	13.8
	36.5	3.92	2.27	2.4	1.98	3.93	4.4	22.59	23.25	19.5	15.53	19	14	24.31	24.01	11.2
	37	3.8	2.87	2.9	1.42	4.71	6.1	22.83	21.38	15.1	16.81	19.38	16.4	18.78	26.37	12.4
	37.5	3.52	2.88	3.1	2.18	4.47	8.2	23.24	24.13	18.6	16.44	20.88	15.2	26.4	28.11	15.6
	38	2.73	3.1	2.2	2.25	4.69	5	27.31	23.44	18.7	18.14	15.64	14.4	30.29	26.95	16.8
	38.5	3.33	4.04	1.4	3.67	4.45	5.6	23.53	24.42	19.7	20.18	19.55	15.1	29.89	24.91	22.5
	39	3.46	4.43	2.3	2.63	4.9	5.2	26.05	25.77	21.7	21.1	18.67	14.8	29.03	24.73	19
	39.5	4.53	4.44	1.8	1.79	3.83	4.6	28.63	26	20.4	18	22.12	14.1	32.95	27.18	21.6
	40	5.34	2.59	2.3	2.2	3.46	3.5	22.87	29.97	23.8	21.29	21.5	16.4	31.67	27.55	20.9
	40.5	3.36	3.62	3	0.94	2.59	5.7	20	27.05	18.7	20.99	25.48	18.1	31.05	25.61	21.4
	41	4.01	3.74	4.4	1.34	2.91	6	29.96	28.23	19.8	21.31	24.54	17.7	33.16	29.77	20.8
	41.5	3.04	3.93	5	1.4	3.87	6.7	25.21	28.72	21.6	24	27.21	17.9	38.15	26.26	22.3
	42	3.47	4.99	3.8	4.29	4.67	5.2	23.31	26.15	24.9	23.75	29.91	19.7	37.08	29.43	21.7
	42.5	2.61	4.65	2.5	1.75	3.11	8.1	26.67	26.19	25.6	23.81	30.15	19	38.16	31.33	20.6
	43	1.68	4.94	4.1	3.18	5.32	7.3	27.88	28.08	26.2	22.13	26.33	19.1	35.85	30.43	21.2
	43.5	1.99	4.27	4	3.33	4.58	6	28.51	28.23	29.6	20.55	26.3	18.6	32.48	26.59	24
	44	2.32	3.78	3.2	2.88	5.3	7.5	25.81	30.79	28.2	20.95	25.16	17.3	36.47	30.18	20.2
	44.5	1.38	3.26	3.7	3.7	5.86	5.7	27.11	30.9	28.6	21.46	28.71	18.9	36.02	31.65	23.4
	45	1.31	4.48	4.5	4.07	5.56	5.2	23.98	30.66	29.3	22.58	32.04	19.8	40.37	32.07	20.8
	45.5	1.53	5.07	3.3	5.91	5.35	3.1	30.94	30.45	24.1	23.97	31.67	22.1	39.62	35.35	28.3
	46	3.19	4.39	2.5	3.13	4.53	4.3	28	32.08	26.9	29.29	29.28	20.3	42.51	34.38	29
	46.5	2.57	5.29	4.5	4.12	4.01	6.8	27.36	32.59	23.9	30.9	34.95	21.2	42.95	32.13	26
	47	1.58	5.2	5.6	4.63	5.83	4.2	27.88	32.8	24	22.83	34.25	23.9	40.34	37.45	27.5
	47.5	2.21	6.05	3.5	5.6	5.79	5.1	29.87	35.74	24.3	26.03	33.88	24.9	45.57	35.38	30
	48	3.28	4.24	3.9	4.12	5.81	5	30.77	34.47	24.1	27.15	31.05	22.4	43.86	37.5	22.3

## Sheet: Figure 1J
Figure 1J		Phenotypes (% of control)
		normal				elongated				rounded
		Rep 1	Rep 2	Rep 3	p=	Rep 1	Rep 2	Rep 3	p=	Rep 1	Rep 2	Rep 3	p=
	STATIC	89.4737	89.5522	78.0822	0.163	5.20231	7.46269	13.6986	0.1059	5.20231	2.98508	8.21918	0.5901
	SHEAR	59.0604	39.4737	59.4203		36.9128	57.8947	38.1643		4.02685	2.63158	2.41546
	DMSO 24h	53.6585	19.0141	28.5714	0.2854	41.4634	80.2817	70.7792	0.3102	4.87805	0.704225	0.649351	0.7593
	DMSO 48h	47.7778	19.8606	34.1954	0.1049	48.3333	78.3972	65.2299	0.1177	3.88889	1.74216	0.574713	0.4213
	Myco 24h	43.5897	24.1228	35.6482	0.0549	36.7521	72.807	60.6482	0.443	19.6581	3.07017	3.7037	0.7039
	Myco 48h	23.1579	8.54701	22.973	0.0063	33.6842	39.3162	43.2432	0.8694	43.1579	52.1367	33.7838	0.0408

## Sheet: Figure 1K
Figure 1K		Length/width of individual cells
	STATIC	SHEAR	DMSO 24 h	Myco 24 h	DMSO 48 h	Myco 48 h
	1.37634	1.79821	1.01821	1.53323	2.24208	2.62289
	1.40746	2.12089	2.2676	1.56352	2.29177	2.64369
	1.44119	2.13469	2.61081	1.75285	2.50754	2.78437
	1.48901	2.24857	2.79511	2.18655	2.86114	2.80123
	1.50225	2.4159	2.99086	2.56818	2.90698	3.00767
	1.5095	2.48045	3.06967	2.58503	2.92029	3.1237
	1.65748	2.49412	3.27479	2.75887	2.9833	3.34464
	1.66579	2.55413	3.35675	2.76373	3.04144	3.3487
	1.78762	2.76759	3.3827	3.06066	3.09191	3.36219
	1.80465	2.7803	3.42815	3.06333	3.14843	3.49511
	1.8052	2.87481	3.67058	3.09059	3.17193	3.66367
	1.81653	2.90111	3.68359	3.14596	3.30602	3.75855
	1.81957	2.92292	3.70131	3.2295	3.32311	3.7951
	1.82478	2.97432	3.70451	3.40604	3.37363	3.81968
	1.85637	3.00612	3.75706	3.44625	3.3879	3.97441
	1.92223	3.0066	3.7671	3.52605	3.39312	3.9792
	1.93724	3.03033	3.882	3.55827	3.43608	3.9937
	1.93773	3.12808	3.89542	3.70324	3.48364	4.04529
	1.93912	3.15659	3.95536	3.73195	3.51037	4.07688
	1.96743	3.25005	4.02957	3.7665	3.58001	4.11206
	1.98774	3.41135	4.04673	3.81841	3.65836	4.14302
	1.99469	3.4557	4.12442	3.8341	3.66017	4.29808
	2.01914	3.59661	4.18162	3.8664	3.74312	4.46401
	2.04296	3.65619	4.18592	3.87231	3.80686	4.58879
	2.09338	3.66586	4.19071	3.88156	3.87364	4.60865
	2.11707	3.70024	4.19856	3.8989	3.88287	4.64286
	2.12543	3.72531	4.223	3.91113	3.89607	4.67651
	2.17013	3.72856	4.226	3.95207	3.98196	4.86902
	2.17084	3.75816	4.24686	3.97053	4.03324	4.92723
	2.17634	3.79127	4.26613	3.97664	4.10356	4.93428
	2.18265	3.81529	4.41422	4.17165	4.111	5.14041
	2.29222	3.89444	4.42331	4.34803	4.12467	5.28489
	2.29878	3.89475	4.56487	4.39756	4.14026	5.34189
	2.30425	4.00879	4.56649	4.40976	4.14997	5.54173
	2.3099	4.00881	4.56713	4.43979	4.24853	5.65163
	2.4308	4.04929	4.58573	4.44628	4.28016	5.68723
	2.47241	4.09193	4.60071	4.46947	4.29777	5.72964
	2.47498	4.09979	4.725	4.489	4.30264	5.84093
	2.51282	4.10177	4.73267	4.50578	4.33029	5.84479
	2.51348	4.11461	4.73598	4.52146	4.34111	5.87065
	2.51721	4.15815	4.74064	4.59925	4.39569	5.89638
	2.54255	4.1607	4.75722	4.67888	4.42668	5.94526
	2.55003	4.17825	4.79728	4.68229	4.44088	6.06301
	2.55146	4.17938	4.8181	4.79241	4.44638	6.08266
	2.5614	4.20989	4.83076	4.82797	4.46401	6.11519
	2.57735	4.26705	4.84447	4.85576	4.47043	6.14808
	2.57781	4.27449	4.84809	4.85778	4.57758	6.19218
	2.57813	4.30137	4.84925	4.87912	4.58366	6.39329
	2.58591	4.3282	4.85164	4.89069	4.61084	6.40467
	2.58725	4.34734	4.85828	4.91716	4.64345	6.41817
	2.59485	4.35165	4.9075	4.92745	4.66261	6.5359
	2.64018	4.38016	4.90817	4.93016	4.67912	6.55266
	2.6972	4.38688	4.94974	4.93802	4.68895	6.57362
	2.70577	4.45295	4.96732	4.94102	4.70613	6.59629
	2.71245	4.45721	5.02112	4.95735	4.73551	6.69144
	2.74353	4.4783	5.08649	5.00802	4.96529	6.69422
	2.76061	4.48296	5.09176	5.06844	4.98289	6.77766
	2.77208	4.48471	5.10926	5.10281	5.01733	6.79131
	2.78896	4.53822	5.11487	5.1913	5.03224	6.82462
	2.83423	4.55248	5.17374	5.27401	5.03583	6.87852
	2.83589	4.65718	5.20308	5.28661	5.04443	6.97231
	2.84291	4.66062	5.21514	5.28903	5.0488	6.98984
	2.90832	4.67026	5.25988	5.30228	5.0606	7.33122
	2.91543	4.70775	5.31879	5.32782	5.122	7.47019
	2.924	4.74451	5.33062	5.35135	5.18479	7.49327
	2.96249	4.80675	5.3343	5.37363	5.21531	7.57564
	3.00079	4.80776	5.36844	5.44348	5.21777	7.62002
	3.03517	4.8138	5.38218	5.45896	5.23468	7.77613
	3.05762	4.82244	5.39774	5.51185	5.2412	7.85868
	3.06958	4.83098	5.44064	5.56887	5.26395	7.91446
	3.07151	4.83697	5.44365	5.61407	5.27355	7.95929
	3.09333	4.84685	5.45786	5.68318	5.29794	7.98118
	3.19058	4.90158	5.48104	5.72667	5.29794	8.12763
	3.20521	4.91975	5.48253	5.76401	5.30621	8.16454
	3.21704	4.95415	5.49481	5.87439	5.32449	8.17382
	3.23	5.03933	5.49981	5.89698	5.35401	8.17499
	3.24739	5.05204	5.52731	5.90183	5.35519	8.30399
	3.26242	5.06145	5.53245	5.91044	5.38768	8.46544
	3.28496	5.11606	5.54481	5.92907	5.46465	8.46857
	3.37282	5.13183	5.54587	6.0005	5.48151	8.47018
	3.40639	5.13813	5.55468	6.03209	5.5095	8.47752
	3.46674	5.13991	5.61497	6.08708	5.53193	8.50533
	3.48979	5.15705	5.62889	6.11035	5.53832	8.53643
	3.50727	5.16063	5.67508	6.12497	5.55316	8.59719
	3.51847	5.17945	5.68528	6.15496	5.56605	8.62996
	3.57456	5.3288	5.6999	6.18821	5.5731	9.16156
	3.57836	5.36545	5.71988	6.23361	5.63542	9.33912
	3.58828	5.38759	5.72542	6.25564	5.69153	9.35339
	3.60563	5.40495	5.77193	6.26343	5.6963	9.36872
	3.61699	5.42188	5.83724	6.28756	5.70215	9.41505
	3.62245	5.42631	5.83846	6.3117	5.75318	9.44624
	3.62706	5.42998	5.87871	6.31329	5.77088	9.45475
	3.64091	5.45243	5.89327	6.33804	5.8034	9.51384
	3.66907	5.52387	5.89577	6.3402	5.81708	9.59947
	3.6715	5.55941	5.90686	6.37438	5.82731	9.62528
	3.68719	5.5625	5.93251	6.41792	5.86634	9.63887
	3.74649	5.58285	5.94972	6.42375	5.8966	9.71858
	3.7662	5.60566	5.96343	6.54612	5.91191	9.75276
	3.78466	5.64117	5.9698	6.67065	5.9143	9.77081
	3.81912	5.70875	5.98199	6.67975	5.92576	9.78189
	3.82258	5.74005	5.9834	6.74223	5.93649	9.85143
	3.84347	5.75863	6	6.76041	5.94754	9.9461
	3.8957	5.76345	6.02182	6.8176	5.98945	9.97773
	3.92513	5.76423	6.02274	6.82465	5.992	10.0079
	3.94497	5.77157	6.05381	6.83237	5.99371	10.0249
	4.00695	5.80192	6.06879	6.93729	6	10.0937
	4.09177	5.8098	6.11415	6.98076	6.0156	10.1666
	4.19668	6.00905	6.12035	7.00413	6.0613	10.1854
	4.21136	6.05457	6.13238	7.05419	6.0706	10.2032
	4.21613	6.05586	6.14433	7.06013	6.08885	10.5266
	4.23135	6.05724	6.1626	7.10683	6.1	10.5984
	4.32587	6.10723	6.17668	7.13448	6.10707	10.6035
	4.43798	6.12231	6.23991	7.16552	6.13814	10.6427
	4.4384	6.14062	6.25726	7.20467	6.15162	10.71
	4.46314	6.14682	6.26279	7.37537	6.17144	10.8488
	4.70467	6.14783	6.27642	7.42196	6.18106	11.0157
	4.71119	6.21947	6.29696	7.48373	6.20545	11.0754
	4.75565	6.25018	6.3515	7.52417	6.21298	11.1166
	4.7599	6.25247	6.3658	7.555	6.22191	11.1557
	4.96518	6.27315	6.3697	7.56498	6.23545	11.1745
	5.10384	6.28417	6.39885	7.58675	6.24772	11.1805
	5.11631	6.34062	6.43137	7.59847	6.26795	11.2348
	5.14673	6.51629	6.44067	7.60012	6.32437	11.2847
	5.43855	6.53405	6.45357	7.63846	6.3474	11.4629
	5.60339	6.54919	6.4715	7.78125	6.3738	11.5394
	6.16107	6.60291	6.49129	7.8159	6.38309	11.6539
	6.23111	6.66828	6.51472	7.82614	6.386	11.8236
	6.5633	6.7013	6.51945	7.88798	6.43395	11.8271
	9.11323	6.74563	6.52035	7.91125	6.4351	12.009
	10.3637	6.76775	6.53199	7.91458	6.45355	12.0277
		6.79488	6.53645	8.0928	6.49134	12.1627
		6.81838	6.54473	8.19847	6.5651	12.2797
		6.82958	6.58369	8.2305	6.58543	12.4154
		6.83919	6.61777	8.29276	6.58648	12.7077
		6.86449	6.70004	8.36769	6.60987	12.7756
		6.89456	6.70923	8.42331	6.6161	12.8022
		6.93975	6.71262	8.50398	6.68664	12.8257
		6.99993	6.7413	8.55688	6.70018	12.8759
		7.01136	6.76586	8.6268	6.7186	12.974
		7.07969	6.83764	8.62836	6.73841	12.9815
		7.09079	6.90355	8.64392	6.80779	13.005
		7.11464	6.97768	8.6455	6.80995	13.1452
		7.22991	6.98087	8.66802	6.82517	13.1562
		7.25315	7.00836	8.6825	6.88863	13.4329
		7.34589	7.03081	8.76231	6.9305	13.4858
		7.42387	7.0805	8.76396	6.96532	13.5046
		7.45109	7.1036	8.89042	6.97151	13.5366
		7.57328	7.10455	8.94908	7	13.7415
		7.64842	7.12828	8.96361	7.0623	13.807
		7.66169	7.12833	8.96395	7.0751	13.8123
		7.66421	7.15628	8.99771	7.10018	13.9389
		7.68731	7.17746	9.12898	7.11091	13.9729
		7.70781	7.21621	9.12981	7.11973	14.4412
		7.71795	7.22341	9.17556	7.12613	14.4818
		7.85117	7.24709	9.26671	7.14054	14.5034
		7.89716	7.24815	9.26837	7.20174	15.9142
		7.91245	7.29503	9.43126	7.20281	15.9631
		7.98533	7.29592	9.46565	7.25629	16.62
		8.08042	7.30517	9.49397	7.2823	17.1139
		8.08228	7.30866	9.50745	7.29314	17.2096
		8.10212	7.31584	9.56114	7.30096	17.7735
		8.16685	7.34136	9.63037	7.30244	18.1915
		8.17079	7.34516	9.80823	7.32611	19.9506
		8.17618	7.38985	9.8776	7.43989	21.7824
		8.28748	7.39047	9.96408	7.46866	22.1239
		8.31988	7.45734	9.9915	7.47764	23.9845
		8.63045	7.46567	9.99992	7.57512	30.7141
		9.11652	7.46903	10.0207	7.57851	36.6243
		9.38716	7.50413	10.0692	7.60342
		9.62274	7.50899	10.1827	7.61601
		9.87769	7.58949	10.2824	7.72111
		9.99914	7.63692	10.4926	7.7795
		10.2181	7.68377	10.5368	7.81013
		10.2648	7.72726	10.548	7.8102
		10.4763	7.76118	10.8474	7.82004
		10.5768	7.77043	10.8743	7.83096
		10.7556	7.77043	11.0363	7.8388
		10.9672	7.79861	11.1276	7.91834
		11.1415	7.85176	11.1636	7.96269
		12.1171	7.87587	11.1792	7.97051
		12.1924	7.90521	11.2515	8.00689
		12.2975	7.91496	11.5329	8.06932
		12.8413	7.9286	11.8454	8.07099
		13.3902	7.94786	12.0097	8.18914
		14.0523	8.01612	12.041	8.229
			8.01879	12.145	8.28433
			8.04265	12.4795	8.34848
			8.06806	12.7224	8.35423
			8.09889	12.7965	8.46301
			8.22464	12.9871	8.46549
			8.23002	12.9967	8.48482
			8.24396	13.0253	8.50328
			8.25048	13.0763	8.58787
			8.27471	13.0866	8.6383
			8.27846	13.2756	8.63963
			8.29058	13.4196	8.65146
			8.31452	13.4208	8.8023
			8.34568	13.5128	8.807
			8.37553	13.666	8.82438
			8.45891	13.8413	8.84809
			8.52814	13.9717	8.8772
			8.54086	14.018	8.97512
			8.59214	14.1384	9.01333
			8.651	14.7502	9.024
			8.66012	14.8019	9.12328
			8.70151	15.0244	9.13942
			8.71462	15.028	9.17508
			8.71642	15.1811	9.21456
			8.76503	15.4093	9.2198
			8.95663	15.4287	9.22489
			8.97425	15.7098	9.26456
			8.98097	15.9358	9.30579
			8.99822	15.9498	9.30667
			9.00016	16.471	9.37449
			9.00971	16.5947	9.38971
			9.05792	20.8576	9.45489
			9.06458	22.1091	9.48326
			9.0826	23.5768	9.4871
			9.08643	23.6726	9.5285
			9.19392	23.9941	9.55433
			9.21104	26.104	9.55824
			9.21912		9.61443
			9.22728		9.72328
			9.30399		9.81143
			9.33415		9.825
			9.3837		9.87471
			9.39896		9.87646
			9.4016		9.92476
			9.438		9.9323
			9.4832		9.97913
			9.51568		10.0502
			9.5845		10.07
			9.69023		10.0753
			9.77468		10.0861
			9.77635		10.1258
			9.80682		10.1824
			9.81877		10.3542
			9.95065		10.3731
			10.0496		10.4407
			10.073		10.5895
			10.179		10.6149
			10.1963		10.6738
			10.2027		10.6896
			10.2045		10.7451
			10.3668		10.7885
			10.4593		10.8183
			10.4858		10.8234
			10.5752		10.8815
			10.6972		10.8895
			10.6998		10.9579
			10.7291		10.9597
			10.8582		11.0612
			10.889		11.1798
			10.9073		11.4649
			10.9818		11.5285
			11.0956		11.5881
			11.2929		11.6757
			11.6626		11.692
			11.8245		11.723
			11.826		11.7739
			11.8784		11.8894
			12.0967		11.9335
			12.1556		11.9723
			12.5327		12.1236
			13.1038		12.2251
			13.2742		12.3005
			13.3494		12.3526
			14.6617		12.5035
			14.9532		12.5249
			15.083		13.143
			15.106		13.4899
			15.2044		13.5047
			15.3465		13.6014
			15.452		13.8493
			15.6193		13.9492
			15.7786		14.2586
			17.7261		14.2688
			17.8609		14.7298
			18.0273		15.2314
			18.1084		18.7797
			21.6822		20.2266
					20.862
	STATIC	SHEAR	DMSO 24hr	Myco 24hr	DMSO 48hr	Myco 48hr
p=	<0.0001		<0.0001	<0.0001	<0.0001	<0.0001	vs. SHEAR
p=					0.8078	<0.0001	Treatment 48hrs vs 24hrs same treatment
p=			0.0113		<0.0001		DMSO vs Myco at different time points
