# Supplementary material for: The Mycobacterium ulcerans toxin mycolactone causes destructive Sec61-dependent loss of the endothelial glycocalyx and vessel basement membrane to drive skin necrosis
Source: eLife. 2025 Feb 6;12:RP86931. doi: 10.7554/eLife.86931 (PMC11801798; doi:10.7554/eLife.86931)
Supplement: Figure 3—source data 1. — Raw data: HDMEC membrane fraction raw peptide data. Total proteins: Normalised differential expression analysis. Downregulated proteins. Upregulated proteins. Multi-pass membrane proteins >twofold downregulated by mycolactone in HDMEC, with information on whether they have a signal peptide, the amino terminus extracellular, whether they are glycosylated or have at least one long loops (>50aa). [file elife-86931-fig3-data1.xlsx]

## Sheet: Raw data
Checked	Confidence	Sequence	Modifications	Qvality PEP	Qvality q-value	Number of Protein Groups	Number of Proteins	Number of PSMs	Master Protein Accessions	Number of Missed Cleavages	Theo MHplus in Da	Found in Sample in S77 F21 126 Sample 1 T0	Found in Sample in S78 F21 127N Sample 1 T8	Found in Sample in S79 F21 127C Sample 1 T24	Found in Sample in S80 F21 128N Sample 2 T0	Found in Sample in S81 F21 128C Sample 2 T8	Found in Sample in S82 F21 129N Sample 2 T24	Found in Sample in S83 F21 129C Sample 3 T0	Found in Sample in S84 F21 130N Sample 3 T8	Found in Sample in S85 F21 130C Sample 3 T24	Abundance F21 126 Sample 1 T0	Abundance F21 127N Sample 1 T8	Abundance F21 127C Sample 1 T24	Abundance F21 128N Sample 2 T0	Abundance F21 128C Sample 2 T8	Abundance F21 129N Sample 2 T24	Abundance F21 129C Sample 3 T0	Abundance F21 130N Sample 3 T8	Abundance F21 130C Sample 3 T24	Quan Info	Ions Score A5 Mascot	Confidence A5 Mascot	Percolator q-Value A5 Mascot	Percolator PEP A5 Mascot
FALSE	High	QHMADLEGHLQSAQK	2xTMT6plex [N-Term; K15]	6.94069e-06	0	1	3	1	Q08378	0	2151.14	High	Not Found	High	High	High	High	High	High	High	45.9		31.7	19.3	29.8	36.4	40.3	17.9	29.5	Unique	51.57	High	0	7.557e-06
FALSE	High	LQGGKDFNMPLTISSLK	3xTMT6plex [N-Term; K5; K17]	3.70197e-06	0	2	6	2	Q96HC4; Q96HC4-4	1	2536.48	High	Not Found	High	High	High	High	High	High	High	77.1		363.2	217.3	447.8	443.2	580.5	381.8	239.2	NotUnique	52.23	High	0	4.104e-06
FALSE	High	TPFLLSGTSYKDLMPHDLAR	2xTMT6plex [N-Term; K11]	3.43529e-05	0	1	6	1	P55084	1	2720.48	High	Not Found	High	High	High	High	High	High	High	69.3		61.3	42	269	97.8	194.2	66.9	65.9	Unique	46.73	High	0	3.606e-05
FALSE	High	TLTGTVIDSGDGVTHVIPVAEGYVIGSCIK	3xTMT6plex [N-Term; K30; T/S]; 1xCarbamidomethyl [C28]	1.75947e-06	0	1	2	4	P61158	0	3746.07	High	High	High	High	High	High	High	High	High	292.1	1.5	120.1	128.2	293.9	270.7	352.7	283.6	216.5	Unique	34.52	High	0	2.609e-05
FALSE	High	GFAFVQYVNER	1xTMT6plex [N-Term]	4.88395e-05	0	2	16	1	P07910-2; P07910	0	1558.82	High	High	High	High	High	High	High	High	High	153.4	9.2	15.3	124.7	68.3	94.1	72.7	49.7	66.1	NotUnique	72.52	High	0	5.059e-05
FALSE	High	MIQEVMHSLVK	2xTMT6plex [N-Term; K11]	7.30785e-05	0	1	1	1	Q96KP1	0	1773.02	High	Not Found	High	High	High	High	High	High	High	97		98.8	56.1	89.4	108.3	75.9	47	62.4	Unique	35.2	High	0	7.525e-05
FALSE	High	GDGPFLDSLAK	2xTMT6plex [N-Term; K11]	0.000127389	0	1	5	1	Q7Z6K5-2	0	1577.89	High	High	High	High	High	High	High	High	High	37.9	2.5	18	11.5	19.5	36.3	16.8	8.1	16.5	Unique	62.15	High	0	0.0001297
FALSE	High	MALGVAAINQAIK	2xTMT6plex [N-Term; K13]	4.00904e-06	0	1	2	2	Q86VI3	0	1758.07	High	High	High	High	High	High	High	High	High	115.4	0.9	45.6	61.8	86.3	62.9	99.6	78.1	59.7	Unique	67.74	High	0	4.429e-06
FALSE	High	RLLGADSATVFNIQEPEEETANQEYK	2xTMT6plex [N-Term; K26]; 1xDeamidated [Q/N]	1.92191e-07	0	1	8	2	Q8WX93	1	3411.73	Not Found	Not Found	Not Found	High	Not Found	High	High	Not Found	High				1.5		1.9	2.5		1.7	Unique	53.09	High	0	2.853e-07
FALSE	High	LTSDLTFAYER	1xTMT6plex [N-Term]	0.000120964	0	1	4	1	H3BP20	0	1544.82	High	High	High	High	High	High	High	High	High	67.9	1	24.8	52.6	89.6	40.1	64.5	46.5	18.7	Unique	64.58	High	0	0.000123
FALSE	High	SLLINAVEASCIR	1xTMT6plex [N-Term]; 1xCarbamidomethyl [C11]	6.40951e-05	0	2	9	2	Q96C36; P32322-3	0	1674.94	High	High	High	High	High	High	High	High	High	164.2	1.2	46.1	70.1	135.5	95.7	108	73.8	88.4	NotUnique	59.17	High	0	6.602e-05
FALSE	High	GMTTLLSSLGAQCVIASR	1xTMT6plex [N-Term]; 1xCarbamidomethyl [C13]	1.05233e-07	0	1	6	3	Q16698	0	2094.12	High	High	High	High	High	High	High	High	High	189.5	7	133.8	124.3	171.6	188.2	109.6	70.9	104.5	Unique	54.54	High	0	6.024e-07
FALSE	High	LLSLGAQANFFHPEK	2xTMT6plex [N-Term; K15]	2.43568e-05	0	2	19	1	Q9Y2X7; Q14161	0	2130.21	High	High	High	High	High	High	High	High	High	113.8	2.3	96.1	51.9	60.2	141.8	61.6	40	64.8	NotUnique	28.66	High	0	2.565e-05
FALSE	High	IGRPSETGIIGIIDPECR	1xTMT6plex [N-Term]; 1xCarbamidomethyl [C17]	2.41428e-05	0	1	5	1	Q16531	0	2212.2	High	Not Found	High	High	High	High	High	High	High	164		78.4	77.4	98.7	166.8	83.3	54.1	90.7	Unique	53.22	High	0	2.54e-05
FALSE	High	ELLESNFTLVGDDGTNKEATSTGK	3xTMT6plex [N-Term; K17; K24]	4.16932e-05	0	1	2	1	Q96A33	1	3213.71	High	High	High	High	High	High	High	High	High	51.2	0.8	54	74.9	178.4	74.9	208.4	102.6	50	Unique	48.74	High	0	4.342e-05
FALSE	High	EHSLIKPYQGVGSSSMPLWDFQGSTMLTSQYVR	3xTMT6plex [N-Term; K6; S]	3.40517e-05	0	1	4	4	Q12907	0	4417.29	High	Not Found	High	High	High	High	High	High	High	85.8		11.5	35.2	117.7	38.4	99.1	61.4	30.1	Unique	17.14	High	7.07e-05	0.0002807
FALSE	High	EHSLIKPYQGVGSSSMPLWDFQGSTMLTSQYVR	2xTMT6plex [N-Term; K6]	3.70026e-08	0	1	4	1	Q12907	0	4188.13	High	Not Found	High	High	High	High	High	High	High	45		16.3	38.9	48.2	15.4	45.3	25.1	10.2	Unique	37.36	High	0	4.579e-08
FALSE	High	DAGYGGLSLSIEGPSK	2xTMT6plex [N-Term; K16]	4.49808e-06	0	2	5	1	P21333-2; Q60FE5	0	2009.1	High	Not Found	High	High	High	High	High	High	High	11.6		6.5	2.5	2.9	7.1	3.2	3	1.9	NotUnique	43.57	High	0	4.931e-06
FALSE	High	TEVSFTLNEDLANIHDIGGKPASVSAPR	2xTMT6plex [N-Term; K20]; 1xDeamidated [N13]	1.09028e-07	0	1	1	1	P13984	0	3397.8	High	Not Found	High	High	High	High	High	High	High	23.9		13.7	6.4	12	17	18.8	10.7	8.9	Unique	57.64	High	0	1.322e-07
FALSE	High	MAPYQGPDAVPGALDYK	2xTMT6plex [N-Term; K17]	1.36002e-08	0	1	5	1	O43707	0	2251.18	High	Not Found	High	High	High	High	High	High	High	240.2		226.4	92.9	127.5	271.9	122.8	84.6	130.8	Unique	80.4	High	0	1.733e-08
FALSE	High	NVLTNTQSENER	1xTMT6plex [N-Term]	3.60493e-06	0	1	2	1	Q8TD16-2	0	1633.83	High	Not Found	High	High	High	High	High	High	High	35		10.8	2.5	16.3	19.4	22.9	5.4	7.8	Unique	78.89	High	0	3.994e-06
FALSE	High	QEDFMTTMDANEEK	2xTMT6plex [N-Term; K14]	1.47215e-05	0	2	4	1	Q01082; Q01082-3	0	2147	High	Not Found	High	High	High	High	High	High	High	112		87.1	80.3	84.1	108.4	85.8	51.3	73.7	NotUnique	44.16	High	0	1.578e-05
FALSE	High	TTLLNYILTEQHSK	2xTMT6plex [N-Term; K14]	1.32397e-05	0	1	30	1	Q8IUF1	0	2119.22	High	Not Found	High	High	High	High	High	High	High	38.1		18.4	10.3	21.5	40	18.8	14.8	14.6	Unique	30.7	High	0	1.416e-05
FALSE	High	SNIWLAAVTK	2xTMT6plex [N-Term; K10]	5.47425e-05	0	1	9	1	E9PFW3	0	1560.95	High	Not Found	High	High	High	High	High	High	High	271.1		95.2	86	123.4	146.2	129.1	75.9	108.6	Unique	73.46	High	0	5.67e-05
FALSE	High	LKGEIDASVPELEGDLR	2xTMT6plex [N-Term; K2]	2.08139e-07	0	1	1	2	Q09666	1	2299.29	High	Not Found	High	High	High	High	High	High	High	546.2		258.8	245.7	209.7	291.9	243.5	177.8	267.4	Unique	59.17	High	0	2.478e-07
FALSE	High	LRPSGDDVELIGEEEDVSVYDIADHPDFR	1xTMT6plex [N-Term]	0.000141241	0	1	2	1	Q9C0C9	0	3516.7	High	Not Found	High	High	High	High	High	High	High	1.7		1.4	2.6	2.5	2.7	2.3	1.6	2.1	Unique	32.28	High	0	0.0001428
FALSE	High	QSTSCLDSEEIRENQGEVILEVQETYCETSGK	2xTMT6plex [N-Term; K32]; 1xDeamidated [Q/N]; 2xCarbamidomethyl [C5; C27]	7.05685e-05	0	2	4	3	Q9UPN3; Q9UPN3-5	1	4177.98	High	Not Found	High	Not Found	High	High	High	High	High	3.2		2.6		2.7	3.9	1.4	1.8	2.2	NotUnique	45.51	High	0	7.245e-05
FALSE	High	ALIVLNNLSVNAENQR	1xTMT6plex [N-Term]	4.45843e-06	0	1	1	1	Q9UH62	0	1997.13	High	High	High	High	High	High	High	High	High	85.6	9.8	67.9	59.8	72.5	96.2	73.6	57.3	99.2	Unique	56.62	High	0	4.893e-06
FALSE	High	VISTMSVGIDHLALDEIK	3xTMT6plex [N-Term; K18; S]	2.06303e-07	0	1	2	2	Q9UBQ7	0	2628.52	High	Not Found	High	High	High	High	High	High	High	61		37.4	32.9	63.4	70.5	51.5	40.4	50	Unique	58.14	High	0	1.185e-06
FALSE	High	LLTPNPGYGTQAGPSPAPPTPPEEEDLR	1xTMT6plex [N-Term]	2.07782e-05	0	1	2	1	Q9GZU1	0	3130.59	High	Not Found	High	Not Found	High	Not Found	High	High	Not Found	7.4		1.1		3.7		2.6	3.1		Unique	56.17	High	0	2.194e-05
FALSE	High	SELDVGNFAEEFTR	1xTMT6plex [N-Term]	0.000140033	0	1	4	1	O75676	0	1842.91	High	Not Found	High	High	High	High	High	High	High	7.7		2.5	7.4	7	2.9	9.4	3.3	6.3	Unique	58.93	High	0	0.0001426
FALSE	High	ALEEGLTPQEICDKYHIIHADIYR	2xTMT6plex [N-Term; K14]; 1xCarbamidomethyl [C12]	0.000127389	0	1	3	1	P56192	1	3342.76	High	Not Found	High	High	High	High	High	High	High	11.6		14.5	12.2	17.9	14.5	15.5	12.7	11.7	Unique	23.97	High	0	0.0001296
FALSE	High	IYRAEDIPQMDDAFSQTVK	2xTMT6plex [N-Term; K19]	3.69886e-09	0	2	7	1	Q9NZM1; Q9NZM1-3	1	2685.4	High	Not Found	High	High	High	High	High	High	High	25.5		87.4	42.3	146.5	153.8	201	94	79.2	NotUnique	83.77	High	0	4.884e-09
FALSE	High	MGHLACFAGGMFALGADGSR	1xTMT6plex [N-Term]; 1xCarbamidomethyl [C6]	2.11909e-06	0	1	3	1	O60476	0	2255.07	High	Not Found	High	High	High	High	High	High	High	10.7		1.6	9.2	14.4	2.7	13	5.6	2.7	Unique	62.29	High	0	2.371e-06
FALSE	High	LNQLSVNLWHLAQR	1xTMT6plex [N-Term]	8.28458e-06	0	1	7	1	E7EWW0	0	1921.1	High	Not Found	High	High	High	High	High	High	High	71.2		48	35.1	50.6	67.2	43.3	30.6	38.4	Unique	53.01	High	0	8.963e-06
FALSE	High	GLDDLDADADDGWAGLHEEVDYSEK	2xTMT6plex [N-Term; K25]	2.17318e-10	0	1	2	1	Q5JSZ5	0	3193.48	High	Not Found	High	High	High	High	High	High	High	48		19.1	25.8	31.3	27.2	40.5	23.9	14.9	Unique	96.41	High	0	3.08e-10
FALSE	High	ETEVIDPQDLLEGR	1xTMT6plex [N-Term]	1.88545e-05	0	1	2	1	P31431	0	1842.96	High	High	High	High	High	High	High	High	High	100.3	1.5	20.5	44.4	42.7	40.6	51.9	26.5	37.8	Unique	39.07	High	0	1.998e-05
FALSE	High	LSTEPSSEALGVGEVLHVK	2xTMT6plex [N-Term; K19]	8.5109e-07	0	1	2	1	Q99941	0	2410.36	High	Not Found	High	High	High	High	High	High	High	34.5		6.9	11.9	25.8	2.2	23.5	10.6	7.4	Unique	51.65	High	0	9.742e-07
FALSE	High	SIFYVPDMKPSMFDVSR	2xTMT6plex [N-Term; K9]	0.000102625	0	2	4	1	Q12931; I3L0K7	0	2477.3	High	Not Found	High	High	High	High	High	High	High	176.9		77.3	97.2	171.7	143.9	179.2	116.6	129.6	NotUnique	37.4	High	0	0.0001051
FALSE	High	YQDEVFGGFVTEPQEESEEEVEEPEER	1xTMT6plex [N-Term]	4.06073e-05	0	1	1	2	Q13283	0	3445.53	High	High	High	High	High	High	High	High	High	74.5	4.9	22.7	51.4	57.5	32.1	76.6	56.8	27.8	Unique	52.99	High	0	8.746e-05
FALSE	High	KWLLLSDPDDFSAGAR	2xTMT6plex [N-Term; K1]	1.77465e-07	0	1	15	1	O75923-8	1	2249.23	High	High	High	High	High	High	High	High	High	211.5	5	186.4	175.8	235.1	267.8	237.2	167.6	163.1	Unique	53.13	High	0	2.116e-07
FALSE	High	SPVISIDPPSSTVQQGQDASFK	2xTMT6plex [N-Term; K22]	1.54059e-06	0	1	1	2	P98160	0	2746.47	High	High	High	High	High	High	High	High	High	456.1	0.7	69.6	274.8	346.2	139.8	376.4	224.1	139.6	Unique	58.88	High	0	1.735e-06
FALSE	High	FPTLTNINENNPTLLNPIKR	2xTMT6plex [N-Term; K19]	3.40517e-05	0	1	1	1	P03915	1	2767.59	High	Not Found	High	High	High	High	High	High	High	30.8		18.3	22.5	35.6	26.9	28.4	24.2	26.8	Unique	39.23	High	0	3.553e-05
FALSE	High	DTEGGAAEINCNGVIEVINYTQNSNNETLR	1xTMT6plex [N-Term]; 1xDeamidated [N]; 1xCarbamidomethyl [C11]	1.39717e-07	0	1	5	3	Q96SB4	0	3525.66	High	High	High	High	High	High	High	High	High	30.8	1.3	9.5	13	15.5	18.4	22.2	17.6	12.2	Unique	85.73	High	0	1.68e-07
FALSE	High	DTEGGAAEINCNGVIEVINYTQNSNNETLR	1xTMT6plex [N-Term]; 1xCarbamidomethyl [C11]	9.32756e-05	0	1	5	1	Q96SB4	0	3524.68	High	Not Found	High	High	High	High	High	High	High	7.3		1.1	3.4	7.8	2.8	6	3.7	6.2	Unique	48.24	High	0	9.518e-05
FALSE	High	DGTSFGEYGGWYK	2xTMT6plex [N-Term; K13]	8.89228e-06	0	2	20	1	Q07866-3; Q07866-9	0	1924.95	High	Not Found	High	High	High	High	High	High	High	21.3		11.1	2.8	7.1	16.1	9	6.6	8	NotUnique	41.34	High	0	9.643e-06
FALSE	High	YLILPVHSNIPMMDQK	2xTMT6plex [N-Term; K16]	4.538e-07	0	1	4	1	Q7L2E3-2	0	2357.31	High	Not Found	High	High	High	High	High	High	High	336.9		136.3	162.8	233.9	168.9	299.5	179.8	143.9	Unique	50.38	High	0	5.296e-07
FALSE	High	DATSRPTDNILIPQLIR	1xTMT6plex [N-Term]	0.000141241	0	1	1	1	Q9UGP8	0	2152.23	High	Not Found	High	High	High	High	High	High	High	34.6		21.3	22	33.8	30	30.7	18.7	31	Unique	43.51	High	0	0.0001431
FALSE	High	GGGGSFGYSYGGGSGGGFSASSLGGGFGGGSR	1xTMT6plex [N-Term]	1.43316e-10	0	1	1	1	P35527	0	2934.32	High	Not Found	High	High	High	High	High	High	High	48.3		30.6	33.1	31.6	34.8	16.1	14.9	23.5	Unique	97.8	High	0	2.055e-10
FALSE	High	ATVPLQSNVIEAAPDMK	2xTMT6plex [N-Term; K17]	8.4325e-06	0	1	2	1	O75165	0	2242.25	High	Not Found	High	High	High	High	High	High	High	308.6		174.1	172.1	189.1	213.9	179.9	114.3	159.8	Unique	52.78	High	0	9.104e-06
FALSE	High	HNLIDQDMACAILIR	1xTMT6plex [N-Term]; 1xCarbamidomethyl [C10]	7.65273e-07	0	2	4	1	Q9UPN3; Q9UPN3-5	0	2012.06	High	High	High	High	High	High	High	High	High	27.9	1.2	12.9	30.9	57.5	23.9	32.3	34.9	34.7	NotUnique	79.24	High	0	8.786e-07
FALSE	High	ADEMLSEDVSVEPEGDQGLESLQGK	2xTMT6plex [N-Term; K25]	3.76811e-06	0	1	8	1	Q9H4A3-7	0	3120.53	High	Not Found	High	High	High	High	High	High	High	16.5		1.5	3.2	2.1	9.2	1.3	1.5	2.5	Unique	57.34	High	0	4.154e-06
FALSE	High	WEVLIGSSHILTPTR	1xTMT6plex [N-Term]	5.01432e-05	0	1	4	1	Q15833-3	0	1938.1	High	High	High	High	High	High	High	High	High	29	6.9	49.4	44.2	11.7	17.6	13.6	6.8	13.2	Unique	42.11	High	0	5.188e-05
FALSE	High	IHFPLATYAPVISAEK	3xTMT6plex [N-Term; K16; S/T]	0.000125212	0	3	14	4	F5H5D3; Q71U36; P68366	0	2444.45	High	High	High	High	High	High	High	High	High	1206.8	39.1	299.1	243.4	449.4	959.6	458.4	312.5	378.6	NotUnique	29.07	High	0	0.0001275
FALSE	High	IHFPLATYAPVISAEK	2xTMT6plex [N-Term; K16]	8.4325e-06	0	3	14	7	F5H5D3; Q71U36; P68366	0	2215.29	High	Not Found	High	High	High	High	High	High	High	1284.1		485.8	329.1	409.1	800.5	413	310	366.9	NotUnique	48.28	High	0	9.637e-05
FALSE	High	LLVTDMSDAEQYR	1xTMT6plex [N-Term]	1.99172e-06	0	1	2	1	O14929	0	1769.89	High	High	High	High	High	High	High	High	High	114.2	3.3	25.2	51.5	32.3	70.7	66.1	39.8	43.1	Unique	88.8	High	0	2.244e-06
FALSE	High	CHPLVDPEPFVALCEK	2xTMT6plex [N-Term; K16]; 2xCarbamidomethyl [C1; C14]	6.46517e-08	0	1	1	1	P04275	0	2369.24	High	Not Found	High	High	High	High	High	High	High	124.9		8.4	76.5	326.2	15.2	82.9	95.4	7.7	Unique	76.18	High	0	7.909e-08
FALSE	High	LQSFFGGTVMGESGMK	2xTMT6plex [N-Term; K16]	2.93137e-05	0	1	3	2	P26006	0	2134.11	High	Not Found	High	High	High	High	High	High	High	408.3		119.3	217.8	326.9	169.5	361.9	265.7	111	Unique	40.37	High	0	5.597e-05
FALSE	High	WCEYGLTFTEK	2xTMT6plex [N-Term; K11]; 1xCarbamidomethyl [C2]	1.06135e-05	0	1	7	3	P45880-2	0	1891.97	High	Not Found	High	High	High	High	High	High	High	377.7		113.3	139.2	196	226.3	205.6	134.7	194.6	Unique	70.39	High	0	1.147e-05
FALSE	High	YSIGGLSPFSEYAFR	1xTMT6plex [N-Term]	5.66226e-06	0	1	4	1	P10586	0	1922.98	High	Not Found	Not Found	High	High	High	High	High	High	17.7			6.2	20.3	1	16.6	9.9	0.7	Unique	80.28	High	0	6.214e-06
FALSE	High	ALAPTWEQLALGLEHSETVK	3xTMT6plex [N-Term; T5; K20]	2.73169e-05	0	1	2	1	Q8NBS9	0	2880.64	High	Not Found	High	High	High	High	High	High	High	60.2		13.2	15.1	47.9	33.1	49.7	23.4	17.5	Unique	28.66	High	0	2.866e-05
FALSE	High	ALAPTWEQLALGLEHSETVK	2xTMT6plex [N-Term; K20]	3.41414e-10	0	1	2	4	Q8NBS9	0	2651.48	High	High	High	High	High	High	High	High	High	684.5	3.2	298.9	279.1	382.3	210.1	368.4	195.1	165.5	Unique	83.95	High	0	4.782e-10
FALSE	High	TANEGGSLLYEQLGYK	2xTMT6plex [N-Term; K16]	1.18019e-05	0	1	2	1	Q96QD8	0	2201.19	High	Not Found	High	High	High	High	High	High	High	225.9		31.7	52.2	79.8	59	100.2	68.1	60.8	Unique	41.83	High	0	1.264e-05
FALSE	High	LFHPLDQSVWAVK	2xTMT6plex [N-Term; K13]	1.75679e-05	0	1	1	1	Q9H0X9	0	1998.16	High	Not Found	High	High	High	High	High	High	High	84.1		55.9	54.4	56	71.2	59.9	35.6	73	Unique	40.9	High	0	1.873e-05
FALSE	High	AQDGSHPLSLQDLIEK	2xTMT6plex [N-Term; K16]	6.2968e-06	0	2	14	1	D6REX3; H0YAB3	0	2209.22	High	Not Found	High	High	High	High	High	High	High	173.7		161.5	112.5	84	106.7	95.7	61.1	58.7	NotUnique	65.08	High	0	6.863e-06
FALSE	High	TVTPDASVYSDIVGK	2xTMT6plex [N-Term; K15]	6.35365e-05	0	1	4	1	Q9ULP9	0	2010.12	High	Not Found	High	High	High	High	High	High	High	73.2		40	25.3	45.8	54.7	43.5	24.5	30	Unique	50.32	High	0	6.557e-05
FALSE	High	GFIGPGIDVPAPDMSTGER	1xTMT6plex [N-Term]	0.00013647	0	1	3	2	P00367	0	2145.08	High	High	High	High	High	High	High	High	High	75	11.6	56.2	44.5	62.7	73	66.5	40.4	53.9	Unique	42.86	High	0	0.0001385
FALSE	High	TDTAADGETTATEELEK	2xTMT6plex [N-Term; K17]	2.56811e-05	0	1	7	1	Q9Y2J2-2	0	2240.12	High	Not Found	High	High	High	High	High	High	High	350.5		110.5	86.8	109.5	156.6	121.1	89.6	123.1	Unique	45.59	High	0	2.704e-05
FALSE	High	SWPVDFHWEEPSSR	1xTMT6plex [N-Term]	2.56811e-05	0	1	4	2	A0A0G2JJD3	0	1987.95	High	High	High	High	High	High	High	High	High	186.2	9.5	182.8	101.3	107.4	202.7	122	80.7	166.7	Unique	31.67	High	0	2.707e-05
FALSE	High	DFISLGLQDGHLVFR	1xTMT6plex [N-Term]	1.79091e-06	0	1	1	1	P98160	0	1946.07	High	High	High	High	High	High	High	High	High	225.7	1.9	12.4	73.7	58.4	23.6	67.5	47.2	26.6	Unique	77.35	High	0	2.02e-06
FALSE	High	SLDVNQDSELKFNEYWR	2xTMT6plex [N-Term; K11]	9.40899e-05	0	1	1	1	Q99584	1	2601.33	High	Not Found	High	High	High	High	High	High	High	12.5		87.7	43.9	201.8	143.8	163.5	76.5	48.2	Unique	38.87	High	0	9.608e-05
FALSE	High	GTVLLADNVICPGAPDFLAHVR	1xTMT6plex [N-Term]; 1xCarbamidomethyl [C11]	6.52269e-08	0	1	2	2	P21964	0	2564.39	High	High	High	High	High	High	High	High	High	68.7	6.9	52	37.8	50.7	49.4	47.6	37.2	53.8	Unique	62.84	High	0	8.013e-08
FALSE	High	NQDFMNVYYQIR	1xTMT6plex [N-Term]	6.81433e-05	0	1	10	1	Q9UPT5	0	1819.9	High	High	High	High	High	High	High	High	High	106.7	2.2	50.9	27.9	60.2	87.8	55.9	32.6	50.8	Unique	41.18	High	0	7.03e-05
FALSE	High	KVQIFDLMDAK	3xTMT6plex [N-Term; K1; K11]	5.7126e-06	0	1	2	1	Q8TDX7	1	1995.19	High	Not Found	High	High	High	High	High	High	High	207.3		139.5	142.5	166	164.7	271.9	184.5	160.3	Unique	55.18	High	0	6.254e-06
FALSE	High	NPPENSDSGTGK	2xTMT6plex [N-Term; K12]	8.35821e-06	0	1	2	1	P55010	0	1660.85	High	Not Found	High	High	High	High	High	High	High	38.6		11.1	3.4	8.2	22.1	10.3	8.1	11.1	Unique	77.48	High	0	9.052e-06
FALSE	High	DVKPSNVLINALGQVK	3xTMT6plex [N-Term; K3; K16]	1.29051e-06	0	1	2	1	P52564	0	2382.47	High	Not Found	High	High	High	High	High	High	High	119.1		49.9	82.7	81	117.8	78.5	60.7	49.9	Unique	46.21	High	0	1.462e-06
FALSE	High	VNAGDQPGADLGPLITPQAK	2xTMT6plex [N-Term; K20]	0.000109043	0	1	3	1	Q02252	0	2420.35	High	Not Found	High	High	High	High	High	High	High	96.6		72.4	40	89.7	124.3	71.2	42	101.4	Unique	38.55	High	0	0.0001108
FALSE	High	GEYGNAGIMAEVEELR	1xTMT6plex [N-Term]	7.37196e-05	0	1	5	1	Q4L180-2	0	1966.97	High	High	High	High	High	High	High	High	High	47.1	6.8	51.9	38.5	31.2	73.3	29.8	27.8	45.3	Unique	47.32	High	0	7.546e-05
FALSE	High	LVSSENFDDYMK	2xTMT6plex [N-Term; K12]	3.4484e-07	0	1	4	1	P15090	0	1905.97	High	Not Found	High	High	High	High	High	High	High	65		54.5	20.8	17.7	30.7	430.2	306.5	165.9	Unique	88.36	High	0	4.035e-07
FALSE	High	KLVAAASPSAMLSQSLDLSDR	2xTMT6plex [N-Term; K1]	2.54881e-10	0	1	4	1	M0R0P8	1	2618.46	High	Not Found	High	High	High	High	High	High	High	38.8		30.4	30.1	35	34.7	37.1	21.5	14.6	Unique	139.75	High	0	3.603e-10
FALSE	High	EAVEKEFEPLLNWMK	3xTMT6plex [N-Term; K5; K15]	9.05526e-07	0	1	1	2	P14625	1	2550.42	High	High	High	High	High	High	High	High	High	222.3	2.3	362.5	335.4	998.1	407.5	961.1	498.8	241.1	Unique	61.09	High	0	1.039e-06
FALSE	High	SLGDVDDGDTVTDFMAQER	1xTMT6plex [N-Term]	9.63445e-07	0	1	6	1	Q969S9	0	2300.05	High	High	High	High	High	High	High	High	High	81.2	2.2	40	35.5	57.6	72.9	50.9	34.6	53.9	Unique	52.26	High	0	1.102e-06
FALSE	High	EAVEKEFEPLLNWMK	3xTMT6plex [N-Term; K5; K15]; 1xDeamidated [N12]	1.98807e-05	0	1	1	2	P14625	1	2551.41	High	Not Found	High	High	High	High	High	High	High	40.7		45.5	41.6	85.8	51.8	87.2	50.7	32.2	Unique	35.29	High	0	2.114e-05
FALSE	High	KDVLIEFYAPWCGHCK	3xTMT6plex [N-Term; K1; K16]; 2xCarbamidomethyl [C12; C15]	1.87151e-07	0	1	1	1	P13667	1	2710.45	High	High	High	High	High	High	High	High	High	215.5	0.3	30	124.3	226.1	34.4	195.5	105.5	24.3	Unique	49.9	High	0	2.24e-07
FALSE	High	CLELFSELAEDKENYKK	4xTMT6plex [N-Term; K12; K16; K17]; 1xCarbamidomethyl [C1]	1.97059e-05	0	1	1	2	P08238	2	3032.68	High	Not Found	High	High	High	High	High	High	High	65.6		45.9	22	44.8	84.7	43.7	28.5	45.3	Unique	43.7	High	0	8.403e-05
FALSE	High	YGPQYGHPPPPPPPPEYGPHADSPVLMVYGLDQSK	2xTMT6plex [N-Term; K35]	6.46586e-05	0	1	3	1	P14866	0	4243.14	High	Not Found	High	High	High	High	High	High	High	118.5		25.6	98.4	45.7	77	56.7	41.2	56.9	Unique	12.77	High	0	6.65e-05
FALSE	High	EPFPTIYVDSQK	2xTMT6plex [N-Term; K12]	8.62501e-05	0	1	6	1	O43776	0	1882.04	High	Not Found	High	High	High	High	High	High	High	156		31.8	49.2	18.1	54.7	22.8	25.7	42.6	Unique	81.95	High	0	8.868e-05
FALSE	High	LGESQTLLAAAVER	1xTMT6plex [N-Term]	8.40255e-05	0	1	2	1	P82094	0	1686.96	High	High	High	High	High	High	High	High	High	30.6	1.5	20.9	15.4	23.6	28.8	26.7	18.4	22.3	Unique	26.08	High	0	8.606e-05
FALSE	High	LIAQACVSIFPDSGHFNVDNIR	2xTMT6plex [N-Term; S13]; 1xCarbamidomethyl [C6]	9.80121e-06	0	1	4	1	P50990	0	2931.56	High	Not Found	High	High	High	High	High	High	High	100		60.5	58.4	70.8	77.9	41.7	49.7	60.7	Unique	26.72	High	0	1.056e-05
FALSE	High	MNLAIALTAAR	1xTMT6plex [N-Term]	4.06073e-05	0	1	3	1	P43304	0	1373.81	High	High	High	High	High	High	High	High	High	125.4	2.4	34.4	36.8	90	79.9	81.5	34.2	53.3	Unique	66.66	High	0	4.248e-05
FALSE	High	VAAIEALNDGELQK	2xTMT6plex [N-Term; K14]	7.37196e-05	0	1	5	1	P50502	0	1929.11	High	Not Found	High	High	High	High	High	High	High	212.2		228.1	76.7	127.8	263.4	126.1	81.3	142.9	Unique	46.65	High	0	7.578e-05
FALSE	High	TPLYLQPDAYGSLDR	1xTMT6plex [N-Term]	4.92703e-05	0	1	1	1	Q8WUF5	0	1938.02	High	High	High	High	High	High	High	High	High	33.7	1.2	38	18.1	34.5	48.4	40	21.8	16.4	Unique	27.17	High	0	5.096e-05
FALSE	High	HQMALDWVSR	1xTMT6plex [N-Term]	6.46586e-05	0	1	1	1	Q8IVB5	0	1471.77	High	High	High	High	High	High	High	High	High	45.2	1.7	14.8	22.6	36.9	18.4	39.1	26.5	13.6	Unique	46.89	High	0	6.682e-05
FALSE	High	HVPVVYVDYPGPASLTQIYGTFNR	1xTMT6plex [N-Term]; 1xDeamidated [Q17]	7.44992e-06	0	1	1	1	Q14204	0	2923.52	High	Not Found	High	High	High	High	High	High	High	9		1.9	3.6	6.5	3.4	6.5	1.5	3.4	Unique	68.69	High	0	8.117e-06
FALSE	High	HVPVVYVDYPGPASLTQIYGTFNR	1xTMT6plex [N-Term]	2.08061e-08	0	1	1	2	Q14204	0	2922.54	High	Not Found	High	High	High	High	High	High	High	65.4		28.2	36.4	70.7	48.3	49.2	31.4	33.3	Unique	126.84	High	0	2.619e-08
FALSE	High	NQKDDVAQTDLLQIDPNFGSK	3xTMT6plex [N-Term; K3; K21]	1.04186e-10	0	1	7	1	P08195-4	1	3033.65	High	Not Found	High	High	High	High	High	High	High	647.7		106.9	148.9	203.8	222.5	315.3	239.6	232.9	Unique	100.91	High	0	1.502e-10
FALSE	High	ALDQASEEIWNDFR	1xTMT6plex [N-Term]	4.70167e-06	0	2	8	3	F8VQZ7; P50579	0	1922.94	High	High	High	High	High	High	High	High	High	306.6	48.8	200.9	181.4	186.6	195.3	206.6	159.5	154.4	NotUnique	45.18	High	0	5.182e-06
FALSE	High	NFADIDDSWK	2xTMT6plex [N-Term; K10]	9.24681e-05	0	1	1	1	P06280	0	1668.86	High	Not Found	High	High	High	High	High	High	High	99.3		20.7	31.1	97	50.7	76.9	47.6	22.5	Unique	68.57	High	0	9.426e-05
FALSE	High	LLSYASYCIEHGDLELAAK	2xTMT6plex [N-Term; K19]; 1xCarbamidomethyl [C8]	2.66625e-08	0	2	8	1	Q16891-4; Q16891-2	0	2611.38	High	Not Found	High	High	High	High	High	High	High	109.6		40.5	63.6	62.1	70.5	49.4	30	56.3	NotUnique	58.46	High	0	3.335e-08
FALSE	High	VIVIPVGIGPHANLK	2xTMT6plex [N-Term; K15]	1.77398e-08	0	1	1	3	P04275	0	1985.27	High	High	High	High	High	High	High	High	High	648.4	4.7	72.4	431.6	792.2	90.7	580.7	284.5	19.8	Unique	81.17	High	0	2.246e-08
FALSE	High	VSLEDLYNGK	2xTMT6plex [N-Term; K10]	3.68604e-05	0	1	2	1	O60884	0	1595.9	High	Not Found	High	High	High	High	High	High	High	155.9		91	58.8	97.1	137.2	119.3	51.3	72.5	Unique	67.39	High	0	3.847e-05
FALSE	High	VSLEDLYNGK	2xTMT6plex [N-Term; K10]; 1xDeamidated [N8]	5.71961e-05	0	1	2	2	O60884	0	1596.89	High	Not Found	High	High	High	High	High	High	High	309.2		190.2	125.8	143.7	245	170.7	104.8	132.6	Unique	63.79	High	0	5.927e-05
FALSE	High	GVGFVASPLLK	2xTMT6plex [N-Term; K11]	9.80121e-06	0	1	2	1	P15848	0	1545.98	High	High	High	High	High	High	High	High	High	112.7	2.1	56.9	92.9	152	77.1	146.7	93.6	43.2	Unique	84.88	High	0	1.06e-05
FALSE	High	SAIGEEDEVNGNLLETDVDGQVGTTQENLNQQYQK	2xTMT6plex [N-Term; K35]; 2xDeamidated [N/Q]	1.23329e-09	0	2	8	2	Q03001; F6QMI7	0	4296.07	High	Not Found	High	High	High	High	High	High	High	18.2		10.6	8.1	8.6	25.1	11.1	7.9	13.9	NotUnique	120.45	High	0	1.671e-09
FALSE	High	LAPDYDALDVANK	2xTMT6plex [N-Term; K13]	5.13688e-06	0	1	6	2	P62750	0	1863.03	High	Not Found	High	High	High	High	High	High	High	46.8		14.1	10.2	29.7	27.7	46.8	37.6	22.9	Unique	89	High	0	5.611e-06
FALSE	High	AASGLLSIGLCK	2xTMT6plex [N-Term; K12]; 1xCarbamidomethyl [C11]	5.18256e-06	0	1	4	1	Q96CM8-2	0	1647.99	High	Not Found	High	High	High	High	High	High	High	55.9		37.5	27.4	29.8	49.6	16.4	10.3	24.3	Unique	82.09	High	0	5.661e-06
FALSE	High	HGNVASLVQR	1xTMT6plex [N-Term]	0.000101738	0	1	1	1	Q9Y5K6	0	1309.75	High	Not Found	High	High	High	High	High	High	High	18.4		10.8	11.1	12.9	9.6	10.3	7.8	8.1	Unique	47.33	High	0	0.000104
FALSE	High	GENSWFSTQVDTVATK	2xTMT6plex [N-Term; K16]	1.74133e-05	0	1	6	1	P08195-4	0	2228.16	High	Not Found	High	High	High	High	High	High	High	224.6		113.9	135.7	148	131.3	219.5	140.9	110.9	Unique	48.8	High	0	1.858e-05
FALSE	High	LLAENNEIISNIR	1xTMT6plex [N-Term]	9.72016e-07	0	1	1	1	Q16706	0	1727.99	High	Not Found	High	High	High	High	High	High	High	89.4		7.7	36.1	52.5	12.9	51.6	25.7	6.5	Unique	94.57	High	0	1.115e-06
FALSE	High	TMNISPEQPQH	1xTMT6plex [N-Term]	0.000129603	0	1	1	1	Q9Y6Y8	0	1510.75	High	High	High	High	High	High	High	High	High	239.8	5.8	91	61.3	88.6	152.9	87.8	53.3	64.3	Unique	60.98	High	0	0.0001321
FALSE	High	LIAEEGVDSLNVK	2xTMT6plex [N-Term; K13]	1.03419e-06	0	1	1	1	O95202	0	1845.07	High	Not Found	High	High	High	High	High	High	High	244.6		93.4	90	87	120.5	84.9	54.8	87.6	Unique	56.57	High	0	1.184e-06
FALSE	High	KSSVVLDDGLVQDEFSESVK	3xTMT6plex [N-Term; K1; K20]	5.31441e-11	0	1	3	1	Q9UIQ6	1	2868.58	High	Not Found	High	High	High	High	High	High	High	145.4		28.6	57.8	96.3	47.2	100.3	54.4	37.3	Unique	143.16	High	0	7.82e-11
FALSE	High	KPGNFQGTLDAFFK	3xTMT6plex [N-Term; K1; K14]	2.59781e-06	0	1	1	1	Q8TBP6	0	2257.29	High	Not Found	High	High	High	High	High	High	High	94.2		38	58.2	83.2	71.4	80.9	56.5	57.1	Unique	43.16	High	0	2.901e-06
FALSE	High	NKEVTWEVLEGEVEK	3xTMT6plex [N-Term; K2; K15]	2.68392e-05	0	1	1	1	P05455	1	2476.39	High	Not Found	High	High	High	High	High	High	High	21.3		16.7	15.8	20.5	40.1	21.2	27.1	36.3	Unique	25.79	High	0	2.835e-05
FALSE	High	LFTILHLEESQK	2xTMT6plex [N-Term; K12]	2.85484e-05	0	1	1	1	Q9NWR8	0	1916.13	High	Not Found	High	High	High	High	High	High	High	214.8		96.6	83.7	146.6	148.1	118.5	87.8	118.2	Unique	40.43	High	0	2.987e-05
FALSE	High	LPTVPLSGMYNK	2xTMT6plex [N-Term; K12]	8.28458e-06	0	1	2	1	O14562	0	1778.03	High	Not Found	High	High	High	High	High	High	High	61.8		38.4	33.7	35.7	47.7	30.5	23.3	21.2	Unique	52.84	High	0	8.964e-06
FALSE	High	VHAIQCDVRDPDMVQNTVSELIK	2xTMT6plex [N-Term; K23]; 1xCarbamidomethyl [C6]	3.83511e-07	0	1	5	1	Q16698	1	3125.65	High	Not Found	High	High	High	High	High	High	High	40.1		30.8	18.1	45.3	48.5	22.5	20.4	28.5	Unique	71.51	High	0	4.506e-07
FALSE	High	WDETPASQMGGSTPVLTPGK	2xTMT6plex [N-Term; K20]	2.33053e-05	0	1	1	1	O75533	0	2517.31	High	Not Found	High	High	High	High	High	High	High	125.2		21	66.6	45.7	66.6	49.2	32.5	45.3	Unique	60.98	High	0	2.455e-05
FALSE	High	HYLDFINHYANLFHEK	2xTMT6plex [N-Term; K16]	5.46527e-06	0	1	1	2	Q14204	0	2519.32	High	Not Found	High	High	High	High	High	High	High	225.7		143.4	105.8	160.5	161.1	123.3	90	103	Unique	33.74	High	0	5.972e-06
FALSE	High	IEVLPSHLFLCNK	2xTMT6plex [N-Term; K13]; 1xCarbamidomethyl [C11]	1.4085e-05	0	1	1	1	Q8TDW0	0	2028.17	High	Not Found	High	High	High	High	High	High	High	261.5		105.8	133.3	127.8	123.4	174.6	105.3	127.9	Unique	48.39	High	0	1.504e-05
FALSE	High	KEENLADWYSQVITK	3xTMT6plex [N-Term; K1; K15]	2.76394e-06	0	1	1	2	P07814	1	2511.41	High	Not Found	High	High	High	High	High	High	High	416.4		261.4	155.8	198.2	258	251.5	159.2	172.8	Unique	51.72	High	0	3.081e-06
FALSE	High	TPFGAYGGLLK	2xTMT6plex [N-Term; K11]	1.33573e-05	0	1	2	1	P42765	0	1581.94	High	Not Found	High	High	High	High	High	High	High	244.6		152.9	122.6	213.4	246.9	163.7	95.4	167.2	Unique	56.23	High	0	1.43e-05
FALSE	High	AINCATSGVVGLVNCLR	1xTMT6plex [N-Term]; 2xCarbamidomethyl [C4; C15]	1.33573e-05	0	1	2	1	P49327	0	2033.08	High	High	High	High	High	High	High	High	High	103.5	7.7	38	51.9	39.5	61.1	59.7	48.2	37.1	Unique	59.4	High	0	1.425e-05
FALSE	High	SQEGESVTEDISFLESPNPENK	2xTMT6plex [N-Term; K22]	0.000101738	0	1	3	1	Q9UBV2	0	2894.43	High	High	High	High	High	High	High	High	High	69.7	7.4	30.1	27.5	21.1	18.6	24.8	14.1	13.6	Unique	19.48	High	0	0.0001041
FALSE	High	VLQVSIGPGLPK	2xTMT6plex [N-Term; K12]	9.9988e-05	0	1	1	1	Q12965	0	1666.07	High	Not Found	High	High	High	High	High	High	High	293.6		158	123.2	139.9	197.1	231.8	109.3	77.8	Unique	35.56	High	0	0.000102
FALSE	High	VMQQNLVYYQYHR	1xTMT6plex [N-Term]	0.000142459	0	1	2	1	O75718	0	1971.01	High	Not Found	High	High	High	High	High	High	High	47.5		11.1	19.1	27.2	23	28.9	16.8	13.4	Unique	48.6	High	0	0.0001447
FALSE	High	GFSKPSDLVGVFSCVGGAGAR	2xTMT6plex [N-Term; K4]; 1xCarbamidomethyl [C14]	1.28914e-09	0	2	3	1	P35590-3; P35590	0	2526.35	High	Not Found	High	High	High	High	High	High	High	130.3		10	71	256.9	18.8	214.2	81	22	NotUnique	66.01	High	0	1.745e-09
FALSE	High	LIHQLLTDIGR	1xTMT6plex [N-Term]	7.18127e-05	0	1	2	1	P42345	0	1507.92	High	High	High	High	High	High	High	High	High	78.5	2.5	55.6	33.4	47.4	68.3	44	30.4	36.8	Unique	50.77	High	0	7.372e-05
FALSE	High	NPYYGGESASITPLEDLYKR	2xTMT6plex [N-Term; K19]	1.68153e-09	0	1	6	2	P50395	1	2731.43	High	Not Found	High	High	High	High	High	High	High	20.6		50.6	25.2	65.7	102.6	64.5	41.1	39	Unique	80.19	High	0	2.264e-09
FALSE	High	VIVIPVGIGPHANLK	2xTMT6plex [N-Term; K15]; 1xDeamidated [N13]	1.03355e-05	0	1	1	1	P04275	0	1986.25	High	Not Found	High	High	High	High	High	High	High	24.8		6.6	13.7	32.6	6.9	24.1	15.2	2.7	Unique	45.91	High	0	1.112e-05
FALSE	High	VLAPWITETHFK	2xTMT6plex [N-Term; K12]	9.57395e-05	0	1	7	2	P23467-3	0	1900.11	High	High	High	High	High	High	High	High	High	303.8	1.8	59	140.7	207	64.6	198.8	107.5	43.1	Unique	43.15	High	0	9.797e-05
FALSE	High	KVPTVSRPYSFIEFDTFIQK	3xTMT6plex [N-Term; K1; K20]	2.54555e-05	0	1	1	1	O75396	1	3089.76	High	Not Found	High	High	High	High	High	High	High	207.3		195.9	164.5	311.2	213.9	256.8	162.9	143.2	Unique	16.61	High	0	2.683e-05
FALSE	High	IALTDNALIAR	1xTMT6plex [N-Term]	1.77238e-05	0	1	2	2	P18124	0	1399.85	High	High	High	High	High	High	High	High	High	177.3	8.3	66.1	99.3	112.9	85.6	147.9	101.8	68.7	Unique	86.82	High	0	1.879e-05
FALSE	High	SIQDAELLVK	2xTMT6plex [N-Term; K10]	0.000109991	0	2	9	1	E9PLY5; Q9UPN3	0	1573.96	High	Not Found	High	High	High	High	High	High	High	124.2		84.8	64.8	73.2	113.9	77.4	61.5	75.8	NotUnique	73.38	High	0	0.0001124
FALSE	High	LVNMLDAVQENQHK	2xTMT6plex [N-Term; K14]	1.5543e-06	0	1	1	2	O95810	0	2097.15	High	Not Found	High	High	High	High	High	High	High	102.6		156.9	85.5	106.8	196.9	92.3	62	146.1	Unique	63.8	High	0	1.76e-06
FALSE	High	GPDFTPAFADFGR	1xTMT6plex [N-Term]	7.56763e-05	0	2	5	1	A0A0A0MSA7; A0A0U1RQK7	0	1626.81	High	High	High	High	High	High	High	High	High	23.5	9.4	14.1	17.6	21.8	17.1	23.9	16.3	15.1	NotUnique	53.19	High	0	7.796e-05
FALSE	High	GSNSEIDVDSLNLCLQQYEDLKQPMAER	2xTMT6plex [N-Term; K22]; 1xCarbamidomethyl [C14]	6.34924e-09	0	2	4	1	Q9UPN3; Q9UPN3-5	1	3710.84	High	Not Found	High	High	High	High	High	High	High	68.7		59.3	47.7	53.5	64.7	59.3	30.9	37.8	NotUnique	77.76	High	0	8.245e-09
FALSE	High	LVNMLDAVQENQHK	2xTMT6plex [N-Term; K14]; 1xDeamidated [N]	1.6537e-06	0	1	1	3	O95810	0	2098.14	High	High	High	High	High	High	High	High	High	91.7	1	126.7	74.7	93.5	150.1	77.4	53	129	Unique	66.95	High	0	1.858e-06
FALSE	High	LVNMLDAVQENQHK	2xTMT6plex [N-Term; K14]; 1xOxidation [M4]	3.75152e-05	0	1	1	1	O95810	0	2113.15	High	Not Found	High	High	High	High	High	High	High	32.6		39.2	28.2	29.1	55.3	26.1	15	42.1	Unique	54.26	High	0	3.912e-05
FALSE	High	GNEFEDYCLK	2xTMT6plex [N-Term; K10]; 1xCarbamidomethyl [C8]	0.000143686	0	1	2	2	P26196	0	1732.86	High	High	High	High	High	High	High	High	High	245.9	2.9	101.7	139	115.5	115.1	125.2	97.7	99.5	Unique	43.41	High	0	0.0001463
FALSE	High	GAEASAASEEEAGPQATEPSTPSGPESGPTPASAEQNE	1xTMT6plex [N-Term]	8.04422e-05	0	1	1	1	P49006	0	3854.72	High	High	High	High	High	High	High	High	High	26.1	11.1	35	15.5	16.6	31.7	17.6	7	3	Unique	65.31	High	0	8.281e-05
FALSE	High	IFPLLGLHEEGLR	1xTMT6plex [N-Term]	1.3961e-05	0	1	5	1	J3KNI1	0	1723.01	High	Not Found	High	High	High	High	High	High	High	55.5		21.7	19.2	17	29.2	22.3	14.2	17.2	Unique	44.92	High	0	1.491e-05
FALSE	High	GAGIGGLGITVEGPSESK	2xTMT6plex [N-Term; K18]	1.83913e-06	0	1	10	2	O75369-8	0	2087.17	High	High	High	High	High	High	High	High	High	437.3	4.7	389.7	187.5	217.8	420.5	183	132	169.1	Unique	43.96	High	0	2.078e-06
FALSE	High	FGAQQDTIEVPEKDLVDK	3xTMT6plex [N-Term; K13; K18]	2.23474e-06	0	1	2	1	P49736	1	2719.51	High	Not Found	High	High	High	High	High	High	High	51.2		6.8	16.1	17.8	17.8	22.4	18.7	15	Unique	56.81	High	0	2.499e-06
FALSE	High	GGTYDTYVGSGWLIK	2xTMT6plex [N-Term; K15]	1.32486e-07	0	1	2	2	Q96AY3	0	2075.12	High	High	High	High	High	High	High	High	High	381.3	5	89.9	167.8	291.1	102	227.5	108	54.9	Unique	94.88	High	0	1.588e-07
FALSE	High	VLEAQANTGGIIDTATGK	2xTMT6plex [N-Term; K18]	2.46338e-06	0	2	4	1	Q9UPN3; Q9UPN3-5	0	2217.25	High	Not Found	High	High	High	High	High	High	High	181.9		116.5	98.6	104.3	142.8	109.8	79.3	101.8	NotUnique	59.39	High	0	2.74e-06
FALSE	High	TTGMGAIYGMAQTTVDR	1xTMT6plex [N-Term]	8.40255e-05	0	1	1	1	O95470	0	2001.99	High	Not Found	High	High	High	High	High	High	High	177.6		104.1	62.9	91.2	176.5	125.2	77.1	117.4	Unique	58.04	High	0	8.578e-05
FALSE	High	EVLASDLVVK	2xTMT6plex [N-Term; K10]	8.32965e-05	0	1	3	2	Q13423	0	1530.95	High	Not Found	High	High	High	High	High	High	High	344.4		195.8	206.2	254.1	297.1	263	153.2	210.5	Unique	73	High	0	0.0001236
FALSE	High	SKGLAPDLPEDLYHLIK	3xTMT6plex [N-Term; K2; K17]	2.23423e-07	0	1	2	3	P62277	1	2596.53	High	Not Found	High	High	High	High	High	High	High	152.2		174.2	148.1	635.4	356.5	795.4	425.1	247.1	Unique	44.16	High	0	2.64e-07
FALSE	High	GGSHDAPENTLAAIR	1xTMT6plex [N-Term]	1.06135e-05	0	1	2	1	Q9NZC3	0	1737.91	High	High	High	High	High	High	High	High	High	47.8	8.2	30.9	34.1	39.6	42.9	39.4	16.1	31.9	Unique	62.01	High	0	1.141e-05
FALSE	High	SPVYLDLAYLPSGSSAHLVDEEFFQR	3xTMT6plex [N-Term; S14; S15]	3.95495e-05	0	1	2	1	Q66K74	0	3627.93	High	Not Found	High	High	High	High	High	High	High	18.9		10.7	16.1	19.4	19.3	16.9	11.6	8.1	Unique	20.81	High	0	4.11e-05
FALSE	High	TKLETQPQEEYEIINVEVK	3xTMT6plex [N-Term; K2; K19]	5.32204e-06	0	1	5	1	Q4J6C6	1	2977.67	High	Not Found	High	High	High	High	High	High	High	9.2		5.7	2.6	6.2	6.3	8.3	3.5	3.1	Unique	42.89	High	0	5.83e-06
FALSE	High	VLNDYLEETHLK	2xTMT6plex [N-Term; K12]	6.69927e-06	0	1	2	1	Q86VI3	0	1932.08	High	Not Found	High	High	High	High	High	High	High	147.9		64	78.4	83.1	58.9	110.3	77.5	74.5	Unique	35.49	High	0	7.304e-06
FALSE	High	MTDGYSGSDLTALAK	2xTMT6plex [N-Term; K15]	4.15184e-08	0	1	4	1	Q9UBP0	0	1988.04	High	Not Found	High	High	High	High	High	High	High	16		8.8	9.4	14.2	19.4	22	12.2	11.6	Unique	90.28	High	0	5.132e-08
FALSE	High	WVVIGDENYGEGSSR	1xTMT6plex [N-Term]	2.69148e-06	0	1	2	2	A2A274	0	1896.93	High	High	High	High	High	High	High	High	High	70.5	4.7	65.9	45.7	80.3	89	57.3	38.9	62.3	Unique	57.85	High	0	2.993e-06
FALSE	High	WMVAGLGNPGLPGTR	1xTMT6plex [N-Term]	1.55385e-07	0	1	4	1	Q86Y79	0	1754.96	High	High	High	High	High	High	High	High	High	87.4	1.3	36.5	38.4	73.4	67.1	52.6	37.5	51	Unique	96.96	High	0	1.867e-07
FALSE	High	RPDTSFLWFTSPYK	2xTMT6plex [N-Term; K14]	0.000112884	0	1	14	1	O75923-8	0	2203.2	High	Not Found	High	High	High	High	High	High	High	98.7		93.3	125.6	160	93.8	98.6	106.1	79.1	Unique	32.15	High	0	0.0001148
FALSE	High	NLEPVSWSSLNPK	2xTMT6plex [N-Term; K13]	4.57844e-06	0	1	1	1	P98172	0	1929.08	High	Not Found	High	High	High	High	High	High	High	14.9		2.5	3.2	10.2	7.1	5.7	2.4	1.9	Unique	54.73	High	0	5.052e-06
FALSE	High	DVEDEILWVGER	1xTMT6plex [N-Term]	2.28975e-05	0	2	4	2	Q01082; Q01082-3	0	1688.87	High	High	High	High	High	High	High	High	High	264.2	5.1	109.6	95.9	105.3	133.7	104.6	62.1	105.6	NotUnique	83.27	High	0	2.419e-05
FALSE	High	SSILLDVKPWDDETDMAK	3xTMT6plex [N-Term; K8; K18]	1.56812e-06	0	1	1	3	P24534	0	2750.49	High	Not Found	High	High	High	High	High	High	High	648.5		197	148.8	339.4	308.5	258.6	162.2	186	Unique	51.11	High	0	2.225e-05
FALSE	High	KLGIPATIVLPESTSLQVVQR	2xTMT6plex [N-Term; K1]	9.8883e-06	0	1	2	1	Q96GA7	1	2707.65	High	Not Found	High	High	High	High	High	High	High	21.6		23.6	10.2	6.5	27.7	8.6	6.2	9.9	Unique	61.04	High	0	1.07e-05
FALSE	High	KLEAELLQIEER	2xTMT6plex [N-Term; K1]	1.85243e-05	0	1	10	1	Q969G3	1	1929.14	High	High	High	High	High	High	High	High	High	131.5	0.7	20.2	103.4	65.4	84.9	59.9	40.6	59.4	Unique	49.07	High	0	1.975e-05
FALSE	High	QQAAYYAQTSPQGMPQHPPAPQGQ	1xTMT6plex [N-Term]	1.01603e-06	0	1	1	1	Q96AE4	0	2810.35	High	Not Found	High	High	High	High	High	High	High	31.3		7.7	21.5	16.5	21.9	18.4	20.6	18.9	Unique	77.67	High	0	1.158e-06
FALSE	High	HLPGADPELVLLGR	1xTMT6plex [N-Term]	9.98189e-07	0	1	2	1	Q8WWX9	0	1716	High	High	High	High	High	High	High	High	High	139.6	7.6	37.1	36.1	91.4	27.6	55.1	27.3	23.3	Unique	67.38	High	0	1.139e-06
FALSE	High	KELIEELIAK	3xTMT6plex [N-Term; K1; K10]	5.10314e-05	0	1	3	1	P78316	1	1873.2	High	Not Found	High	High	High	High	High	High	High	157.4		15.6	107.2	69.8	62.1	95.5	71.6	59	Unique	34.28	High	0	5.297e-05
FALSE	High	DAGEGLLAVQITDPEGKPK	3xTMT6plex [N-Term; K17; K19]	1.92046e-09	0	2	5	2	P21333-2; Q60FE5	0	2625.51	High	Not Found	High	High	High	High	High	High	High	937.8		633.6	318.3	435.6	695.5	321	187.3	349.9	NotUnique	93.08	High	0	2.574e-09
FALSE	High	KLQAVLEDTLLK	3xTMT6plex [N-Term; K1; K12]	2.69148e-06	0	1	1	1	Q7Z3E2	1	2058.31	High	Not Found	High	High	High	High	High	High	High	115.4		58.6	63.5	86.1	72.2	101.9	70.5	60.6	Unique	63.2	High	0	3.01e-06
FALSE	High	IDSRLEQYTSAIEGTK	2xTMT6plex [N-Term; K16]	1.28931e-05	0	2	9	1	Q05682-4; Q05682-2	1	2269.24	High	Not Found	High	High	High	High	High	High	High	56.2		56	61.8	137.6	136.5	99	75.4	53.4	NotUnique	39.9	High	0	1.377e-05
FALSE	High	QWNNCAFLESSAK	2xTMT6plex [N-Term; K13]; 1xCarbamidomethyl [C5]	5.32237e-07	0	2	10	2	F5GZG1; P61224	0	2013.03	High	Not Found	High	High	High	High	High	High	High	137.3		71.8	59	81	98.6	72.4	48.5	75.5	NotUnique	78.73	High	0	6.185e-07
FALSE	High	VTDISGGCGAMYEIK	2xTMT6plex [N-Term; K15]; 1xCarbamidomethyl [C8]	3.73454e-07	0	1	1	1	Q53S33	0	2059.06	High	Not Found	High	High	High	High	High	High	High	50.4		30.4	22.8	40.7	37.5	31.9	22.6	37.5	Unique	55.87	High	0	4.357e-07
FALSE	High	LLEAGNFICQALNR	1xTMT6plex [N-Term]; 1xCarbamidomethyl [C9]	4.61911e-07	0	1	4	2	P35914	0	1848	High	High	High	High	High	High	High	High	High	143.2	4.8	98.9	79.2	98.1	130.2	75.8	54.3	99.6	Unique	52.97	High	0	5.379e-07
FALSE	High	LAPITYPQGLALAK	2xTMT6plex [N-Term; K14]	2.24968e-05	0	1	4	3	B1AH77	0	1914.18	High	Not Found	High	High	High	High	High	High	High	580.2		282.4	223.2	302.9	393.5	301.3	219	222	Unique	45.42	High	0	2.371e-05
FALSE	High	TSFPEDTVITYK	2xTMT6plex [N-Term; K12]	3.86954e-06	0	1	11	1	P08174-7	0	1859.02	High	Not Found	High	High	High	High	High	High	High	172.4		12.4	43.3	89	36.2	129.8	75	12.7	Unique	81.72	High	0	4.267e-06
FALSE	High	DSTDISAVLGTK	2xTMT6plex [N-Term; K12]	4.16932e-05	0	1	5	1	O75410-2	0	1664.95	High	Not Found	High	High	High	High	High	High	High	75.5		63.5	22.7	30.9	71.5	34	23	37.5	Unique	48.43	High	0	4.338e-05
FALSE	High	ELIRDEGVTSLYK	2xTMT6plex [N-Term; K13]	1.98807e-05	0	1	2	1	O43772	1	1981.14	High	Not Found	High	High	High	High	High	High	High	104.9		54.4	53.2	69.8	81.4	50.8	28.3	59.2	Unique	40.1	High	0	2.114e-05
FALSE	High	YLQTLTTIAAEK	2xTMT6plex [N-Term; K12]	4.92703e-05	0	1	2	3	P27105	0	1810.07	High	Not Found	High	High	High	High	High	High	High	654.4		495.6	229.9	545.7	1047.3	707.3	544.9	909.9	Unique	42.84	High	0	5.111e-05
FALSE	High	LYLNSNKLDFDGLPSGIGK	3xTMT6plex [N-Term; K7; K19]	1.88865e-06	0	1	5	1	Q13045	1	2738.57	High	Not Found	High	High	High	High	High	High	High	107.5		231.8	99.8	169.2	288.1	200.3	118.3	147.2	Unique	49.16	High	0	2.116e-06
FALSE	High	QVFHALEDELQK	2xTMT6plex [N-Term; K12]	2.09625e-05	0	2	10	1	Q03001; F6QMI7	0	1915.07	High	Not Found	High	High	High	High	High	High	High	123.8		105	76.3	89.3	147.6	99.3	63.3	110.3	NotUnique	37.06	High	0	2.212e-05
FALSE	High	SVSIGYLLVK	2xTMT6plex [N-Term; K10]	2.31005e-05	0	1	1	2	P08572	0	1536.98	High	Not Found	High	High	High	High	High	High	High	205.9		6.1	91.3	173.6	67.6	164.3	69.5	60.4	Unique	79.74	High	0	2.441e-05
FALSE	High	LQEEHSLQDVIFK	2xTMT6plex [N-Term; K13]	7.45207e-07	0	1	6	1	A0A087WU02	0	2044.15	High	Not Found	High	High	High	High	High	High	High	447.7		118.2	196.6	283.6	125.7	312	157.6	103.6	Unique	46.51	High	0	8.611e-07
FALSE	High	AQESVGIYEVTHQFVK	2xTMT6plex [N-Term; K16]	1.79091e-06	0	1	1	1	Q9NWV4	0	2293.26	High	Not Found	High	High	High	High	High	High	High	28.9		41.2	16.8	26.1	48.6	19.4	15.5	30.4	Unique	38.99	High	0	2.02e-06
FALSE	High	VTFSEDDEIINPEDVDPSVGR	1xTMT6plex [N-Term]	2.09991e-07	0	1	3	1	Q12972	0	2562.24	High	High	High	High	High	High	High	High	High	30.7	1.9	32.3	22.4	20.7	27	23.2	14.8	15	Unique	59.29	High	0	2.494e-07
FALSE	High	KDVIELTDDSFDK	3xTMT6plex [N-Term; K1; K13]	3.60493e-06	0	1	5	1	Q15084-2	1	2212.23	High	High	High	High	High	High	High	High	High	559.3	2.8	113.6	128.8	124.6	99.7	148.2	96.5	89.7	Unique	68.95	High	0	3.971e-06
FALSE	High	GPPPSWASEPERPSILSASELK	2xTMT6plex [N-Term; K22]	1.83613e-05	0	2	9	1	Q9Y520-7; E7EPN9	0	2793.52	High	Not Found	High	High	High	High	High	High	High	160.4		59.6	82.7	77.5	61.4	107	85.6	66.4	NotUnique	34.73	High	0	1.945e-05
FALSE	High	KNFESLSEAFSVASAAAVLSHNR	2xTMT6plex [N-Term; K1]	2.02451e-10	0	2	5	2	P04844; P04844-2	1	2893.56	High	Not Found	High	High	High	High	High	High	High	517.8		152.8	265.8	303.3	152.9	289.9	180.6	141.9	NotUnique	70.35	High	0	2.863e-10
FALSE	High	AILILDNDGDR	1xTMT6plex [N-Term]	0.000109991	0	1	10	1	F8VVA7	0	1443.8	High	High	High	High	High	High	High	High	High	142.5	14.3	79.5	60	55.6	106.3	60.2	42.4	55.9	Unique	90.73	High	0	0.000112
FALSE	High	NCASPSSAGQLILPECMK	2xTMT6plex [N-Term; K18]; 2xCarbamidomethyl [C2; C16]	6.93455e-05	0	1	3	1	P53992	0	2421.23	High	Not Found	High	High	High	High	High	High	High	352.4		78	72.4	197.1	135.8	157.8	133.7	116.1	Unique	46.36	High	0	7.148e-05
FALSE	High	KIYEIYSDFALK	3xTMT6plex [N-Term; K1; K12]	2.2299e-05	0	1	5	1	Q9Y296	1	2177.28	High	Not Found	High	High	High	High	High	High	High	174		98.3	103.2	101.6	124.7	73.9	68.6	67.6	Unique	52.01	High	0	2.367e-05
FALSE	High	WFSIQNNQLVYQK	2xTMT6plex [N-Term; K13]	6.755e-05	0	1	4	1	Q15057	0	2126.18	High	Not Found	High	High	High	High	High	High	High	119.9		67.3	53.7	75.9	134.1	84.4	47.8	65.7	Unique	35.49	High	0	6.978e-05
FALSE	High	VSVPSNLSYGEWLHGFEK	3xTMT6plex [N-Term; S2; K18]	2.23474e-06	0	1	7	1	Q86UP2	0	2736.5	High	Not Found	High	High	High	High	High	High	High	159.1		66	73.8	144.1	159.8	153.3	92.4	149.3	Unique	54.15	High	0	2.495e-06
FALSE	High	VSVPSNLSYGEWLHGFEK	2xTMT6plex [N-Term; K18]	1.28963e-08	0	1	7	4	Q86UP2	0	2507.33	High	Not Found	High	High	High	High	High	High	High	566.6		322	289.7	420.2	472.5	480.4	263.4	451.6	Unique	90.37	High	0	6.302e-08
FALSE	High	GANAVGYTNYPDNVVFK	2xTMT6plex [N-Term; K17]	2.52919e-07	0	1	1	1	P11498	0	2287.21	High	Not Found	High	High	High	High	High	High	High	7.6		2.1	1.6	10	8.1	12	2.6	3.3	Unique	78.43	High	0	2.987e-07
FALSE	High	HIPGAAFFDIDQCSDR	1xTMT6plex [N-Term]; 1xCarbamidomethyl [C13]	7.58525e-07	0	1	3	2	P25325-2	0	2078	High	High	High	High	High	High	High	High	High	145.1	1.2	73.8	59.5	91.2	111.2	84.9	52.2	67.8	Unique	76.04	High	0	2.395e-06
FALSE	High	SMIASTAITVHYLDLSLNPSGEVTR	1xTMT6plex [N-Term]	1.33614e-08	0	1	3	1	Q13740-2	0	2904.53	High	High	High	High	High	High	High	High	High	75.8	5.5	32.4	49	55.7	18.2	53.2	44.8	21.6	Unique	56.11	High	0	1.7e-08
FALSE	High	FKLEWLGNCSGLNDETYGYK	3xTMT6plex [N-Term; K2; K20]; 1xCarbamidomethyl [C9]	5.50608e-11	0	1	3	1	P05026	1	3081.6	High	Not Found	High	High	High	High	High	High	High	7.1		1.7	3.7	3.7	7.4	8	9.8	3.4	Unique	107.17	High	0	8.064e-11
FALSE	High	QLLHLCLQDGGSPPGPGDLAEER	1xTMT6plex [N-Term]; 1xCarbamidomethyl [C6]	5.86703e-07	0	1	2	2	Q96FS4	0	2688.36	High	Not Found	High	High	High	High	High	High	High	29.2		21	13.8	20.9	31.2	15.2	10.9	11.9	Unique	75.82	High	0	6.775e-07
FALSE	High	VCNALALLQCVASHPETR	1xTMT6plex [N-Term]; 2xCarbamidomethyl [C2; C10]	7.99352e-09	0	1	3	1	Q92600	0	2268.18	High	High	High	High	High	High	High	High	High	104.1	1.1	29.4	50.4	74.9	53.9	68.7	49.7	52.9	Unique	59.98	High	0	1.028e-08
FALSE	High	AYGDFAWSNPLHPDIFPGLR	1xTMT6plex [N-Term]	6.81892e-06	0	1	3	1	O95470	0	2502.28	High	High	High	High	High	High	High	High	High	47.1	3.3	35.6	38.6	30.6	31.1	35.9	25.5	35.3	Unique	37.81	High	0	7.434e-06
FALSE	High	KYLLGVQPAWGSAEAVDIDR	2xTMT6plex [N-Term; K1]	5.9104e-11	0	1	2	2	Q10713	1	2646.47	High	High	High	High	High	High	High	High	High	544.3	7.8	291.7	279.8	523.1	462.1	423.9	270.1	347	Unique	122.58	High	0	8.637e-11
FALSE	High	ELAAQLALSQAQLEVHQGEVQR	1xTMT6plex [N-Term]	1.347e-10	0	1	2	1	Q9BQS8-4	0	2647.44	High	Not Found	High	High	High	High	High	High	High	24.9		8.5	5.9	17.5	18.7	17.4	14.1	9.1	Unique	80.11	High	0	1.935e-10
FALSE	High	GIGDPLVSVYAR	1xTMT6plex [N-Term]	6.29827e-05	0	1	8	1	E7EWW0	0	1475.84	High	High	High	High	High	High	High	High	High	71.6	13.8	57.8	43.5	51.7	70	57.3	37.5	46.2	Unique	71.35	High	0	6.513e-05
FALSE	High	ATLVESSTSGFTPGGGGSSVSMIASR	1xTMT6plex [N-Term]	1.69713e-08	0	1	6	1	P49321-3	0	2672.34	High	High	High	High	High	High	High	High	High	10.8	1.3	9.4	8.8	6.8	14.4	10.5	7.7	10.9	Unique	70.25	High	0	2.154e-08
FALSE	High	YYVAMDFQAK	2xTMT6plex [N-Term; K10]	6.99544e-05	0	1	5	1	Q6P179	0	1693.9	High	High	High	High	High	High	High	High	High	205.7	2.1	60.2	122.7	204.6	92.1	153.3	84.2	52.1	Unique	50.17	High	0	7.182e-05
FALSE	High	ATVAPEDVSEVIFGHVLAAGCGQNPVR	2xTMT6plex [N-Term; S9]; 1xCarbamidomethyl [C21]	2.7077e-05	0	1	2	1	Q9BWD1	0	3251.72	High	Not Found	High	High	High	High	High	High	High	92.4		42.8	32.8	63.3	134.5	54.9	54.3	49.1	Unique	35.39	High	0	2.858e-05
FALSE	High	ATVAPEDVSEVIFGHVLAAGCGQNPVR	1xTMT6plex [N-Term]; 1xCarbamidomethyl [C21]	1.20223e-06	0	1	2	1	Q9BWD1	0	3022.56	High	High	High	High	High	High	High	High	High	33	2.2	25.9	19.7	19.8	34.6	17.3	18.3	14.7	Unique	69.74	High	0	1.364e-06
FALSE	High	VYVIGSFVDK	2xTMT6plex [N-Term; K10]	9.40899e-05	0	1	1	1	Q7L0Y3	0	1584.94	High	Not Found	High	High	High	High	High	High	High	250.9		108.5	133.6	187.7	162.1	169.9	114.5	154.9	Unique	39.32	High	0	9.632e-05
FALSE	High	TAHLDEEVNKGDILVVATGQPEMVK	3xTMT6plex [N-Term; K10; K25]	1.3011e-08	0	1	2	1	P11586	1	3380.87	High	Not Found	High	High	High	High	High	High	High	107.5		72.3	60.7	75.5	82.8	103.6	65.2	59.4	Unique	51.16	High	0	1.655e-08
FALSE	High	NILQLHDLTTGALLK	2xTMT6plex [N-Term; K15]	6.24336e-05	0	1	1	1	P48147	0	2108.28	High	Not Found	High	High	High	High	High	High	High	134.9		93.7	46.8	68.8	183.2	47	62.2	85.5	Unique	44.92	High	0	6.421e-05
FALSE	High	DSFSDPYAIVSFLHQSQK	3xTMT6plex [N-Term; S16; K18]	0.000112884	0	1	15	1	O75923-8	0	2756.49	High	Not Found	High	High	High	High	High	High	High	201		130	139.9	66.9	83.8	65.4	50.3	92	Unique	29.22	High	0	0.0001151
FALSE	High	TTDLSIQPLSADVK	2xTMT6plex [N-Term; K14]	4.04444e-07	0	1	2	1	Q8IVF2	0	1946.12	High	Not Found	High	High	High	High	High	High	High	117.2		60.7	44.6	78.9	98.5	57.8	42.9	86.7	Unique	73.83	High	0	4.719e-07
FALSE	High	ITVYEALNHPWLK	2xTMT6plex [N-Term; K13]	5.36936e-06	0	1	6	1	O14936	0	2042.18	High	Not Found	High	High	High	High	High	High	High										NoQuanValues	38.73	High	0	5.864e-06
FALSE	High	IAKEEIFGPVQQIMK	3xTMT6plex [N-Term; K3; K15]	7.99655e-08	0	1	1	1	P00352	1	2418.44	High	Not Found	High	High	High	High	High	High	High	59.3		129.4	26.5	44.9	89.9	328.6	221.6	136.7	Unique	55.94	High	0	9.736e-08
FALSE	High	IQFGNSFSNSEALR	1xTMT6plex [N-Term]	2.99274e-07	0	1	1	1	Q16602	0	1798.93	High	Not Found	High	High	High	High	High	High	High	39.1		14.5	21.6	32.4	20.4	46.3	30.7	14.9	Unique	112.13	High	0	3.525e-07
FALSE	High	IQFGNSFSNSEALR	1xTMT6plex [N-Term]; 1xDeamidated [N5]	3.65373e-05	0	1	1	1	Q16602	0	1799.91	High	High	High	High	High	High	High	High	High	7.5	2.1	9.7	11.5	5.7	5.6	9.9	5.8	2.7	Unique	31.53	High	0	3.805e-05
FALSE	High	KTVLGTPEVLLGALPGAGGTQR	2xTMT6plex [N-Term; K1]	8.20878e-09	0	1	1	2	P40939	1	2593.54	High	High	High	High	High	High	High	High	High	413.9	3.9	320.4	246.4	439	483.2	378.8	229.3	321	Unique	93.08	High	0	1.061e-08
FALSE	High	SPASDTYIVFGEAK	2xTMT6plex [N-Term; K14]	0.000119924	0	1	8	2	E9PAV3	0	1943.05	High	High	High	High	High	High	High	High	High	328	2.7	134.5	132	209.3	208.3	274.9	203.5	161.6	Unique	40.92	High	0	0.000122
FALSE	High	SPASDTYIVFGEAK	3xTMT6plex [N-Term; K14; S]	9.8883e-06	0	1	8	2	E9PAV3	0	2172.22	High	Not Found	High	High	High	High	High	High	High	176.4		25.6	31.1	143.9	138.4	145.8	157	88.5	Unique	35.03	High	0	1.065e-05
FALSE	High	IFLEESLSFGVLGEHGR	2xTMT6plex [N-Term; S8]	1.69823e-06	0	1	1	1	O15269	0	2348.3	High	Not Found	High	High	High	High	High	High	High	73.1		27	25.3	53.5	60.5	46.6	30.1	52.5	Unique	38.69	High	0	1.916e-06
FALSE	High	ERPPTVIMDLIQR	1xTMT6plex [N-Term]	6.1318e-06	0	2	4	1	Q9UL54; Q9UL54-2	0	1797.03	High	Not Found	High	High	High	High	High	High	High	57.9		42.6	40.7	56.5	62.5	49.3	28.2	38.4	NotUnique	47.48	High	0	6.716e-06
FALSE	High	LVHLQTLVLNGNPLLHAQLR	1xTMT6plex [N-Term]; 1xDeamidated [N10]	5.22705e-08	0	1	7	2	Q13045	0	2479.47	High	High	High	High	High	High	High	High	High	73.4	1.3	75	40.8	46.2	77.9	40.7	30.6	47.2	Unique	65.75	High	0	6.452e-08
FALSE	High	GGPAEGQLQENDR	1xTMT6plex [N-Term]	8.07042e-07	0	2	7	1	G3V1L9; G5E9E7	0	1599.79	High	High	High	High	High	High	High	High	High	99.1	20.4	80.1	51.9	52.5	80.9	80.1	46.1	49.5	NotUnique	93.41	High	0	9.259e-07
FALSE	High	ILAPGEEENLEFEEDEEEGGAGAGSPDSFPAR	1xTMT6plex [N-Term]	4.87115e-06	0	1	2	1	Q96BJ3	0	3577.63	High	Not Found	High	High	High	High	High	High	High	11.9		18.6	7.8	9.5	15.8	5.6	5.4	8	Unique	77.67	High	0	5.346e-06
FALSE	High	VIHVVTSEMDNYEPGVYTEK	2xTMT6plex [N-Term; K20]	1.21255e-07	0	1	4	4	P35221	0	2768.42	High	High	High	High	High	High	High	High	High	714.5	6.6	190.2	375.1	471.7	180.7	551.8	321.5	127.8	Unique	96.6	High	0	1.465e-07
FALSE	High	LKIPEGLFDPSNVK	3xTMT6plex [N-Term; K2; K14]	2.00943e-06	0	1	2	1	O96019	1	2244.36	High	Not Found	High	High	High	High	High	High	High	110.1		63.9	85.9	74.1	121	81.1	57.9	73.9	Unique	34.81	High	0	2.249e-06
FALSE	High	IDTRNELESYAYSLK	2xTMT6plex [N-Term; K15]	7.45207e-07	0	1	1	2	P11021	1	2260.22	High	High	High	High	High	High	High	High	High	127.2	1.8	75.7	61.1	731	120.7	840.7	224.2	44.8	Unique	62.84	High	0	8.569e-07
FALSE	High	HEALLYTWLAEHKPLVLCGPPGSGK	3xTMT6plex [N-Term; K13; K25]; 1xCarbamidomethyl [C18]	1.29051e-06	0	1	1	2	Q14204	0	3460.94	High	Not Found	High	High	High	High	High	High	High	65.6		22	27.9	78.5	37.6	31.4	30.2	35.9	Unique	34.07	High	0	1.462e-06
FALSE	High	QREEYQPATPGLGMFVEVK	2xTMT6plex [N-Term; K19]	3.79702e-10	0	1	1	1	Q9BVK6	1	2637.41	High	Not Found	High	High	High	High	High	High	High	186.6		34.1	51.2	60.9	41.5	65.6	36.4	38.2	Unique	73.36	High	0	5.293e-10
FALSE	High	NFQNIFPPSATLHLSNIPPSVSEEDLK	3xTMT6plex [N-Term; K27; S/T]	7.51614e-06	0	1	6	4	A6NLN1	0	3682.01	High	High	High	High	High	High	High	High	High	180	2.2	60	90	77.2	83.3	109.7	64.9	81.4	Unique	50.71	High	0	8.185e-06
FALSE	High	IEGVYARDETEFYLGK	2xTMT6plex [N-Term; K16]	2.94068e-06	0	1	4	1	P18077	1	2348.25	High	Not Found	High	High	High	High	High	High	High	16.8		22.2	13.9	68.5	37.1	98.4	35	19.8	Unique	47.85	High	0	3.258e-06
FALSE	High	QLISQIGNAMGYVR	1xTMT6plex [N-Term]	1.21255e-07	0	1	2	1	A0A087X256	0	1778.98	High	High	High	High	High	High	High	High	High	14.2	1.8	6	6.9	8.2	11.7	9.5	2.8	2.9	Unique	85.22	High	0	1.467e-07
FALSE	High	CPSIAAAIAAVNALHGR	1xTMT6plex [N-Term]; 1xCarbamidomethyl [C1]	1.74349e-07	0	1	3	2	Q14498	0	1921.06	High	Not Found	High	High	High	High	High	High	High	144.6		56.7	101.1	181.7	159.1	224	140.6	100.2	Unique	67.01	High	0	2.09e-07
FALSE	High	SSTTTCPEQDFFGGNFEDPVLDGPPQDDLSHPR	1xTMT6plex [N-Term]; 1xCarbamidomethyl [C6]	8.88658e-10	0	1	4	1	Q8N264	0	3891.76	High	Not Found	High	High	High	High	High	High	High	3.8		5.8	2.6	2.4	3	3.8	2	3.7	Unique	50.53	High	0	1.212e-09
FALSE	High	GMLREDAVLEYLK	2xTMT6plex [N-Term; K13]	6.18892e-05	0	1	1	4	P26038	1	1995.13	High	Not Found	High	High	High	High	High	High	High	165.6		312.9	180.3	254.2	322.6	302.2	189.2	150.1	Unique	42	High	0.0001042	0.0004044
FALSE	High	CSATGSPTPTLEWTGGPGGQLPAK	2xTMT6plex [N-Term; K24]; 1xCarbamidomethyl [C1]	1.46044e-07	0	1	1	1	P98160	0	2828.47	High	Not Found	High	High	High	High	High	High	High										NoQuanValues	50.83	High	0	1.748e-07
FALSE	High	GDLDIAGPNLEGDFKGPK	3xTMT6plex [N-Term; K15; K18]	2.08189e-06	0	1	1	1	Q09666	1	2530.41	High	Not Found	High	High	High	High	High	High	High	68.9		167.2	131.3	197	205.8	224.9	133.5	137.2	Unique	46.29	High	0	2.34e-06
FALSE	High	VNVTVDYIRPASPATETVPAFSER	1xTMT6plex [N-Term]	2.27331e-08	0	1	1	3	Q7KZF4	0	2848.5	High	High	High	High	High	High	High	High	High	82.6	1.3	34.7	43.5	61.8	55.9	82.9	39	39.8	Unique	72.5	High	0	2.857e-08
FALSE	High	KYLAEIVLIDDFSNKEHLK	4xTMT6plex [N-Term; K1; K15; K19]	3.03659e-05	0	2	3	1	E9PBY3; Q86SF2	2	3191.88	High	Not Found	High	High	High	High	High	High	High	118		45.8	113.1	158.5	56.1	151.5	79.5	41	NotUnique	38.72	High	0	3.182e-05
FALSE	High	ILLLGEAQVGK	2xTMT6plex [N-Term; K11]	6.07776e-06	0	1	6	2	Q8IXI1	0	1599.02	High	Not Found	High	High	High	High	High	High	High	441.8		234.8	253.3	332.2	352.4	301.5	166.7	252.7	Unique	67.22	High	0	6.622e-06
FALSE	High	VLYNDLGAQVTEGKQDLER	2xTMT6plex [N-Term; K14]	1.63688e-05	0	1	2	1	P46939	1	2606.42	High	Not Found	High	High	High	High	High	High	High	2.8		9.8	5.5	20.7	11.7	21.5	7.5	6.6	Unique	36.74	High	0	1.747e-05
FALSE	High	SAEFLLHMLK	2xTMT6plex [N-Term; K10]	0.000102625	0	1	12	3	P18621-3	0	1646.97	High	High	High	High	High	High	High	High	High	822.7	3.4	226.2	500.4	534.4	292.3	531	403.1	333.5	Unique	33.99	High	0	0.0001048
FALSE	High	LVTSIGDVVNHDPVVGDR	1xTMT6plex [N-Term]	5.18096e-08	0	1	2	1	P11216	0	2121.15	High	High	High	High	High	High	High	High	High										NoQuanValues	53.95	High	0	6.388e-08
FALSE	High	MQEDLVTLAK	2xTMT6plex [N-Term; K10]	0.00013647	0	2	6	1	P54289-4; P54289	0	1605.93	High	Not Found	High	High	High	High	High	High	High	222.7		53.2	90.7	120.9	74.4	131.7	74.5	34.7	NotUnique	49.01	High	0	0.0001388
FALSE	High	IAENNDLLWMDYHQK	2xTMT6plex [N-Term; K15]	4.30313e-07	0	1	11	1	O00499-2	0	2348.21	High	Not Found	High	High	High	High	High	High	High	102.2		74.4	63.1	63.1	109.5	75.8	52.2	53.5	Unique	54.98	High	0	5.015e-07
FALSE	High	LLEVNQQSLLGLTHGEAVQLLR	2xTMT6plex [N-Term; S8]	4.30313e-07	0	1	7	1	A0A0G2JPP5	0	2889.69	High	Not Found	High	High	High	High	High	High	High	206.5		85.4	92.2	165.8	224.2	173.2	121	148.2	Unique	50.28	High	0	5.001e-07
FALSE	High	LLEVNQQSLLGLTHGEAVQLLR	1xTMT6plex [N-Term]	1.87081e-08	0	1	7	1	A0A0G2JPP5	0	2660.53	High	High	High	High	High	High	High	High	High	81.1	8.5	83.7	65.5	47.1	61.2	56.5	31.1	53.7	Unique	87.23	High	0	2.36e-08
FALSE	High	APNISMPDVDLNLK	2xTMT6plex [N-Term; K14]	8.35821e-06	0	1	1	2	Q09666	0	1985.11	High	Not Found	High	High	High	High	High	High	High	580.9		318.6	297.6	244.5	355	305.8	223.5	308.1	Unique	37.97	High	0.0006709	0.005182
FALSE	High	IYSFNSTNDSSGPANLDK	2xTMT6plex [N-Term; K18]	1.69578e-05	0	1	2	1	A0A087WYN9	0	2388.21	High	Not Found	High	High	High	High	High	High	High	122.4		43.2	47.2	77	73.1	96.2	72.8	60.3	Unique	54.24	High	0	1.8e-05
FALSE	High	SQEMVMEQAIPPDSVETPTDSETDGSTPVADFDAPGTTQK	2xTMT6plex [N-Term; K40]	2.35669e-06	0	1	3	1	Q02952	0	4667.19	High	Not Found	High	High	High	High	High	High	High	34.3		25.8	7.9	6.2	12.2	8.6	2.3	8.6	Unique	76.28	High	0	2.646e-06
FALSE	High	QQGLVDGLFLLR	1xTMT6plex [N-Term]	3.93868e-06	0	1	4	1	Q13322	0	1587.94	High	High	High	High	High	High	High	High	High	89	2	22.7	54.3	68	44.8	90	53.9	29.3	Unique	87.28	High	0	4.362e-06
FALSE	High	LQPTWNDLGDK	2xTMT6plex [N-Term; K11]	0.000103519	0	1	1	1	Q8NBS9	0	1744.96	High	Not Found	High	High	High	High	High	High	High	249.6		48.4	55.1	31.8	28.3	39.2	29.5	31.7	Unique	56.83	High	0	0.0001055
FALSE	High	QKTGLDSPTGIDFSDITANSFTVHWIAPR	3xTMT6plex [N-Term; K2; S20]	5.52247e-05	0	2	14	1	P02751-10; P02751	1	3862.07	High	Not Found	High	High	High	High	High	High	High	63.3		14.5	23.6	94.5	26.1	50.1	34.9	25.3	NotUnique	35.06	High	0	5.722e-05
FALSE	High	THVADFAPEVAWVTR	1xTMT6plex [N-Term]	8.43585e-07	0	1	1	1	P07814	0	1928.02	High	High	High	High	High	High	High	High	High	148.4	2.9	75.3	36.3	62.8	90.6	64.9	55.4	73.4	Unique	81.12	High	0	9.651e-07
FALSE	High	QITSYGETCPGLEQYAIK	2xTMT6plex [N-Term; K18]; 1xCarbamidomethyl [C9]	4.84124e-05	0	1	3	1	P50990	0	2516.31	High	Not Found	High	High	High	High	High	High	High	112.9		69.4	44.4	28	94.8	41.3	32.8	56.8	Unique	53.95	High	0	5.01e-05
FALSE	High	SLPLLLSQAGVR	1xTMT6plex [N-Term]	6.94069e-06	0	1	4	1	P51688	0	1482.92	High	Not Found	High	High	High	High	High	High	High	46.2		30.3	19.1	64.8	60.2	39.1	19.5	28.1	Unique	54.97	High	0	7.583e-06
FALSE	High	LPFAAAQIGNSFR	1xTMT6plex [N-Term]; 1xDeamidated [N10]	3.8519e-05	0	1	1	1	P41250	0	1621.89	High	Not Found	High	High	High	High	High	High	High	16.2		2	8.4	14.7	8.8	10.4	6.5	3.3	Unique	49.79	High	0	4.002e-05
FALSE	High	LPFAAAQIGNSFR	1xTMT6plex [N-Term]	1.07148e-06	0	1	1	1	P41250	0	1620.91	High	High	High	High	High	High	High	High	High	37.2	1.7	31.2	22.5	30.5	46.9	21.5	17.7	18.1	Unique	72.69	High	0	1.224e-06
FALSE	High	MIKNEVDMQVLHLLGPK	3xTMT6plex [N-Term; K3; K17]	8.50744e-06	0	1	12	1	P47897	1	2652.55	High	Not Found	High	High	High	High	High	High	High	143.5		232.5	129.3	265.8	294.2	263.3	176.3	169.4	Unique	35.37	High	0	9.197e-06
FALSE	High	EPSYFEIPTK	2xTMT6plex [N-Term; K10]	6.81433e-05	0	3	8	1	Q5SW79; J3KQR7; Q5SW79-2	0	1668.92	High	High	High	High	High	High	High	High	High	83.1	1.6	61.2	47.6	48.7	59	60.2	40.1	40.1	NotUnique	54.36	High	0	7.006e-05
FALSE	High	AVAFSPVTELK	2xTMT6plex [N-Term; K11]	1.34759e-05	0	1	2	1	P17858	0	1619.98	High	Not Found	High	High	High	High	High	High	High	118.2		82.1	38.1	29.8	99.4	32.8	28.5	45.1	Unique	59	High	0	1.438e-05
FALSE	High	NIPMKPPTPLLNTTSSLSGYPLGR	2xTMT6plex [N-Term; K5]	6.58301e-07	0	2	6	1	Q86SQ0; Q86SQ0-3	0	3012.7	High	Not Found	High	High	High	High	High	High	High	19.6		8.5	2.4	5.9	20.1	7.3	6.5	12	NotUnique	63.43	High	0	7.608e-07
FALSE	High	GSVYIGGAPDVATLTGGR	1xTMT6plex [N-Term]	2.69097e-07	0	1	1	1	P98160	0	1920.04	High	High	High	High	High	High	High	High	High	112.8	2.9	10.8	53.7	84.9	20.9	102.4	57	22.9	Unique	69.37	High	0	3.171e-07
FALSE	High	DVQIGDIVTVGECRPLSK	2xTMT6plex [N-Term; K18]; 1xCarbamidomethyl [C13]	3.70161e-07	0	1	2	4	P62280	0	2444.36	High	Not Found	High	High	High	High	High	High	High	156.5		70	107.9	159.8	92.2	171.5	117.9	83.3	Unique	55.49	High	0	4.329e-07
FALSE	High	ISSLLEEQFQQGK	2xTMT6plex [N-Term; K13]	8.25738e-05	0	1	2	5	P62241	0	1965.11	High	Not Found	High	High	High	High	High	High	High	503.1		184.5	207.2	348.6	265.1	452.7	313.1	236.1	Unique	38.16	High	0.0002191	0.001022
FALSE	High	SAPDISFTIDANK	2xTMT6plex [N-Term; K13]	4.38018e-06	0	1	17	1	Q9Y4J8	0	1837.01	High	Not Found	High	High	High	High	High	High	High	14.1		7.8	9.4	6.7	11.5	8.8	6.1	6.1	Unique	69.27	High	0	4.807e-06
FALSE	High	LQPTWNDLGDK	2xTMT6plex [N-Term; K11]; 1xDeamidated [N6]	2.7077e-05	0	1	1	1	Q8NBS9	0	1745.95	High	Not Found	High	High	High	High	High	High	High	356.2		65	68.6	69.2	48.4	60.5	46.4	45.8	Unique	58.14	High	0	2.849e-05
FALSE	High	EKPSYDTETDPSEGLMNVLK	3xTMT6plex [N-Term; K2; K20]	1.78908e-09	0	1	2	1	Q9HB71	0	2940.55	High	Not Found	High	High	High	High	High	High	High	158		169.5	133	113.7	225	197.7	132.8	154.5	Unique	101.79	High	0	2.403e-09
FALSE	High	EIEQEAAVELSQLR	1xTMT6plex [N-Term]	8.13925e-06	0	1	1	2	P47985	0	1844	High	High	High	High	High	High	High	High	High	645.3	11	162.3	232.5	177.8	239.2	197.4	133.6	216.4	Unique	43.68	High	0	8.809e-06
FALSE	High	AVQTRPVLQPQPGSLNSSIWDGSEVLR	1xTMT6plex [N-Term]	4.29995e-09	0	1	2	1	Q86TB9	0	3163.71	High	High	High	High	High	High	High	High	High	7.1	1.5	2.4	2.1	6.5	9.3	7.9	3.1	6.3	Unique	108.1	High	0	5.649e-09
FALSE	High	KVQIFEMMDAK	3xTMT6plex [N-Term; K1; K11]	8.62501e-05	0	1	10	1	Q9HC98-2	1	2027.16	High	Not Found	High	High	High	High	High	High	High	57.8		17.6	29.5	41.9	32.3	39.8	31.9	24.6	Unique	32.5	High	0	8.821e-05
FALSE	High	SKELTTEIDNNIEQISSYK	3xTMT6plex [N-Term; K2; K19]	4.2433e-05	0	1	1	1	P13645	1	2899.59	High	Not Found	High	High	High	High	High	High	High	9.5		5.8	11.8	32	10.4	9.5	7.9	11	Unique	61.84	High	0	4.398e-05
FALSE	High	ASVGFGGSCFQK	2xTMT6plex [N-Term; K12]; 1xCarbamidomethyl [C9]	7.38428e-06	0	1	3	1	O60701	0	1702.9	High	Not Found	High	High	High	High	High	High	High	19.1		8.3	7.4	9	14.7	6.8	1.9	6.7	Unique	61.09	High	0	8.047e-06
FALSE	High	NPTDAYQLNYDMHNPFDICAASYRPIYR	1xTMT6plex [N-Term]; 1xCarbamidomethyl [C19]	8.74007e-07	0	1	2	1	P53621	0	3634.7	High	Not Found	High	High	High	High	High	High	High	42.2		29.7	19.5	16.6	22.7	19.6	10.7	17	Unique	40.15	High	0	1.002e-06
FALSE	High	EAMVQAEEAAAEITR	1xTMT6plex [N-Term]	8.43585e-07	0	1	3	1	O00567	0	1847.94	High	Not Found	High	High	High	High	High	High	High	35		6.3	20.5	15.3	26.4	22.7	9.1	14.6	Unique	60.89	High	0	9.697e-07
FALSE	High	RTEPILESPLQR	1xTMT6plex [N-Term]	5.52247e-05	0	1	8	1	Q9UKE5-6	1	1667.96	High	High	High	High	High	High	High	High	High	95.7	1.7	40.7	26.7	39.4	57.9	53.4	35.8	37.4	Unique	53.78	High	0	5.708e-05
FALSE	High	DLIGIDNLVVPGR	1xTMT6plex [N-Term]	9.8883e-06	0	1	3	1	Q9Y4F1	0	1609.95	High	High	High	High	High	High	High	High	High	51.8	2	33.8	30.7	26.3	36.1	29.3	20.8	26.1	Unique	74.37	High	0	1.062e-05
FALSE	High	TAAQCLEHYEFLLDK	2xTMT6plex [N-Term; K15]; 1xCarbamidomethyl [C5]	3.81815e-05	0	1	1	1	Q99459	0	2296.2	High	Not Found	High	High	High	High	High	High	High	225.6		26.4	113	87	107	149.5	98.4	87.1	Unique	45.63	High	0	3.998e-05
FALSE	High	NTIQLPTQPLNSEEWDK	2xTMT6plex [N-Term; K17]	1.75679e-05	0	1	3	1	O15091	0	2471.32	High	Not Found	High	High	High	High	High	High	High	139.3		24.7	21.6	32.2	41.2	43.9	28.3	64.2	Unique	60.52	High	0	1.863e-05
FALSE	High	ATPYNYPVPVRDDGNMPDVPSHPQDPQGPSLEWLK	2xTMT6plex [N-Term; K35]; 1xDeamidated [N15]	6.99544e-05	0	1	2	1	O95167	1	4376.17	High	Not Found	Not Found	High	High	Not Found	High	Not Found	Not Found	1.5			1.5	1.4		2.1			Unique	65.44	High	0	7.191e-05
FALSE	High	LNCQVIGASVDSHFCHLAWVNTPK	2xTMT6plex [N-Term; K24]; 1xDeamidated [N2]; 2xCarbamidomethyl [C3; C15]	4.55248e-05	0	1	2	1	Q06830	0	3212.64	High	High	High	High	High	High	High	High	High	22.8	1.6	80	75.1	17.2	17.1	24	11.3	16.7	Unique	38.52	High	0	4.715e-05
FALSE	High	LNCQVIGASVDSHFCHLAWVNTPK	2xTMT6plex [N-Term; K24]; 2xCarbamidomethyl [C3; C15]	1.83913e-06	0	1	2	2	Q06830	0	3211.65	High	High	High	High	High	High	High	High	High	217.5	11.8	390.5	327.6	95.5	113.9	109.5	71.9	113.2	Unique	60.3	High	0	2.061e-06
FALSE	High	LGASALDSIQEFR	1xTMT6plex [N-Term]	3.93838e-07	0	1	5	1	Q8IY17-4	0	1635.89	High	High	High	High	High	High	High	High	High	120	5.6	63.4	51.7	66	71.8	56.9	29.5	61.6	Unique	79.72	High	0	4.605e-07
FALSE	High	IQYQLVDISQDNALR	1xTMT6plex [N-Term]	6.70066e-07	0	1	2	1	Q9H299	0	2005.09	High	Not Found	High	High	High	High	High	High	High										NoQuanValues	62.8	High	0	7.765e-07
FALSE	High	QTQVSVLPEGGETPLFK	2xTMT6plex [N-Term; K17]	1.07148e-06	0	2	6	1	P06396-2; P06396	0	2288.29	High	Not Found	High	High	High	High	High	High	High	239.5		216.9	61.6	124.7	272.9	82.1	48.9	88.5	NotUnique	47.97	High	0	1.22e-06
FALSE	High	GLEAALVYVENAHVAGK	2xTMT6plex [N-Term; K17]	2.10041e-06	0	1	4	2	Q14008	0	2199.25	High	High	High	High	High	High	High	High	High	242.5	7.2	148.3	155	176.4	166.5	252.8	185	142.8	Unique	49.5	High	0	2.357e-06
FALSE	High	KWISDWNLTTEK	3xTMT6plex [N-Term; K1; K12]	7.06464e-06	0	1	5	1	Q7L2H7	1	2208.26	High	Not Found	High	High	High	High	High	High	High	332.4		178.1	148.1	144.1	149.2	154.6	134.6	137.7	Unique	61.93	High	0	7.672e-06
FALSE	High	QLIEPVQYDEQGMAFSK	2xTMT6plex [N-Term; K17]	9.65749e-05	0	1	1	1	P82933	0	2441.28	High	Not Found	High	High	High	High	High	High	High	48.5		17.6	20.5	55.6	24.7	23.9	16.7	15.2	Unique	71.02	High	0	9.879e-05
FALSE	High	ELENGEVEGEDAFLSSK	2xTMT6plex [N-Term; K17]	7.00407e-07	0	1	3	1	Q86V48	0	2311.17	High	Not Found	Not Found	Not Found	High	Not Found	Not Found	Not Found	Not Found	1.5				3					Unique	73.17	High	0	8.097e-07
FALSE	High	SSPGTQDLLGIQTGMMAPENK	2xTMT6plex [N-Term; K21]	6.755e-05	0	2	4	1	Q5SW79; Q5SW79-2	0	2633.37	High	High	High	High	High	High	High	High	High	43.2	1.1	29.2	23	48.2	44.4	51.1	34.2	27.1	NotUnique	53.09	High	0	6.97e-05
FALSE	High	GVTQEVDGLSQTDGTLTYFDKVDK	3xTMT6plex [N-Term; K21; K24]	5.00225e-06	0	1	6	1	A0A067XG54	1	3303.76	High	Not Found	High	High	High	High	High	High	High	1.9		6.8	6.3	7.7	10.8	8.5	3.2	6.3	Unique	54.87	High	0	5.476e-06
FALSE	High	EGGSIPVTLTFQEATGK	2xTMT6plex [N-Term; K17]	2.41781e-09	0	1	2	1	Q96KP4	0	2193.22	High	Not Found	High	Not Found	High	High	High	High	Not Found	8.3		8.6		6.4	6.5	3.1	2.3		Unique	98.65	High	0	3.229e-09
FALSE	High	NLVEQHIQDIVVHYTFNK	3xTMT6plex [N-Term; T15; K18]	2.64423e-06	0	1	2	2	P04843	0	2884.63	High	High	High	High	High	High	High	High	High	398	1.6	52.5	104	324	129.9	284.4	183.8	108.3	Unique	32.11	High	0	2.943e-06
FALSE	High	NLVEQHIQDIVVHYTFNK	2xTMT6plex [N-Term; K18]	2.0235e-05	0	1	2	2	P04843	0	2655.47	High	High	High	High	High	High	High	High	High	338.6	1.8	116.7	210.3	176.4	79.2	187	109.8	88.5	Unique	42.36	High	0	2.153e-05
FALSE	High	QPAPFSDEIEVDFSKPYVR	2xTMT6plex [N-Term; K15]	5.82077e-05	0	1	7	1	C9JEJ2	0	2682.42	High	Not Found	High	High	High	High	High	High	High	56.8		16.6	23.6	23.8	46.1	32.8	19.9	28.3	Unique	40.93	High	0	6.009e-05
FALSE	High	RDYLLLVMEGTDDGR	1xTMT6plex [N-Term]	1.23423e-07	0	1	3	1	Q9HDC9	1	1982.02	High	High	High	High	High	High	High	High	High	191.2	3	43.8	73.6	108.7	73.5	93.1	59.9	50.6	Unique	72.31	High	0	1.486e-07
FALSE	High	VAGMLQSFQGK	2xTMT6plex [N-Term; K11]	1.66607e-05	0	1	6	1	P28331-2	0	1623.93	High	Not Found	High	High	High	High	High	High	High	125.8		32.8	49.6	98.9	78.1	90.7	62.7	69	Unique	68.12	High	0	1.773e-05
FALSE	High	DNLAEELEGVAGR	1xTMT6plex [N-Term]	7.99925e-07	0	1	1	1	P48681	0	1601.83	High	High	High	High	High	High	High	High	High	139.5	4.2	60.3	50	65.3	122.5	67.3	29.9	45.5	Unique	93.71	High	0	9.208e-07
FALSE	High	ACLISLGYDVENDR	1xTMT6plex [N-Term]; 1xCarbamidomethyl [C2]	2.83835e-06	0	1	4	2	O43707	0	1853.93	High	High	High	High	High	High	High	High	High	185.5	9.5	100.7	70.2	55.3	124.8	54.5	33.7	58.5	Unique	61.33	High	0	3.167e-06
FALSE	High	TSLALDESLFR	1xTMT6plex [N-Term]	8.11466e-05	0	1	6	1	Q92843-2	0	1480.82	High	High	High	High	High	High	High	High	High	77.8	1	13.3	49.9	53.4	60.3	68.5	43.6	46.7	Unique	69.71	High	0	8.344e-05
FALSE	High	SLPVPQLVPETEDEK	2xTMT6plex [N-Term; K15]	1.10033e-06	0	1	5	1	O00154	0	2139.19	High	High	High	High	High	High	High	High	High	69.5	1.3	32.9	21.5	19.1	58.6	16	18.4	35.5	Unique	90.54	High	0	1.257e-06
FALSE	High	MYEVVYQIGTETR	1xTMT6plex [N-Term]	3.54126e-07	0	1	2	1	Q9UHG3	0	1817.93	High	High	High	High	High	High	High	High	High	200.7	6.6	61.5	91.4	120.4	78.5	91	59.4	41.2	Unique	101.8	High	0	4.164e-07
FALSE	High	SLVPAAELLESR	1xTMT6plex [N-Term]	7.58295e-06	0	3	9	2	Q15149-4; Q15149; Q15149-3	0	1513.88	High	High	High	High	High	High	High	High	High	158.6	6.2	91.5	70.8	79.9	103.4	95.6	61.6	71.5	NotUnique	80.22	High	0	8.228e-06
FALSE	High	NYGSYSTQASAAAATAELLK	2xTMT6plex [N-Term; K20]	2.95733e-05	0	2	2	1	O14828; O14828-2	0	2475.31	High	Not Found	High	High	High	High	High	High	High	73.6		19.9	14.1	30.7	40.5	41.8	25.5	39.5	NotUnique	42.39	High	0	3.097e-05
FALSE	High	NADMSEDMQQDAVDCATQAMEK	2xTMT6plex [N-Term; K22]; 1xCarbamidomethyl [C15]	6.0229e-08	0	1	1	1	Q96FJ2	0	2946.3	High	Not Found	High	High	High	High	High	High	High	113		40.4	25.8	50.8	70.3	49.6	39.5	48.6	Unique	79.3	High	0	7.416e-08
FALSE	High	ALNEVFIGESLSSR	1xTMT6plex [N-Term]	2.71542e-06	0	1	5	1	Q4G0N4	0	1750.95	High	Not Found	High	High	High	High	High	High	High	14.3		7.7	6.9	10.3	15.1	12	7.5	9.6	Unique	62.42	High	0	3.014e-06
FALSE	High	LPPPPDCPTSLHQLMLDCWQK	3xTMT6plex [N-Term; K21; S/T]; 2xCarbamidomethyl [C7; C18]	0.000130724	0	1	2	2	P54760	0	3220.69	High	Not Found	High	High	High	High	High	High	High	130.9		20.7	57.4	82.6	25.1	70.7	49.8	15.5	Unique	22.54	High	0	0.0001496
FALSE	High	VLVTGATGLLGR	1xTMT6plex [N-Term]	3.49635e-05	0	1	6	1	Q9NZL9	0	1385.87	High	High	High	High	High	High	High	High	High	42.7	1.2	39.5	21.2	24.2	73.3	28.2	20.5	36.6	Unique	66.48	High	0	3.648e-05
FALSE	High	FSTQGMGTFNPADYSDSTSTDVCGTK	2xTMT6plex [N-Term; K26]; 1xCarbamidomethyl [C23]	1.23423e-07	0	1	2	1	Q5T6F2	0	3232.48	High	Not Found	High	High	High	High	High	High	High	82.4		26.8	35.9	56.3	33.4	72.6	49	32.9	Unique	89.72	High	0	1.485e-07
FALSE	High	STLLADDLEIK	2xTMT6plex [N-Term; K11]	1.77238e-05	0	1	2	1	P34910-2	0	1675.99	High	High	High	High	High	High	High	High	High	93.2	1.4	27.3	34.3	45.7	36.7	56.2	40.6	21.7	Unique	65.48	High	0	1.891e-05
FALSE	High	NATDAVGIVLK	2xTMT6plex [N-Term; K11]	1.4085e-05	0	1	10	1	P51398	0	1558.96	High	Not Found	High	High	High	High	High	High	High	474.8		81.2	141	322.6	285.7	329.7	204.4	241.5	Unique	70.55	High	0	1.511e-05
FALSE	High	SQYDYILPQVSFTAVGYHK	3xTMT6plex [N-Term; T13; K19]	3.44881e-06	0	3	12	1	Q5JPE7; J3KN36; A0A087X117	0	2903.59	High	High	High	High	High	High	High	High	High	66.7	1	9.5	48	151.6	30	72	65.2	31.4	NotUnique	35.04	High	0	3.835e-06
FALSE	High	SQYDYILPQVSFTAVGYHK	2xTMT6plex [N-Term; K19]	1.20125e-05	0	3	12	1	Q5JPE7; J3KN36; A0A087X117	0	2674.43	High	Not Found	High	High	High	High	High	High	High	44.8		13.2	61.1	68	13.8	38.3	24	17.8	NotUnique	37.98	High	0	1.285e-05
FALSE	High	GPQITGPSLEGDLGLK	2xTMT6plex [N-Term; K16]	5.00225e-06	0	1	1	2	Q09666	0	2040.17	High	Not Found	High	High	High	High	High	High	High	448.2		214.7	200.7	185.4	244.6	194	142.9	207.3	Unique	46.72	High	0	7.771e-06
FALSE	High	IQAASEAGEGPFSETYTFSTTK	2xTMT6plex [N-Term; K22]	8.5109e-07	0	1	1	1	Q53EP0	0	2780.4	High	High	High	High	High	High	High	High	High	90.2	1	15.7	47.8	68	22.4	65.3	32.9	16.8	Unique	79.83	High	0	9.78e-07
FALSE	High	ITDWDSSINLTFHK	3xTMT6plex [N-Term; T11; K14]	0.000138836	0	1	2	1	Q8WU76	0	2364.32	High	Not Found	High	High	High	High	High	High	High	69.2		26.7	25.5	68.4	53	55.6	47.4	38.4	Unique	20.75	High	0	0.0001409
FALSE	High	ITDWDSSINLTFHK	2xTMT6plex [N-Term; K14]	6.94069e-06	0	1	2	1	Q8WU76	0	2135.15	High	Not Found	High	High	High	High	High	High	High	132.9		72.1	85.6	96.8	84.6	90.5	62.3	61.5	Unique	43.07	High	0	7.539e-06
FALSE	High	NLQPASEYTVSLVAIK	2xTMT6plex [N-Term; K16]	8.93062e-05	0	2	15	2	P02751-10; P02751	0	2191.27	High	High	High	High	High	High	High	High	High	473.9	1.1	22.1	173.4	414.2	104.7	289.6	164.8	113.9	NotUnique	43.22	High	0	9.129e-05
FALSE	High	EYQLNDSASYYLNDLDR	1xTMT6plex [N-Term]; 1xDeamidated [N]	2.4853e-06	0	1	1	3	P08754	0	2309.08	High	High	High	High	High	High	High	High	High	43.6	1.4	14.3	25.1	27.7	20.5	39.6	28.1	19.4	Unique	71.46	High	0.0006796	0.005827
FALSE	High	VYKAPEEPNIQVNPLGIPVNSKEPEEVATCVGR	3xTMT6plex [N-Term; K3; K22]; 1xDeamidated [N]; 1xCarbamidomethyl [C30]	1.09998e-07	0	1	1	3	P43121	2	4322.33	High	Not Found	High	High	High	High	High	High	High	21.9		49.6	47.5	147	56.1	131.2	73.8	23.7	Unique	86.13	High	0	1.329e-07
FALSE	High	VYKAPEEPNIQVNPLGIPVNSKEPEEVATCVGR	3xTMT6plex [N-Term; K3; K22]; 1xCarbamidomethyl [C30]	4.11696e-06	0	1	1	1	P43121	2	4321.35	High	Not Found	High	High	High	High	High	High	High	22.6		53.7	51.6	165.1	60.8	184.6	88.1	20.9	Unique	75.69	High	0	4.546e-06
FALSE	High	EFTGFPDPYTELNTGKGEGVAYR	2xTMT6plex [N-Term; K16]	2.76394e-06	0	1	15	1	O75923-8	1	3006.52	High	Not Found	High	High	High	High	High	High	High	20.6		75.5	49.1	129.8	104.6	138.9	66.1	45.3	Unique	56.39	High	0	3.071e-06
FALSE	High	DALLSALSIQNYHLECNETK	2xTMT6plex [N-Term; K20]; 1xCarbamidomethyl [C16]	2.80965e-10	0	2	4	2	Q01082; Q01082-3	0	2777.45	High	Not Found	High	High	High	High	High	High	High	196		75.7	65	58.3	68	45.3	37.5	68.5	NotUnique	99.05	High	0	3.932e-10
FALSE	High	MEEIVEGCTGALHILAR	1xTMT6plex [N-Term]; 1xCarbamidomethyl [C8]	2.76241e-08	0	2	3	2	P14923; P35222	0	2128.11	High	High	High	High	High	High	High	High	High	179.3	6.8	59	113.8	122.4	68.1	134.5	77.2	48.7	NotUnique	64.05	High	0	1.212e-06
FALSE	High	IPGMLIIDTPGHESFSNLR	1xTMT6plex [N-Term]	7.85614e-08	0	1	2	3	A0A087WUT6	0	2326.24	High	High	High	High	High	High	High	High	High	68.5	47.9	117.5	70	57.8	82.3	48.7	33.6	48.8	Unique	80.59	High	0	9.602e-08
FALSE	High	NLMQTLMEDYETHK	2xTMT6plex [N-Term; K14]	2.69097e-07	0	1	5	2	Q9Y2D5-6	0	2211.12	High	Not Found	High	High	High	High	High	High	High	282.5		125.8	71.3	144.9	175.6	128	85	113.6	Unique	66.49	High	0	3.182e-07
FALSE	High	VIPATDLSEQISTAGTEASGTGNMK	2xTMT6plex [N-Term; K25]	6.94231e-07	0	1	3	1	P06737	0	2936.53	High	Not Found	High	High	High	High	High	High	High	33		33.6	17.4	16	46.4	18.6	21.4	18.1	Unique	69.65	High	0	7.979e-07
FALSE	High	YYLVHQEPLENFQCNVPLGMESGR	1xTMT6plex [N-Term]; 1xCarbamidomethyl [C14]	6.46586e-05	0	1	6	1	O60462	0	3109.51	High	Not Found	High	High	High	Not Found	High	High	Not Found	10.4		0.5	3.2	8.4		9	3.6		Unique	58.45	High	0	6.681e-05
FALSE	High	DPYTGQSVSLFQALK	2xTMT6plex [N-Term; K15]	0.000112884	0	3	9	1	Q15149-4; Q15149; Q15149-3	0	2112.17	High	Not Found	High	High	High	High	High	High	High	702.2		373.6	409.3	295	383.9	356.9	276.6	350.4	NotUnique	39.89	High	0	0.0001148
FALSE	High	EHEVEVNGTDTLWGETALTAAAGR	1xTMT6plex [N-Term]; 1xDeamidated [N7]	2.99051e-09	0	1	2	1	Q9C0D5	0	2757.35	High	Not Found	High	High	High	High	High	High	High	6.4		1.9	2.5	3.2	3.5	6.9	1.4	2	Unique	79.44	High	0	3.953e-09
FALSE	High	DFIDSLGLLHEQNMAK	2xTMT6plex [N-Term; K16]	1.95553e-08	0	1	3	1	Q7L2H7	0	2289.23	High	Not Found	High	High	High	High	High	High	High	316.8		115.9	75.9	33.7	57.7	45.2	34.2	56.2	Unique	53.48	High	0	2.46e-08
FALSE	High	RLFELEEQDLFR	1xTMT6plex [N-Term]	2.31005e-05	0	1	2	1	Q9NZN4	1	1823.99	High	High	High	High	High	High	High	High	High	36	5.9	69.5	40.6	42.5	83.4	53.2	36.8	55.7	Unique	71.01	High	0	2.435e-05
FALSE	High	KLLVDAIHNQLTDMEK	3xTMT6plex [N-Term; K1; K16]	1.20223e-06	0	1	3	1	Q9NUQ7	1	2555.48	High	Not Found	High	High	High	High	High	High	High	101.7		124.5	82.8	82.6	131.7	82.3	55.5	83.3	Unique	31.78	High	0	1.362e-06
FALSE	High	EYQLNDSASYYLNDLDR	1xTMT6plex [N-Term]	4.78398e-08	0	1	1	2	P08754	0	2308.09	High	High	High	High	High	High	High	High	High	141.7	11.4	52.6	76.9	84.6	56.4	106.2	75.3	40.4	Unique	79.97	High	0	5.889e-08
FALSE	High	TPFLLSGTSYK	2xTMT6plex [N-Term; K11]	6.94069e-06	0	1	6	3	P55084	0	1671.97	High	Not Found	High	High	High	High	High	High	High	266.1		142.9	155.5	285.9	244.8	212.5	133.4	187.9	Unique	63.77	High	0	7.582e-06
FALSE	High	ACLISLGYDVENDR	1xTMT6plex [N-Term]; 1xDeamidated [N12]; 1xCarbamidomethyl [C2]	3.2125e-07	0	1	4	1	O43707	0	1854.91	High	High	High	High	High	High	High	High	High	17.1	2.4	12.4	7.7	6.5	13.6	8.1	6.2	7.1	Unique	75.37	High	0	3.78e-07
FALSE	High	SPPLIGSESAYESFLSADDKASGR	2xTMT6plex [N-Term; K20]	4.0447e-06	0	1	1	1	P46821	1	2942.51	High	Not Found	High	High	High	High	High	High	High	2.1		10	2.3	11.2	13.3	15.2	10.1	2.8	Unique	60.42	High	0	4.475e-06
FALSE	High	ILYNPLQGQK	2xTMT6plex [N-Term; K10]	6.02841e-05	0	1	1	2	O00622	0	1631.99	High	Not Found	High	High	High	High	High	High	High	180.4		39.3	77.1	314.3	86.9	203.8	116.3	29.7	Unique	79.48	High	0	6.215e-05
FALSE	High	VIESTQGLGNDLAGVLALQR	1xTMT6plex [N-Term]	2.3974e-08	0	1	2	1	O15020	0	2283.29	High	High	High	High	High	High	High	High	High	45.1	2.3	27.7	33.4	32.6	36	27.5	20.9	27.5	Unique	96.55	High	0	3.002e-08
FALSE	High	LSAGESISLDEFK	2xTMT6plex [N-Term; K13]	2.42014e-06	0	1	1	2	Q8IYU8	0	1854.03	High	High	High	High	High	High	High	High	High	84.2	2.2	38.8	49.3	52.4	61.1	48.8	34.5	61.7	Unique	68.29	High	0	2.701e-06
FALSE	High	ALASILLQDHIR	1xTMT6plex [N-Term]	5.32204e-06	0	1	3	2	Q6DD88	0	1578.95	High	High	High	High	High	High	High	High	High	307.2	35.2	208.1	202.8	166.6	192.3	125	106.1	150	Unique	64.43	High	0	5.83e-06
FALSE	High	NVQQIGILKPHPAYVQLLEK	3xTMT6plex [N-Term; K9; K20]	1.44798e-06	0	1	1	1	O00411	0	2975.8	High	Not Found	High	High	High	High	High	High	High	241.8		30.2	57.2	173	89	221	136.6	95.5	Unique	38.36	High	0	1.641e-06
FALSE	High	GGMGSGGLATGIAGGLAGMGGIQNEK	2xTMT6plex [N-Term; K26]; 1xOxidation [M]	1.88674e-09	0	1	2	3	P05783	0	2735.42	High	Not Found	High	High	High	High	High	High	High	149.6		96.1	106.5	101.7	158.5	118.8	100.9	105.6	Unique	104.59	High	0	2.516e-09
FALSE	High	GGMGSGGLATGIAGGLAGMGGIQNEK	2xTMT6plex [N-Term; K26]	2.0222e-13	0	1	2	2	P05783	0	2719.43	High	Not Found	High	High	High	High	High	High	High	242.5		169.8	179.7	158	261.5	184.2	158.5	161.9	Unique	117.5	High	0	3.406e-13
FALSE	High	TVNLNLWDTAGQEEYDR	1xTMT6plex [N-Term]	2.3148e-07	0	1	1	1	P84095	0	2253.1	High	High	High	High	High	High	High	High	High	76.1	1.4	58.8	35.1	59.8	70.6	67.9	40.6	59.1	Unique	58.86	High	0	2.744e-07
FALSE	High	GFPTIYFSPANKK	3xTMT6plex [N-Term; K12; K13]	1.81998e-05	0	1	1	2	P30101	1	2157.27	High	Not Found	High	High	High	High	High	High	High	263.8		264.4	269.1	545.7	302.4	622	327.5	180.7	Unique	31.11	High	0	1.941e-05
FALSE	High	NLHIPTMENGPELILR	1xTMT6plex [N-Term]; 1xDeamidated [N9]	2.82978e-05	0	1	6	2	O15382	0	2077.13	High	High	High	High	High	High	High	High	High	123.8	4.7	61.3	47.7	91.5	98.4	67.9	47.5	71.9	Unique	42.36	High	0.0003346	0.002078
FALSE	High	EAESCDCLQGFQLTHSLGGGTGSGMGTLLISK	4xTMT6plex [N-Term; K32; S/T]; 2xCarbamidomethyl [C5; C7]	2.938e-09	0	3	10	10	P04350; P07437; P68371	0	4228.19	High	Not Found	High	High	High	High	High	High	High	102.3		18.5	15.8	84.9	80.8	55.8	59.4	48.2	NotUnique	30.42	High	0	2.149e-06
FALSE	High	EAESCDCLQGFQLTHSLGGGTGSGMGTLLISK	3xTMT6plex [N-Term; K32; T/S]; 2xCarbamidomethyl [C5; C7]	8.58661e-07	0	3	10	10	P04350; P07437; P68371	0	3999.02	High	Not Found	High	High	High	High	High	High	High	47		19	23.2	20.7	26.5	18.9	15.6	14.1	NotUnique	51.98	High	0	9.815e-07
FALSE	High	EAESCDCLQGFQLTHSLGGGTGSGMGTLLISK	2xTMT6plex [N-Term; K32]; 2xCarbamidomethyl [C5; C7]	6.45289e-13	0	3	10	2	P04350; P07437; P68371	0	3769.86	High	Not Found	High	High	High	High	High	High	High	49.6		40.3	39.7	18.2	23.4	15.9	11.6	9.8	NotUnique	141.94	High	0	1.058e-12
FALSE	High	YGGPPPDSVYSGQQPSVGTEIFVGK	2xTMT6plex [N-Term; K25]	1.15959e-08	0	2	6	1	O60506; O60506-3	0	3024.57	High	Not Found	High	High	High	High	High	High	High	76.7		26.6	24.9	43.6	44	49	36.5	36	NotUnique	72.3	High	0	1.485e-08
FALSE	High	GIFASGSPFK	2xTMT6plex [N-Term; K10]	0.000147431	0	1	2	2	Q16798	0	1468.86	High	Not Found	High	High	High	High	High	High	High	266.3		200.9	176.2	294.8	324.7	195.9	126.9	194.2	Unique	48.95	High	0	0.000149
FALSE	High	EALLGDTGTGDFLK	2xTMT6plex [N-Term; K14]	9.89066e-08	0	1	1	1	O00400	0	1895.05	High	Not Found	High	High	High	High	High	High	High	281.1		104.2	118.3	72.6	111.6	99.9	62	102.9	Unique	91.83	High	0	1.199e-07
FALSE	High	THSDSKPYGPMSVGLDFSLPGMEHVYGIPEHADNLR	3xTMT6plex [N-Term; K6; S]	8.13925e-06	0	2	4	2	Q14697; Q14697-2	0	4641.35	High	Not Found	High	High	High	High	High	High	High	217.4		60.3	91.8	200.5	86.7	173.9	95.4	73.7	NotUnique	19.6	High	0	8.799e-06
FALSE	High	THSDSKPYGPMSVGLDFSLPGMEHVYGIPEHADNLR	2xTMT6plex [N-Term; K6]	1.29011e-07	0	2	4	1	Q14697; Q14697-2	0	4412.18	High	Not Found	High	High	High	High	High	High	High	93.4		65.6	94.3	62.6	26.9	58.2	29.3	24.2	NotUnique	27.98	High	0	1.547e-07
FALSE	High	FHTEALTALLSDDSK	2xTMT6plex [N-Term; K15]	0.00012307	0	1	5	1	P62495	0	2106.15	High	Not Found	High	High	High	High	High	High	High	178.8		64.1	88.3	132.8	99.3	116.4	128.6	105.1	Unique	48.6	High	0	0.0001251
FALSE	High	LLPQGLAVYASPENKK	3xTMT6plex [N-Term; K15; K16]	5.76401e-07	0	1	5	1	Q9BYD2	1	2415.46	High	High	High	High	High	High	High	High	High	66.5	1	45.8	53.8	122.5	92.7	96.7	71.7	68.5	Unique	54.02	High	0	6.665e-07
FALSE	High	GSPEFPAQETPTTFPEEAPTVSPAVAQSNSSEEEAR	1xTMT6plex [N-Term]	3.34569e-05	0	1	3	1	Q5JSZ5	0	4003.89	High	High	High	High	High	High	High	High	High	26.4	8.1	15.5	19.1	26.5	16.4	34.5	17	12.3	Unique	59.02	High	0	3.508e-05
FALSE	High	TVDFTQDSNYLLTGGQDK	2xTMT6plex [N-Term; K18]	2.50689e-07	0	1	2	1	Q9Y3F4-2	0	2460.27	High	Not Found	High	High	High	High	High	High	High	100.3		66.5	51.4	70.6	68.1	80.5	66	53.6	Unique	74.82	High	0	2.977e-07
FALSE	High	VFTSSTISGGYAEYALAADHTVYK	3xTMT6plex [N-Term; K24; T/S]	4.86948e-08	0	1	4	2	Q08257	0	3238.72	High	Not Found	High	High	High	High	High	High	High	52		16.9	15.4	32.9	42.2	35.1	23.8	38.1	Unique	43.42	High	0	5.981e-08
FALSE	High	VFTSSTISGGYAEYALAADHTVYK	2xTMT6plex [N-Term; K24]	5.65435e-11	0	1	4	1	Q08257	0	3009.56	High	Not Found	High	High	High	High	High	High	High	125.9		73.2	86.9	65.6	88.2	79.5	57.5	95.9	Unique	89.94	High	0	8.238e-11
FALSE	High	VYTIDFNSMQQINEDTGTAR	1xTMT6plex [N-Term]	1.53868e-05	0	1	2	1	Q14669-2	0	2532.22	High	Not Found	High	High	High	High	High	High	High	11.4		1.8	9.4	8.3	5.5	8.8	3.7	2.6	Unique	44.39	High	0	1.639e-05
FALSE	High	ALEPLEGLETMR	1xTMT6plex [N-Term]	6.52269e-05	0	1	5	1	P29372-2	0	1587.86	High	High	High	High	High	High	High	High	High	34.7	2	23.3	32	25.7	34.5	30	21.5	32	Unique	60.93	High	0	6.711e-05
FALSE	High	LAEVEAALEK	2xTMT6plex [N-Term; K10]	4.2433e-05	0	3	9	1	Q15149-4; Q15149; Q15149-3	0	1530.91	High	Not Found	High	High	High	High	High	High	High	205.6		93	86.1	88.7	97.9	109.2	67.1	81	NotUnique	60.75	High	0	4.4e-05
FALSE	High	QGEYGLASICNGGGGASAMLIQK	2xTMT6plex [N-Term; K23]; 1xDeamidated [N11]; 1xCarbamidomethyl [C10]	5.08806e-09	0	1	1	1	P24752	0	2741.4	High	Not Found	High	High	High	High	High	High	High	77		31.7	31.8	56.4	51.7	42.3	34.3	42.2	Unique	85.54	High	0	6.621e-09
FALSE	High	AEQDITTLEQSISR	1xTMT6plex [N-Term]	7.25473e-06	0	1	5	1	Q9Y608-4	0	1819.96	High	High	High	High	High	High	High	High	High	64.8	10	98.9	30.6	37.6	96.2	37.6	16.2	41.8	Unique	53.44	High	0	7.892e-06
FALSE	High	IALGNEEGLFVVHVTK	3xTMT6plex [N-Term; T15; K16]	1.83913e-06	0	1	12	1	Q5VT25-2	0	2413.44	High	Not Found	High	High	High	High	High	High	High	239.1		56.8	63.8	274.2	176.9	238.5	165.5	138.4	Unique	33.1	High	0	2.069e-06
FALSE	High	SEQEITALEQNVIR	1xTMT6plex [N-Term]	5.76401e-07	0	1	1	1	Q32MZ4-4	0	1859.01	High	High	High	High	High	High	High	High	High	30.4	1.5	58.9	13.2	25.7	69	16.8	18.8	25.8	Unique	65.96	High	0	6.699e-07
FALSE	High	VDFPQDQLTALTGR	1xTMT6plex [N-Term]	3.60493e-06	0	1	3	2	P40926	0	1789.96	High	High	High	High	High	High	High	High	High	165	5.7	94.8	78.2	112.5	111	102.6	57.3	84.4	Unique	71.14	High	0	3.971e-06
FALSE	High	FTPVDESVTFIGR	1xTMT6plex [N-Term]	7.97437e-05	0	1	2	1	Q12768	0	1696.91	High	High	High	High	High	High	High	High	High	44.5	1.9	33.1	26.6	46.7	47.8	32.9	21.5	30.2	Unique	37.52	High	0	8.178e-05
FALSE	High	LTNENLYFEELYADDPKK	3xTMT6plex [N-Term; K17; K18]	3.01826e-08	0	1	4	1	Q9Y4I1-3	1	2889.55	High	Not Found	High	High	High	High	High	High	High	11.4		18.9	9.7	15.1	20.8	18.8	14.1	15.4	Unique	38.79	High	0	3.781e-08
FALSE	High	LLEAQACTGGIIDPSTGERFPVTDAVNK	2xTMT6plex [N-Term; K28]; 1xCarbamidomethyl [C7]	1.652e-09	0	3	9	1	Q15149-4; Q15149; Q15149-3	1	3417.81	High	Not Found	High	High	High	High	High	High	High	74		121.4	91.3	172.1	155	172.5	110.7	89.2	NotUnique	86.44	High	0	2.221e-09
FALSE	High	QQEGEASSQDMTAQVTSPSGK	2xTMT6plex [N-Term; K21]	4.26537e-06	0	1	2	2	Q14315	0	2624.29	High	Not Found	High	High	High	High	High	High	High	235.7		181.1	70.5	89.2	210.8	84.9	57.3	96.7	Unique	67.15	High	0	4.695e-06
FALSE	High	SPILLGSLAHQIYR	2xTMT6plex [N-Term; S7]	3.9899e-05	0	1	1	1	P31937	0	2026.22	High	Not Found	High	High	High	High	High	High	High	122		102.9	73.8	168.2	213.8	130.5	86.1	153.6	Unique	28.69	High	0	4.161e-05
FALSE	High	SPILLGSLAHQIYR	1xTMT6plex [N-Term]	7.1268e-08	0	1	1	1	P31937	0	1797.06	High	High	High	High	High	High	High	High	High	44.8	17.2	147	108.2	42.3	55.4	31.2	20.4	38.5	Unique	67.56	High	0	8.682e-08
FALSE	High	LAQMISDHNDADFEEK	2xTMT6plex [N-Term; K16]	9.13147e-06	0	3	11	1	Q14157-1; F8W726; Q14157-5	0	2321.15	High	High	High	High	High	High	High	High	High	114	1.2	58.7	80.7	130.1	87.8	135.4	104.4	71.1	NotUnique	54.16	High	0	9.882e-06
FALSE	High	QASPETSASPDGSQNLVYETELLR	1xTMT6plex [N-Term]	1.19081e-08	0	2	4	1	Q14789-2; Q14789	0	2821.41	High	High	High	High	High	High	High	High	High	80.3	1.4	31.1	39.4	56.3	58.2	76.1	37	49.7	NotUnique	84.88	High	0	1.516e-08
FALSE	High	IGASTLLSDIER	1xTMT6plex [N-Term]	1.93608e-05	0	1	3	1	Q9Y315	0	1503.86	High	Not Found	High	High	High	High	High	High	High	64		45.9	32.3	27.1	57.9	30.4	25.6	31.7	Unique	68.42	High	0	2.047e-05
FALSE	High	ISTLYYQLGDHELSLSEVR	2xTMT6plex [N-Term; T/S]	2.78802e-07	0	1	2	3	Q13217	0	2681.46	High	High	High	High	High	High	High	High	High	258.5	1.4	76	58.9	148	109.2	207.5	91.7	73	Unique	38.44	High	0	3.292e-07
FALSE	High	ISTLYYQLGDHELSLSEVR	1xTMT6plex [N-Term]	3.90075e-09	0	1	2	2	Q13217	0	2452.29	High	High	High	High	High	High	High	High	High	122.7	1.9	38.9	56.2	78.2	44.2	87.7	35.8	32.3	Unique	77.56	High	0	5.118e-09
FALSE	High	HLLQAPLDDAQEILQAR	1xTMT6plex [N-Term]	7.85618e-06	0	1	2	1	Q15437	0	2160.2	High	High	High	High	High	High	High	High	High	138.5	5.9	55.5	46.3	83.4	90.6	120.5	75.7	55.2	Unique	78.38	High	0	8.492e-06
FALSE	High	LLQTMNLTQK	2xTMT6plex [N-Term; K10]	0.000137648	0	1	2	1	A0A087X256	0	1647.99	High	Not Found	High	High	High	High	High	High	High	16.7		7.8	6	9.1	12.9	10.4	6.6	5.9	Unique	62.18	High	0	0.0001398
FALSE	High	EANSIIITPGYGLCAAK	2xTMT6plex [N-Term; K17]; 1xCarbamidomethyl [C14]	5.56289e-06	0	1	2	1	Q13423	0	2236.24	High	Not Found	High	High	High	High	High	High	High	109.4		44.5	61.4	89.5	74.5	67.4	42.2	65.7	Unique	51.7	High	0	6.095e-06
FALSE	High	ESQEQSLVQLEATEWR	1xTMT6plex [N-Term]	5.32048e-08	0	1	3	1	A0A0G2JHC2	0	2162.09	High	High	High	High	High	High	High	High	High	31.2	1.9	39.1	27.8	34.3	39.7	33.4	21.6	25.4	Unique	83.7	High	0	6.519e-08
FALSE	High	ETVSQRPGATVPTDFATFPSSAFLR	1xTMT6plex [N-Term]	6.93991e-08	0	1	8	1	E7EX90	0	2911.52	High	High	High	High	High	High	High	High	High	84.7	6.4	58.2	39.3	50.1	66.9	34.8	23.5	39.4	Unique	72.93	High	0	8.483e-08
FALSE	High	IDPTVTMMQVEEKPDVTYSDVGGCK	3xTMT6plex [N-Term; K13; K25]; 1xCarbamidomethyl [C24]	9.37709e-06	0	1	3	1	P35998	0	3486.78	High	Not Found	High	High	High	High	High	High	High	158.3		86	68.8	49.1	97.8	36.6	29.2	60.1	Unique	50.13	High	0	1.012e-05
FALSE	High	RLPGDIQVVPIGVGPNANVQELER	1xTMT6plex [N-Term]	1.97067e-11	0	1	1	1	P04275	1	2799.57	High	High	High	High	High	High	High	High	High	119.4	2.6	15	69.6	131.5	18.3	101.6	49.4	4.8	Unique	108.56	High	0	2.969e-11
FALSE	High	DTSEDIEELVEPVAAHGPK	2xTMT6plex [N-Term; K19]	7.0559e-11	0	1	3	3	A0A087WW66	0	2494.31	High	Not Found	High	High	High	High	High	High	High	339.6		240.7	129.8	143.6	323.7	137.6	126.4	149.8	Unique	70.75	High	0	1.027e-10
FALSE	High	YAALSVDGEDENEGEDYAE	1xTMT6plex [N-Term]	1.07985e-09	0	1	3	1	P23588	0	2304.98	High	High	High	High	High	High	High	High	High	60.7	6.4	52.9	30.3	51.9	61.2	58.4	36.8	34.1	Unique	111.13	High	0	1.47e-09
FALSE	High	RLPGDIQVVPIGVGPNANVQELER	1xTMT6plex [N-Term]; 1xDeamidated [N]	5.41146e-10	0	1	1	2	P04275	1	2800.55	High	Not Found	High	High	High	High	High	High	High	43.4		9.3	24	44.1	8.9	28.4	18.5	1.7	Unique	77.2	High	0	7.485e-10
FALSE	High	LGGSPTSLGTWGSWIGPDHDK	3xTMT6plex [N-Term; K21; S]	6.69617e-05	0	1	4	3	K7ELL7	0	2855.53	High	Not Found	High	High	High	High	High	High	High	781.2		89.5	135.7	220.2	155.6	210.2	126.3	136.4	Unique	28.43	High	0.0001042	0.0004165
FALSE	High	LGGSPTSLGTWGSWIGPDHDK	2xTMT6plex [N-Term; K21]	2.88641e-09	0	1	4	2	K7ELL7	0	2626.37	High	Not Found	High	High	High	High	High	High	High	487.8		91.1	137	108.9	83.9	102.1	69.8	78.3	Unique	65.43	High	0	3.826e-09
FALSE	High	LEFSDETFGSNIPK	2xTMT6plex [N-Term; K14]	3.88595e-05	0	1	3	1	Q96RP9	0	2042.08	High	Not Found	High	High	High	High	High	High	High	366.8		99.6	130.9	124.6	135.8	143.7	91.2	150.6	Unique	43.92	High	0	4.037e-05
FALSE	High	VAIVKPGVPMEIVLNK	3xTMT6plex [N-Term; K5; K16]	1.51354e-06	0	2	12	3	Q9Y4L1; J3QL06	0	2394.51	High	Not Found	High	High	High	High	High	High	High	467.6		194	230.5	364	189.5	430.8	228.1	153.5	NotUnique	54.32	High	0	1.707e-06
FALSE	High	FSLDTVINPDDR	1xTMT6plex [N-Term]	3.78469e-05	0	1	2	1	Q86U28	0	1620.84	High	High	High	High	High	High	High	High	High	44.3	1.4	18.5	20.2	29.6	36.3	33.7	20.1	20.9	Unique	79.92	High	0	3.945e-05
FALSE	High	DGMEYPFIGEGEPHVDGEPGDLR	1xTMT6plex [N-Term]	8.3555e-09	0	1	2	1	Q9UBS4	0	2745.27	High	Not Found	High	High	High	High	High	High	High	80.8		30.1	33.2	52.2	25.2	54	27.8	26.6	Unique	71.07	High	0	1.077e-08
FALSE	High	GASLEEVNDEGYTPLMEAAR	1xTMT6plex [N-Term]	1.36053e-07	0	1	9	1	O75179	0	2381.15	High	Not Found	High	High	High	High	High	High	High	12.9		7.8	7.9	9	7.6	16	7.7	5.7	Unique	81.45	High	0	1.629e-07
FALSE	High	VIITNFPAAK	2xTMT6plex [N-Term; K10]	0.000141241	0	1	5	2	P47897	0	1531.96	High	High	High	High	High	High	High	High	High	231.9	1	149.4	96.3	137.5	150.8	126.9	81.6	91.7	Unique	60.52	High	0	0.000143
FALSE	High	TSSAETPTIPLGSAVEAIK	2xTMT6plex [N-Term; K19]	2.35119e-05	0	2	7	2	Q16891-4; Q16891-2	0	2330.32	High	Not Found	High	High	High	High	High	High	High	187.8		62.2	53.8	137.1	145.9	129.5	97.1	118	NotUnique	52.12	High	0	2.488e-05
FALSE	High	TTLLEGFAGVEEAR	1xTMT6plex [N-Term]	1.9224e-06	0	1	6	1	P35658-5	0	1721.93	High	Not Found	High	High	High	High	High	High	High	43.9		9.7	10.1	19.2	23.4	28.9	16.5	17.1	Unique	55.47	High	0	2.157e-06
FALSE	High	KLGSDVFSQNVIVGTVK	3xTMT6plex [N-Term; K1; K17]	6.40926e-06	0	1	4	1	Q9NP80	1	2478.49	High	Not Found	High	High	High	High	High	High	High	69.5		38.9	46.4	66	79	63.5	39.2	58.6	Unique	51.42	High	0	7.017e-06
FALSE	High	EVGGSEVPEIATGTAETEILGTQEIASR	1xTMT6plex [N-Term]	2.54978e-09	0	1	1	1	Q8N3D4	0	3073.57	High	Not Found	High	High	High	High	High	High	High	13.6		8.8	8.1	14	17.2	7.8	3.2	13.3	Unique	68.14	High	0	3.394e-09
FALSE	High	GGPNIITLADIVKDPVSR	2xTMT6plex [N-Term; K13]	5.71318e-07	0	1	3	2	P68400	1	2323.37	High	High	High	High	High	High	High	High	High	270.9	7.8	296.6	199.8	266.3	401	290.1	191.5	211.5	Unique	46.4	High	0	8.29e-06
FALSE	High	GEIVIGGQNISMGYFK	2xTMT6plex [N-Term; K16]	9.37709e-06	0	1	3	2	O60488	0	2171.19	High	High	High	High	High	High	High	High	High	376.2	12.1	122.6	216.6	243.3	280.2	298.7	207.7	180.3	Unique	36.95	High	0	1.013e-05
FALSE	High	IVITGDADIDHDQALAQAIK	2xTMT6plex [N-Term; K20]	5.7576e-10	0	1	5	1	Q9Y2J2-2	0	2565.43	High	Not Found	High	High	High	High	High	High	High										NoQuanValues	75.22	High	0	7.963e-10
FALSE	High	YTIIIPENLKPQMK	3xTMT6plex [N-Term; K10; K14]	4.28078e-05	0	1	1	2	P21399	0	2375.43	High	Not Found	High	High	High	High	High	High	High	227.8		144.3	128.8	144.9	239.3	293.4	190.5	179.5	Unique	22.65	High	0	4.463e-05
FALSE	High	KAGEDLEVSEGLMCFDPK	3xTMT6plex [N-Term; K1; K18]; 1xCarbamidomethyl [C14]	3.70161e-07	0	1	2	1	Q8N3C0	1	2712.42	High	Not Found	High	High	High	High	High	High	High	51.5		24.3	20.3	24.5	25.2	21.4	17.5	11.2	Unique	48.69	High	0	4.348e-07
FALSE	High	KFQPLFGDFAAEK	3xTMT6plex [N-Term; K1; K13]	9.46042e-06	0	1	1	1	Q15050	1	2185.26	High	Not Found	High	High	High	High	High	High	High	197.8		30	122.7	96.2	106.7	92.3	74.9	80.6	Unique	56.67	High	0	1.018e-05
FALSE	High	TLDFDALSVGQR	1xTMT6plex [N-Term]	1.33573e-05	0	1	1	1	Q14195-2	0	1550.84	High	High	High	High	High	High	High	High	High	68.4	3	48.9	27.4	40.3	73.4	45.2	24.4	43.6	Unique	74.13	High	0	1.433e-05
FALSE	High	EAQTSFLHLGYLPNQLFR	2xTMT6plex [N-Term; S/T]	6.93455e-05	0	1	4	3	Q92499	0	2592.43	High	High	High	High	High	High	High	High	High	233	1.7	77	297.3	578.9	188.5	362.2	386.9	226.4	Unique	19.9	High	7.07e-05	0.0002998
FALSE	High	EAQTSFLHLGYLPNQLFR	1xTMT6plex [N-Term]	2.19551e-06	0	1	4	1	Q92499	0	2363.27	High	High	High	High	High	High	High	High	High	51.9	19.3	75.7	251.3	111.8	38	73.8	62.9	47.8	Unique	50.08	High	0	2.467e-06
FALSE	High	KAPSDLYQIILK	3xTMT6plex [N-Term; K1; K12]	1.72601e-05	0	1	2	1	P07384	1	2076.3	High	Not Found	High	High	High	High	High	High	High	566.7		428.4	265.6	358.2	489.8	384.7	177.3	209.8	Unique	43.23	High	0	1.83e-05
FALSE	High	DALPEYSTFDVNMKPVVQEPNQK	3xTMT6plex [N-Term; K14; K23]	3.3584e-06	0	1	3	1	P49406	0	3336.78	High	Not Found	High	High	High	High	High	High	High	207.3		73.5	103.2	147.5	128.7	146.7	95.9	109.8	Unique	50	High	0	3.72e-06
FALSE	High	GMELSVLDSLNAR	1xTMT6plex [N-Term]	0.000135301	0	1	6	1	O14617-5	0	1633.88	High	High	High	High	High	High	High	High	High	52.3	9.5	45.5	27.9	31.2	54.8	35	24.1	25.7	Unique	41.55	High	0	0.0001377
FALSE	High	ALMPVLLQGQAR	1xTMT6plex [N-Term]	2.2103e-05	0	1	4	2	A0A0G2JJD3	0	1525.91	High	High	High	High	High	High	High	High	High	111.4	10.6	93.4	57.5	69.4	99	79.9	46.1	98.4	Unique	70.49	High	0	2.329e-05
FALSE	High	MESGIEPSVDLETLDER	1xTMT6plex [N-Term]	1.41002e-06	0	1	1	1	Q9NWU2	0	2149.05	High	Not Found	Not Found	Not Found	Not Found	High	Not Found	Not Found	Not Found	3.3					2.6				Unique	65.81	High	0	1.602e-06
FALSE	High	KPGGFDISLFYR	2xTMT6plex [N-Term; K1]	4.22777e-06	0	1	3	2	P12956	0	1858.06	High	High	High	High	High	High	High	High	High	157.5	0.6	58.1	188.7	194.2	134.3	212.9	162.6	126.6	Unique	33.42	High	0	4.672e-06
FALSE	High	EQDGFTGKEEVVEQGELNATEEVWIPGEGHPESPEPK	3xTMT6plex [N-Term; K8; K37]	4.92703e-05	0	1	1	1	P48681	1	4765.37	High	Not Found	High	High	High	High	High	High	High										NoQuanValues	63.27	High	0	5.126e-05
FALSE	High	GGDLMLVHYEGYLEK	2xTMT6plex [N-Term; K15]	8.14222e-07	0	1	3	2	Q9NWM8	0	2182.16	High	High	High	High	High	High	High	High	High	656.6	6.2	81.4	226.5	334.7	93.3	309.3	137.5	46	Unique	57.08	High	0	9.312e-07
FALSE	High	GGGGSGGYYGQGGMSGGGWR	1xTMT6plex [N-Term]	5.9149e-09	0	1	4	1	P31942	0	2033.91	High	Not Found	Not Found	High	Not Found	Not Found	High	High	High	4.1			2			1.5	1.8	1.3	Unique	77.24	High	0	7.704e-09
FALSE	High	VVLMPVNAGQPLHASNIELLDNPGCK	3xTMT6plex [N-Term; S15; K26]; 1xCarbamidomethyl [C25]	3.29945e-06	0	1	1	1	Q14571	0	3473.92	High	Not Found	High	High	High	High	High	High	High	172.9		76.6	75.9	88.5	127.3	87.2	51.1	92.4	Unique	40.42	High	0	3.661e-06
FALSE	High	LERPFQPAEESVTLEFAK	2xTMT6plex [N-Term; K18]	8.21189e-08	0	1	3	1	Q5T7V8	0	2549.4	High	Not Found	High	High	High	High	High	High	High	23.7		9.6	11.6	21.8	14.1	23.1	14.4	13.2	Unique	51.1	High	0	1.001e-07
FALSE	High	ESQAKDVIEEYFK	3xTMT6plex [N-Term; K5; K13]	2.31005e-05	0	1	1	1	P25398	1	2273.26	High	Not Found	High	High	High	High	High	High	High	175.2		66.3	61.6	349.6	145	432.2	181.7	75.2	Unique	31.24	High	0	2.443e-05
FALSE	High	AVSQLIADAGIGGSR	1xTMT6plex [N-Term]	1.90218e-05	0	1	2	1	Q96BY6-3	0	1643.93	High	High	High	High	High	High	High	High	High	72	12.6	49.9	60	56.5	55.6	47.1	26.3	34.7	Unique	81.56	High	0	2.019e-05
FALSE	High	SMMQDREDQSILCTGESGAGK	2xTMT6plex [N-Term; K21]; 2xOxidation [M2; M3]; 1xCarbamidomethyl [C13]	5.61235e-06	0	1	3	1	P35579	1	2790.31	High	Not Found	High	High	High	High	High	High	High	11.5		30.8	21.7	30.9	40.9	34.9	18.2	19.6	Unique	51.79	High	0	6.158e-06
FALSE	High	SMMQDREDQSILCTGESGAGK	2xTMT6plex [N-Term; K21]; 1xOxidation [M]; 1xCarbamidomethyl [C13]	1.40907e-08	0	1	3	6	P35579	1	2774.32	High	Not Found	High	High	High	High	High	High	High	92.7		248.6	145.5	249	321	269.4	159.3	163.6	Unique	73.46	High	0	2.8e-08
FALSE	High	SMMQDREDQSILCTGESGAGK	2xTMT6plex [N-Term; K21]; 1xCarbamidomethyl [C13]	7.5798e-09	0	1	3	2	P35579	1	2758.32	High	Not Found	High	High	High	High	High	High	High	107.9		320.6	193.7	313.8	398.5	337.3	202.8	223.4	Unique	84.11	High	0	9.785e-09
FALSE	High	ESEGLYGQPGDETYQDIFR	1xTMT6plex [N-Term]	7.78697e-06	0	1	2	1	Q15057	0	2433.14	High	High	High	High	High	High	High	High	High	70.7	1.3	58.4	51.9	82.4	82.3	83.3	52.2	40.7	Unique	40.28	High	0	8.459e-06
FALSE	High	DIKPANVFITATGVVK	3xTMT6plex [N-Term; K3; K16]	4.04297e-08	0	2	10	1	Q8TDX7; Q9HC98-2	0	2360.45	High	Not Found	High	High	High	High	High	High	High	457.1		305.8	312.7	367.9	374.7	581.8	423.5	337.7	NotUnique	53.31	High	0	5.027e-08
FALSE	High	TWLIDLGKPTDCSTK	3xTMT6plex [N-Term; K8; K15]; 1xCarbamidomethyl [C12]	2.98352e-05	0	1	3	2	O60449	0	2422.36	High	Not Found	High	High	High	High	High	High	High	247.2		42.1	92.3	183.1	72.7	146.2	88.2	28.7	Unique	31.11	High	0	3.12e-05
FALSE	High	EKLENDIAEIMK	3xTMT6plex [N-Term; K2; K12]	3.49635e-05	0	1	6	1	P30622-2	1	2120.22	High	Not Found	High	High	High	High	High	High	High	232.7		243.2	83.8	148.5	231.7	110.4	71.8	98.3	Unique	41.08	High	0	3.658e-05
FALSE	High	YLLQETWLEKK	3xTMT6plex [N-Term; K10; K11]	0.000141241	0	1	1	1	Q96HE7	1	2138.28	High	Not Found	High	High	High	High	High	High	High	14.2		33.2	31	119.8	59.3	162.2	78.8	32.8	Unique	31.45	High	0	0.0001428
FALSE	High	MPCPQGCPESLHELMNLCWK	3xTMT6plex [N-Term; S10; K20]; 3xCarbamidomethyl [C3; C7; C18]	3.9203e-05	0	1	2	1	J3QRU1	0	3174.56	High	Not Found	High	High	High	High	High	High	High	200.1		43.2	98	160.1	106.9	96.5	89.9	75.7	Unique	30.36	High	0	4.08e-05
FALSE	High	MSNYDTDLFVPYFEAIQK	2xTMT6plex [N-Term; K18]	8.58306e-06	0	1	2	2	P49588	0	2639.35	High	Not Found	High	High	High	High	High	High	High	139.1		109.1	51.8	70.5	172.6	58.1	57.3	76.7	Unique	36.14	High	0	9.303e-06
FALSE	High	IAVIADLDTESR	1xTMT6plex [N-Term]	6.755e-05	0	1	4	1	Q8WVQ1	0	1531.85	High	High	High	High	High	High	High	High	High	72.7	1.7	1.9	24.8	49.7	7.8	56.5	28.2	6.9	Unique	51.58	High	0	6.98e-05
FALSE	High	MSPDEGQEELEEVQAELK	2xTMT6plex [N-Term; K18]	1.42101e-05	0	1	3	2	Q9HC07	0	2519.26	High	Not Found	High	High	High	High	High	High	High	293.9		44.2	114.1	167.4	54.8	195.5	102.7	42.1	Unique	57.32	High	0	6.841e-05
FALSE	High	LDGAQLDGDLSLADKDVTAK	3xTMT6plex [N-Term; K15; K20]	0.000108103	0	1	2	1	Q8IVF2	1	2732.53	High	Not Found	High	High	High	High	High	High	High	183.5		149.9	82.8	127.8	186.2	89.5	67.5	137.4	Unique	36.7	High	0	0.0001103
FALSE	High	VDINAPDVGVQGPDWHLK	2xTMT6plex [N-Term; K18]	1.08026e-08	0	1	1	2	Q09666	0	2418.32	High	Not Found	High	High	High	High	High	High	High	305.3		174.4	144.2	181.3	207.9	193.6	123.6	155.8	Unique	66.36	High	0	1.773e-08
FALSE	High	DAANLLNDALAIR	1xTMT6plex [N-Term]	2.82978e-05	0	2	16	1	Q07866-3; Q07866-9	0	1598.91	High	High	High	High	High	High	High	High	High	82.9	3.3	38.3	31.6	35.3	48	47.1	30	25.5	NotUnique	65.11	High	0	2.98e-05
FALSE	High	ETEAALEFAQTQLAEQGEESR	1xTMT6plex [N-Term]	2.48478e-07	0	1	1	1	Q9NWU2	0	2566.25	High	Not Found	High	High	High	High	High	High	High	44.6		19.4	14.6	15.3	31	18.2	10.9	21.8	Unique	66.98	High	0	2.932e-07
FALSE	High	GNGGVYGWDLK	2xTMT6plex [N-Term; K11]; 1xDeamidated [N2]	8.04422e-05	0	1	3	1	H0Y368	0	1624.87	High	High	High	High	High	High	High	High	High	137	0.8	34.6	55.1	40.4	55.1	50.5	29	49.7	Unique	51.34	High	0	8.276e-05
FALSE	High	YSETLKPDNFEESGYTFIAPR	2xTMT6plex [N-Term; K6]	1.45989e-08	0	2	4	1	P54289-4; P54289	0	2922.49	High	Not Found	High	High	High	High	High	High	High	153.7		51.3	80.1	130.7	56.4	128.5	72.3	38	NotUnique	64.82	High	0	1.848e-08
FALSE	High	DPYTGQSVSLFQALKK	3xTMT6plex [N-Term; K15; K16]	8.43585e-07	0	3	9	1	Q15149-4; Q15149; Q15149-3	1	2469.43	High	Not Found	High	High	High	High	High	High	High	10.8		63.8	39.4	83.8	73.4	83.8	64.6	42.2	NotUnique	57.46	High	0	9.656e-07
FALSE	High	EFLVAGGEDFK	2xTMT6plex [N-Term; K11]	6.29827e-05	0	1	3	1	Q9Y3F4-2	0	1669.92	High	Not Found	High	High	High	High	High	High	High	430.6		155.6	169	107.7	155.1	153.4	118.7	135.8	Unique	55.66	High	0	6.484e-05
FALSE	High	ILITGGAGFVGSHLTDK	3xTMT6plex [N-Term; T15; K17]	3.183e-08	0	1	3	1	Q8NBZ7-2	0	2373.41	High	Not Found	High	High	High	High	High	High	High	131.7		18.4	42.5	90.7	35.2	107.9	63.9	29.6	Unique	38.17	High	0	3.965e-08
FALSE	High	ILITGGAGFVGSHLTDK	2xTMT6plex [N-Term; K17]	5.51236e-08	0	1	3	1	Q8NBZ7-2	0	2144.25	High	Not Found	High	High	High	High	High	High	High	95.9		37.4	77.3	40.6	14.3	60.5	35.9	19	Unique	44.92	High	0	6.793e-08
FALSE	High	QQPLTELAAHGDLVQSAVWSR	1xTMT6plex [N-Term]	9.2945e-06	0	1	5	1	P57737-3	0	2535.35	High	Not Found	High	High	High	High	High	High	High	27.9		13.4	8.6	13.6	20.2	15.6	8.6	8.8	Unique	51.34	High	0	1.006e-05
FALSE	High	APDVDVNIAGPDAALKVDVK	3xTMT6plex [N-Term; K16; K20]	8.21189e-08	0	1	1	1	Q09666	1	2694.56	High	Not Found	High	High	High	High	High	High	High										NoQuanValues	62.53	High	0	1.004e-07
FALSE	High	VEFVHMLNATMCATTR	1xTMT6plex [N-Term]; 1xCarbamidomethyl [C12]	1.72601e-05	0	2	2	2	Q5T5C7; P49591	0	2110.04	High	High	High	High	High	High	High	High	High	218.7	3.6	80.4	126.2	87.1	82.3	58.4	88.1	111.1	NotUnique	60.94	High	0	1.838e-05
FALSE	High	ASNLENSTYDLYTIPK	2xTMT6plex [N-Term; K16]	5.52247e-05	0	1	2	1	P53621	0	2287.22	High	Not Found	High	High	High	High	High	High	High	195		130.8	90.5	89.9	147.3	107.6	59.3	78.9	Unique	44.22	High	0	5.701e-05
FALSE	High	EAHLPPGAMAAVGLSWEECK	2xTMT6plex [N-Term; K20]; 1xCarbamidomethyl [C19]	6.40816e-08	0	1	2	1	P49327	0	2611.34	High	Not Found	High	High	High	High	High	High	High	175.5		59.8	85	67.6	95.3	103	78	51.2	Unique	72.46	High	0	7.844e-08
FALSE	High	MPCPQGCPESLHELMNLCWK	2xTMT6plex [N-Term; K20]; 3xCarbamidomethyl [C3; C7; C18]	3.04671e-06	0	1	2	1	J3QRU1	0	2945.4	High	High	High	High	High	High	High	High	High	61.4	1.1	60.2	121.9	34.3	24	22.4	13.8	19.2	Unique	57.77	High	0	3.371e-06
FALSE	High	IIQGQGVDEPLSETGFK	2xTMT6plex [N-Term; K17]	7.19268e-07	0	1	1	1	Q9NQ88	0	2276.25	High	Not Found	High	High	High	High	High	High	High	134		112	66.7	52.4	146.2	39.3	38.8	46.6	Unique	51.18	High	0	8.269e-07
FALSE	High	ESVELPLTHPEYYEEMGIKPPK	3xTMT6plex [N-Term; K19; K22]	1.24521e-07	0	1	3	2	P62191	0	3273.77	High	Not Found	High	High	High	High	High	High	High	208.2		154	98.2	80.5	181.2	80.6	62.7	87.6	Unique	38.13	High	0	1.496e-07
FALSE	High	LGEAAALENNTGSEATGPSRPLPDAPHGVMDSGLPWSK	2xTMT6plex [N-Term; K38]	1.34803e-08	0	1	1	1	A1X283	0	4288.17	High	Not Found	High	High	High	High	High	High	High	38.6		27.6	28.6	27.3	24.6	24.6	14	14.2	Unique	73.1	High	0	1.724e-08
FALSE	High	IWEQIQPDLHTNDECVATYK	2xTMT6plex [N-Term; K20]; 1xCarbamidomethyl [C15]	7.11879e-05	0	1	2	1	Q12904-2	0	2918.48	High	Not Found	High	High	High	High	High	High	High	128.4		63.7	32	50.8	70	39.7	28.3	33.2	Unique	80.65	High	0	7.327e-05
FALSE	High	GLATSLQNDLQEVPK	2xTMT6plex [N-Term; K15]	2.45727e-05	0	1	1	1	Q8N0X7	0	2071.18	High	Not Found	High	High	High	High	High	High	High	234.4		123.7	104.1	89.9	160.8	151	92.6	106.2	Unique	57.4	High	0	2.592e-05
FALSE	High	FAIQDISVEETSAK	2xTMT6plex [N-Term; K14]	6.81433e-05	0	4	15	3	P35609-2; H9KV75; P12814; O43707	0	1996.1	High	Not Found	High	High	High	High	High	High	High	239.2		160.4	84.2	94.2	181.9	86.8	66.6	89.5	NotUnique	67.5	High	0.000157	0.0006919
FALSE	High	ALPCIVDVRDEQQISAAVEK	2xTMT6plex [N-Term; K20]; 1xCarbamidomethyl [C4]	3.90396e-06	0	1	2	1	Q6YN16	1	2699.48	High	Not Found	High	High	High	High	High	High	High	73		60.2	68.3	135.2	100.2	95.2	51.2	63.5	Unique	51.73	High	0	4.325e-06
FALSE	High	FMELLEPLNER	1xTMT6plex [N-Term]	0.000146173	0	2	4	1	Q01082; Q01082-3	0	1619.87	High	High	High	High	High	High	High	High	High	221.8	7.6	93.6	78.6	101.1	129.3	103.3	60.2	93.9	NotUnique	59.79	High	0	0.0001482
FALSE	High	NTVHDQEHIMEHLEGVINKPEAEMSPQELQLHYFK	3xTMT6plex [N-Term; K19; K35]	2.2949e-06	0	2	2	1	Q8NI22; H7BZ18	0	4858.49	High	Not Found	High	High	High	High	High	High	High	164.9		23.6	46.2	107	43.1	116.1	57.6	29	NotUnique	19.44	High	0	2.565e-06
FALSE	High	IPFNQALVFSNLHSR	1xTMT6plex [N-Term]	4.02516e-05	0	1	1	1	Q9UHI6	0	1972.1	High	High	High	High	High	High	High	High	High	47.2	6.5	47.1	39.2	37.8	22.6	37.1	23.5	16.4	Unique	44.57	High	0	4.194e-05
FALSE	High	DSLSNATPCAVLRPSGAVVTLECVEK	2xTMT6plex [N-Term; K26]; 2xCarbamidomethyl [C9; C23]	2.04484e-07	0	1	2	1	Q9Y314	0	3231.71	High	Not Found	High	High	High	High	High	High	High	7.5		1.4	8.9	10.6	5.2	12.6	10.2	7.8	Unique	69.11	High	0	2.424e-07
FALSE	High	NVEQSSDLQDQLNHLLK	2xTMT6plex [N-Term; K17]	4.61915e-06	0	1	2	1	A0A0B4J1R7	0	2439.32	High	Not Found	High	High	High	High	High	High	High	33.4		12.7	9.5	22.4	19	15.4	13.1	9.4	Unique	45.36	High	0	5.085e-06
FALSE	High	VPVSVNLLSK	2xTMT6plex [N-Term; K10]	9.9988e-05	0	1	3	1	O76021	0	1513.97	High	Not Found	High	High	High	High	High	High	High	74.1		2.2	40.3	17.2	26.6	22.4	18.4	21.9	Unique	67.48	High	0	0.0001021
FALSE	High	DYELQLVTYK	2xTMT6plex [N-Term; K10]	0.000130724	0	3	9	1	Q15149-4; Q15149; Q15149-3	0	1729.98	High	Not Found	High	High	High	High	High	High	High	389		111.9	101.2	73.4	133.7	85.3	60.2	110.7	NotUnique	59.54	High	0	0.0001334
FALSE	High	MKEHQEDPEMLIDLMYR	2xTMT6plex [N-Term; K2]	8.21159e-06	0	2	9	1	Q96HP0; Q96N67	1	2636.33	High	Not Found	High	High	High	High	High	High	High	193.5		138	126	186.9	207.4	162.4	106.6	131.3	NotUnique	41.9	High	0	8.899e-06
FALSE	High	GHCYLLSAPGPHALLLVTQLGR	1xTMT6plex [N-Term]; 1xCarbamidomethyl [C3]	4.61911e-07	0	2	2	1	Q8WWP7; A0A087WTJ2	0	2602.45	High	High	High	High	High	High	High	High	High	28.1	6.1	18.6	26.2	24.9	20.2	19.8	13.9	19.1	NotUnique	78.16	High	0	5.405e-07
FALSE	High	TATEEWGTEDWNEDLSETK	2xTMT6plex [N-Term; K19]	1.38485e-07	0	3	9	2	Q14157-1; F8W726; Q14157-5	0	2699.27	High	Not Found	High	High	High	High	High	High	High	328.8		131.9	169.7	314.1	236.9	368.8	236.9	197.3	NotUnique	63.79	High	0	1.662e-07
FALSE	High	KLFIGGLSFETTDDSLREHFEK	3xTMT6plex [N-Term; K1; K22]	2.11485e-05	0	1	2	1	P51991	2	3256.78	High	Not Found	High	High	High	High	High	High	High	25.3		5.8	46.6	71.2	17.3	29.7	30.1	17	Unique	57.67	High	0	2.237e-05
FALSE	High	SSEPVQLTEAETEYFVR	1xTMT6plex [N-Term]	3.32714e-08	0	1	2	1	Q9UBF2	0	2214.11	High	Not Found	High	Not Found	High	High	Not Found	Not Found	Not Found	3.9		6.3		2.8	6.4				Unique	100.1	High	0	4.129e-08
FALSE	High	ELKEALGIPAAASFK	3xTMT6plex [N-Term; K3; K15]	7.70089e-05	0	1	2	1	P31939	1	2232.36	High	Not Found	High	High	High	High	High	High	High	76.7		169.1	88.9	190.8	351.9	153	137.4	124.6	Unique	33.32	High	0	7.894e-05
FALSE	High	DKTQYIFNNMVLK	3xTMT6plex [N-Term; K2; K13]	7.06464e-06	0	1	1	1	Q16706	1	2301.32	High	Not Found	High	High	High	High	High	High	High	345.6		61.8	182.5	357.3	97.6	340.5	173.8	69	Unique	45.35	High	0	7.677e-06
FALSE	High	EMQDVDLAEVKPLVEK	3xTMT6plex [N-Term; K11; K16]	1.44798e-06	0	1	9	1	Q92597	0	2530.44	High	Not Found	High	High	High	High	High	High	High	329.1		247.3	114.5	108.9	335.5	154.7	108.6	254.2	Unique	50.9	High	0	1.636e-06
FALSE	High	EQLAQAMFDHIPVGVGSK	2xTMT6plex [N-Term; K18]	6.18726e-07	0	1	1	2	Q9Y3I0	0	2385.3	High	High	High	High	High	High	High	High	High	746.8	4.3	251.3	331.5	235.5	250.5	256.6	204.8	249.1	Unique	45.53	High	0	7.149e-07
FALSE	High	EMDPEIDIMCTGPEAGNTEEK	2xTMT6plex [N-Term; K21]; 1xCarbamidomethyl [C10]	1.87151e-07	0	1	1	1	Q14571	0	2824.31	High	Not Found	High	High	High	High	High	High	High	136.3		57.6	77.4	84.8	94	60	45	60	Unique	64.57	High	0	2.233e-07
FALSE	High	MLCDTWCIEAAAR	1xTMT6plex [N-Term]; 2xCarbamidomethyl [C3; C7]	5.4171e-06	0	1	5	1	P49748-3	0	1825.86	High	Not Found	High	High	High	High	High	High	High	40.4		12.8	15.5	19.7	19.1	19.8	16.9	20.6	Unique	79.11	High	0	5.934e-06
FALSE	High	NFALLGVGTSK	2xTMT6plex [N-Term; K11]	6.75883e-06	0	1	3	1	A0AVT1	0	1564.95	High	Not Found	High	High	High	High	High	High	High	135.4		25.1	23.5	42.6	94.4	41.4	28.6	41.6	Unique	59.35	High	0	7.384e-06
FALSE	High	DLAQINDLQAQLEEANKEK	3xTMT6plex [N-Term; K17; K19]	5.5614e-08	0	1	6	1	Q92614	1	2857.59	High	High	High	High	High	High	High	High	High	7.4	2	7.6	5.9	9.7	6.5	6.6	2.1	6.3	Unique	42.31	High	0	6.853e-08
FALSE	High	RFSTEYELQQLEQFK	2xTMT6plex [N-Term; K15]	1.78811e-05	0	1	1	1	P15144	1	2404.29	High	Not Found	High	High	High	High	High	High	High	399		100.7	145	150	112.1	59.8	39.6	25.6	Unique	45.5	High	0	1.903e-05
FALSE	High	SCYLSSLDLLLEHR	1xTMT6plex [N-Term]; 1xCarbamidomethyl [C2]	2.04484e-07	0	1	1	1	Q9BQ69	0	1935.02	High	High	High	High	High	High	High	High	High	93.6	1.6	41.2	61.4	67.5	77.5	53.3	37.4	63.7	Unique	63.57	High	0	2.43e-07
FALSE	High	GISLNPEQWSQLKEQISDIDDAVR	2xTMT6plex [N-Term; K13]	7.30785e-05	0	1	1	1	P53999	1	3199.7	High	High	High	High	High	High	High	High	High	2.1	2.9	71.8	4.7	43.1	38	52.7	25.4	8.8	Unique	38.71	High	0	7.541e-05
FALSE	High	FDAIYETEMSK	2xTMT6plex [N-Term; K11]	6.13496e-05	0	1	1	1	O43704	0	1791.92	High	Not Found	High	High	High	High	High	High	High	88.1		16.9	24.8	20.5	49.7	25.2	10.8	24.1	Unique	65.94	High	0	6.331e-05
FALSE	High	EAFEEAGVLLLRPR	1xTMT6plex [N-Term]	2.76343e-07	0	1	1	2	A8MXV4	0	1829.05	High	High	High	High	High	High	High	High	High	163.8	4.6	81.5	75	124.2	103.3	98.1	54.4	79.9	Unique	71.17	High	0	5.959e-07
FALSE	High	LNTFGDEVFNDPK	2xTMT6plex [N-Term; K13]	1.01542e-05	0	1	1	2	P11047	0	1954.03	High	Not Found	High	High	High	High	High	High	High	246.2		18.8	106	200.7	55.4	184.6	98.7	32.5	Unique	41.63	High	0	1.091e-05
FALSE	High	RVEDEVNSGVGQDGSLLSSPFLK	2xTMT6plex [N-Term; K23]	9.79228e-11	0	1	1	1	L0R6Q1	1	2891.55	High	Not Found	High	High	High	High	High	High	High	168.2		78.5	119.2	141.2	121.5	114.1	83.2	112.7	Unique	100.82	High	0	1.41e-10
FALSE	High	LGPQDSDPTEANLESADPELCIR	1xTMT6plex [N-Term]; 1xCarbamidomethyl [C21]	6.94231e-07	0	1	3	1	Q27J81	0	2756.32	High	High	High	High	High	High	High	High	High	91.7	2.8	42.9	34.2	30.2	53.3	35.2	22.3	29.6	Unique	59.51	High	0	7.987e-07
FALSE	High	IKELVVTQLGYDTR	2xTMT6plex [N-Term; K2]	1.04273e-05	0	1	4	2	Q01813	1	2093.24	High	Not Found	High	High	High	High	High	High	High	171.8		298.4	130.7	211	421.7	256.6	170.9	175.4	Unique	66.79	High	0	1.127e-05
FALSE	High	ETPSFGVYFLTYDALTR	1xTMT6plex [N-Term]	1.21192e-05	0	1	3	1	Q8N8R3	0	2209.14	High	Not Found	High	High	High	High	High	High	High	29.7		20.7	21.8	30.8	32.7	21.1	16.1	23.6	Unique	41.46	High	0	1.304e-05
FALSE	High	FYQNVSITQGEGGFEINLDHR	1xTMT6plex [N-Term]	2.68997e-08	0	1	2	1	Q8N5M1	0	2653.32	High	High	High	High	High	High	High	High	High	56.7	0.9	22	25.8	46	43.5	41.6	25.8	38.1	Unique	74.96	High	0	3.358e-08
FALSE	High	ISMPDVGLNLKAPK	3xTMT6plex [N-Term; K11; K14]	9.13147e-06	0	1	1	2	Q09666	1	2170.32	High	Not Found	High	High	High	High	High	High	High	261.8		104.7	127.8	324.7	243.3	252.9	161.7	119	Unique	38.72	High	0	9.877e-06
FALSE	High	LESLCLSMTEHALGDGVDR	1xTMT6plex [N-Term]; 1xCarbamidomethyl [C5]	5.51387e-06	0	2	4	1	Q9UPU9; G3V2R1	0	2332.15	High	Not Found	High	High	High	High	High	High	High	14		13.9	13	6.2	16.1	14.2	6.4	11.2	NotUnique	41.28	High	0	6.045e-06
FALSE	High	LALASLGYEK	2xTMT6plex [N-Term; K10]	5.92369e-05	0	1	3	1	Q8WUM4	0	1522.92	High	Not Found	High	High	High	High	High	High	High	432.1		210.1	189.3	168.4	328.9	204	115.7	145.6	Unique	60.31	High	0	6.093e-05
FALSE	High	EVESFQQLLNAR	1xTMT6plex [N-Term]	1.10934e-05	0	1	2	1	Q8N1B4	0	1662.9	High	Not Found	High	High	High	High	High	High	High	20.1		6.6	10	12	8.6	10.1	11.1	8.9	Unique	74.37	High	0	1.193e-05
FALSE	High	ANIVHLMLSSPEQIQK	2xTMT6plex [N-Term; K16]	2.66775e-06	0	1	4	1	P55060	0	2266.3	High	Not Found	High	High	High	High	High	High	High	224.5		88.7	146.9	64.9	100.7	104.1	73.6	69.6	Unique	44.53	High	0	2.985e-06
FALSE	High	AIVAIENPADVSVISSR	1xTMT6plex [N-Term]	1.07148e-06	0	1	4	4	A0A0C4DG17	0	1970.11	High	High	High	High	High	High	High	High	High	405.2	37.6	128.6	210.8	288.1	220	399.6	263.2	190	Unique	78.87	High	0	3.086e-06
FALSE	High	AIVAIENPADVSVISSR	2xTMT6plex [N-Term; S]	8.21159e-06	0	1	4	2	A0A0C4DG17	0	2199.27	High	Not Found	High	High	High	High	High	High	High	39.4		10.2	9.3	34.7	28.7	41.1	31.7	28.1	Unique	47.77	High	0	8.902e-06
FALSE	High	RAEEIWQQSVIGDYLAR	1xTMT6plex [N-Term]	1.61034e-06	0	1	4	1	P17480	1	2263.2	High	High	High	High	High	High	High	High	High	41.7	1.1	14.4	31.7	24	28.3	33.2	28.8	24.9	Unique	72.06	High	0	1.817e-06
FALSE	High	LVIIESDLER	1xTMT6plex [N-Term]	0.000112884	0	2	20	1	H7BYY1; P09493-3	0	1415.83	High	High	High	High	High	High	High	High	High	147.4	12.4	96.2	57.8	62.7	101.3	36.9	27	35.8	NotUnique	74.56	High	0	0.0001154
FALSE	High	VIELTGDVTPDMK	2xTMT6plex [N-Term; K13]	5.47425e-05	0	1	1	1	Q8N3C0	0	1876.05	High	High	High	High	High	High	High	High	High	318.1	4.5	177.3	171.9	203	212.7	209.8	147.4	136.8	Unique	33.79	High	0	5.658e-05
FALSE	High	APWIEQEGPEYWDEETGKVK	3xTMT6plex [N-Term; K18; K20]	3.47648e-09	0	1	2	1	P05534	1	3078.6	High	Not Found	High	High	High	High	High	High	High	16.9		6.8	28.2	125.5	15.9	150.8	58.3	10.1	Unique	76.92	High	0	4.583e-09
FALSE	High	IATSLDGFDVASVQQQR	1xTMT6plex [N-Term]	8.21189e-08	0	1	5	1	O60664	0	2064.09	High	High	High	High	High	High	High	High	High	170	3.3	92.2	43.1	52.2	129.6	65.8	34.5	48.8	Unique	54.72	High	0	9.974e-08
FALSE	High	GFESPSDNSSAMLLQWHEK	2xTMT6plex [N-Term; K19]; 1xOxidation [M12]	5.28547e-05	0	1	3	1	O15511	0	2637.3	High	Not Found	High	High	High	High	High	High	High	21.9		24.2	20.9	23.2	20.8	23.5	16.8	13.9	Unique	37.23	High	0	5.478e-05
FALSE	High	GFESPSDNSSAMLLQWHEK	2xTMT6plex [N-Term; K19]; 1xDeamidated [N8]	9.71699e-08	0	1	3	1	O15511	0	2622.29	High	High	High	High	High	High	High	High	High	66.5	3.3	66.6	71.5	75.9	70	87.2	63.9	43.1	Unique	63.26	High	0	1.174e-07
FALSE	High	IINYNVEQECNNFLR	1xTMT6plex [N-Term]; 1xCarbamidomethyl [C10]	5.57112e-05	0	1	2	1	Q12768	0	2155.08	High	High	High	High	High	High	High	High	High	68.3	2.7	37	28.8	37.8	57.6	35.1	18.6	32.4	Unique	34.62	High	0	5.737e-05
FALSE	High	QYASLTGTQALPPLFSLGYHQSR	2xTMT6plex [N-Term; S]	6.2968e-06	0	2	4	3	Q14697; Q14697-2	0	2993.62	High	Not Found	High	High	High	High	High	High	High	633.6		270.9	324.1	408.3	229.2	329.9	214.7	176.7	NotUnique	45.44	High	0	6.845e-06
FALSE	High	QYASLTGTQALPPLFSLGYHQSR	1xTMT6plex [N-Term]	1.27874e-07	0	2	4	2	Q14697; Q14697-2	0	2764.46	High	High	High	High	High	High	High	High	High	194.9	33.4	181	226.8	101.7	62.1	79.8	46.8	55.2	NotUnique	67.41	High	0	1.546e-07
FALSE	High	LLNPDDLREEIVK	2xTMT6plex [N-Term; K13]	1.14929e-05	0	1	2	1	Q86XL3	1	2012.18	High	Not Found	High	High	High	High	High	High	High	220		210.7	155	166.1	243.4	192	125.2	188.8	Unique	58.08	High	0	1.238e-05
FALSE	High	YWLCAATGPSIK	2xTMT6plex [N-Term; K12]; 1xCarbamidomethyl [C4]	7.51614e-06	0	1	10	4	P63244	0	1825.01	High	High	High	High	High	High	High	High	High	725.1	1.2	195.2	288.2	521.7	311.5	534.5	426.7	335.1	Unique	42.11	High	0	8.143e-06
FALSE	High	GEVFSVLEFAPSNHSFK	3xTMT6plex [N-Term; S15; K17]	8.35821e-06	0	1	2	1	Q9C0C9	0	2582.42	High	Not Found	High	High	High	High	High	High	High	96.8		43.1	46.6	57.1	86.9	50.3	41.1	40.2	Unique	32.48	High	0	9.083e-06
FALSE	High	INEANQLMQYDQCLTK	2xTMT6plex [N-Term; K16]; 1xCarbamidomethyl [C13]	2.62092e-06	0	1	3	1	Q86SF2	0	2427.24	High	Not Found	High	High	High	High	High	High	High	120.8		15.9	43.4	74.5	26.4	66.3	34.7	20.3	Unique	43.84	High	0	2.928e-06
FALSE	High	GFVLQDTVEQLR	1xTMT6plex [N-Term]	1.62467e-06	0	1	4	2	P56192	0	1633.91	High	High	High	High	High	High	High	High	High	245.4	51.2	159	92.1	104	162.9	114.7	88	115.1	Unique	89.59	High	0	1.828e-06
FALSE	High	WSEGPCGSPGSPGSNIEGFVCK	2xTMT6plex [N-Term; K22]; 2xCarbamidomethyl [C6; C21]	6.18039e-10	0	1	1	1	Q9NPY3	0	2767.32	High	High	High	High	High	High	High	High	High	240.4	1.4	28.2	110.6	150.6	50	153.9	117.9	28.1	Unique	83.38	High	0	8.539e-10
FALSE	High	MIGGLFIYNHK	2xTMT6plex [N-Term; K11]	4.434e-05	0	1	9	2	E9PFW3	0	1751.01	High	Not Found	High	High	High	High	High	High	High	216.6		136.1	126.6	178.8	175.6	191.9	107.6	135.8	Unique	31.85	High	0	4.614e-05
FALSE	High	KDALLSALSIQNYHLECNETK	3xTMT6plex [N-Term; K1; K21]; 1xCarbamidomethyl [C17]	1.24474e-08	0	2	4	1	Q01082; Q01082-3	1	3134.71	High	Not Found	High	High	High	High	High	High	High	60.5		34.4	25	29.4	27.8	20.9	10.6	27.8	NotUnique	69.83	High	0	1.592e-08
FALSE	High	MQEVVANLQYDDGSGMK	2xTMT6plex [N-Term; K17]	3.90396e-06	0	1	2	1	Q16531	0	2343.17	High	Not Found	High	High	High	High	High	High	High	144.7		63.4	76.1	74.6	147.2	58.4	50.1	80	Unique	56.34	High	0	4.327e-06
FALSE	High	IINEPTAAAIAYGLDKR	2xTMT6plex [N-Term; K16]	1.31317e-07	0	1	1	3	P11021	1	2274.32	High	Not Found	High	High	High	High	High	High	High	259.7		107.2	114	353.6	189.2	370.5	196.5	105	Unique	54.77	High	0	1.582e-07
FALSE	High	YLVNPEGQVVK	2xTMT6plex [N-Term; K11]	1.21192e-05	0	1	2	2	Q8TED1	0	1704.01	High	Not Found	High	High	High	High	High	High	High	465		100.4	178	285	120.4	316.7	163.9	94.6	Unique	68.12	High	0	1.299e-05
FALSE	High	HVVFGEVTEGLDVLR	1xTMT6plex [N-Term]	3.20149e-05	0	1	5	1	Q9UNP9-3	0	1899.05	High	Not Found	High	High	High	High	High	High	High	42.7		20.2	24.1	25.3	47.4	35.8	24	23.7	Unique	40.92	High	0	3.345e-05
FALSE	High	RLEDLIQGLTGEKPR	2xTMT6plex [N-Term; K13]	1.41002e-06	0	1	3	1	A5PLL7	1	2183.29	High	Not Found	High	High	High	High	High	High	High	85.9		55.8	48.2	52.6	65.1	44.3	34.6	54.9	Unique	51.61	High	0	1.601e-06
FALSE	High	NLQEEIDALESR	1xTMT6plex [N-Term]	5.18256e-06	0	1	2	1	Q9NQP4	0	1645.86	High	Not Found	High	High	High	High	High	High	High	73.8		46.9	23.9	45.2	85.3	56.1	36.9	36.7	Unique	85.89	High	0	5.667e-06
FALSE	High	TFDTNGDGTIDFR	1xTMT6plex [N-Term]; 1xDeamidated [N5]	4.45843e-06	0	1	2	2	P37235	0	1688.8	High	High	High	High	High	High	High	High	High	124.1	1.3	25.7	41.2	31.8	44.1	24.1	21.5	35.3	Unique	59.12	High	0	4.914e-06
FALSE	High	IAEENGAAFAGGTSLIQK	2xTMT6plex [N-Term; K18]	1.19163e-06	0	1	2	1	Q9BYD6	0	2235.24	High	Not Found	High	High	High	High	High	High	High	11.6		0.3	2.7	8.2	10.9	8.4	1	5.7	Unique	58.28	High	0	1.357e-06
FALSE	High	GGPGGPGGPGGPMGR	1xTMT6plex [N-Term]	1.82175e-08	0	1	9	1	Q01844-5	0	1436.73	High	High	High	High	High	High	High	High	High	12.9	7	8.6	52.1	32.6	19.4	83.7	44	19.6	Unique	82.25	High	0	2.309e-08
FALSE	High	SSFYVNGLTLGGQK	2xTMT6plex [N-Term; K14]; 1xDeamidated [N6]	1.97293e-08	0	1	3	5	P07737	0	1930.07	High	High	High	High	High	High	High	High	High	1229.3	2.7	748.7	357.7	570.5	1384.5	422.9	374	576.3	Unique	103.91	High	0	2.486e-08
FALSE	High	SSFYVNGLTLGGQK	2xTMT6plex [N-Term; K14]	1.38526e-06	0	1	3	1	P07737	0	1929.08	High	Not Found	High	High	High	High	High	High	High	94.3		55.3	22.5	49.8	119.9	38.3	26.9	48.3	Unique	59.01	High	0	1.569e-06
FALSE	High	IAEENGAAFAGGTSLIQK	2xTMT6plex [N-Term; K18]; 1xDeamidated [N5]	1.83613e-05	0	1	2	1	Q9BYD6	0	2236.22	High	Not Found	High	High	High	High	High	High	High	130.8		76	82.8	113.5	96.4	112.5	74.7	106.3	Unique	70.46	High	0	1.952e-05
FALSE	High	AMGAAQVVVTDLSATR	1xTMT6plex [N-Term]	5.32204e-06	0	1	2	1	Q00796	0	1818.99	High	High	High	High	High	High	High	High	High	71.9	8.2	69	35	45.3	69.8	97.3	51	32.7	Unique	57.48	High	0	5.851e-06
FALSE	High	LLYEALVDCKK	3xTMT6plex [N-Term; K10; K11]; 1xCarbamidomethyl [C9]	9.91238e-05	0	1	5	1	Q7L2H7	1	2039.22	High	Not Found	High	High	High	High	High	High	High	219.9		245.8	179.8	271.1	247.5	297.3	213.5	167.7	Unique	39.39	High	0	0.0001017
FALSE	High	VHEVPDYSMAYGNPGVADATPPWSSYK	2xTMT6plex [N-Term; K27]; 1xDeamidated [N13]	2.57491e-06	0	1	2	1	Q96T49	0	3397.65	High	Not Found	High	High	High	High	High	Not Found	High	8.7		8.2	6.4	2.8	11.2	1.3		7.4	Unique	61.18	High	0	2.875e-06
FALSE	High	VPNDDMDIFSK	2xTMT6plex [N-Term; K11]	9.74173e-05	0	1	3	1	A0A096LP25	0	1738.91	High	High	High	High	High	High	High	High	High	83.3	2.6	68.3	56.6	59	74.7	72.6	51.6	46.4	Unique	59.11	High	0	9.947e-05
FALSE	High	DTTINEIEDTFR	1xTMT6plex [N-Term]	3.68604e-05	0	1	2	2	Q16864-2	0	1682.84	High	High	High	High	High	High	High	High	High	118.1	3.6	61.8	43.1	68	85.3	61.2	50.8	61.3	Unique	69.03	High	0	3.858e-05
FALSE	High	GFESPSDNSSAMLLQWHEK	2xTMT6plex [N-Term; K19]	1.08026e-08	0	1	3	2	O15511	0	2621.31	High	Not Found	High	High	High	High	High	High	High	117		114.3	121.2	127.7	104.7	149.6	96	87.1	Unique	75.77	High	0	1.38e-08
FALSE	High	LHSLLGDYYQAIK	2xTMT6plex [N-Term; K13]	5.14813e-05	0	1	4	1	B0QY89	0	1979.14	High	Not Found	High	High	High	High	High	High	High	340.7		86.6	85.7	139.5	100.6	93	98.9	92.4	Unique	44.9	High	0	5.333e-05
FALSE	High	IAYQLAVEAESEQK	2xTMT6plex [N-Term; K14]	7.70089e-05	0	1	2	1	P35606	0	2037.13	High	Not Found	High	High	High	High	High	High	High	290.5		174.4	113.9	145.3	179.3	121.7	88	87.5	Unique	22.24	High	0	7.904e-05
FALSE	High	EQLWLANEGLITR	1xTMT6plex [N-Term]	1.80636e-07	0	1	4	1	P46940	0	1771.99	High	High	High	High	High	High	High	High	High	83.1	2.9	79.7	51.2	50.6	78.6	62	42	45.9	Unique	85.95	High	0	2.147e-07
FALSE	High	CPTQFPLILWHPYAR	1xTMT6plex [N-Term]; 1xCarbamidomethyl [C1]	1.09957e-05	0	1	2	1	Q96TA1	0	2128.14	High	Not Found	High	High	High	High	High	High	High	38.1		15.5	10.2	23.6	24.8	12.2	8.1	10.6	Unique	53.39	High	0	1.183e-05
FALSE	High	LEVDAIVNAANSSLLGGGGVDGCIHR	2xTMT6plex [N-Term; S13]; 1xDeamidated [N11]; 1xCarbamidomethyl [C23]	8.97542e-07	0	1	1	1	Q9BQ69	0	3053.61	High	Not Found	High	High	High	High	High	High	High	30.4		3.8	12.1	15.7	21.8	13.5	10.2	11.9	Unique	80.11	High	0	1.029e-06
FALSE	High	VLEEHGEWWK	2xTMT6plex [N-Term; K10]	0.000116857	0	2	3	1	P07948; P07948-2	0	1770.96	High	High	High	High	High	High	High	High	High	315.6	104.8	281.8	201.1	183.9	293.3	248.3	171	235.4	NotUnique	36.89	High	0	0.0001193
FALSE	High	VYIGSFWSQPLLVPDNRR	1xTMT6plex [N-Term]	1.47215e-05	0	1	2	2	Q9NZN4	1	2376.3	High	High	High	High	High	High	High	High	High	9.4	1.3	37.3	21.2	35.1	35.9	23.7	27.9	26.4	Unique	48.61	High	0	1.569e-05
FALSE	High	SSGLPNIPVQTISR	1xTMT6plex [N-Term]	1.51311e-07	0	1	2	1	P02786	0	1697.97	High	High	High	High	High	High	High	High	High	222.2	0.8	4.3	66.4	115.7	26.9	186.7	111.1	29.7	Unique	86.83	High	0	1.814e-07
FALSE	High	AGDMENAENILTVMR	1xTMT6plex [N-Term]	6.2968e-06	0	1	4	1	P42704	0	1892.94	High	High	High	High	High	High	High	High	High	293.2	11.3	76.9	105.8	126.1	104.6	120.7	68.1	100.4	Unique	58.24	High	0	6.859e-06
FALSE	High	ALQNAVTTFVNR	1xTMT6plex [N-Term]	2.66775e-06	0	1	2	1	O14964	0	1562.89	High	High	High	High	High	High	High	High	High	49.5	3.1	33.5	24	35.8	34.3	40.4	18.9	18.7	Unique	75.01	High	0	2.964e-06
FALSE	High	LVFLGLDNAGK	2xTMT6plex [N-Term; K11]	3.88595e-05	0	2	7	2	Q9NR31; Q9Y6B6	0	1604.98	High	Not Found	High	High	High	High	High	High	High	724.3		172.4	238.6	163.7	336.8	141.8	96.3	104.7	NotUnique	70.51	High	0	4.064e-05
FALSE	High	ITAAVIEHLER	1xTMT6plex [N-Term]	8.85323e-05	0	2	3	1	O43716; H0YIV9	0	1480.87	High	High	High	High	High	High	High	High	High	75.9	1.1	35.3	33.4	83.6	58.3	85.1	53.8	66.2	NotUnique	49.07	High	0	9.038e-05
FALSE	High	AQLEAHLGQVMESVR	1xTMT6plex [N-Term]	1.81998e-05	0	1	2	1	Q08379	0	1897.02	High	High	High	High	High	High	High	High	High	116.2	8.4	56.2	63.6	90	56.7	102.2	57.1	56	Unique	42.33	High	0	1.927e-05
FALSE	High	LILISTNGSFIR	1xTMT6plex [N-Term]; 1xDeamidated [N7]	3.78469e-05	0	1	1	1	Q6UXN9	0	1563.93	High	High	High	High	High	High	High	High	High	69	2.1	23.8	45.5	33.2	42.8	40.7	29.1	35.6	Unique	57.96	High	0	3.963e-05
FALSE	High	TFYGLHQDFPSVVLVGLGK	2xTMT6plex [N-Term; K19]	3.01985e-06	0	1	2	1	P28838	0	2535.44	High	Not Found	High	High	High	High	High	High	High	52.4		97.3	46.9	115.4	131.1	106.6	69	133.3	Unique	53.42	High	0	3.349e-06
FALSE	High	IKDLGQFYAGLSAESYPIIK	3xTMT6plex [N-Term; K2; K20]	7.06638e-07	0	1	1	1	Q7L775	1	2900.67	High	Not Found	High	High	High	High	High	High	High	15.9		11.3	9.2	11.8	12.2	11.1	6.9	5.9	Unique	72.15	High	0	8.119e-07
FALSE	High	HAMNLEAVNTYEGTHDIHALILGR	1xTMT6plex [N-Term]	3.15656e-06	0	1	1	1	Q92947	0	2904.5	High	High	High	High	High	High	High	High	High	15.5	1	13.9	15.6	23	16.4	18.2	15	16.3	Unique	40.25	High	0	3.5e-06
FALSE	High	KDGSCGVAYVVQEPGDYEVSVK	3xTMT6plex [N-Term; K1; K22]; 1xCarbamidomethyl [C5]	3.76353e-10	0	2	6	1	P21333-2; Q60FE5	1	3073.61	High	Not Found	High	High	High	High	High	High	High	206.3		114.1	54.1	83	153.5	58.5	38.5	64.2	NotUnique	100.64	High	0	5.229e-10
FALSE	High	QLMETTTEFTK	2xTMT6plex [N-Term; K11]	2.52319e-05	0	1	4	1	Q9GZT6	0	1786.97	High	Not Found	High	High	High	High	High	High	High	78.8		29.3	31.4	43.3	54.1	33	24.8	46.7	Unique	69.3	High	0	2.652e-05
FALSE	High	SPVDYGTSAGVWSQDK	2xTMT6plex [N-Term; K16]	1.32397e-05	0	1	1	1	Q9BYJ9	0	2155.11	High	Not Found	High	High	High	High	High	High	High	165.3		56	99	65.5	59	88.3	82.1	59.1	Unique	39.37	High	0	1.419e-05
FALSE	High	WAIAQLNYADMLK	2xTMT6plex [N-Term; K13]	1.38381e-05	0	1	1	3	Q14204	0	1995.11	High	Not Found	High	High	High	High	High	High	High	475.8		209	148.1	269.2	309.5	222.8	155.3	196.4	Unique	42.99	High	0	1.486e-05
FALSE	High	MTGSEFDFEEMKR	2xTMT6plex [N-Term; K12]	0.000140033	0	1	2	2	P50395	1	2065.01	High	High	High	High	High	High	High	High	High	192.4		179.6	87.7	116.5	226.1	98.9	92.7	82	Unique	37.28	High	0	0.0001422
FALSE	High	DGFRDFPAMVQELHQGGR	1xTMT6plex [N-Term]	7.78697e-06	0	1	1	1	P10253	1	2289.14	High	High	High	High	High	High	High	High	High	25.2	1.7	37.8	33	111.2	51.3	72.1	44	20.4	Unique	47.29	High	0	8.451e-06
FALSE	High	IKDMDLWEQQEEER	2xTMT6plex [N-Term; K2]	3.51043e-06	0	1	2	2	Q14152	1	2307.17	High	Not Found	High	High	High	High	High	High	High	158.8		101	61.6	101.2	91.6	118.7	77	67.8	Unique	56.28	High	0	3.88e-06
FALSE	High	QVADQMWQAGK	2xTMT6plex [N-Term; K11]	1.03355e-05	0	1	4	1	E7EQR8	0	1719.93	High	Not Found	High	High	High	High	High	High	High	123.9		49.6	48.9	78.2	59.3	107.5	62.3	68.7	Unique	63.87	High	0	1.114e-05
FALSE	High	NSTTDQVYQAIAAK	2xTMT6plex [N-Term; K14]	1.43521e-06	0	1	3	1	Q96L92	0	1968.08	High	Not Found	High	High	High	High	High	High	High	19.7		5	6.2	12.5	13.4	20.2	9.1	12.3	Unique	62.74	High	0	1.632e-06
FALSE	High	STDFAPIKEDFGQEK	3xTMT6plex [N-Term; K8; K15]	3.88595e-05	0	1	1	1	P46821	1	2399.31	High	Not Found	High	High	High	High	High	High	High	257		145.9	132.1	167.3	171.8	251.4	184.4	124.2	Unique	27.75	High	0	4.052e-05
FALSE	High	YAVWFGGSMLASTPEFYQVCHTK	2xTMT6plex [N-Term; K23]; 1xCarbamidomethyl [C20]	3.09954e-08	0	1	2	2	P61158	0	3137.56	High	Not Found	High	High	High	High	High	High	High	92.2		62.2	121.1	144	67.4	115.4	96.7	62.8	Unique	81	High	0	3.862e-08
FALSE	High	ALQPIVSEEEWAHTK	2xTMT6plex [N-Term; K15]	8.97244e-08	0	1	5	2	P43155	0	2196.21	High	High	High	High	High	High	High	High	High	237.7	2.7	165.8	132.7	207.1	239.7	138.9	88.8	146	Unique	53.16	High	0	1.088e-07
FALSE	High	SILDVSMGAQEPSRPLFSLIK	2xTMT6plex [N-Term; K21]	1.77465e-07	0	1	2	1	Q03169	0	2746.56	High	Not Found	High	High	High	High	High	High	High	50.3		67.1	36.8	41.5	77.1	55.5	39.8	62	Unique	53.25	High	0	2.123e-07
FALSE	High	QGWTTVGDLEGCVHYK	2xTMT6plex [N-Term; K16]; 1xCarbamidomethyl [C12]	2.02731e-06	0	3	16	1	O95819-5; O95819-3; O95819-6	0	2308.18	High	Not Found	High	High	High	High	High	High	High	108.8		45.5	32.2	41.2	41.8	45.8	32.2	42.5	NotUnique	29.23	High	0	2.285e-06
FALSE	High	KVAEPELMGTPDGTCYPPPPVPR	2xTMT6plex [N-Term; K1]; 1xCarbamidomethyl [C15]	4.00275e-11	0	1	3	1	P27708	1	2966.55	High	Not Found	High	High	High	High	High	High	High	82.8		51.1	43.9	30	65.5	30	26	36.5	Unique	104.09	High	0	5.93e-11
FALSE	High	QMCICADFEK	2xTMT6plex [N-Term; K10]; 2xCarbamidomethyl [C3; C5]	9.74173e-05	0	1	2	1	P14868	0	1759.86	High	Not Found	High	High	High	High	High	High	High	76.9		29.1	26.3	38.8	39.3	23.3	23	38.4	Unique	46.52	High	0	9.99e-05
FALSE	High	VMVLDFVTPTPLGTR	1xTMT6plex [N-Term]	8.70044e-05	0	1	17	2	Q16881	0	1875.06	High	High	High	High	High	High	High	High	High	144.3	13	210.2	61.3	78.8	233	100.1	74.8	129.1	Unique	34.36	High	0	8.945e-05
FALSE	High	THYIVGYNLPSYEYLYNLGDQYALK	2xTMT6plex [N-Term; K25]	6.57573e-10	0	1	2	4	P04843	0	3455.79	High	Not Found	High	High	High	High	High	High	High	164.6		39.3	53.6	165.2	84.1	160.4	94.7	57.7	Unique	102.37	High	0	9.056e-10
FALSE	High	NSVTPDMMEEMYKK	3xTMT6plex [N-Term; K13; K14]	3.81815e-05	0	1	1	2	P46777	1	2390.24	High	High	High	High	High	High	High	High	High	138.3	8.4	95.3	92.9	350.2	237.5	407.1	248.9	171.7	Unique	44.44	High	8.806e-05	0.0003964
FALSE	High	VQEYCYDNIHFMK	2xTMT6plex [N-Term; K13]; 1xCarbamidomethyl [C5]	1.09957e-05	0	1	4	1	Q9Y6E2	0	2205.09	High	High	High	High	High	High	High	High	High	129.5	1.8	58.5	88	79.7	67.8	73.5	61.5	71.4	Unique	25.32	High	0	1.183e-05
FALSE	High	KFDEGVASAPEVVDMQK	3xTMT6plex [N-Term; K1; K17]	8.35821e-06	0	1	3	1	Q9H1I8	1	2537.39	High	Not Found	High	High	High	High	High	High	High	139.3		74.1	60.2	71	90.5	77.5	51.1	53.2	Unique	47.68	High	0	9.091e-06
FALSE	High	STIVAIFPSPMLYAGPTEVQWHCR	1xTMT6plex [N-Term]; 1xCarbamidomethyl [C23]	1.32436e-08	0	1	2	1	O95340-2	0	2989.53	High	High	High	High	High	High	High	High	High	22	1.1	22.5	39.4	69.6	28.7	60.9	54.9	42.6	Unique	75.67	High	0	1.689e-08
FALSE	High	EGMQLISEKPETEAVVK	3xTMT6plex [N-Term; K9; K17]	1.18112e-06	0	2	4	1	Q01082; Q01082-3	0	2575.46	High	Not Found	High	High	High	High	High	High	High	246.4		116.6	95.6	93.2	120.3	82.6	52.2	85.8	NotUnique	34.15	High	0	1.343e-06
FALSE	High	ESSETPDQFMTADETR	1xTMT6plex [N-Term]; 1xOxidation [M10]	4.67408e-05	0	1	18	2	P16070	0	2088.92	High	High	High	High	High	High	High	High	High	99.2	2.4	30.9	51.5	68.6	41.9	62.7	30.9	20.8	Unique	75.56	High	0	4.836e-05
FALSE	High	KIDVMPIQILANEEMK	3xTMT6plex [N-Term; K1; K16]	7.19268e-07	0	1	2	1	Q8IZF2	1	2559.49	High	Not Found	High	High	High	High	High	High	High	196.5		13.2	57.5	89.9	8.2	84.9	58.9	6.2	Unique	64.7	High	0	8.296e-07
FALSE	High	DLNVISSLLK	2xTMT6plex [N-Term; K10]	0.000119924	0	1	6	1	Q5T5U3	0	1559.98	High	Not Found	High	High	High	High	High	High	High	45.4		28.7	31.1	26.6	30.8	38.8	31	27.5	Unique	40.23	High	0	0.0001216
FALSE	High	VSYFPTVPGVYIVSTK	2xTMT6plex [N-Term; K16]	5.57112e-05	0	2	11	4	H7C5L4; O75369-8	0	2215.28	High	Not Found	High	High	High	High	High	High	High	338.9		200.2	92.2	175.6	288.8	139.8	101.7	132.8	NotUnique	55.64	High	0.0001205	0.0004403
FALSE	High	VLVIGAGGLGCELLK	2xTMT6plex [N-Term; K15]; 1xCarbamidomethyl [C11]	1.33614e-08	0	1	3	1	Q8TBC4	0	1957.19	High	Not Found	High	High	High	High	High	High	High	20.7		13.2	7.2	2.6	21.7	6.4	1.7	7.5	Unique	74.85	High	0	1.699e-08
FALSE	High	LVLVTEQSLLICK	2xTMT6plex [N-Term; K13]; 1xCarbamidomethyl [C12]	5.97582e-05	0	1	1	1	Q5T0D9	0	1974.21	High	Not Found	High	High	High	High	High	High	High	104.5		77.5	57	56.6	78.9	48.7	33.4	74.5	Unique	32.72	High	0	6.174e-05
FALSE	High	ACEPIIQNFCHDVADNQIDSGDLMECLIQNK	3xTMT6plex [N-Term; S20; K31]; 3xCarbamidomethyl [C2; C10; C26]	9.40899e-05	0	1	3	1	Q92896-2	0	4335.11	High	Not Found	Not Found	Not Found	High	Not Found	High	High	Not Found	8.1				3.4		1.5	1.9		Unique	28.96	High	0	9.613e-05
FALSE	High	ACEPIIQNFCHDVADNQIDSGDLMECLIQNK	2xTMT6plex [N-Term; K31]; 3xCarbamidomethyl [C2; C10; C26]	6.52496e-07	0	1	3	1	Q92896-2	0	4105.95	High	Not Found	High	High	High	High	High	High	High	157.5		17	53.3	70.3	12.2	57	37.5	16.8	Unique	61.89	High	0	7.556e-07
FALSE	High	LVVVDFSATWCGPCK	2xTMT6plex [N-Term; K15]; 2xCarbamidomethyl [C11; C14]	4.79891e-05	0	1	2	1	P10599	0	2197.15	High	Not Found	High	High	High	High	High	High	High	196.4		116.1	61.9	55.6	127.6	44.4	36.5	63.9	Unique	22.86	High	0	4.991e-05
FALSE	High	KYGEFFPVPESILTSMK	3xTMT6plex [N-Term; K1; K17]	6.81433e-05	0	1	1	1	Q9UGM6	1	2660.5	High	Not Found	High	High	High	High	High	High	High	40.4		24	18.3	29.7	31.2	27	15.4	24.3	Unique	49.32	High	0	7.041e-05
FALSE	High	KIAELEEEQSQGSTTNSDWMK	3xTMT6plex [N-Term; K1; K21]	2.41597e-11	0	1	3	1	P46821	1	3098.59	High	Not Found	High	High	High	High	High	High	High	171.6		157.4	125.4	137.8	152.6	214.3	149.5	107.6	Unique	133.51	High	0	3.597e-11
FALSE	High	NPVLQQVLEGR	1xTMT6plex [N-Term]	8.85323e-05	0	1	2	1	O60443	0	1481.86	High	Not Found	High	High	High	High	High	High	High	42.1		15.7	12.7	20.3	42.8	19.6	9	17.4	Unique	57.57	High	0	9.075e-05
FALSE	High	TPAIPTAVNLADSR	1xTMT6plex [N-Term]	4.97048e-05	0	1	1	1	Q9UQ35	0	1654.93	High	High	High	High	High	High	High	High	High	82.5	2.3	28.7	65	47.9	79.3	55.6	40.1	42.6	Unique	39.43	High	0	5.171e-05
FALSE	High	ELPLYCSGGLR	1xTMT6plex [N-Term]; 1xCarbamidomethyl [C6]	0.000131854	0	1	1	1	Q14457	0	1493.8	High	Not Found	High	High	High	High	High	High	High	24.8		14.1	12.4	14.5	17.7	16.8	5	9.1	Unique	53.01	High	0	0.0001339
FALSE	High	ATISPWPGTTLNLLK	2xTMT6plex [N-Term; K15]	0.000100859	0	1	1	1	Q8NC60	0	2070.24	High	Not Found	High	High	High	High	High	High	High	122.6		66.2	93.9	165	98.7	153.7	111	101.1	Unique	31.71	High	0	0.0001031
FALSE	High	AMQDAEVSKSDIGEVILVGGMTR	2xTMT6plex [N-Term; K9]	1.82291e-06	0	1	2	1	P38646	1	2864.53	High	High	High	High	High	High	High	High	High	39.4	2.1	88.1	51.7	274.7	151.6	251.1	126.8	78.7	Unique	39.02	High	0	2.051e-06
FALSE	High	VLLLIDDEYKVTAFPATR	2xTMT6plex [N-Term; K10]	6.1318e-06	0	1	4	1	Q8N766	1	2522.46	High	Not Found	High	High	High	High	High	High	High	46.9		65.7	78.6	233.8	100	300.8	113.6	63.2	Unique	40.71	High	0	6.711e-06
FALSE	High	SAGTVELDDQIQANLPDEQVLSEEEIDENFK	2xTMT6plex [N-Term; K31]	0.00012307	0	1	1	1	P07384	0	3933.95	High	Not Found	High	High	High	High	High	High	High	41.7		24.2	13.1	18.6	32.2	20.6	9.3	12.1	Unique	45.94	High	0	0.0001253
FALSE	High	QTGQWIGMVENFNQALK	2xTMT6plex [N-Term; K17]	2.48478e-07	0	1	8	1	P78537	0	2422.3	High	Not Found	High	High	High	High	High	High	High	119.6		57.9	34.1	77.9	97.4	61.8	53.3	42.5	Unique	58.34	High	0	2.948e-07
FALSE	High	NTALETLHQNSITQVSIYEVDKQDCR	3xTMT6plex [N-Term; S11; K22]; 1xCarbamidomethyl [C25]	5.91849e-06	0	1	2	1	Q92747	1	3749.97	High	High	High	High	High	High	High	High	High	112.5	2	64.3	48.6	142.8	137	145.6	126.7	96	Unique	20.72	High	0	6.461e-06
FALSE	High	EKPLLIFEILQR	2xTMT6plex [N-Term; K2]	1.51172e-05	0	1	3	1	Q9H6T3	0	1957.23	High	Not Found	High	High	High	High	High	High	High	128.2		65.5	52.8	55.1	72.7	56.4	40	47.5	Unique	43.56	High	0	1.613e-05
FALSE	High	QMLVNAFTEQILPHFSTEGPQR	2xTMT6plex [N-Term; T/S]	1.69823e-06	0	1	1	2	Q53FA7	0	3001.6	High	Not Found	High	High	High	High	High	High	High	33		104	124.5	65.3	97.3	90.1	117.1	149.9	Unique	51.17	High	0	2.193e-06
FALSE	High	QMLVNAFTEQILPHFSTEGPQR	1xTMT6plex [N-Term]	4.82827e-07	0	1	1	2	Q53FA7	0	2772.43	High	High	High	High	High	High	High	High	High	34.2	6.9	43.7	49.8	34.3	31.3	32.6	23.7	39.1	Unique	69.89	High	0	5.626e-07
FALSE	High	NAFACFDEEATGTIQEDYLR	1xTMT6plex [N-Term]; 1xDeamidated [Q/N]; 1xCarbamidomethyl [C5]	1.04339e-06	0	1	3	3	J3QRS3	0	2580.18	High	High	High	High	High	High	High	High	High	61.8	2.9	49.7	46.8	37.8	49.7	35.2	27.1	35.2	Unique	66.75	High	0	1.193e-06
FALSE	High	NAFACFDEEATGTIQEDYLR	1xTMT6plex [N-Term]; 1xCarbamidomethyl [C5]	4.53637e-08	0	1	3	29	J3QRS3	0	2579.19	High	High	High	High	High	High	High	High	High	465	2.9	192.6	151.8	277.9	396.5	277.6	178.3	264.7	Unique	80.7	High	0.002316	0.02082
FALSE	High	IDVSIEAASGGK	2xTMT6plex [N-Term; K12]	1.27796e-05	0	1	4	1	P09622	0	1604.93	High	Not Found	High	High	High	High	High	High	High	143.8		60.3	65.7	87.9	102.4	73.8	47.2	97.5	Unique	76.03	High	0	1.37e-05
FALSE	High	GLETFSQLVWK	2xTMT6plex [N-Term; K11]	4.84124e-05	0	1	5	1	H3BP20	0	1766.03	High	Not Found	High	High	High	High	High	High	High	54.7		23.5	45.4	85.5	43.7	55.1	46.5	25.2	Unique	44.62	High	0	5.026e-05
FALSE	High	ASLPVIATVFDK	2xTMT6plex [N-Term; K12]	8.70044e-05	0	1	3	1	Q96DM3	0	1719.05	High	Not Found	High	High	High	High	High	High	High	33.4		15.7	15.4	16.7	20.8	18.7	12.2	15.1	Unique	24.05	High	0	8.911e-05
FALSE	High	NNAYLAQSPQLYK	2xTMT6plex [N-Term; K13]	3.06347e-05	0	1	2	1	P14868	0	1968.1	High	Not Found	High	High	High	High	High	High	High	362.5		121	55.2	152.7	222	141.2	112.8	177.2	Unique	43.71	High	0	3.221e-05
FALSE	High	APGGLSYPAASPTPHAAFLADPVSNMAMAYGSSLAAQGK	2xTMT6plex [N-Term; K39]	2.09625e-05	0	1	10	1	Q5BJH7	0	4233.15	Not Found	Not Found	High	High	High	High	High	High	High			1.7	6.9	7.6	3	5.9	3.4	3.4	Unique	65.69	High	0	2.222e-05
FALSE	High	QILSLNYDDSTAAGR	1xTMT6plex [N-Term]	6.87954e-06	0	1	2	1	Q12768	0	1852.96	High	High	High	High	High	High	High	High	High	34.1	1.2	25.4	21.9	19	29	20.6	10.4	18.3	Unique	55.3	High	0	7.469e-06
FALSE	High	SPFVVQVGEACNPNACR	1xTMT6plex [N-Term]; 1xDeamidated [N14]; 2xCarbamidomethyl [C11; C16]	2.47905e-05	0	1	10	1	O75369-8	0	2135.02	High	Not Found	High	High	High	High	High	High	High	45.1		29.7	13.5	16.2	44.4	20.1	11.2	15.3	Unique	35.79	High	0	2.622e-05
FALSE	High	MAGLQALEDIIKK	3xTMT6plex [N-Term; K12; K13]	4.61915e-06	0	1	2	1	Q9P2D3	1	2117.3	High	Not Found	High	High	High	High	High	High	High	36.3		19.8	19	38.7	30.5	34.9	27.2	16.6	Unique	37.44	High	0	5.097e-06
FALSE	High	DLAAMDKDSFSDPYAIVSFLHQSQK	5xTMT6plex [N-Term; K7; S18; S23; K25]	6.46586e-05	0	1	15	1	O75923-8	1	3959.16	High	Not Found	High	High	High	High	High	High	High	65.7		34.5	46.3	160.4	132.8	133.1	96.8	84.1	Unique	16.6	High	0	6.677e-05
FALSE	High	DLAAMDKDSFSDPYAIVSFLHQSQK	3xTMT6plex [N-Term; K7; K25]	1.98807e-05	0	1	15	1	O75923-8	1	3500.83	High	Not Found	High	High	High	High	High	High	High	22.3		30.7	31.4	38.6	38.9	44.5	30.2	22.7	Unique	39.18	High	0	2.115e-05
FALSE	High	ARLEIEPEWAYGK	2xTMT6plex [N-Term; K13]	9.97617e-06	0	1	1	1	Q00688	1	2020.13	High	High	High	High	High	High	High	High	High	20.3	5	125.1	98.6	289.5	193.4	328	203.4	138.8	Unique	43.38	High	0	1.079e-05
FALSE	High	ELQELQDSLNAER	1xTMT6plex [N-Term]	3.80129e-07	0	1	1	1	P12270	0	1773.92	High	Not Found	High	High	High	High	High	High	High	11.1		1	8.5	6.4	7.6	6.1	2.4	6.4	Unique	88.36	High	0	4.433e-07
FALSE	High	IILQDEDVTTK	2xTMT6plex [N-Term; K11]	0.000101738	0	2	2	1	P51805; Q9UIW2	0	1733.01	High	Not Found	High	High	High	High	High	High	High	28.2		6.5	11.2	14.5	13.1	17.6	5.7	6.4	NotUnique	50.25	High	0	0.0001036
FALSE	High	KPLLPYTPGSDVAGVIEAVGDNASAFKK	4xTMT6plex [N-Term; K1; K27; K28]	2.54881e-10	0	1	4	1	Q08257	1	3761.17	High	Not Found	High	High	High	High	High	High	High	3		11.8	11.1	24.8	21.5	24.5	18.8	17	Unique	88.6	High	0	3.576e-10
FALSE	High	LNVAAELVQGTVPLEVPQVKPK	3xTMT6plex [N-Term; K20; K22]	8.97542e-07	0	1	1	1	Q9NQS1	0	3016.84	High	Not Found	High	High	High	High	High	High	High	180.7		165.3	107.7	210.2	203.1	178	118.4	94.6	Unique	29.69	High	0	1.03e-06
FALSE	High	ISLPLPNFSSLNLRETNLDSLPLVDTHSKR	2xTMT6plex [N-Term; K29]	8.93062e-05	0	1	1	1	P08670	2	3835.15	High	Not Found	High	High	High	High	High	High	High	47.6		60.2	56.3	124.4	121.6	98.5	45.7	37.2	Unique	40.7	High	0	9.181e-05
FALSE	High	IGEWSGPNQPNSSTGAWDNQK	2xTMT6plex [N-Term; K21]	1.37304e-06	0	1	3	1	Q9UPQ9	0	2731.35	High	Not Found	High	High	High	High	High	High	High	38.3		18.3	21.5	28.1	26.5	30.9	18.6	19.6	Unique	63.68	High	0	1.555e-06
FALSE	High	RPSAALALQEQWLQAGNGR	1xTMT6plex [N-Term]; 1xDeamidated [N17]	4.30313e-07	0	1	4	1	O75962	0	2296.24	High	High	High	High	High	High	High	High	High	10.2	1.3	12	7	9.5	15.7	9.2	8.6	5.9	Unique	59.54	High	0	5.039e-07
FALSE	High	LFELDPLTGEWHYK	2xTMT6plex [N-Term; K14]	1.53868e-05	0	1	3	1	Q9BZF1	0	2206.19	High	Not Found	High	High	High	High	High	High	High	275.2		156.2	158.9	174.3	178.6	175.9	111.6	143.7	Unique	44.33	High	0	1.64e-05
FALSE	High	LQALANEQAAAAHELEK	2xTMT6plex [N-Term; K17]	2.1178e-08	0	1	4	1	Q86UP2	0	2265.26	High	Not Found	High	High	High	High	High	High	High	158.6		92.5	84.2	116.4	124.4	146.6	86.9	129	Unique	54.29	High	0	2.664e-08
FALSE	High	TVVNISSLCALQPFK	2xTMT6plex [N-Term; K15]; 1xCarbamidomethyl [C9]	3.52728e-05	0	1	1	1	P35270	0	2135.23	High	Not Found	High	High	High	High	High	High	High	381.1		225.1	136.1	183.8	358.5	162.7	125.1	209.9	Unique	50.2	High	0	3.701e-05
FALSE	High	IGLNMGPVVAGVIGAR	1xTMT6plex [N-Term]	9.91238e-05	0	1	2	1	O43306	0	1753.04	High	High	High	High	High	High	High	High	High	12.5	1.8	12.1	7.1	12.8	12.9	10.9	3.3	6.8	Unique	44.75	High	0	0.000101
FALSE	High	WTAPEAALYGR	1xTMT6plex [N-Term]	0.000109043	0	4	7	1	J3QRU1; P06241-2; P12931-2; P06241	0	1463.78	High	High	High	High	High	High	High	High	High	110.9	3	74.1	67.9	76.7	83.4	83.7	58.7	57.7	NotUnique	60.09	High	0	0.0001108
FALSE	High	ICGDIHGQYYDLLR	1xTMT6plex [N-Term]; 1xCarbamidomethyl [C2]	3.06347e-05	0	2	11	1	P62136; P36873-2	0	1951.99	High	High	High	High	High	High	High	High	High	395.4	13.2	243.8	214.6	221	281.1	220.4	147.6	190.1	NotUnique	42.62	High	0	3.22e-05
FALSE	High	AEGPEVDVNLPK	2xTMT6plex [N-Term; K12]	1.34894e-06	0	1	1	2	Q09666	0	1725.98	High	Not Found	High	High	High	High	High	High	High	544.2		348.2	297.8	332.2	429.4	352.5	231.4	298.9	Unique	78.66	High	0	1.532e-06
FALSE	High	FATVEVTDKPVDEALR	2xTMT6plex [N-Term; K9]	2.63699e-05	0	1	2	1	Q9NRV9	0	2248.26	High	Not Found	High	High	High	High	High	High	High	153.5		122.4	64.2	98.5	162.2	99.1	69.9	113.6	Unique	40	High	0	2.781e-05
FALSE	High	ELPVLWHQCLLTLVQR	1xTMT6plex [N-Term]; 1xCarbamidomethyl [C9]	3.31635e-05	0	1	1	1	Q13895	0	2234.27	High	Not Found	High	High	High	High	High	High	High	20.2		20.4	23.3	39.7	27.3	37.2	24.7	13.6	Unique	29.7	High	0	3.464e-05
FALSE	High	IVDLPDHIEVNSGK	2xTMT6plex [N-Term; K14]	3.75152e-05	0	2	5	1	Q02763-3; Q02763	0	1994.13	High	High	High	High	High	High	High	High	High	376.7	3.9	160.6	165.3	210.7	93.6	193.3	116.8	52.1	NotUnique	34.47	High	0	3.901e-05
FALSE	High	EQLMREEAEQK	2xTMT6plex [N-Term; K11]	3.34569e-05	0	1	4	1	Q14444	1	1848.99	High	Not Found	High	High	High	High	High	High	High	20.3		46.5	43.8	102.3	59.6	132.3	74.6	37.6	Unique	40.48	High	0	3.488e-05
FALSE	High	TIDLSNNKIESLPPLLIGK	3xTMT6plex [N-Term; K8; K19]	4.20615e-05	0	1	2	1	Q8N9N7	1	2752.68	High	Not Found	High	High	High	High	High	High	High	2.3		13.1	3.1	21.7	19.5	27.2	19.8	10.4	Unique	32.37	High	0	4.369e-05
FALSE	High	ATFYGEQVDYYK	2xTMT6plex [N-Term; K12]	1.86886e-05	0	1	2	2	P46940	0	1942	High	Not Found	High	High	High	High	High	High	High	97.1		97.7	63.7	69.6	91.5	87.9	62.1	61.9	Unique	41.49	High	0	1.985e-05
FALSE	High	TENPVIMGLSSQNGQLR	1xTMT6plex [N-Term]; 1xDeamidated [N/Q]	5.22705e-08	0	1	2	2	P26196	0	2074.08	High	High	High	High	High	High	High	High	High	109.8	2.1	51.1	48.8	81.9	76.5	84.5	66.4	55.1	Unique	85.08	High	0	6.462e-08
FALSE	High	DNGKHALIIYDDLSK	3xTMT6plex [N-Term; K4; K15]; 1xDeamidated [N2]	2.66035e-05	0	1	3	1	P25705	1	2390.35	High	Not Found	High	High	High	High	High	High	High	160.4		70.9	83.6	323.3	167.5	295	84.3	118.7	Unique	23.21	High	0	2.808e-05
FALSE	High	GPPQPLPAVQPSGPINMEETRPEGSYFSK	2xTMT6plex [N-Term; K29]	5.23929e-05	0	1	6	1	Q9Y2D5-6	0	3568.85	High	High	High	High	High	High	High	High	High	150	5.8	115.5	76.1	109.3	122.2	92.5	63.6	64.6	Unique	55.6	High	0	5.423e-05
FALSE	High	FHDFLGDSWGILFSHPR	1xTMT6plex [N-Term]	4.66023e-06	0	1	1	1	P30041	0	2260.15	High	Not Found	High	Not Found	High	High	High	High	High	2		12.6		1.5	8.6	3.1	1.3	2	Unique	45.38	High	0	5.101e-06
FALSE	High	SPFVVQVGEACNPNACR	1xTMT6plex [N-Term]; 2xCarbamidomethyl [C11; C16]	8.58661e-07	0	1	10	1	O75369-8	0	2134.04	High	High	High	High	High	High	High	High	High	117.4	3.9	82.7	50.5	58	113.2	43.1	29.6	47.8	Unique	59.36	High	0	9.826e-07
FALSE	High	SVASSQPAKPTK	3xTMT6plex [N-Term; K9; K12]	6.24336e-05	0	2	6	1	G3V1L9; G5E9E7	0	1888.15	High	Not Found	High	High	High	High	High	High	High	292.8		212.1	141.6	191.6	271	292.7	165.6	154.9	NotUnique	29.58	High	0	6.416e-05
FALSE	High	ILKEDILNYLEK	3xTMT6plex [N-Term; K3; K12]	7.76839e-05	0	1	2	1	P11182	1	2178.34	High	Not Found	High	High	High	High	High	High	High	219.5		181	140.9	236.7	265.3	208.4	135.2	181.7	Unique	32.79	High	0	7.952e-05
FALSE	High	LAPANGMPTGENVISVAELINAMK	2xTMT6plex [N-Term; K24]; 1xDeamidated [N5]	4.3033e-06	0	1	1	1	O95202	0	2899.57	High	Not Found	High	High	High	High	High	High	High	15.4		6.8	5.9	13.9	11.6	12.3	5.4	8	Unique	74.17	High	0	4.742e-06
FALSE	High	TALYDLLGVPSTATQAQIK	2xTMT6plex [N-Term; K19]	4.70167e-06	0	1	1	1	Q96LL9	0	2448.41	High	Not Found	High	High	High	High	High	High	High	95.7		29.4	32.5	64.5	64.3	77.1	45.4	53.8	Unique	38.45	High	0	5.179e-06
FALSE	High	ICGLDPTSTLGIYFEVVNQHNTPIPQGGR	2xTMT6plex [N-Term; T22]; 1xCarbamidomethyl [C2]	2.21452e-07	0	1	1	1	Q15437	0	3641.92	High	Not Found	High	High	High	High	High	High	High	138.9		29	45.3	78.3	60	92.3	56	43	Unique	61.72	High	0	2.635e-07
FALSE	High	TVHYLPILFIDQLSNR	1xTMT6plex [N-Term]	1.99048e-08	0	2	3	1	G5E9Z2; Q96KA5	0	2158.22	High	High	High	High	High	High	High	High	High	150.3	6.5	43.8	66	103.3	53.9	96.2	55.8	37.9	NotUnique	83.6	High	0	2.502e-08
FALSE	High	LFLAGYELTPTMR	1xTMT6plex [N-Term]	5.46527e-06	0	1	1	1	Q4G0F5	0	1740.96	High	High	High	High	High	High	High	High	High	77.9	3	49.3	37.6	49	56.1	51.5	29	29.4	Unique	60.9	High	0	5.991e-06
FALSE	High	SVEESAGLVGLK	2xTMT6plex [N-Term; K12]	1.88865e-06	0	1	1	1	Q96HJ9	0	1646.97	High	Not Found	High	High	High	High	High	High	High	71.5		46.3	34.1	59.8	72.6	50.9	27.3	42.1	Unique	79.06	High	0	2.116e-06
FALSE	High	AMLTAVDWTLTK	2xTMT6plex [N-Term; K12]	1.66607e-05	0	1	2	1	Q9HD20	0	1808.04	High	Not Found	High	High	High	High	High	High	High	152		78.1	65.1	64.5	76.5	61.3	42	75.8	Unique	51.58	High	0	1.781e-05
FALSE	High	SNSSSEAVLGQEELSAQAK	2xTMT6plex [N-Term; K19]	2.82978e-05	0	1	2	1	A0A1B0GTL5	0	2393.26	High	Not Found	High	High	High	High	High	High	High	27.9		11.1	7.3	17	19.6	18.6	9.2	17.3	Unique	52.57	High	0	2.983e-05
FALSE	High	IFYVNYLSELSEHVK	3xTMT6plex [N-Term; S11; K15]	1.28931e-05	0	1	2	1	Q07960	0	2528.44	High	Not Found	High	High	High	High	High	High	High	476.7		132.6	136.4	89.7	224.3	124.8	84.6	136.4	Unique	35.56	High	0	1.382e-05
FALSE	High	IFYVNYLSELSEHVK	2xTMT6plex [N-Term; K15]	8.43585e-07	0	1	2	1	Q07960	0	2299.27	High	Not Found	High	High	High	High	High	High	High	32.9		31.5	32.1	6.6	9.5	9.4	2.2	6.3	Unique	63.79	High	0	9.702e-07
FALSE	High	YMGCVEVLQSMR	1xTMT6plex [N-Term]; 1xCarbamidomethyl [C4]	5.05854e-05	0	1	8	1	P29353-6	0	1701.83	High	Not Found	High	High	High	High	High	High	High	26.8		20.7	16.5	51.7	38	47.5	23.5	19.9	Unique	54.5	High	0	5.256e-05
FALSE	High	KLTWFVNEGLVDGWDDPRFPTVR	2xTMT6plex [N-Term; K1]	6.46742e-07	0	1	2	1	P07814	2	3205.72	High	Not Found	High	High	High	High	High	High	High	8.1		17.2	14.5	31.1	25	26.4	15.5	15.7	Unique	65.06	High	0	7.449e-07
FALSE	High	IVNTPFQVLMNSEK	2xTMT6plex [N-Term; K14]	1.43363e-05	0	1	2	2	Q92544	0	2078.17	High	High	High	High	High	High	High	High	High	319.9	0.9	46.7	160.5	300.5	96.6	318.4	169.3	89.4	Unique	49.92	High	0	1.527e-05
FALSE	High	LQEEIVNSVK	2xTMT6plex [N-Term; K10]	4.2433e-05	0	1	4	1	O75027-2	0	1616.96	High	Not Found	High	High	High	High	High	High	High	194.9		71.3	96.1	119.1	131.4	124.2	76.3	99.3	Unique	59.77	High	0	4.416e-05
FALSE	High	EDLMGLAIGTHGANIQQAR	1xTMT6plex [N-Term]	2.17564e-07	0	3	19	1	Q06787; Q06787-7; P51116	0	2224.17	High	High	High	High	High	High	High	High	High	100.1	1.6	52.7	58.7	69.3	74.9	78.1	53.8	69.2	NotUnique	58.03	High	0	2.584e-07
FALSE	High	GLLLSCIEDKNPCIFFEPK	3xTMT6plex [N-Term; K10; K19]; 2xCarbamidomethyl [C6; C13]	1.72601e-05	0	1	1	1	P21953	1	2967.63	High	Not Found	High	High	High	High	High	High	High	25.2		14.1	21	45.8	28.7	24.9	17.3	20.4	Unique	36.24	High	0	1.842e-05
FALSE	High	TVTLGGDVFDPHGTLSGGAR	1xTMT6plex [N-Term]	3.57315e-06	0	1	2	2	O95347	0	2186.14	High	High	High	High	High	High	High	High	High	66	5.6	38.5	48.1	33.9	33.3	76.9	46.7	32.3	Unique	41.13	High	0	3.945e-06
FALSE	High	TVTLGGDVFDPHGTLSGGAR	2xTMT6plex [N-Term; S16]	6.29827e-05	0	1	2	1	O95347	0	2415.3	High	Not Found	High	High	High	High	High	High	High	86.3		28.2	41.4	61.5	55.8	114.4	76.9	63	Unique	30.71	High	0	6.493e-05
FALSE	High	VENFFTLYNVK	2xTMT6plex [N-Term; K11]	0.000114854	0	1	1	1	P48553	0	1832.04	High	Not Found	High	High	High	High	High	High	High	10.6		6.4	2.1	7.4	9.3	9.1	7.7	2.5	Unique	39.84	High	0	0.0001166
FALSE	High	VKIPEGTILTMDMLTVK	3xTMT6plex [N-Term; K2; K17]	3.35797e-07	0	1	1	1	Q9NR45	1	2576.54	High	Not Found	High	High	High	High	High	High	High	113		169.2	80.1	98.4	302.5	103.7	95.9	119.3	Unique	74.87	High	0	3.937e-07
FALSE	High	TINLYPLTNYTFGTK	2xTMT6plex [N-Term; K15]	1.56612e-05	0	1	1	2	O43809	0	2204.24	High	High	High	High	High	High	High	High	High	120.8	0.8	43.2	120.1	130.5	133.7	169.3	121.4	84.7	Unique	71.88	High	0	1.675e-05
FALSE	High	KQIVAGVNYFLDVELGR	2xTMT6plex [N-Term; K1]	1.71287e-07	0	1	1	1	P01034	1	2379.38	High	Not Found	Not Found	High	High	High	High	High	High	25.4			8.8	39.7	0.4	29.7	10.3	1.9	Unique	65.88	High	0	2.038e-07
FALSE	High	LCTQLEGLQSTVTGHVER	1xTMT6plex [N-Term]; 1xCarbamidomethyl [C2]	9.80121e-06	0	1	2	1	Q6P2E9	0	2257.18	High	High	High	High	High	High	High	High	High	49.9	14.1	69.3	39.2	29	21	30	21.6	21.5	Unique	44.58	High	0	1.059e-05
FALSE	High	VLPVGDEVVGIVGYTSK	2xTMT6plex [N-Term; K17]	5.47425e-05	0	1	3	3	P21589	0	2190.28	High	Not Found	High	High	High	High	High	High	High	401.9		209.2	175.8	305.9	188.5	356.4	210.1	112.8	Unique	39.09	High	0	5.684e-05
FALSE	High	EMVATQQEMMDAQLR	1xTMT6plex [N-Term]	5.51387e-06	0	1	1	1	P17568	0	2009.97	High	Not Found	High	High	High	High	High	High	High	75.1		26	24	47.6	53.2	43	27.9	34.3	Unique	46.46	High	0	6.021e-06
FALSE	High	NLSTFAVDGK	2xTMT6plex [N-Term; K10]	3.1734e-05	0	1	8	2	A0A096LPI6	0	1509.87	High	Not Found	High	High	High	High	High	High	High	282.4		108.5	107.1	334.5	311.9	247.2	175	281	Unique	75.2	High	0	3.317e-05
FALSE	High	TNADVMTALSQGYR	1xTMT6plex [N-Term]	9.13582e-07	0	2	2	1	P07948; P07948-2	0	1755.89	High	Not Found	High	High	High	High	High	High	High	42.8		21.2	19.7	31.2	45.7	36.3	20.9	32.9	NotUnique	84.14	High	0	1.043e-06
FALSE	High	NSVEEWTTEDWTEDLSETK	2xTMT6plex [N-Term; K19]	3.86954e-06	0	1	3	2	Q5T6F2	0	2757.31	High	Not Found	High	High	High	High	High	High	High	120.2		22.1	38.8	79.2	52.9	109.7	72.6	59.9	Unique	72.63	High	0	2.355e-05
FALSE	High	TEAVASSLYDILAR	1xTMT6plex [N-Term]	4.78398e-08	0	1	5	1	P16278	0	1737.96	High	High	High	High	High	High	High	High	High	84.9	2.7	17.7	33.6	77	46.7	59.4	49.7	16.1	Unique	88.3	High	0	5.903e-08
FALSE	High	LQVLVGDVLK	2xTMT6plex [N-Term; K10]	3.8519e-05	0	1	3	1	Q9UNQ2	0	1542	High	High	High	High	High	High	High	High	High	138.8	0.9	11.6	92.6	67.2	35.7	90.3	67.8	45.4	Unique	73.42	High	0	4.004e-05
FALSE	High	AENSSLNLIGK	2xTMT6plex [N-Term; K11]	5.66226e-06	0	1	3	2	P46459	0	1603.94	High	Not Found	High	High	High	High	High	High	High	276.9		168.7	140.4	170.2	183.3	183.9	98.6	117.6	Unique	83	High	0	8.585e-06
FALSE	High	SVLTGGLDALEFIGKK	3xTMT6plex [N-Term; K15; K16]	1.93828e-08	0	1	2	1	Q8IWE2	1	2335.42	High	Not Found	High	High	High	High	High	High	High	27.3		46.7	21.7	60.7	93.3	71	38.2	32.8	Unique	44.74	High	0	2.443e-08
FALSE	High	IDHLSFGELVPAIINPLDGTEK	2xTMT6plex [N-Term; K22]	1.00636e-08	0	1	5	2	A0A087WU02	0	2836.59	High	Not Found	High	High	High	High	High	High	High	83.3		38.7	47.6	58.6	30.3	56.8	35.7	21.8	Unique	70.51	High	0	1.29e-08
FALSE	High	ELQELSSSIK	2xTMT6plex [N-Term; K10]	6.08145e-05	0	1	2	1	O94874	0	1591.93	High	Not Found	High	High	High	High	High	High	High	159		66.3	80.8	85.6	85	94.5	59.6	74.5	Unique	62.8	High	0	6.275e-05
FALSE	High	LQGQQLPVVLPPIMK	2xTMT6plex [N-Term; K15]	0.000141241	0	2	7	1	Q9NZM3; Q9NZM3-4	0	2119.31	High	Not Found	High	High	High	High	High	High	High	533.2		84.4	131.4	55	116.6	76.6	74.3	119	NotUnique	37.88	High	0	0.0001433
FALSE	High	YGLFYNTPLISGCQNTGLFR	1xTMT6plex [N-Term]; 1xCarbamidomethyl [C13]	2.57491e-06	0	1	1	1	Q5NDL2	0	2550.3	High	High	High	High	High	High	High	High	High	91.7	1.4	27.4	51.3	87.8	37.3	59.2	39.8	26	Unique	62.71	High	0	2.883e-06
FALSE	High	GDILLDENCCVESLPDKDGKK	4xTMT6plex [N-Term; K17; K20; K21]; 2xCarbamidomethyl [C9; C10]	1.41002e-06	0	1	3	1	Q9UH65	2	3321.78	High	Not Found	High	High	High	High	High	High	High	34.6		88.8	27.8	88.7	129.8	95.1	72.9	42.3	Unique	42.6	High	0	1.602e-06
FALSE	High	VGMLALEMLGR	1xTMT6plex [N-Term]	9.62931e-06	0	1	11	1	A7E2V4-4	0	1418.81	High	Not Found	High	High	High	High	High	High	High	11.4		7.3	2.3	5.4	9.1	5.9	1.6	6.6	Unique	75.62	High	0	1.035e-05
FALSE	High	SLQDDSKNENLLDLNQK	3xTMT6plex [N-Term; K7; K17]	4.06073e-05	0	1	4	1	Q14667	1	2661.47	High	Not Found	High	High	High	High	High	High	High	46.1		27.6	32.1	49.1	47	45.2	28	26.6	Unique	32.76	High	0	4.237e-05
FALSE	High	LGIWGGNVALDNLQIK	2xTMT6plex [N-Term; K16]	3.58995e-05	0	1	4	1	Q709C8	0	2169.28	High	Not Found	High	High	High	High	High	High	High	133.5		43.3	37.3	45.2	69.9	42.4	29.1	38.7	Unique	45.11	High	0	3.738e-05
FALSE	High	TQAPPSVILGVTNPFFAK	2xTMT6plex [N-Term; K18]	4.61915e-06	0	1	2	1	Q8IWF6	0	2345.36	High	Not Found	High	High	High	High	High	High	High	30.7		19.7	16.1	45.4	34.7	35.7	24.6	26.5	Unique	58.04	High	0	5.067e-06
FALSE	High	TLGTMIAGDTSGDYR	1xTMT6plex [N-Term]	3.28726e-05	0	1	2	1	P20073	0	1786.88	High	Not Found	High	High	High	High	High	High	High	323.4		97.3	44.4	103.8	80.2	132.6	13.2	48.1	Unique	53.37	High	0	3.435e-05
FALSE	High	GSFMGSDEVFTYFYK	2xTMT6plex [N-Term; K15]	9.91238e-05	0	1	1	4	P50281	0	2236.1	High	High	High	High	High	High	High	High	High	1008.3	12.5	97.5	352.4	1009.6	113.2	837.1	311.7	70.8	Unique	28.22	High	0	0.0001016
FALSE	High	LQEVGQVSVSLQR	1xTMT6plex [N-Term]	3.26992e-07	0	1	3	1	P06756	0	1671.96	High	High	High	High	High	High	High	High	High	163.6	7.1	41.5	42.4	77.4	32	73.2	32.7	13.9	Unique	86.07	High	0	3.857e-07
FALSE	High	TLLYDGLVYWK	2xTMT6plex [N-Term; K11]	3.95495e-05	0	1	6	1	Q8N1W1-6	0	1829.06	High	Not Found	High	High	High	High	High	High	High	29.1		20.6	18.1	15.2	26	16.4	13.4	20	Unique	58.72	High	0	4.134e-05
FALSE	High	DALVSGALESTK	2xTMT6plex [N-Term; K12]	8.13925e-06	0	1	2	1	P11274	0	1648.95	High	Not Found	High	High	High	High	High	High	High	70.2		35.6	28.3	30	60.6	33.1	21.5	28.5	Unique	82.51	High	0	8.812e-06
FALSE	High	FGPVDSTLGFLPWHIR	1xTMT6plex [N-Term]	2.78852e-06	0	1	1	1	Q96E22	0	2071.13	High	Not Found	High	High	High	High	High	High	High	14.4		6.8	13.5	17.2	14.7	16.8	10.9	18	Unique	45.78	High	0	3.116e-06
FALSE	High	ELILTVLSVPPHEADNLDPSDDSLGQSFYDYTEK	3xTMT6plex [N-Term; S8; K34]; 1xDeamidated [Q26]	2.3148e-07	0	1	3	1	Q96L92	0	4496.29	High	Not Found	High	High	High	High	High	High	High	9.2		1.8	1.5	9	3.3	7.6	2	2.3	Unique	51.04	High	0	2.738e-07
FALSE	High	ELILTVLSVPPHEADNLDPSDDSLGQSFYDYTEK	3xTMT6plex [N-Term; S8; K34]	1.80684e-06	0	1	3	1	Q96L92	0	4495.3	High	Not Found	Not Found	High	High	High	High	High	High	3.1			1.8	5.9	2.8	6.3	2.6	2	Unique	48.73	High	0	2.031e-06
FALSE	High	NILLTNEQLESAR	1xTMT6plex [N-Term]	2.04145e-05	0	1	5	1	Q9H9B4	0	1729.96	High	Not Found	High	High	High	High	High	High	High	61.3		15.5	14.2	39.7	40	41.7	30.3	38.7	Unique	57.34	High	0	2.164e-05
FALSE	High	FGGIDILVNNASAISLTNTLDTPTKR	2xTMT6plex [N-Term; K25]	4.16932e-05	0	1	1	1	Q6YN16	1	3189.79	High	Not Found	High	High	High	High	High	High	High	52.2		39.5	18.2	41.4	55.2	39.8	20.3	33.6	Unique	47.01	High	0	4.357e-05
FALSE	High	GLCAIAQAESLR	1xTMT6plex [N-Term]; 1xCarbamidomethyl [C3]	5.27514e-06	0	1	5	3	P23396	0	1517.83	High	High	High	High	High	High	High	High	High	201.3	31.8	83.2	125.1	142.1	117.5	188.3	138.9	93	Unique	76.67	High	0	5.797e-06
FALSE	High	GLCAIAQAESLR	2xTMT6plex [N-Term; S10]; 1xCarbamidomethyl [C3]	8.21159e-06	0	1	5	1	P23396	0	1746.99	High	High	High	High	High	High	High	High	High	109.3	2.9	20.7	26	89.6	72.6	104	86.8	61.3	Unique	33.86	High	0	8.901e-06
FALSE	High	KEDWNEIDPIK	3xTMT6plex [N-Term; K1; K11]	7.11879e-05	0	1	1	2	Q10471	1	2074.18	High	High	High	High	High	High	High	High	High	1145.5	2.3	230.4	470	680.8	268.7	781	416.2	213.3	Unique	40.28	High	0	0.0001358
FALSE	High	LDADMPEVAVEGPNGK	2xTMT6plex [N-Term; K16]	2.90564e-05	0	1	1	1	Q09666	0	2100.1	High	High	High	High	High	High	High	High	High	267	2.6	128.9	113.2	149.5	194.1	167.5	101.7	143	Unique	55.96	High	0	3.059e-05
FALSE	High	KVEHPVEMGLDLEQSLR	2xTMT6plex [N-Term; K1]	3.63662e-07	0	1	5	1	Q7Z7L1	1	2438.35	High	High	High	High	High	High	High	High	High	63.6	1.4	19.4	56.3	52	38.9	86.5	58.3	41.6	Unique	39.15	High	0	4.264e-07
FALSE	High	LAATNALLNSLEFTK	2xTMT6plex [N-Term; K15]	1.54059e-06	0	1	3	2	Q14974	0	2064.21	High	Not Found	High	High	High	High	High	High	High	407.4		175.2	158	186.6	296.9	234.7	157.7	153.5	Unique	57.62	High	0	6.861e-06
FALSE	High	NLFPSNLVVAAFR	1xTMT6plex [N-Term]	2.96684e-06	0	1	1	1	P43007	0	1676.97	High	Not Found	High	High	High	High	High	High	High	17.8		8.3	8.3	10.5	7.9	19.7	13.4	16.1	Unique	66.94	High	0	3.29e-06
FALSE	High	GLAPAEISAVCEK	2xTMT6plex [N-Term; K13]; 1xCarbamidomethyl [C11]	5.0918e-07	0	1	2	1	Q86WV6	0	1803.01	High	Not Found	High	High	High	High	High	High	High	40.5		29	19	12.6	45	18.7	14.6	40.2	Unique	81.33	High	0	5.918e-07
FALSE	High	SQAWQPLVEGSENK	2xTMT6plex [N-Term; K14]	0.000113865	0	1	4	1	O95425-4	0	2031.09	High	Not Found	High	High	High	High	High	High	High	134		105.2	65.9	90	156.4	69.4	61.7	86.2	Unique	30.62	High	0	0.0001159
FALSE	High	MVGGIAQIIAAQEEMLRK	2xTMT6plex [N-Term; K18]	6.17804e-11	0	1	1	2	Q9Y490	1	2416.38	High	Not Found	High	High	High	High	High	High	High	33.4		147.8	44.6	134.5	199.7	159.6	70.1	54.5	Unique	85.46	High	0	8.999e-11
FALSE	High	DASLMVTNDGATILK	2xTMT6plex [N-Term; K15]	2.52825e-08	0	1	4	1	P78371	0	2007.12	High	Not Found	High	High	High	High	High	High	High	370.9		208.1	138.2	150.3	305.1	145.7	104.6	169.7	Unique	108.76	High	0	3.176e-08
FALSE	High	YFDSGDYNMAK	2xTMT6plex [N-Term; K11]	4.67408e-05	0	2	15	1	H3BMD8; Q5T5H1	0	1768.86	High	Not Found	High	High	High	High	High	High	High	116.4		141.3	97.9	132.5	159.9	165.7	122.1	92.3	NotUnique	72.44	High	0	4.836e-05
FALSE	High	DTMLAAAAVYR	1xTMT6plex [N-Term]	0.000112884	0	1	2	1	Q5TEU4	0	1410.76	High	Not Found	High	High	High	High	High	High	High	25.9		17.8	15.3	18.6	23.9	19.7	16.8	15.7	Unique	43.7	High	0	0.0001151
FALSE	High	VDVIPVNLPGEHGQR	1xTMT6plex [N-Term]	0.000112884	0	2	15	1	P02751-10; P02751	0	1859.03	High	High	High	High	High	High	High	High	High	462.3	8.7	38.2	283.1	342	111.4	289.2	149	119.6	NotUnique	40.72	High	0	0.0001151
FALSE	High	LLLWAQNELDQK	2xTMT6plex [N-Term; K12]	3.49635e-05	0	1	1	1	Q9NWU2	0	1929.12	High	High	High	High	High	High	High	High	High	99.6	1.6	62.7	39.4	40.7	82.2	42.9	26.7	52.2	Unique	56.16	High	0	3.647e-05
FALSE	High	DKGGINLTATCPQSELDAETVK	3xTMT6plex [N-Term; K2; K22]; 1xCarbamidomethyl [C11]	1.03268e-10	0	1	1	1	Q9Y295	1	3034.63	High	Not Found	High	High	High	High	High	High	High	220.7		80.8	116.2	149.8	112.6	209.4	144.2	149.6	Unique	118	High	0	1.49e-10
FALSE	High	DQLRPTQLLQNVAR	1xTMT6plex [N-Term]	6.88109e-07	0	2	5	1	Q9NZM1; Q9NZM1-3	0	1881.09	High	High	High	High	High	High	High	High	High	65.1	1	41.4	35.6	41.9	52.6	45.4	30.8	39.6	NotUnique	54.35	High	0	7.922e-07
FALSE	High	SAALPIFSSFVSNWDEATKR	2xTMT6plex [N-Term; K19]	1.01532e-08	0	1	4	2	O76021	1	2684.44	High	Not Found	High	High	High	High	High	High	High	48.2		7.5	54.2	60.4	35.8	41	34.4	34.5	Unique	71.42	High	0	1.299e-08
FALSE	High	FATEYCNTIEGTAK	2xTMT6plex [N-Term; K14]; 1xCarbamidomethyl [C6]	6.07862e-07	0	2	9	1	O00429-4; O00429	0	2063.05	High	Not Found	High	High	High	High	High	High	High	29		5.8	9.3	6.4	14.4	13	6.5	8.7	NotUnique	64.89	High	0	7.008e-07
FALSE	High	LNSLCMAWLVDHVYAIR	1xTMT6plex [N-Term]; 1xCarbamidomethyl [C5]	6.35165e-08	0	2	7	1	P30154-2; P30153	0	2290.2	High	Not Found	High	High	High	High	High	High	High	25.2		7.4	7.6	6.8	10.4	4.9	2.8	7.3	NotUnique	65.86	High	0	7.809e-08
FALSE	High	MMEVAAADVK	2xTMT6plex [N-Term; K10]	1.85243e-05	0	1	15	1	Q96KP4	0	1522.84	High	Not Found	High	High	High	High	High	High	High	157.9		199.7	84	85.2	278.7	84.3	61.5	105.7	Unique	72.45	High	0	1.965e-05
FALSE	High	EWLTELFQQSK	2xTMT6plex [N-Term; K11]	5.52247e-05	0	1	6	1	D3DQV9	0	1867.04	High	Not Found	High	High	High	High	High	High	High	56.5		16.4	26	24.4	17.3	27.7	16.9	18.5	Unique	50.61	High	0	5.702e-05
FALSE	High	HDPTSANLLQLVR	1xTMT6plex [N-Term]	1.43363e-05	0	1	2	1	Q9BZL6-3	0	1692.96	High	Not Found	High	High	High	High	High	High	High	33.2		19.3	13.2	12.9	29.1	16.1	9.8	14.3	Unique	46.34	High	0	1.537e-05
FALSE	High	IGSTIDDTISK	2xTMT6plex [N-Term; K11]	0.000142459	0	1	3	1	Q14677	0	1607.93	High	Not Found	High	High	High	High	High	High	High	97.3		49	34.1	37.1	58.4	40.5	22.4	30.5	Unique	51.09	High	0	0.0001446
FALSE	High	FIDNMLMGSGAFVK	2xTMT6plex [N-Term; K14]	0.000140033	0	1	4	1	Q9UPY3	0	1988.07	High	Not Found	High	High	High	High	High	High	High	26.9		13.9	11.3	16.3	15.8	15.5	15.2	11.4	Unique	35.25	High	0	0.000142
FALSE	High	SALTVQFVQGIFVEK	2xTMT6plex [N-Term; K15]	2.39829e-07	0	2	20	10	P61224; P62834	0	2124.25	High	Not Found	High	High	High	High	High	High	High	1283.3		830.8	743.2	941.4	1004.2	938.8	651.3	822.8	NotUnique	45.68	High	0	2.845e-07
FALSE	High	LGFFGTGECFVFR	1xTMT6plex [N-Term]; 1xCarbamidomethyl [C9]	4.78566e-06	0	1	2	1	Q9ULP9	0	1765.89	High	Not Found	High	High	High	Not Found	Not Found	Not Found	High	8.7		2.1	2.1	2.5				1.6	Unique	64.01	High	0	5.237e-06
FALSE	High	YGKIETIEVMEDR	2xTMT6plex [N-Term; K3]	3.9899e-05	0	1	2	1	P51991	1	2041.1	High	Not Found	High	High	High	High	High	High	High	53.4		38.1	72.3	155.4	149.9	147.1	86.1	66	Unique	47.31	High	0	4.15e-05
FALSE	High	VALSECYTVASVAEMPQNYRPHPQR	1xTMT6plex [N-Term]; 1xCarbamidomethyl [C6]	5.76401e-07	0	1	1	1	Q14258	0	3132.56	High	High	High	High	High	High	High	High	High	84.3	4.1	72.4	55	44.4	60.2	56.7	35.1	52.9	Unique	57.35	High	0	6.677e-07
FALSE	High	ATYIQTIEEGINTHTHAAK	2xTMT6plex [N-Term; K19]	8.18572e-05	0	1	5	1	O95425-4	0	2556.38	High	High	High	High	High	High	High	High	High	112.7	3	127.9	63.4	63.9	138.4	55.9	39.4	76.6	Unique	50.5	High	0	8.4e-05
FALSE	High	IMQEYQLEQK	2xTMT6plex [N-Term; K10]	0.000118893	0	1	1	1	Q9P032	0	1767.97	High	Not Found	High	High	High	High	High	High	High	318.4		120.8	166.5	242.5	203.1	268.1	138.2	177.1	Unique	30.69	High	0	0.0001215
FALSE	High	TIPDVFPHLPLIAITR	1xTMT6plex [N-Term]	4.1328e-05	0	1	2	1	K7EKE6	0	2032.22	High	High	High	High	High	High	High	High	High	186.2	6.7	108.2	68.6	153.8	159.2	128	70.3	100.3	Unique	41.84	High	0	4.287e-05
FALSE	High	DNYVPEVSALDQEIIEVDPDTK	2xTMT6plex [N-Term; K22]; 1xDeamidated [N/Q]	3.3584e-06	0	1	3	2	P08708	0	2948.5	High	Not Found	High	High	High	High	High	High	High	20.4		7.7	14	15.9	16.6	22.2	20.9	13.3	Unique	45.74	High	0	3.736e-06
FALSE	High	YAHWVVSQPPDTYLKPLMTELLK	3xTMT6plex [N-Term; K15; K23]	5.61235e-06	0	1	3	1	Q92973	0	3416.93	High	Not Found	High	High	High	High	High	High	High	23.2		25	28.7	21.4	14.2	12.7	11.3	13.8	Unique	31.05	High	0	6.124e-06
FALSE	High	EAAFSLAEAK	2xTMT6plex [N-Term; K10]	7.37196e-05	0	1	7	1	Q9Y5K8	0	1494.86	High	High	High	High	High	High	High	High	High	111.5	1.3	53.6	52.2	86.9	74.7	59.8	48.2	53.1	Unique	54.79	High	0	7.548e-05
FALSE	High	LMVSGSAALPLPVLEK	2xTMT6plex [N-Term; K16]	1.95326e-05	0	1	6	2	Q4G176	0	2083.26	High	Not Found	High	High	High	High	High	High	High	306.1		213.1	192.3	304.3	347.1	260.6	172.6	237.5	Unique	44.69	High	0	6.585e-05
FALSE	High	FGQDIISPLLSVK	2xTMT6plex [N-Term; K13]	7.38636e-07	0	1	7	2	Q8WVM8	0	1875.14	High	Not Found	High	High	High	High	High	High	High	586.7		175.9	205	346.6	327.9	316.1	186.3	233.3	Unique	54	High	0	8.524e-07
FALSE	High	DGHNLISLLEVLSGDSLPR	2xTMT6plex [N-Term; S]	8.81489e-08	0	4	12	2	Q15149-4; Q15149; Q15149-3; E9PKG0	0	2493.41	High	Not Found	High	High	High	High	High	High	High	199.4		44.3	38.2	54.9	78.8	53.7	42.3	67.2	NotUnique	31.35	High	0	1.071e-07
FALSE	High	EQLQALIPYVLNPSK	2xTMT6plex [N-Term; K15]	2.5074e-06	0	1	2	1	Q6DD88	0	2171.28	High	Not Found	High	High	High	High	High	High	High	130.9		95.9	29	43.4	40.7	33.6	13.8	30.5	Unique	31.06	High	0	2.79e-06
FALSE	High	LESGHLPSMQQLVQILDNEMK	3xTMT6plex [N-Term; S8; K21]	4.1328e-05	0	1	3	1	A0A087WVA1	0	3097.7	High	Not Found	High	High	High	High	High	High	High	101		18.7	38.6	49.4	24.6	43.3	26.6	22.1	Unique	20.79	High	0	4.312e-05
FALSE	High	TQPILDILLK	2xTMT6plex [N-Term; K10]	6.81433e-05	0	1	2	1	Q9Y376	0	1612.04	High	Not Found	High	High	High	High	High	High	High	162.7		73.5	55.9	53.8	143.5	63.2	41.8	62.9	Unique	67.42	High	0	7.006e-05
FALSE	High	LGLGIDEDDPTADDTSAAVTEEMPPLEGDDDTSRMEEVD	1xTMT6plex [N-Term]	5.46569e-07	0	1	2	1	P07900-2	1	4379.92	Not Found	Not Found	High	Not Found	High	High	High	High	High			7.5		1.2	8	1.2	2.7	2	Unique	79.84	High	0	6.334e-07
FALSE	High	LNQENEHIYNLWCSGR	1xTMT6plex [N-Term]; 1xCarbamidomethyl [C13]	3.04671e-06	0	1	2	1	Q96A33	0	2262.09	High	High	High	High	High	High	High	High	High	131.9	3.6	25.6	86.8	134.2	35.6	101.2	66.5	37.9	Unique	37.16	High	0	3.377e-06
FALSE	High	FLPHGQLLFLNDQFVQGLEK	2xTMT6plex [N-Term; K20]	1.05233e-07	0	1	1	1	Q9NUS5	0	2801.58	High	High	High	High	High	High	High	High	High	14.2	1.3	6.3	14.8	15.4	8.4	14.6	7.5	10.4	Unique	47.56	High	0	1.275e-07
FALSE	High	YYTSASGDEMVSLKDYCTR	2xTMT6plex [N-Term; K14]; 1xCarbamidomethyl [C17]	7.76839e-05	0	1	2	3	P07900-2	1	2704.3	High	Not Found	High	High	High	High	High	High	High	17.8		144.7	26.3	73.3	276.2	95.7	70.7	110.7	Unique	53.12	High	0	7.972e-05
FALSE	High	LFVFGLQGEIVEQPR	1xTMT6plex [N-Term]	3.65373e-05	0	1	3	1	Q96Q05-2	0	1961.11	High	Not Found	High	High	High	High	High	High	High	11.3		7.8	6.5	8.8	6.8	6	3.4	3.1	Unique	47.04	High	0	3.815e-05
FALSE	High	AVLICLAQLGEPELR	1xTMT6plex [N-Term]; 1xCarbamidomethyl [C5]	7.50184e-05	0	1	2	1	Q9Y4R8	0	1911.09	High	High	High	High	High	High	High	High	High	68.5	2.7	31.4	36.4	41	46.5	45.8	29.1	26.8	Unique	52.45	High	0	7.722e-05
FALSE	High	DNYVPEVSALDQEIIEVDPDTK	2xTMT6plex [N-Term; K22]	2.0235e-05	0	1	3	6	P08708	0	2947.52	High	Not Found	High	High	High	High	High	High	High	842.4		213.9	284.4	390.9	321.8	466.7	352.5	292	Unique	63.01	High	0	2.632e-05
FALSE	High	MSYLELMEHPFFTLHK	2xTMT6plex [N-Term; K16]	1.32525e-06	0	1	3	1	P46734-3	0	2481.31	High	Not Found	High	High	High	High	High	High	High	56.5		27.3	38.2	30.1	41.1	49.6	23.6	29.7	Unique	30.95	High	0	1.499e-06
FALSE	High	TLAVGLINMAEVMQHPNEGALVLGLHSNVK	2xTMT6plex [N-Term; K30]	3.12593e-09	0	1	3	1	Q6VY07	0	3614	High	Not Found	High	High	High	High	High	High	High	29.9		17.5	12.9	30.7	26.9	25	13.4	15.8	Unique	82.38	High	0	4.115e-09
FALSE	High	DNIACVILTFKEPFGTEGR	2xTMT6plex [N-Term; K11]; 1xCarbamidomethyl [C5]	1.71334e-06	0	1	6	2	P11413-2	1	2625.41	High	Not Found	High	High	High	High	High	High	High	42.5		78.1	36.7	60.5	145.8	42	29.4	44.6	Unique	42.94	High	0	1.937e-06
FALSE	High	EISLWFKPEELVDYK	3xTMT6plex [N-Term; K7; K15]	5.01432e-05	0	1	3	3	Q32Q12	0	2583.47	High	Not Found	High	High	High	High	High	High	High	234.6		174.4	153.4	164.6	285.4	130.5	115.6	150.2	Unique	31.25	High	0	5.219e-05
FALSE	High	SPFEVQVGPEAGMQK	2xTMT6plex [N-Term; K15]	7.63397e-05	0	1	10	2	O75369-8	0	2062.1	High	High	High	High	High	High	High	High	High	489.9	8.9	428.8	210.3	274.3	478.4	243.2	155.6	219.9	Unique	49.67	High	0	7.815e-05
FALSE	High	SPFEVQVGPEAGMQK	2xTMT6plex [N-Term; K15]; 1xOxidation [M13]	0.000142459	0	1	10	2	O75369-8	0	2078.1	High	Not Found	High	High	High	High	High	High	High	80.4		74.6	41.4	60.2	93.6	54.7	36.9	49.1	Unique	40.41	High	0	0.0001444
FALSE	High	LGIYTVLFER	1xTMT6plex [N-Term]	0.000131854	0	1	3	2	Q02978	0	1439.85	High	High	High	High	High	High	High	High	High	184.3	14	86.6	89.3	125.3	81.8	100.5	18.5	46.4	Unique	70.6	High	0	0.0001343
FALSE	High	SFKPDFGAESIYGGFLLGVR	2xTMT6plex [N-Term; K3]	5.45753e-11	0	1	3	2	P35606	0	2618.44	High	Not Found	High	High	High	High	High	High	High	302.3		218.6	107.8	151.9	255.6	168.5	111.7	128.2	Unique	79.01	High	0	8.022e-11
FALSE	High	IPVPILPGLPMNNHGNYIVR	1xTMT6plex [N-Term]; 1xDeamidated [N]	4.00904e-06	0	1	2	2	Q16134	0	2444.37	High	High	High	High	High	High	High	High	High	47.5	1.4	21.3	27.7	38.3	39.8	27.1	21.2	28	Unique	51.26	High	0	4.417e-06
FALSE	High	IPVPILPGLPMNNHGNYIVR	1xTMT6plex [N-Term]	2.8631e-07	0	1	2	2	Q16134	0	2443.38	High	High	High	High	High	High	High	High	High	126.5	2.1	61.7	66.1	67.9	106	56.7	45.2	69.7	Unique	63.83	High	0	3.367e-07
FALSE	High	INISQVIAVVGQQNVEGK	2xTMT6plex [N-Term; K18]	1.82291e-06	0	1	1	1	P24928	0	2354.38	High	Not Found	High	High	High	High	High	High	High	69.5		19.9	41.2	32.7	41	35.2	26	38.8	Unique	60.5	High	0	2.045e-06
FALSE	High	YYPASPWVDNSR	1xTMT6plex [N-Term]	3.71864e-05	0	2	6	1	P54289-4; P54289	0	1683.83	High	High	High	High	High	High	High	High	High	80.6	1.4	25.2	31.5	49.8	26	55.2	31.6	12.8	NotUnique	44.82	High	0	3.866e-05
FALSE	High	LASLFGLDQAAAGHGNEFFQYTAPK	2xTMT6plex [N-Term; K25]	1.99172e-06	0	1	5	2	A0A0A0MT60	0	3111.63	High	Not Found	High	High	High	High	High	High	High	113.1		53.9	31.9	61.6	74.4	54.4	29.5	48.2	Unique	63.64	High	0	2.238e-06
FALSE	High	SYLAPGLLQGQVAIVTGGATGIGK	2xTMT6plex [N-Term; K24]	7.44992e-06	0	1	2	1	Q9BY49	0	2729.6	High	Not Found	High	High	High	High	High	High	High	10.8		3	8.7	8.3	6.3	10.2	5.5	1.7	Unique	54.81	High	0	8.066e-06
FALSE	High	GFYPQYGALETR	1xTMT6plex [N-Term]	2.15253e-05	0	1	4	1	Q63ZY3	0	1630.84	High	High	High	High	High	High	High	High	High	24.7	2.7	17.2	14	12.6	22.6	11.4	8.4	17	Unique	66.03	High	0	2.28e-05
FALSE	High	HVLVILTDMSSYAEALR	1xTMT6plex [N-Term]	9.71699e-08	0	1	3	4	P21281	0	2147.17	High	High	High	High	High	High	High	High	High	170.7	4	117.9	95.8	166.7	143.1	149.9	119.2	141.2	Unique	84.48	High	0	1.177e-07
FALSE	High	LPETNLFETEETRK	2xTMT6plex [N-Term; K14]	3.06347e-05	0	1	2	1	Q15046-2	1	2165.19	High	Not Found	High	High	High	High	High	High	High	61.4		62.4	34.2	41	70	45.7	35.3	50.3	Unique	27.14	High	0	3.21e-05
FALSE	High	LVAEFTTSLTNFQK	2xTMT6plex [N-Term; K14]	3.46569e-05	0	1	2	2	O15400	0	2057.17	High	Not Found	High	High	High	High	High	High	High	308.9		198.7	212.3	265.6	235.8	276.4	178.3	196.2	Unique	33.84	High	0	3.637e-05
FALSE	High	ITFPCISDMIK	2xTMT6plex [N-Term; K11]; 1xCarbamidomethyl [C5]	2.90564e-05	0	2	2	1	P07948; P07948-2	0	1782.99	High	Not Found	High	High	High	High	High	High	High	18.6		12.9	14.7	21.5	17.2	12.5	15	16.5	NotUnique	53.25	High	0	3.056e-05
FALSE	High	VYFPEQIHDVVR	1xTMT6plex [N-Term]	1.61034e-06	0	1	6	2	A0A0R4J2G3	0	1730.94	High	High	High	High	High	High	High	High	High	321.2	14.1	89.5	126.5	147.6	115	135.2	80.5	83.1	Unique	72.03	High	0	1.819e-06
FALSE	High	YSNIMISQFGFPYANYK	2xTMT6plex [N-Term; K17]	4.66023e-06	0	1	1	1	Q9UBQ6	0	2501.29	High	Not Found	High	High	High	High	High	High	High	76.8		14.4	30.8	68.8	25.1	59.6	30.2	20.5	Unique	43.74	High	0	5.135e-06
FALSE	High	ADIKEMGLSLQWLYSAR	2xTMT6plex [N-Term; K4]	2.66775e-06	0	1	3	1	P02786	1	2439.35	High	Not Found	High	High	High	High	High	High	High	3.3		2	3.5	17.8	5.8	25.3	11.4	6.3	Unique	30.27	High	0	2.98e-06
FALSE	High	TFIGPGGNMPGYLRPETAQGIFLNFK	2xTMT6plex [N-Term; K26]	1.61034e-06	0	1	1	2	P41250	0	3283.77	High	Not Found	High	High	High	High	High	High	High	78.7		51.3	28.1	53.8	86.6	42.4	33.9	46.2	Unique	78.21	High	0	1.821e-06
FALSE	High	KPDDLPAFPLFSAFGR	2xTMT6plex [N-Term; K1]	6.82042e-07	0	1	3	1	Q8IWA5-3	0	2236.25	High	High	High	High	High	High	High	High	High	149	1.1	40.7	125.5	142.4	61.9	130	95.2	39.2	Unique	51.23	High	0	7.883e-07
FALSE	High	LLSAQLLSGGLINSNSGQR	1xTMT6plex [N-Term]	1.92191e-07	0	1	3	1	Q03001	0	2157.22	High	Not Found	High	High	High	High	High	High	High	71.7		66.5	37.6	58.3	93.8	49.4	44.7	64.2	Unique	67.89	High	0	2.292e-07
FALSE	High	CVINATGPFTDSVR	1xTMT6plex [N-Term]; 1xCarbamidomethyl [C1]	2.35618e-07	0	1	3	1	P43304	0	1765.91	High	Not Found	High	High	High	High	High	High	High	71		14.2	20.9	42	51.8	49.2	25.1	39.1	Unique	79.96	High	0	2.799e-07
FALSE	High	TKTETITGFQVDAVPANGQTPIQR	2xTMT6plex [N-Term; K2]	7.56763e-05	0	2	16	1	P02751-10; P02751	1	3030.66	High	Not Found	High	High	High	High	High	High	High	193		9.4	100.7	243.6	69.3	205.7	88.5	55.9	NotUnique	56.59	High	0	7.76e-05
FALSE	High	TKTETITGFQVDAVPANGQTPIQR	2xTMT6plex [N-Term; K2]; 1xDeamidated [N/Q]	1.07074e-08	0	2	16	3	P02751-10; P02751	1	3031.65	High	High	High	High	High	High	High	High	High	523.7	0.1	32.4	310.1	628.3	189.8	474.6	267.6	175.4	NotUnique	90.78	High	0	4.552e-08
FALSE	High	TGLFTPDLAFEAIVKK	3xTMT6plex [N-Term; K15; K16]	5.66968e-05	0	1	3	1	P50570	1	2437.47	High	Not Found	High	High	High	High	High	High	High	17.4		34	11.1	89.9	50.3	98.5	48.2	22.8	Unique	52.2	High	0	5.842e-05
FALSE	High	LLQLDKEFQLFQGVTR	2xTMT6plex [N-Term; K6]	0.000129603	0	1	2	1	Q9UET6	1	2393.4	High	Not Found	High	High	High	High	High	High	High	13.4		15.4	13.2	25.6	17.9	19.5	16.7	11	Unique	38.95	High	0	0.0001323
FALSE	High	SVSAFAPICNPVLCPWGK	2xTMT6plex [N-Term; K18]; 2xCarbamidomethyl [C9; C14]	1.48697e-06	0	1	4	1	P10768	0	2461.31	High	Not Found	High	High	High	High	High	High	High	219.6		177.8	133.7	150.7	324.7	105	121.3	167.9	Unique	62.87	High	0	1.688e-06
FALSE	High	LMSSLPNFCGIFNHLER	1xTMT6plex [N-Term]; 1xCarbamidomethyl [C9]	1.32397e-05	0	1	7	1	Q96PU8-3	0	2264.15	High	High	High	High	High	High	High	High	High	97.6	2.2	24.4	59	57.7	42.3	56.7	40.7	44	Unique	67.87	High	0	1.419e-05
FALSE	High	ILLGSEQGSLQLWNVK	2xTMT6plex [N-Term; K16]	1.5543e-06	0	1	2	1	Q8NI36	0	2243.32	High	Not Found	High	High	High	High	High	High	High	70.7		11.2	49.7	38.5	37.1	43.6	27.8	28.1	Unique	48.58	High	0	1.756e-06
FALSE	High	AWDVLLDHIQSAALSK	2xTMT6plex [N-Term; K16]	6.58173e-06	0	1	6	1	A0A286YFF8	0	2225.27	High	Not Found	High	High	High	High	High	High	High	60.3		35.5	26.3	14.3	28.1	19.7	12.4	14.8	Unique	39.33	High	0	7.176e-06
FALSE	High	IIEEAPAPGIK	2xTMT6plex [N-Term; K11]	0.000118893	0	1	5	1	Q96RQ3	0	1595.98	High	Not Found	High	High	High	High	High	High	High	107.8		76.9	66.9	114.4	138.3	93.5	53.6	107.6	Unique	75.54	High	0	0.0001211
FALSE	High	SWWDAVCTLIHR	1xTMT6plex [N-Term]; 1xCarbamidomethyl [C7]	7.85618e-06	0	1	14	1	P49792	0	1772.91	High	Not Found	High	High	High	High	High	High	High	64.4		7.8	34	35.7	18.4	34.1	23.5	21.8	Unique	42.95	High	0	8.54e-06
FALSE	High	LPTSALVNLSHGSR	1xTMT6plex [N-Term]	3.8519e-05	0	1	3	1	Q8IZH2	0	1680.96	High	High	High	High	High	High	High	High	High	31.8	2.7	32.1	38.7	32.2	33	37.7	22.5	26.3	Unique	41.11	High	0	4.035e-05
FALSE	High	VVLPTFILEPR	1xTMT6plex [N-Term]	3.95495e-05	0	1	5	1	Q9BZF1	0	1512.94	High	High	High	High	High	High	High	High	High	76.4	3.4	39.1	49.3	54.8	47.8	53.3	36	40.9	Unique	56.82	High	0	4.132e-05
FALSE	High	ALKDQINQLELLLK	3xTMT6plex [N-Term; K3; K14]	1.37163e-05	0	2	6	1	Q13439; Q13439-5	1	2326.47	High	Not Found	High	High	High	High	High	High	High	166.3		60.5	90.7	131.9	87.5	163.7	90.1	64.6	NotUnique	49.71	High	0	1.463e-05
FALSE	High	VPRPDALDNESWGFVHPR	1xTMT6plex [N-Term]	1.42101e-05	0	1	4	2	Q86VR2	0	2321.2	High	High	High	High	High	High	High	High	High	74.6	2.1	66.6	66.1	58.9	64.7	69.4	43.3	49.4	Unique	46.5	High	0	2.274e-05
FALSE	High	LSDGFVAAEAK	2xTMT6plex [N-Term; K11]	0.000126296	0	1	2	1	Q6R327-3	0	1565.89	High	Not Found	High	High	High	High	High	High	High	41.4		20.2	23.1	32.9	32.1	42	25	23.5	Unique	58.92	High	0	0.0001283
FALSE	High	QTIDNSQGAYQEAFDISKK	3xTMT6plex [N-Term; K18; K19]	6.07418e-09	0	1	1	1	P27348	1	2830.52	High	Not Found	High	High	High	High	High	High	High	44.4		117.1	43.1	73	175.4	90.9	56.9	54.9	Unique	82.6	High	0	7.867e-09
FALSE	High	SPYQEFTDHLVK	2xTMT6plex [N-Term; K12]	3.83543e-06	0	1	3	3	P15880	0	1922.04	High	High	High	High	High	High	High	High	High	481.6	3.9	190.7	261.3	389.2	302.7	566	350.1	246.4	Unique	48.96	High	0	4.242e-06
FALSE	High	DVMQNHLLQMLCLVAMEKPASTNSDDVR	2xTMT6plex [N-Term; K18]; 1xCarbamidomethyl [C12]	5.04673e-06	0	1	5	1	P11413-2	0	3673.86	High	Not Found	High	High	High	High	High	High	High	31.4		17.8	13.3	8.9	22.7	8.7	9	14.5	Unique	55.81	High	0	5.559e-06
FALSE	High	ENLDPSNLMPPPNQTPAPDQPFALSTVR	1xTMT6plex [N-Term]	0.000147431	0	1	1	1	P53701	0	3275.66	High	Not Found	Not Found	High	High	High	High	High	High	10.9			3	2	1.5	3.1	1.9	2	Unique	53.5	High	0	0.0001495
FALSE	High	RFPLYPLDFTDGIIGK	2xTMT6plex [N-Term; K16]	9.62931e-06	0	1	4	1	Q8NBS3-4	1	2310.33	High	Not Found	High	High	High	High	High	High	High	21		11.3	14.8	14.8	19.6	14.4	12.6	16.9	Unique	45.59	High	0	1.04e-05
FALSE	High	TLLPMPGVMVGDIGK	2xTMT6plex [N-Term; K15]	5.0469e-07	0	1	2	1	O15254	0	1986.15	High	Not Found	High	High	High	High	High	High	High	57.2		21	22.3	28.6	25.9	21.4	12.5	19.9	Unique	115.24	High	0	5.854e-07
FALSE	High	MLGLTVSLIQDAGR	1xTMT6plex [N-Term]	2.91319e-08	0	1	2	2	J3KQ48	0	1702.97	High	High	High	High	High	High	High	High	High	151.1	1.5	63	68.3	129.6	116	115.6	59.9	84.2	Unique	99.55	High	0	3.644e-08
FALSE	High	DAFLGSFLYEYSR	1xTMT6plex [N-Term]	2.99323e-06	0	1	1	4	cRAP087	0	1796.91	High	Not Found	High	High	High	High	High	High	High	109.6		62.4	14.7	61.2	85.1	18.5	32.3	36.9	Unique	83.98	High	0	1.321e-05
FALSE	High	LFTAESLIGLK	2xTMT6plex [N-Term; K11]	5.56289e-06	0	1	3	2	P48444	0	1650.02	High	Not Found	High	High	High	High	High	High	High	750.8		356.1	235.4	234.1	443.9	288.4	174.7	211	Unique	77.85	High	0	6.083e-06
FALSE	High	ILHTLLASGEDALDFTQESEPSYISDVGPPGR	1xTMT6plex [N-Term]	5.33205e-05	0	1	6	1	Q8N1F7	0	3643.83	High	Not Found	High	High	High	High	High	High	High	21.3		4.9	13.5	7.7	9.7	12.2	8	3.1	Unique	79.95	High	0	5.51e-05
FALSE	High	VLPAQATEYAFAFIQVPQDDDAR	1xTMT6plex [N-Term]	3.32588e-09	0	1	1	1	Q7KZF4	0	2794.42	High	High	High	High	High	High	High	High	High	96.6	7.1	37.5	88.9	94	57.8	80.2	70.1	57.9	Unique	76.93	High	0	4.404e-09
FALSE	High	HLYPNTPYAYTFWTYMMNAR	1xTMT6plex [N-Term]	5.71961e-05	0	1	1	1	P27695	0	2769.32	High	Not Found	Not Found	High	High	High	High	Not Found	Not Found	2.6			2.8	1.8	6.7	10.2			Unique	39.43	High	0	5.891e-05
FALSE	High	GSNTCEVHFENTK	2xTMT6plex [N-Term; K13]; 1xCarbamidomethyl [C5]	7.38428e-06	0	1	2	3	Q9H845	0	1980.98	High	High	High	High	High	High	High	High	High	551.5	7.2	352.6	368.6	369.4	438.4	365.7	247.1	398.2	Unique	42.02	High	0	1.858e-05
FALSE	High	LPISVDSPPAAADSNTTAASNVDKVQESR	2xTMT6plex [N-Term; K24]	2.55221e-06	0	1	7	1	Q3V6T2	1	3398.78	High	Not Found	High	High	High	High	High	High	High	9.2		30.2	15.5	35.5	38.2	35.3	22.6	17.3	Unique	39.83	High	0	2.851e-06
FALSE	High	DSHLTLLNQLLQGLR	2xTMT6plex [N-Term; T5]	3.31635e-05	0	1	2	2	Q9NRX2	0	2179.3	High	Not Found	High	High	High	High	High	High	High	189.1		68.1	79	154.6	150.9	136.1	80.3	111.8	Unique	17.92	High	0.0001318	0.0004489
FALSE	High	DSHLTLLNQLLQGLR	1xTMT6plex [N-Term]	1.52701e-06	0	1	2	1	Q9NRX2	0	1950.13	High	Not Found	High	High	High	High	High	High	High	12.1		19.1	18.1	13.2	6	7.5	3.5	7	Unique	57.92	High	0	1.727e-06
FALSE	High	TLKPGTMSVQAFLEEANLMK	3xTMT6plex [N-Term; K3; K20]	5.56289e-06	0	2	2	1	P07948; P07948-2	0	2895.63	High	Not Found	High	High	High	High	High	High	High	229.5		188.6	132.2	188.9	285.4	231.2	172.9	206	NotUnique	33.87	High	0	6.083e-06
FALSE	High	ELAVQIYEEARK	2xTMT6plex [N-Term; K12]	0.000142459	0	2	8	1	O00571; O15523	1	1907.1	High	High	High	High	High	High	High	High	High	106.3	1.3	44.9	34.3	84.9	67.8	100.5	52.2	42.8	NotUnique	29.29	High	0	0.0001447
FALSE	High	EFQQYLPVVMGPLMK	2xTMT6plex [N-Term; K15]; 1xOxidation [M14]	3.14556e-05	0	1	4	1	O00410-3	0	2254.24	High	Not Found	High	High	High	High	High	High	High	45.5		21.7	27.8	22.3	35.1	25.9	23.3	27.6	Unique	43.7	High	0	3.294e-05
FALSE	High	EFQQYLPVVMGPLMK	2xTMT6plex [N-Term; K15]	7.65036e-06	0	1	4	2	O00410-3	0	2238.24	High	Not Found	High	High	High	High	High	High	High	241.4		136.1	108.6	122.8	193.8	150.9	102.9	139.3	Unique	44.64	High	0	8.275e-06
FALSE	High	SSLQSQCLNEVLK	2xTMT6plex [N-Term; K13]; 1xCarbamidomethyl [C7]	6.0242e-06	0	1	2	1	Q14204	0	1964.09	High	Not Found	High	High	High	High	High	High	High	260.9		122.4	73.3	127.7	160	102.6	74.4	109.1	Unique	44.35	High	0	6.553e-06
FALSE	High	QIPAAQEQPFIVSNQNK	2xTMT6plex [N-Term; K17]	2.98352e-05	0	2	2	1	P17301; E7ESP4	0	2370.32	High	High	High	High	High	High	High	High	High	189.5	1.1	55.7	103.8	90.1	61.8	81.3	68.7	29.2	NotUnique	56.71	High	0	3.135e-05
FALSE	High	TLTAVHDAILEDLVFPSEIVGKR	2xTMT6plex [N-Term; K22]	4.08067e-06	0	1	2	2	P62081	1	2981.71	High	Not Found	High	High	High	High	High	High	High	131		78.8	80	439.6	159.7	536.6	194.1	105.9	Unique	46.28	High	0	4.488e-06
FALSE	High	LLSGGSVLDIIK	2xTMT6plex [N-Term; K12]	1.43363e-05	0	1	2	2	O95747	0	1673.06	High	Not Found	High	High	High	High	High	High	High	53		17.9	18.6	20.6	27.7	21.7	13.3	20	Unique	66.9	High	0	1.533e-05
FALSE	High	HVILGTQQFKPNEFASQINLSVENAWGILR	2xTMT6plex [N-Term; K10]	4.51264e-05	0	1	3	1	O15371	0	3868.13	High	Not Found	High	High	High	High	High	High	High	31.8		22.2	34.9	77.2	22	40.1	32.9	26.3	Unique	26.23	High	0	4.685e-05
FALSE	High	SVFFGPDFITVTK	2xTMT6plex [N-Term; K13]	1.20186e-07	0	1	2	2	Q9UMS0	0	1916.09	High	Not Found	High	High	High	High	High	High	High	259.6		105.2	126.8	163.3	168.5	157.3	115	157.1	Unique	91.04	High	0	1.444e-07
FALSE	High	GSIFVVFDSIESAKK	3xTMT6plex [N-Term; K14; K15]	1.01542e-05	0	1	3	1	P05455	1	2314.36	High	Not Found	High	High	High	High	High	High	High	6.8		10.1	7	12	23.2	13.9	15.5	11.2	Unique	33.25	High	0	1.095e-05
FALSE	High	YDNQIHIIDFDDENNIINK	2xTMT6plex [N-Term; K19]	9.45501e-10	0	1	5	1	A8MUM1	0	2791.43	High	Not Found	High	High	High	High	High	High	High	33.5		17.6	23.6	26.1	38.2	30.2	22.2	24.1	Unique	81.2	High	0	1.285e-09
FALSE	High	GKFQDNFEFVQWFK	3xTMT6plex [N-Term; K2; K14]	2.04145e-05	0	1	1	1	Q15691	1	2507.37	High	Not Found	High	High	High	High	High	High	High	122.5		407.6	190.4	370.1	521.6	390.9	252.2	200	Unique	41.49	High	0	2.159e-05
FALSE	High	MPVIKPDIANWELSVK	3xTMT6plex [N-Term; K5; K16]	1.37264e-07	0	1	5	2	P05165	0	2527.49	High	Not Found	High	High	High	High	High	High	High	180		153.6	138.1	226.4	276.4	203	131.2	167.3	Unique	59.39	High	0	1.726e-06
FALSE	High	LLLEHLECLVSR	1xTMT6plex [N-Term]; 1xCarbamidomethyl [C8]	3.75152e-05	0	1	18	1	Q13136	0	1710.98	High	High	High	High	High	High	High	High	High	83.6	7.2	66.9	50.3	55.2	67.6	50.4	33	47.1	Unique	54.71	High	0	3.91e-05
FALSE	High	VDKGVVPLAGTNGETTTQGLDGLSER	2xTMT6plex [N-Term; K3]; 1xDeamidated [N12]	2.90876e-12	0	1	10	1	P04075	1	3073.64	High	Not Found	High	High	High	High	High	High	High	30.3		37.9	54.7	91.9	89.1	84.5	54.3	50.3	Unique	124	High	0	4.58e-12
FALSE	High	LQQEIENLK	2xTMT6plex [N-Term; K9]	0.000108103	0	1	3	1	Q567U6	0	1572.94	High	Not Found	High	High	High	High	High	High	High	64.1		43.9	25.1	34.3	53.2	31	20	36.7	Unique	57.73	High	0	0.0001106
FALSE	High	VIDFDENTALDDAEEESFR	1xTMT6plex [N-Term]	3.26992e-07	0	1	3	2	Q14257-2	0	2444.13	High	Not Found	High	High	High	High	High	High	High	73.3		23.6	31.3	50.8	21.5	51.5	38.6	12.6	Unique	92.05	High	0	3.842e-07
FALSE	High	KAGTQIENIEEDFRDGLK	3xTMT6plex [N-Term; K1; K18]	4.57673e-08	0	1	7	1	P12814	2	2750.53	High	Not Found	High	High	High	High	High	High	High	251.8		390.3	158	289.5	471.2	217.7	120.5	168.8	Unique	61.92	High	0	5.659e-08
FALSE	High	LKPGYLEATVDWFR	2xTMT6plex [N-Term; K2]	0.000112884	0	1	1	2	Q15181	0	2153.22	High	High	High	High	High	High	High	High	High	290.9	1.2	281	139.8	153	374.4	121.4	107.9	145	Unique	37.47	High	0	0.0001148
FALSE	High	KAGTQIENIEEDFRNGLK	3xTMT6plex [N-Term; K1; K18]; 1xDeamidated [N15]	4.57673e-08	0	1	4	1	P35609-2	2	2750.53	High	Not Found	High	High	High	High	High	High	High										NoQuanValues	61.92	High	0	5.659e-08
FALSE	High	ILNPHGIPLGPLDFSTK	2xTMT6plex [N-Term; K17]	2.29354e-08	0	1	5	2	Q86Y07	0	2277.34	High	Not Found	High	High	High	High	High	High	High	241		73.6	127.2	193.2	83.9	182.5	106.7	81.1	Unique	67.53	High	0	2.895e-08
FALSE	High	LIAASSRPNQASSEGQFVVLSSSQSEESDLGEGGK	2xTMT6plex [N-Term; K35]	1.44536e-11	0	1	1	1	Q9UKG1	0	4010.04	High	Not Found	High	High	High	High	High	High	High	11.2		5.8	3.7	7.5	8.7	8.9	8.8	2.8	Unique	97.61	High	0	2.186e-11
FALSE	High	DIINMLFYHDR	1xTMT6plex [N-Term]	4.20615e-05	0	1	3	1	P06737	0	1665.86	High	Not Found	High	High	High	High	High	High	High	30.7		11.7	18	10.1	26.4	8.8	9.8	10.7	Unique	54.14	High	0	4.374e-05
FALSE	High	LPDYKPYPMYPATTSLVNVVPK	3xTMT6plex [N-Term; K5; K22]	7.45207e-07	0	1	2	1	Q00535	0	3180.8	High	Not Found	High	High	High	High	High	High	High	252.1		287.6	173.9	183.1	357.6	213.1	139.2	172.4	Unique	54.57	High	0	8.552e-07
FALSE	High	SPESDWSSWEAEGSWEQGWQEPSSQEPPPDGTR	1xTMT6plex [N-Term]	4.6602e-07	0	1	7	1	Q96KG9	0	3974.72	High	Not Found	High	High	High	High	High	High	High	3.3		8.9	2.5	2.3	6.5	7.4	3.3	5.9	Unique	55.52	High	0	5.407e-07
FALSE	High	KEGDLPPLWWYIVTRPR	2xTMT6plex [N-Term; K1]	2.59781e-06	0	1	2	1	Q9Y6M9	1	2584.48	High	Not Found	High	High	High	High	High	High	High	35.1		39.9	31.3	52.2	46.5	60.8	32.7	33.4	Unique	34.36	High	0	2.909e-06
FALSE	High	NGIAGSSLPPPPIK	2xTMT6plex [N-Term; K14]; 1xDeamidated [N1]	2.02731e-06	0	1	2	2	Q9Y5A9	0	1807.07	High	High	High	High	High	High	High	High	High	131.6	5.7	44.5	108	111.3	48.5	154.9	95.1	51.4	Unique	58.59	High	0	2.27e-06
FALSE	High	WVSIFSPEGK	2xTMT6plex [N-Term; K10]	0.000128491	0	1	5	1	O75382	0	1607.92	High	High	High	High	High	High	High	High	High	134.4	1.1	90.4	74.4	96.8	97.2	133.7	86.2	80.9	Unique	54.68	High	0	0.000131
FALSE	High	GLFDDEDEESDLFTEASQDR	1xTMT6plex [N-Term]	1.07074e-08	0	1	9	1	A0A096LPC5	0	2547.12	High	High	High	High	High	High	High	High	High	66.5	5.9	46.8	23.2	40.1	68.4	42.9	28.2	40.8	Unique	66.06	High	0	1.376e-08
FALSE	High	SVPTSTVFYPSDGVATEK	2xTMT6plex [N-Term; K18]	3.4778e-08	0	1	3	1	P29401-2	0	2343.25	High	Not Found	High	High	High	High	High	High	High	52.3		75.4	44	44.1	92.2	100.4	68.2	61.1	Unique	66.83	High	0	4.324e-08
FALSE	High	LPAYLTIQMVR	1xTMT6plex [N-Term]	5.01432e-05	0	1	4	2	P54578	0	1533.9	High	High	High	High	High	High	High	High	High	41.2	1.1	18.9	14.9	18.6	44.5	18.7	8.7	12.9	Unique	54.42	High	0	5.195e-05
FALSE	High	SVPTSTVFYPSDGVATEK	3xTMT6plex [N-Term; S1; K18]	8.77651e-05	0	1	3	1	P29401-2	0	2572.41	High	Not Found	High	High	High	High	High	High	High	16.4		5.5	1.9	16.7	31.8	35.3	23.7	17.1	Unique	56.51	High	0	8.954e-05
FALSE	High	NVPLPEFPEHPFQEEHLK	2xTMT6plex [N-Term; K18]	1.28931e-05	0	1	1	1	P14735	0	2645.41	High	High	High	High	High	High	High	High	High	76.8	1.6	36.8	21.9	56.9	94.5	60.7	40.9	53.2	Unique	42.5	High	0	1.382e-05
FALSE	High	GDVVIVLTGWRPGSGFTNTMR	1xTMT6plex [N-Term]	8.89627e-07	0	2	5	1	P14618-2; P14618	0	2492.33	High	High	High	High	High	High	High	High	High	41.7	13	82.7	28.2	36.8	103.6	43.3	30.4	41	NotUnique	48.66	High	0	1.021e-06
FALSE	High	EDLTAVVSVSTK	2xTMT6plex [N-Term; K12]	2.63699e-05	0	1	8	1	Q9UDY2	0	1706.99	High	Not Found	High	High	High	High	High	High	High	45.1		35.6	19.6	22.1	39	21.9	13.1	19.8	Unique	38.23	High	0	2.765e-05
FALSE	High	MTEEEVEMLVAGHEDSNGCINYEELVR	2xTMT6plex [N-Term; S16]; 1xOxidation [M8]; 1xDeamidated [N]; 1xCarbamidomethyl [C19]	5.7126e-06	0	1	5	2	G8JLA2	0	3628.69	High	Not Found	High	High	High	High	High	High	High	18.3		7.1	12.8	19.9	28	15.4	9.6	16.7	Unique	35.21	High	0	6.846e-06
FALSE	High	MTEEEVEMLVAGHEDSNGCINYEELVR	2xTMT6plex [N-Term; S16]; 1xDeamidated [N17]; 1xCarbamidomethyl [C19]	7.25473e-06	0	1	5	1	G8JLA2	0	3612.69	High	High	High	High	High	High	High	High	High										NoQuanValues	33.47	High	0	7.895e-06
FALSE	High	MTEEEVEMLVAGHEDSNGCINYEELVR	2xTMT6plex [N-Term; S16]; 1xCarbamidomethyl [C19]	1.22334e-07	0	1	5	2	G8JLA2	0	3611.71	High	Not Found	High	High	High	High	High	High	High	228.3		123.4	115.7	194.1	271	213.4	135.1	153.5	Unique	50.78	High	0	1.477e-07
FALSE	High	MTEEEVEMLVAGHEDSNGCINYEELVR	1xTMT6plex [N-Term]; 1xOxidation [M8]; 1xDeamidated [N17]; 1xCarbamidomethyl [C19]	3.01937e-07	0	1	5	2	G8JLA2	0	3399.52	High	Not Found	High	High	High	High	High	High	High	10.1		4.4	5.3	10.1	19.3	4.8	1.2	5.7	Unique	62.42	High	0	1.453e-05
FALSE	High	MTEEEVEMLVAGHEDSNGCINYEELVR	1xTMT6plex [N-Term]; 2xDeamidated [N17; N21]; 1xCarbamidomethyl [C19]	3.35797e-07	0	1	5	2	G8JLA2	0	3384.51	High	Not Found	High	High	Not Found	High	Not Found	Not Found	High	1.9		3.2	2.2		2.3			2.3	Unique	75.35	High	0	3.956e-07
FALSE	High	MTEEEVEMLVAGHEDSNGCINYEELVR	1xTMT6plex [N-Term]; 1xDeamidated [N17]; 1xCarbamidomethyl [C19]	2.04019e-13	0	1	5	10	G8JLA2	0	3383.53	High	High	High	High	High	High	High	High	High	228.7	11.4	192.9	161.7	162.1	202.8	183.4	129	132.2	Unique	124.78	High	0	3.438e-13
FALSE	High	VDKGVVPLAGTNGETTTQGLDGLSER	2xTMT6plex [N-Term; K3]	1.28963e-08	0	1	10	3	P04075	1	3072.66	High	Not Found	High	High	High	High	High	High	High	53.1		57.4	60.7	140	135.4	141.8	82.1	78.2	Unique	57.14	High	0	2.148e-07
FALSE	High	TNFFIQLVRPGVAQPEDTVQFR	1xTMT6plex [N-Term]	1.51354e-06	0	1	5	1	A8MYK1	0	2791.51	High	Not Found	High	High	High	High	High	High	High	51.3		14.5	14.3	58.3	32.9	45.5	24.7	27.4	Unique	71.62	High	0	1.704e-06
FALSE	High	TDGALLVNAMFFKPHWDEK	3xTMT6plex [N-Term; K13; K19]	5.97189e-07	0	1	5	4	P50454	0	2906.58	High	High	High	High	High	High	High	High	High	492.9	2.3	112.1	260.4	949.8	225.2	543.5	498.6	270.4	Unique	34.6	High	0	1.605e-05
FALSE	High	TDGALLVNAMFFKPHWDEK	3xTMT6plex [N-Term; K13; K19]; 1xDeamidated [N8]	4.78569e-07	0	1	5	2	P50454	0	2907.57	High	Not Found	High	High	High	High	High	High	High	374.8		67.8	165.5	523.8	132.9	327.5	283.1	164.5	Unique	37.72	High	0	5.555e-07
FALSE	High	LLAGEGPDVLVYSLDFGGHLR	2xTMT6plex [N-Term; S13]	7.97437e-05	0	1	2	1	A0A087X295	0	2686.5	High	Not Found	High	High	High	High	High	High	High	28.2		22.4	12.3	22.2	34.9	29.6	16.7	18.5	Unique	41.58	High	0	8.2e-05
FALSE	High	SGPLFNFDVHDDVR	1xTMT6plex [N-Term]	7.50184e-05	0	1	2	1	Q14320	0	1846.93	High	High	High	High	High	High	High	High	High	144.3	8.9	104.8	75.4	108.2	82.2	193.3	114.5	85.7	Unique	36.42	High	0	7.681e-05
FALSE	High	SQEATEAAPSCVGDMADTPR	1xTMT6plex [N-Term]; 1xCarbamidomethyl [C11]	1.48523e-05	0	1	7	1	Q9UHD8	0	2322.05	High	High	High	High	High	High	High	High	High	63.9	1	28.7	35.3	48.1	62.2	27.7	22.1	27.3	Unique	53.08	High	0	1.58e-05
FALSE	High	ILSSFTDKELLAYAK	3xTMT6plex [N-Term; K8; K15]	0.000128491	0	1	2	1	P08183	1	2386.42	High	Not Found	High	High	High	High	High	High	High	93.8		111.9	35.3	49	160.8	58.1	42.3	102.4	Unique	20.85	High	0	0.0001312
FALSE	High	LLMTEVAWTK	2xTMT6plex [N-Term; K10]	1.86886e-05	0	1	2	1	P14735	0	1649.97	High	Not Found	High	High	High	High	High	High	High	46.6		27.4	20.1	16.7	34.4	16.9	18.9	26.7	Unique	67.44	High	0	1.976e-05
FALSE	High	LLKDQLSLGNAALQITDVK	3xTMT6plex [N-Term; K3; K19]	1.80363e-11	0	1	2	2	Q9NZQ7	1	2727.66	High	High	High	High	High	High	High	High	High	134.9	2.1	98.4	133.1	209.3	143.6	225.6	129.7	63.2	Unique	113.89	High	0	2.723e-11
FALSE	High	CESISGTLPISYQLLK	2xTMT6plex [N-Term; K16]; 1xCarbamidomethyl [C1]	1.82291e-06	0	2	6	2	P16284; P16284-4	0	2267.27	High	Not Found	High	High	High	High	High	High	High	799.6		153.9	132.5	368.9	194.6	373.8	240.1	90.6	NotUnique	43.01	High	0	2.058e-06
FALSE	High	NITVLFLHSNKLETLPEEMGDMQK	3xTMT6plex [N-Term; K11; K24]	4.08067e-06	0	1	10	1	Q96RT1-8	1	3474.89	High	Not Found	High	High	High	High	High	High	High	7.5		8.5	9.9	20.9	16.7	21.4	15.1	16.4	Unique	16.09	High	0	4.489e-06
FALSE	High	GFGFVTYATVEEVDAAMNARPHK	2xTMT6plex [N-Term; K23]; 1xDeamidated [N18]	3.9899e-05	0	2	7	2	P09651-2; P09651	0	2969.52	High	Not Found	High	High	High	High	High	High	High	43.5		27	48.3	80.7	42.7	428.5	261.7	258.5	NotUnique	34.41	High	0	4.169e-05
FALSE	High	GFGFVTYATVEEVDAAMNARPHK	2xTMT6plex [N-Term; K23]	8.43585e-07	0	2	7	3	P09651-2; P09651	0	2968.54	High	Not Found	High	High	High	High	High	High	High	75.3		54	222.5	274.9	230.4	291.1	187.5	135.1	NotUnique	49.81	High	0	9.643e-07
FALSE	High	AELFTQSCADLDK	2xTMT6plex [N-Term; K13]; 1xCarbamidomethyl [C8]	2.07782e-05	0	2	4	2	Q01082; Q01082-3	0	1956.01	High	Not Found	High	High	High	High	High	High	High	587.9		150.8	151.5	66.3	142.6	86.7	59.1	141.4	NotUnique	38.4	High	0	2.194e-05
FALSE	High	VFEGQTNIETSGLPK	2xTMT6plex [N-Term; K15]	6.29563e-08	0	2	4	1	Q5HYK7; A0A0U1RQE4	0	2078.15	High	Not Found	High	High	High	High	High	High	High	10.7		9.9	7.5	3	8.3	3	1.7	3.2	NotUnique	97.28	High	0	7.683e-08
FALSE	High	SAVLISSKPGCFIAGADINMLAACK	3xTMT6plex [N-Term; K8; K25]; 1xDeamidated [N19]; 2xCarbamidomethyl [C11; C24]	4.82471e-09	0	1	1	1	P40939	0	3282.79	High	Not Found	Not Found	High	High	High	High	High	High	3.7			3.2	6.1	7.9	2.1	2	2.1	Unique	74.48	High	0	6.314e-09
FALSE	High	SAVLISSKPGCFIAGADINMLAACK	3xTMT6plex [N-Term; K8; K25]; 2xCarbamidomethyl [C11; C24]	1.52514e-05	0	1	1	3	P40939	0	3281.8	High	Not Found	High	High	High	High	High	High	High	392.5		195.3	222.5	471.1	364.7	279.8	190.5	288.3	Unique	41.62	High	0	1.622e-05
FALSE	High	MTEEEVEMLVAGHEDSNGCINYEELVR	1xTMT6plex [N-Term]; 1xCarbamidomethyl [C19]	5.70683e-10	0	1	5	6	G8JLA2	0	3382.54	High	High	High	High	High	High	High	High	High	167.6	7.3	146	119.3	125.7	195.7	157.4	90.3	106.6	Unique	126.69	High	0	8.062e-10
FALSE	High	NVVHQLSVTLEDLYNGATR	2xTMT6plex [N-Term; S7]; 1xDeamidated [N15]	1.98807e-05	0	1	2	1	P31689	0	2588.41	High	Not Found	High	High	High	High	High	High	High	57.8		23.9	12.5	26.2	61.6	37.5	34.6	49	Unique	23.81	High	0	2.099e-05
FALSE	High	NVVHQLSVTLEDLYNGATR	1xTMT6plex [N-Term]	4.30158e-08	0	1	2	1	P31689	0	2358.26	High	High	High	High	High	High	High	High	High	92.3	5.6	69.9	43.3	40.5	99.2	67.2	68.5	80.9	Unique	76.28	High	0	5.329e-08
FALSE	High	IPLPVSNILWEHCIR	1xTMT6plex [N-Term]; 1xCarbamidomethyl [C13]	5.51432e-07	0	1	3	1	Q96JG6	0	2076.16	High	High	High	High	High	High	High	High	High	44.8	2.7	30.1	42.5	40.4	33.4	40.3	37.3	31.9	Unique	60.63	High	0	6.369e-07
FALSE	High	ELFLTHGNLEEVAEK	2xTMT6plex [N-Term; K15]	2.56811e-05	0	1	1	1	Q68CZ6	0	2187.21	High	Not Found	High	High	High	High	High	High	High	42.9		27.2	26.4	28	32.4	36.1	21.5	20.3	Unique	37.05	High	0	2.698e-05
FALSE	High	KPSVLYLPLTSPTAQMEAYVAEPR	2xTMT6plex [N-Term; K1]	5.51236e-08	0	1	5	1	A0A0J9YY34	0	3119.72	High	Not Found	High	High	High	High	High	High	High	46.6		31.3	30.5	54.1	37.9	59.6	36.4	17.7	Unique	43.63	High	0	6.768e-08
FALSE	High	CLREEIHKDLLVTGAYEISDQSGGAGGLR	2xTMT6plex [N-Term; K8]; 1xDeamidated [Q21]; 1xCarbamidomethyl [C1]	1.22269e-05	0	1	2	1	P49755	2	3603.88	High	Not Found	High	High	High	High	High	High	High	16.1		12.6	12.8	52.1	24.1	56.7	22.7	18.2	Unique	39.93	High	0	1.317e-05
FALSE	High	DNLTLWTSDTQGDEAEAGEGGEN	1xTMT6plex [N-Term]; 1xDeamidated [N2]	1.04273e-05	0	1	5	1	P63104	0	2639.14	High	Not Found	High	High	High	High	High	High	High	2.9		3.6	3.5	3.1	8	6.7	2.8	1.2	Unique	53.19	High	0	1.126e-05
FALSE	High	DNLTLWTSDTQGDEAEAGEGGEN	1xTMT6plex [N-Term]	2.00666e-10	0	1	5	2	P63104	0	2638.16	High	High	High	High	High	High	High	High	High	131.3	5.1	113	46.4	66.7	148.7	60	43.8	62	Unique	102.21	High	0	2.84e-10
FALSE	High	QALDKLNGFQLENFTLK	3xTMT6plex [N-Term; K5; K17]; 1xDeamidated [N/Q]	2.64423e-06	0	1	1	4	O00425	1	2667.53	High	Not Found	High	High	High	High	High	High	High	163.4		251.7	170.5	452.6	340.8	471.6	302.9	259.7	Unique	61.62	High	0	2.955e-06
FALSE	High	QALDKLNGFQLENFTLK	3xTMT6plex [N-Term; K5; K17]	7.12744e-06	0	1	1	1	O00425	1	2666.55	High	Not Found	High	High	High	High	High	High	High	37.2		44.2	31.6	120.4	85.3	135.8	68.4	54.2	Unique	40.75	High	0	7.782e-06
FALSE	High	TWNDPSVQQDIKFLPFKVVEK	4xTMT6plex [N-Term; K12; K17; K21]	0.000122013	0	1	1	1	P11021	2	3434.99	High	Not Found	High	High	High	High	High	High	High	21.1		13.9	15.3	144.4	39.7	81.8	30.5	9.4	Unique	22.09	High	0	0.000124
FALSE	High	SADWVSDWSSRPENIPPK	2xTMT6plex [N-Term; K18]; 1xDeamidated [N14]	0.000135301	0	1	3	1	O60238	0	2530.3	High	Not Found	High	High	High	High	High	High	High	28		15.7	10.3	8.8	21.8	10.1	9.2	15.4	Unique	31.23	High	0	0.0001374
FALSE	High	AGLLPSGPRPGYAAIQALLSSR	1xTMT6plex [N-Term]	8.663e-07	0	1	14	2	P22570-7	0	2424.39	High	High	High	High	High	High	High	High	High	63.8	3.6	61.4	66.9	110.1	111.5	74	48.6	73.2	Unique	67.67	High	0	8.757e-06
FALSE	High	VLELVSITANK	2xTMT6plex [N-Term; K11]	2.09625e-05	0	1	4	3	P34897	0	1645.03	High	Not Found	High	High	High	High	High	High	High	728.6		375.4	421.1	700.7	615.2	791.3	454.4	603.6	Unique	65.66	High	0	2.22e-05
FALSE	High	VDKGVVPLAGTDGETTTQGLDGLSER	2xTMT6plex [N-Term; K3]	2.90876e-12	0	1	6	1	P09972	1	3073.64	High	Not Found	High	High	High	High	High	High	High										NoQuanValues	124	High	0	4.579e-12
FALSE	High	NVVHQLSVTLEDLYNGATR	1xTMT6plex [N-Term]; 1xDeamidated [N15]	7.72082e-07	0	1	2	2	P31689	0	2359.25	High	High	High	High	High	High	High	High	High	113.9	4.5	93	59.1	49.3	101.8	70.7	73.6	92.5	Unique	73.06	High	0	8.9e-07
FALSE	High	MSATFIGNSTAIQELFKR	2xTMT6plex [N-Term; K17]	2.08061e-08	0	2	3	1	Q13885; P68371	1	2472.37	High	Not Found	High	High	High	High	High	High	High	48.4		37.1	28	50.9	121.3	99	41.6	37.5	NotUnique	53.51	High	0	2.616e-08
FALSE	High	AQWGSNMQVTLIPTHDSEVMR	2xTMT6plex [N-Term; S/T]	3.04671e-06	0	1	1	2	P46821	0	2858.47	High	Not Found	High	High	High	High	High	High	High	180.2		106.8	97.7	98.4	98.1	131.3	99.6	72.1	Unique	45.66	High	0	3.397e-06
FALSE	High	ALWADSGIQNAYDR	1xTMT6plex [N-Term]	1.12e-06	0	1	2	1	Q14344	0	1808.91	High	High	High	High	High	High	High	High	High	96.9	10.9	68.1	54.2	59	71.4	57.2	40.1	60.2	Unique	90.48	High	0	1.272e-06
FALSE	High	GAHGIIVVYDVTDQESYANVK	2xTMT6plex [N-Term; K21]	1.09028e-07	0	1	1	2	Q9H0U4	0	2736.46	High	High	High	High	High	High	High	High	High	71.4	1.6	46	44.2	71.8	54.3	64.7	44.3	47.7	Unique	96.29	High	0	1.318e-07
FALSE	High	VESEIKVPDVELK	3xTMT6plex [N-Term; K6; K13]	5.82077e-05	0	1	1	1	Q09666	1	2172.31	High	Not Found	High	High	High	High	High	High	High	302.7		234.8	188.6	254.5	305.3	287.8	203.4	226.5	Unique	36.66	High	0	6.022e-05
FALSE	High	GQSLGYAFAEFQEHEHALK	2xTMT6plex [N-Term; K19]	1.47215e-05	0	1	2	1	Q9NW13	0	2620.36	High	High	High	High	High	High	High	High	High	93.2	1.3	20.2	89.4	61.1	47.3	70.5	60.7	50.8	Unique	29.15	High	0	1.567e-05
FALSE	High	AQLVAGDDEEAGWTELAEQEVAR	1xTMT6plex [N-Term]	0.000117871	0	1	1	1	Q86YV9	0	2716.33	High	Not Found	High	High	High	High	High	High	High	24.2		17.3	13.4	17.3	21.3	24	14.2	16	Unique	45.27	High	0	0.0001202
FALSE	High	RGWDENVYYTVPLVR	1xTMT6plex [N-Term]	2.76394e-06	0	1	1	1	Q9BPW8	1	2096.11	High	High	High	High	High	High	High	High	High	26.1	1.6	13	15.1	22.9	20.4	16.7	8.5	9.8	Unique	69.84	High	0	3.09e-06
FALSE	High	SLIIDEGEDDLGR	1xTMT6plex [N-Term]	7.44992e-06	0	1	3	1	O14618	0	1660.86	High	High	High	High	High	High	High	High	High	36.7	2.2	41.4	15.7	22.5	46.6	23.8	14.3	19.7	Unique	80.12	High	0	8.083e-06
FALSE	High	YLNIFGESQPNPK	2xTMT6plex [N-Term; K13]	1.19067e-05	0	1	3	2	Q9UJS0-2	0	1965.08	High	High	High	High	High	High	High	High	High	688.7	3.1	258.5	298.2	470.5	462.1	393.2	223.6	300.3	Unique	44.4	High	0	1.282e-05
FALSE	High	YFLQGMGYMPSASMTR	1xTMT6plex [N-Term]	8.47607e-05	0	1	8	1	Q9ULP0-6	0	2068.99	High	Not Found	High	High	High	High	High	High	High	18.4		29.2	8.2	10.6	35.1	14	6.3	18.4	Unique	27.58	High	0	8.706e-05
FALSE	High	AAALATVNAWAEQTGMK	2xTMT6plex [N-Term; K17]	7.85618e-06	0	1	3	1	Q14008	0	2191.19	High	Not Found	High	High	High	High	High	High	High	383.5		97	144.3	88	97	118.7	103	108.1	Unique	53.36	High	0	8.506e-06
FALSE	High	GLFDDEDEESDLFTEAPQDR	1xTMT6plex [N-Term]	9.8883e-06	0	1	5	1	Q641Q2	0	2557.14	High	High	High	High	High	High	High	High	High	107.8	16.6	99.2	48.3	75.7	99.8	76.8	48.9	59.6	Unique	51.38	High	0	1.071e-05
FALSE	High	VFPPDEIEQVSNKDDMK	3xTMT6plex [N-Term; K13; K17]	0.000115851	0	1	3	1	Q9NZJ7	1	2678.43	High	Not Found	High	High	High	High	High	High	High	56.2		32.4	35.7	36.2	49.4	30.4	18	37.5	Unique	43.07	High	0	0.0001183
FALSE	High	ESAFTSPISVTKPVVLASGAALSSPK	3xTMT6plex [N-Term; K12; K26]	2.33053e-05	0	1	1	1	Q9HC44	0	3231.88	High	Not Found	Not Found	High	Not Found	High	High	High	Not Found	3.1			1.6		1.4	2.5	6.7		Unique	52.28	High	0	2.453e-05
FALSE	High	TIPLTDNTVIEEHLGK	2xTMT6plex [N-Term; K16]	2.90564e-05	0	1	1	1	Q6DKI1	0	2238.27	High	Not Found	High	High	High	High	High	High	High	101.8		10.9	54.1	36	47.6	49.6	36.1	36.7	Unique	60.26	High	0	3.055e-05
FALSE	High	FLESGGQDGAGDDDDLEDLEEAEEPDMEEDDDQK	2xTMT6plex [N-Term; K34]; 1xOxidation [M27]; 1xDeamidated [Q7]	4.82654e-08	0	2	3	1	H7BZ94; P07237	0	4232.75	High	Not Found	High	High	High	High	High	High	High										NoQuanValues	63.24	High	0	5.953e-08
FALSE	High	FLESGGQDGAGDDDDLEDLEEAEEPDMEEDDDQK	2xTMT6plex [N-Term; K34]; 1xOxidation [M27]	1.90496e-07	0	2	3	2	H7BZ94; P07237	0	4231.77	High	Not Found	High	High	High	High	High	High	High	41.8		12.4	10.9	19.2	9.4	20.3	8.6	5.3	NotUnique	100.65	High	0	2.269e-07
FALSE	High	FLESGGQDGAGDDDDLEDLEEAEEPDMEEDDDQK	2xTMT6plex [N-Term; K34]	6.69834e-08	0	2	3	1	H7BZ94; P07237	0	4215.77	High	Not Found	Not Found	Not Found	High	High	Not Found	Not Found	Not Found	6.9				1.8	1.7				NotUnique	100.15	High	0	8.205e-08
FALSE	High	SEDEVGSLIEYEFR	1xTMT6plex [N-Term]	1.36053e-07	0	2	9	2	P23229-6; P23229	0	1901.93	High	Not Found	High	High	High	High	High	High	High	70.2		20.4	27.6	45.5	16.8	69.6	43.3	20.2	NotUnique	93.29	High	0	1.641e-07
FALSE	High	SWKEPCQVQSCQEEMISLGDGDIR	2xTMT6plex [N-Term; K3]; 1xDeamidated [Q]; 2xCarbamidomethyl [C6; C11]	1.24521e-07	0	1	4	3	Q15003	1	3311.57	High	Not Found	High	High	High	High	High	High	High	7.5		1.5	3.3	7	2.9	9.3	1.9	1.8	Unique	102.38	High	0	1.692e-07
FALSE	High	ILMVGLDAAGK	2xTMT6plex [N-Term; K11]	9.62931e-06	0	3	12	3	P61204; P18085; P84085	0	1545.94	High	Not Found	High	High	High	High	High	High	High	641.1		293.1	272.9	248.1	375	331.8	205.1	230	NotUnique	73.82	High	0	1.038e-05
FALSE	High	VVLAGGVAPALFR	1xTMT6plex [N-Term]	1.08029e-05	0	1	3	2	Q86UX7	0	1498.93	High	High	High	High	High	High	High	High	High	276.9	18.3	185.3	141.8	170.2	211.1	148	101.4	98.5	Unique	70.85	High	0	1.915e-05
FALSE	High	CAQAAEVAATVPGAGVGNVGLRPPMVPR	1xTMT6plex [N-Term]; 1xCarbamidomethyl [C1]	2.3974e-08	0	1	1	1	Q7L5N7	0	2974.59	High	Not Found	High	High	High	High	High	High	High	47		18	16.3	23.3	36.6	21.8	18.3	29.1	Unique	72.98	High	0	3.001e-08
FALSE	High	CAQAAEVAATVPGAGVGNVGLRPPMVPR	1xTMT6plex [N-Term]; 1xDeamidated [N18]; 1xCarbamidomethyl [C1]	1.12961e-07	0	1	1	1	Q7L5N7	0	2975.58	High	Not Found	High	High	High	High	High	High	High	42		25.7	16.7	21.2	40.4	24.6	20.4	20.4	Unique	68.27	High	0	1.36e-07
FALSE	High	MNVDQAFHELVR	1xTMT6plex [N-Term]	1.20125e-05	0	1	5	1	P62070-4	0	1687.88	High	High	High	High	High	High	High	High	High	107.5	3.1	76.9	53	61.4	90.2	75.6	54.7	68.1	Unique	72.24	High	0	1.291e-05
FALSE	High	TFVSGACDASSK	2xTMT6plex [N-Term; K12]; 1xCarbamidomethyl [C7]	6.82042e-07	0	1	2	3	Q9HAV0	0	1687.87	High	Not Found	High	High	High	High	High	High	High	274.5		84.2	103.6	153.2	146	142.2	108.8	115.3	Unique	75.73	High	0	7.842e-07
FALSE	High	GSLLGDFLTAYHGLEKPR	2xTMT6plex [N-Term; K16]	2.195e-07	0	1	1	1	Q9BRZ2	0	2432.37	High	High	High	High	High	High	High	High	High	144.7	6.6	130.8	122.1	115.1	155.1	148.1	115.4	132	Unique	48.19	High	0	2.6e-07
FALSE	High	GEALAAYLDGREPVLR	1xTMT6plex [N-Term]	5.14813e-05	0	1	1	1	Q5U651	1	1959.09	High	High	High	High	High	High	High	High	High	35.1	12.2	52.6	47.9	67.8	66.6	76.1	46.2	42.9	Unique	42.47	High	0	5.351e-05
FALSE	High	VKAEGILDVFQTVK	3xTMT6plex [N-Term; K2; K14]	1.79043e-07	0	1	2	1	P18433	1	2234.37	High	Not Found	High	High	High	High	High	High	High	210.3		148.8	216.9	365.6	174.9	377.3	245	114.6	Unique	68.94	High	0	2.143e-07
FALSE	High	SVLEDSALVLQYHAR	1xTMT6plex [N-Term]	3.25842e-05	0	1	1	1	Q9NXH8	0	1930.06	High	High	High	High	High	High	High	High	High	82.4	3.5	9.6	23.6	50.2	8.5	42.7	13.5	1.3	Unique	50.2	High	0	3.426e-05
FALSE	High	EILLEMIHSIQNSQDMR	1xTMT6plex [N-Term]	7.38383e-08	0	1	2	1	O95816	0	2286.18	High	High	High	High	High	High	High	High	High	107.9	1.6	46	52.4	28	44.4	23.8	19.1	34.5	Unique	58.6	High	0	9.026e-08
FALSE	High	KLYAVGDNPMSDVYGANLFHQYLQK	3xTMT6plex [N-Term; K1; K25]	5.12747e-12	0	1	2	1	Q9BXW7	1	3558.9	High	Not Found	High	High	High	High	High	High	High	70.9		55.1	63.5	85.3	74.1	78.8	42.3	55.4	Unique	84.58	High	0	7.938e-12
FALSE	High	LIEVNGQNVEGLR	1xTMT6plex [N-Term]	3.12826e-07	0	2	6	1	Q15599; Q15599-3	0	1669.94	High	Not Found	High	High	High	High	High	High	High	30		19.3	19.1	21.2	33.1	34.2	19.9	33.8	NotUnique	98.34	High	0	3.675e-07
FALSE	High	NSLGGFASTQDTTVALK	2xTMT6plex [N-Term; K17]	3.2978e-08	0	1	3	1	Q6YHK3	0	2168.2	High	Not Found	High	High	High	High	High	High	High	344.2		44.4	63.8	196.1	55.7	143.9	114.5	19.8	Unique	65.55	High	0	4.104e-08
FALSE	High	AIPNQGEILVIR	1xTMT6plex [N-Term]	5.19351e-05	0	2	3	1	P50570; P50570-4	0	1551.94	High	High	High	High	High	High	High	High	High	16	1.9	12.6	11.8	7.8	12.9	9	10.4	8.5	NotUnique	54.31	High	0	5.387e-05
FALSE	High	RDNYVPEVSALDQEIIEVDPDTK	2xTMT6plex [N-Term; K23]	3.12873e-06	0	1	3	2	P08708	1	3103.62	High	Not Found	High	High	High	High	High	High	High	240.9		94.6	104.5	136.5	110.7	182.4	118.9	108.8	Unique	38.71	High	0	1.554e-05
FALSE	High	FFTDNVPALVQGFHAAPQDVKPNYLK	3xTMT6plex [N-Term; K21; K26]	0.000135301	0	1	5	1	Q96T76-8	0	3603.99	High	Not Found	High	High	High	High	High	High	High	37.9		18.7	35.5	58.7	36.3	35	37	35.8	Unique	38	High	0	0.000137
FALSE	High	YGIVDYMIEQSGPPSK	2xTMT6plex [N-Term; K16]	5.76339e-06	0	1	1	4	P13667	0	2242.18	High	Not Found	High	High	High	High	High	High	High	792.1		227.7	289.4	441.6	284.9	444.9	252	201.7	Unique	44.87	High	0	7.84e-05
FALSE	High	LFLSYDYAVK	2xTMT6plex [N-Term; K10]	9.16675e-05	0	1	2	2	Q9UHG3	0	1676.97	High	Not Found	High	High	High	High	High	High	High	476.1		175.3	244.1	264.2	176.7	231.8	150.9	111.2	Unique	62.11	High	0	9.377e-05
FALSE	High	ENVLIGDGAGFK	2xTMT6plex [N-Term; K12]	0.000141241	0	1	4	1	Q5T4U5	0	1677.96	High	Not Found	High	High	High	High	High	High	High	205.4		120.8	96	176.4	191.4	163.9	113.2	172.9	Unique	39.56	High	0	0.0001435
FALSE	High	GYTLVEYETYK	2xTMT6plex [N-Term; K11]	1.48697e-06	0	1	3	1	Q9Y5S9	0	1823.98	High	High	High	High	High	High	High	High	High	180.8	0.6	77.6	128.5	82.4	134	95.8	69.4	89.7	Unique	82.06	High	0	1.683e-06
FALSE	High	ILSLFNSGTVTANSSSASPSVAAGNTPNQNFSTAANSQPQQR	1xTMT6plex [N-Term]; 1xDeamidated [N25]	9.40899e-05	0	1	1	1	Q9HCD5	0	4452.19	Not Found	Not Found	Not Found	Not Found	Not Found	Not Found	Not Found	Not Found	Not Found										NoQuanValues	51.07	High	0	9.6e-05
FALSE	High	IWNVIYEENCFKPQTIK	3xTMT6plex [N-Term; K12; K17]; 1xCarbamidomethyl [C10]	3.06347e-05	0	1	2	1	Q96HE7	0	2869.59	High	Not Found	High	High	High	High	High	High	High	255.9		50.9	145.5	259.4	92.7	198.4	131.8	85	Unique	32.12	High	0	3.212e-05
FALSE	High	ATSETLAADPTPAATIVHFK	2xTMT6plex [N-Term; K20]	7.85618e-06	0	1	5	1	Q9HBL0	0	2499.39	High	High	High	High	High	High	High	High	High	115.2	2.6	77.4	70.1	59.3	87	57.6	44.5	62.7	Unique	49.48	High	0	8.533e-06
FALSE	High	YVLDDQYVSSVGTK	2xTMT6plex [N-Term; K14]	5.22705e-08	0	1	1	1	P51813	0	2032.1	High	Not Found	High	High	High	High	High	High	High	10.4		5.9	7.8	6.8	14.1	9.8	5.1	7.7	Unique	103.69	High	0	6.431e-08
FALSE	High	SLSRPTTETQFSNMGMEDVPLATSK	2xTMT6plex [N-Term; K25]	1.6537e-06	0	1	2	1	Q86XZ4	0	3185.62	High	Not Found	High	High	High	High	High	High	High	154.1		54.1	54.3	124.9	81	143.2	90.5	58.6	Unique	75.51	High	0	1.866e-06
FALSE	High	LLQVASPFLEPHLVR	1xTMT6plex [N-Term]	2.7803e-05	0	1	3	1	O75694	0	1948.16	High	Not Found	High	High	High	High	High	High	High	37.1		11.7	18.2	20	12.8	22.8	16	8.1	Unique	19.03	High	0	2.915e-05
FALSE	High	LLTQDEGPALVPGGR	1xTMT6plex [N-Term]	1.19163e-06	0	1	1	1	Q5T440	0	1751.99	High	Not Found	High	High	High	High	High	High	High	21.9		14.9	9.5	16.6	20.2	21.2	10.3	11.6	Unique	80.58	High	0	1.35e-06
FALSE	High	AICTEAGLMALR	1xTMT6plex [N-Term]; 1xCarbamidomethyl [C3]	6.1318e-06	0	1	2	1	P62191	0	1534.83	High	High	High	High	High	High	High	High	High	43.5	6.7	22.3	20.6	14.6	38.9	15.5	13	16.1	Unique	69.77	High	0	6.683e-06
FALSE	High	AQWGSNMQVTLIPTHDSEVMR	1xTMT6plex [N-Term]	2.8875e-08	0	1	1	2	P46821	0	2629.31	High	High	High	High	High	High	High	High	High	81.1	64.9	89	80.8	48.2	48.7	65.1	57.9	45.3	Unique	64.18	High	0	1.351e-05
FALSE	High	SGDLYVLAADK	2xTMT6plex [N-Term; K11]	1.69578e-05	0	1	1	1	Q9NSE4	0	1609.92	High	Not Found	High	High	High	High	High	High	High	221.6		89.4	67.3	136.3	140.8	104.9	63.2	121.7	Unique	67.72	High	0	1.801e-05
FALSE	High	EFQLDLDEIENDNGTVR	1xTMT6plex [N-Term]; 1xDeamidated [N]	5.56289e-06	0	1	5	2	Q14008	0	2237.08	High	Not Found	Not Found	High	Not Found	Not Found	High	Not Found	High	2.8			1.6			1.3		1.6	Unique	66.49	High	0	6.071e-06
FALSE	High	EFQLDLDEIENDNGTVR	1xTMT6plex [N-Term]	0.000111912	0	1	5	1	Q14008	0	2236.09	High	Not Found	High	High	High	High	High	High	High	22.2		9.6	14.3	14.1	15.5	17.4	13.8	9.8	Unique	41.04	High	0	0.0001141
FALSE	High	EVSQVDTICECLLEHEEQVLR	1xTMT6plex [N-Term]; 2xCarbamidomethyl [C9; C11]	9.89066e-08	0	1	1	1	Q8WUM0	0	2815.38	High	Not Found	High	High	High	High	High	High	Not Found	3.2		1.4	2.3	7.9	1.9	1.7	3.1		Unique	58.72	High	0	1.196e-07
FALSE	High	IVSRPEELREDDVGTGAGLLEIK	2xTMT6plex [N-Term; K23]	3.66897e-07	0	1	3	1	P49368	1	2954.66	High	Not Found	High	High	High	High	High	High	High	178.3		132.4	80.6	76.8	168.7	89.5	65.2	93.7	Unique	43.44	High	0	4.295e-07
FALSE	High	TDIQIALPSGCYGR	1xTMT6plex [N-Term]; 1xCarbamidomethyl [C11]	3.44881e-06	0	1	9	1	P33316	0	1779.93	High	High	High	High	High	High	High	High	High	144.5	2.3	36.7	52.3	87.9	87.9	78.4	56.8	80.5	Unique	54.41	High	0	3.835e-06
FALSE	High	KANLQIDQINTDLNLER	2xTMT6plex [N-Term; K1]	3.12711e-08	0	1	2	4	P35579	1	2456.39	High	Not Found	High	High	High	High	High	High	High	577.6		555.3	440.1	501.4	678.7	537.7	306.3	406.1	Unique	95.62	High	0	3.889e-08
FALSE	High	EGGFLLLHTLLR	1xTMT6plex [N-Term]	1.43363e-05	0	1	2	1	P49327	0	1597.96	High	High	High	High	High	High	High	High	High	177.3	1	21.2	47.4	31.1	46.9	39.2	37.3	31.1	Unique	56.99	High	0	1.528e-05
FALSE	High	TETGQELECLQDHLDDLVVECR	1xTMT6plex [N-Term]; 2xCarbamidomethyl [C9; C21]	1.75834e-08	0	1	4	2	Q92896-2	0	2888.36	High	High	High	High	High	High	High	High	High	367.5	3.8	19.6	84.7	168	32.5	136.3	93.5	37.8	Unique	92.25	High	0	2.22e-08
FALSE	High	KANLQIDQINTDLNLER	2xTMT6plex [N-Term; K1]; 1xDeamidated [N/Q]	3.73318e-08	0	1	2	7	P35579	1	2457.37	High	High	High	High	High	High	High	High	High	381.4	8.5	381.4	326	345.5	491	346	234.2	291	Unique	87.1	High	0	6.33e-05
FALSE	High	AAAPQAWAGPMEEPPQAQAPPR	1xTMT6plex [N-Term]	6.87349e-10	0	1	4	2	Q16643-3	0	2500.26	High	High	High	High	High	High	High	High	High	138.5	13.1	96.7	47.2	75.8	100.3	36.8	26	36	Unique	73.63	High	0	9.426e-10
FALSE	High	GVMGGQSAGPQHTEAETIQK	2xTMT6plex [N-Term; K20]	7.58525e-07	0	1	2	2	O60763	0	2484.29	High	High	High	High	High	High	High	High	High	195.2	5.6	110.7	100.5	86.3	180.2	125.4	82.3	117.4	Unique	73.52	High	0	8.704e-07
FALSE	High	QELAVFCSPEPPAK	2xTMT6plex [N-Term; K14]; 1xCarbamidomethyl [C7]	1.07074e-08	0	1	1	1	Q9Y490	0	2031.1	High	Not Found	High	High	High	High	High	High	High	146.9		68.7	73	76.6	86.1	52.3	35.5	52.3	Unique	86.43	High	0	1.377e-08
FALSE	High	GHQLLDPYLTVSVDQVR	1xTMT6plex [N-Term]	1.0157e-07	0	1	2	1	P24723	0	2169.19	High	High	High	High	High	High	High	High	High	68.4	14.2	77.9	48.6	54	102.4	62.2	39.5	79	Unique	74.1	High	0	1.23e-07
FALSE	High	LFSSEQQASILHVLNTASTK	2xTMT6plex [N-Term; K20]	4.84124e-05	0	1	3	1	Q96QE5	0	2632.47	High	Not Found	High	High	High	High	High	High	High	8.2		6.4	6.7	2.4	2.5	3.2	2.4	6.4	Unique	58.03	High	0	5.039e-05
FALSE	High	EGMLQHWELGQALR	1xTMT6plex [N-Term]	6.0242e-06	0	1	8	1	P11117	0	1897	High	High	High	High	High	High	High	High	High	252.8	9.1	67.9	109.3	199.1	96.6	147	78.3	52.2	Unique	53.95	High	0	6.568e-06
FALSE	High	SYEFFNELYHR	1xTMT6plex [N-Term]	3.43529e-05	0	1	1	2	O75165	0	1733.85	High	High	High	High	High	High	High	High	High	187.3	10.6	93	77.2	90	108.6	91.8	54.8	83.6	Unique	47.2	High	0	3.593e-05
FALSE	High	SSGAASSAPGGGDGAEYK	2xTMT6plex [N-Term; K18]	1.09957e-05	0	1	5	1	Q96T37	0	2027.01	High	Not Found	High	High	High	High	High	High	High	20.5		2.2	15.6	10.9	20.4	16.8	14.4	12.1	Unique	27.08	High	0	1.187e-05
FALSE	High	FKDIFQEIYDK	3xTMT6plex [N-Term; K2; K11]	2.85484e-05	0	1	1	1	O75874	1	2133.22	High	Not Found	High	High	High	High	High	High	High	280.4		286	134.8	195.5	574.7	178.4	141.6	214	Unique	32.65	High	0	2.987e-05
FALSE	High	AKDDSELEGQVISCLK	3xTMT6plex [N-Term; K2; K16]; 1xCarbamidomethyl [C14]	3.32714e-08	0	1	3	1	Q92896-2	1	2479.37	High	High	High	High	High	High	High	High	High	493.2	0.2	54.3	216.9	360.9	72	329.8	163	65.5	Unique	78.65	High	0	4.126e-08
FALSE	High	RLQQQQQQQQLAQMK	2xTMT6plex [N-Term; K15]	1.61034e-06	0	1	5	1	Q6Y7W6	1	2342.31	High	Not Found	High	High	High	High	High	High	High	70.8		26.7	32.4	64.5	43.8	81.1	55.9	40.8	Unique	48.92	High	0	1.824e-06
FALSE	High	LIEEVHAVVTVR	1xTMT6plex [N-Term]	1.97416e-06	0	1	6	1	M0QYZ2	0	1593.95	High	High	High	High	High	High	High	High	High	226.7	17.4	156.8	136.8	138.3	144	151.6	103.2	108.1	Unique	66.29	High	0	2.224e-06
FALSE	High	CPFYAAEQDKGALEGSSCPFR	2xTMT6plex [N-Term; K10]; 2xCarbamidomethyl [C1; C18]	9.54449e-06	0	2	3	1	A0A087WT44; P30519-2	1	2848.38	High	Not Found	High	High	High	High	High	High	High	25.6		16.5	17.3	57.1	39.5	52.7	34.8	26.7	NotUnique	56.45	High	0	1.027e-05
FALSE	High	SDKLPEEMGLLQGSSGDK	3xTMT6plex [N-Term; K3; K18]	1.16002e-07	0	1	1	2	P43121	1	2578.4	High	High	High	High	High	High	High	High	High	1238.5	3.3	330.4	422.6	669.7	390.1	791	481.1	228.6	Unique	75.59	High	0	1.394e-07
FALSE	High	ELKEVFGDDSEISK	3xTMT6plex [N-Term; K3; K14]	0.000130724	0	1	1	1	O43395	1	2283.27	High	High	High	High	High	High	High	High	High	37.9	10.8	23.7	41.6	37.1	48.5	48.8	29.4	28	Unique	21.4	High	0	0.0001324
FALSE	High	NLEQYNKLDQDLNEVK	3xTMT6plex [N-Term; K7; K16]	0.00010717	0	1	1	1	Q9UQE7	1	2650.47	High	Not Found	High	High	High	High	High	High	High	27		27.6	25.1	53.4	69.5	87.3	45.5	48.4	Unique	28.13	High	0	0.0001089
FALSE	High	SFENSLGINVPR	1xTMT6plex [N-Term]	1.52514e-05	0	1	4	1	Q16851	0	1561.85	High	High	High	High	High	High	High	High	High	76.2	2.9	39.2	26.2	30.5	50.4	35.7	24.5	28	Unique	67.04	High	0	1.632e-05
FALSE	High	FTITPPTAQVVGVLK	2xTMT6plex [N-Term; K15]	6.52373e-06	0	1	1	2	P52907	0	2029.25	High	Not Found	High	High	High	High	High	High	High	673.4		443.6	252.7	373.7	623.9	360.6	268	317.9	Unique	55.4	High	0	7.12e-06
FALSE	High	LLQDHPWLLSQNLVVKPDQLIK	4xTMT6plex [N-Term; S10; K16; K22]	7.97437e-05	0	2	4	1	P53396; P53396-2	0	3514.13	High	Not Found	High	High	High	High	High	High	High	39.8		19	16.5	43.6	50.4	45.5	22.7	24.4	NotUnique	15.93	High	0	8.176e-05
FALSE	High	QIYQTYGFVPSR	1xTMT6plex [N-Term]	3.14556e-05	0	1	1	1	P48723	0	1687.9	High	Not Found	High	High	High	High	High	High	High	45.4		6	17.2	29.6	8.8	37.5	20.6	7.5	Unique	60.41	High	0	3.306e-05
FALSE	High	ELQTVLSTYLRPLQTSEK	2xTMT6plex [N-Term; K18]	3.2125e-07	0	2	9	1	Q14155-2; Q14155-5	0	2564.47	High	Not Found	High	High	High	High	High	High	High	44		50	33.6	31	68.3	32.3	28.3	36.6	NotUnique	52.31	High	0	3.777e-07
FALSE	High	LSLDGQNIYNACCTLR	1xTMT6plex [N-Term]; 2xCarbamidomethyl [C12; C13]	0.000128491	0	1	7	1	A6NLN1	0	2127.05	High	Not Found	High	High	High	High	High	High	High	24.1		13.8	21.1	52.9	25.5	40.3	30.4	13.7	Unique	51.26	High	0	0.0001308
FALSE	High	SSTAVYLAEGGTATTMVSK	2xTMT6plex [N-Term; K19]	1.38381e-05	0	1	1	1	Q13873	0	2332.25	High	Not Found	High	High	High	High	High	High	High	76.4		17.6	43.4	58	11.1	82.2	40.1	12	Unique	40.08	High	0	1.486e-05
FALSE	High	EILTLLQGVHQGAGFQDIPK	2xTMT6plex [N-Term; K20]	0.000132994	0	1	4	1	Q15631	0	2622.5	High	Not Found	High	High	High	High	High	High	High	190.8		83.1	69.4	55.8	80.1	61	53.8	58.7	Unique	44.74	High	0	0.0001352
FALSE	High	YGISSMIQSQEKPDR	2xTMT6plex [N-Term; K12]	1.9395e-06	0	1	2	2	P14868	0	2197.17	High	Not Found	High	High	High	High	High	High	High	135.3		81.2	43.4	78.7	96.7	74.5	48.2	72.9	Unique	52.04	High	0	2.184e-06
FALSE	High	ETAPGGTESQSLR	1xTMT6plex [N-Term]	3.83511e-07	0	1	2	1	Q8N392	0	1561.8	High	High	High	High	High	High	High	High	High	105.7	2.6	42	41.2	30.4	62.6	63.1	31.2	28	Unique	86.5	High	0	4.479e-07
FALSE	High	KTENWLSEWWLK	3xTMT6plex [N-Term; K1; K12]	1.21293e-06	0	1	3	2	P43155	1	2307.31	High	Not Found	High	High	High	High	High	High	High	223.1		174.8	134.6	229.8	275.9	169.8	107.2	165.8	Unique	56.34	High	0	1.385e-06
FALSE	High	DILAQSPAAEPLK	2xTMT6plex [N-Term; K13]	4.53808e-06	0	1	2	2	G3XAI2	0	1811.07	High	Not Found	High	High	High	High	High	High	High	630.3		28	160.5	164.4	58.7	180.3	113.6	49.3	Unique	46.46	High	0	4.973e-06
FALSE	High	HTQWGLDLLDR	1xTMT6plex [N-Term]	3.20149e-05	0	1	7	1	Q15642-2	0	1582.85	High	High	High	High	High	High	High	High	High	91.1	1.4	40.7	27.7	48.9	75.7	41.4	38.3	41.8	Unique	53.62	High	0	3.345e-05
FALSE	High	LRECLPLIVFLR	1xTMT6plex [N-Term]; 1xCarbamidomethyl [C4]	9.63445e-07	0	1	3	1	P22090	1	1758.07	High	High	High	High	High	High	High	High	High	45.4	1	25.2	39.2	102.7	28.3	68.1	46.8	29.5	Unique	55.73	High	0	1.101e-06
FALSE	High	VVSLIPAVVSGNCQDLK	2xTMT6plex [N-Term; K17]; 1xCarbamidomethyl [C13]	5.62019e-05	0	1	2	1	Q8N9A8-2	0	2257.3	High	Not Found	High	High	High	High	High	High	High	8.2		5.8	2.1	2.3	7.4	3.1	5.9	3.7	Unique	35.13	High	0	5.836e-05
FALSE	High	FDGSGPYSTLSSPQLGR	1xTMT6plex [N-Term]	6.69834e-08	0	1	3	1	P49184	0	1998.01	High	Not Found	High	High	High	High	High	High	High	78.4		20.2	13.2	26.3	21.5	20.7	10.5	10.3	Unique	63.87	High	0	8.213e-08
FALSE	High	KIDAAQNWLADPNGGPEGEEQIR	2xTMT6plex [N-Term; K1]	3.06753e-12	0	1	2	1	P18206	1	2966.54	High	Not Found	High	High	High	High	High	High	High	528.6		92.6	69.9	26.1	87.8	23.1	16.9	45.1	Unique	105.71	High	0	4.813e-12
FALSE	High	KIDAAQNWLADPNGGPEGEEQIR	2xTMT6plex [N-Term; K1]; 1xDeamidated [N13]	4.11054e-11	0	1	2	1	P18206	1	2967.52	High	Not Found	High	High	High	High	High	High	High	154.9		41.4	28.8	14.1	38.5	7.4	7.2	15.6	Unique	109.07	High	0	6.053e-11
FALSE	High	LSSHEEALSFVSLVDGYFR	1xTMT6plex [N-Term]	1.31357e-06	0	1	1	2	P23458	0	2385.23	High	High	High	High	High	High	High	High	High	25.7	10.3	33.8	40.4	16.6	13.3	19.9	16.2	12.1	Unique	81.8	High	0	1.493e-06
FALSE	High	FTITPSTTQVVGILK	2xTMT6plex [N-Term; K15]	5.65866e-09	0	1	1	1	P47755	0	2063.25	High	Not Found	High	High	High	High	High	High	High	177.5		106.3	63.7	78.3	158.1	78.5	70.4	96.2	Unique	95.27	High	0	7.399e-09
FALSE	High	KENSETVVTGSLDDLVK	3xTMT6plex [N-Term; K1; K17]	5.9149e-09	0	1	4	1	Q9GZS3	1	2521.43	High	Not Found	High	High	High	High	High	High	High	164.1		53.1	82.8	101.6	78	95.6	87.7	80.8	Unique	71.38	High	0	7.698e-09
FALSE	High	DLKPENILLDEEGHIK	3xTMT6plex [N-Term; K3; K16]	4.66023e-06	0	2	14	1	Q15418-2; P51812	0	2550.47	High	Not Found	High	High	High	High	High	High	High	166.5		162.8	91.5	88.5	196.2	90.3	75.2	100.7	NotUnique	40.64	High	0	5.124e-06
FALSE	High	ISLQAIQQLVR	1xTMT6plex [N-Term]	9.54449e-06	0	1	3	1	O75694	0	1497.93	High	Not Found	High	High	High	High	High	High	High	48.7		8.2	16.2	15.9	20.3	21	11.2	17.8	Unique	78.66	High	0	1.033e-05
FALSE	High	YEIMDGAPVKGESIPIR	2xTMT6plex [N-Term; K10]	1.30199e-06	0	1	1	1	O75436	1	2333.29	High	Not Found	High	High	High	High	High	High	High	119.4		164.3	74.4	123.3	204.3	136.3	78	110.7	Unique	38.4	High	0	1.482e-06
FALSE	High	QQSPGLGRPIWLQIAESAYR	1xTMT6plex [N-Term]	9.13147e-06	0	1	2	1	O75746	0	2499.37	High	High	High	High	High	High	High	High	High	11.3	1.1	20.6	10	37.1	24.8	33.5	18.9	18.9	Unique	53.14	High	0	9.894e-06
FALSE	High	GDGVVLVAPPLR	1xTMT6plex [N-Term]	1.00648e-05	0	1	1	1	P62310	0	1421.87	High	High	High	High	High	High	High	High	High	151.2	30.9	122.6	116.1	112.1	168.9	130.9	89.5	108.1	Unique	65.09	High	0	1.081e-05
FALSE	High	VEPLDFGGTQK	2xTMT6plex [N-Term; K11]	2.54555e-05	0	1	4	2	P07686	0	1648.93	High	Not Found	High	High	High	High	High	High	High	422.3		120.3	208.7	280.2	171.5	265.1	198.6	110.3	Unique	63.51	High	0	2.671e-05
FALSE	High	SHMMDVQGSTQDSAIKDFVLK	3xTMT6plex [N-Term; K16; K21]; 1xOxidation [M]	1.29011e-07	0	1	1	4	P13667	1	3040.61	High	High	High	High	High	High	High	High	High	157.9	2	80.5	102.6	166.6	100.7	175.5	93.4	79.8	Unique	46.15	High	0	3.681e-07
FALSE	High	SHMMDVQGSTQDSAIKDFVLK	3xTMT6plex [N-Term; K16; K21]	1.07985e-09	0	1	1	1	P13667	1	3024.61	High	High	High	High	High	High	High	High	High	136.6	0.8	73	104.5	184.7	95.3	158.6	96.2	65.8	Unique	69.71	High	0	1.467e-09
FALSE	High	KENVIFFQQGMLPAMSFDGK	3xTMT6plex [N-Term; K1; K20]	3.3584e-06	0	1	3	1	Q16222	1	2974.61	High	Not Found	High	High	High	High	High	High	High	64.6		32.6	27.2	35.4	50.2	19.4	17	19.1	Unique	94.52	High	0	3.731e-06
FALSE	High	SLKDPNNSLTLWVIDQGLK	3xTMT6plex [N-Term; K3; K19]	2.59087e-05	0	1	3	1	A0A1W2PNX8	1	2828.65	High	Not Found	High	High	High	High	High	High	High	21.8		10.2	8.5	7.8	10.8	10.4	9.5	7.2	Unique	40.96	High	0	2.737e-05
FALSE	High	GDLCAISLVGNR	1xTMT6plex [N-Term]; 1xCarbamidomethyl [C4]	5.76339e-06	0	1	3	1	P41214	0	1503.82	High	High	High	High	High	High	High	High	High	58.3	11.2	33.9	36.8	33.7	40.4	53.7	37.1	34.2	Unique	63.39	High	0	6.302e-06
FALSE	High	SSWVMTCAYAPSGNYVACGGLDNICSIYNLK	2xTMT6plex [N-Term; K31]; 3xCarbamidomethyl [C7; C18; C25]	5.51387e-06	0	2	6	3	Q9HAV0; P62873	0	3929.87	High	Not Found	High	High	High	High	High	High	High	124.2		42.7	64.9	110.1	72.1	70.1	74.9	71.2	NotUnique	42.25	High	0	7.498e-05
FALSE	High	KIWCFGPDGTGPNILTDITK	3xTMT6plex [N-Term; K1; K20]; 1xCarbamidomethyl [C4]	8.42663e-10	0	1	1	4	P13639	1	2920.62	High	High	High	High	High	High	High	High	High	458.1	1.1	250.8	310.6	523.3	390.2	665	372.6	254.7	Unique	103.15	High	0	1.154e-09
FALSE	High	LPPHDPGTPVLSVVDMHTGGEPLR	1xTMT6plex [N-Term]	2.195e-07	0	1	1	1	Q96EM0	0	2750.45	High	High	High	High	High	High	High	High	High	18.4	15.5	12.8	12	8.2	14.7	8.9	3.2	5.8	Unique	37.68	High	0	2.605e-07
FALSE	High	LLTQHENIKNEIDNYEEDYQK	3xTMT6plex [N-Term; K9; K21]	1.51311e-07	0	2	4	2	Q01082; Q01082-3	1	3323.74	High	Not Found	High	High	High	High	High	High	High	257.9		129.5	95.9	110.4	124.5	87.3	51.2	106.9	NotUnique	68.2	High	0	1.808e-07
FALSE	High	APLVCLPVFVSR	1xTMT6plex [N-Term]; 1xCarbamidomethyl [C5]	4.66023e-06	0	1	8	1	A0A1W2PRB8	0	1586.93	High	Not Found	High	High	High	High	High	Not Found	High	6.3		8.2	1.8	2	10.4	2.9		7.2	Unique	82.16	High	0	5.114e-06
FALSE	High	DAASLESQLQDTQELLQEETR	1xTMT6plex [N-Term]	4.86764e-09	0	1	5	2	P35580-3	0	2633.31	High	High	High	High	High	High	High	High	High	76.4	1	40.9	52.8	61.5	77.7	110.2	63.7	55.8	Unique	88.51	High	0	6.377e-09
FALSE	High	YTAVSSFIFLR	1xTMT6plex [N-Term]	6.81433e-05	0	1	2	1	Q14644	0	1532.87	High	Not Found	High	High	High	High	High	High	High	9.9		8.3	9.4	16.7	6.2	13.9	9.9	1.6	Unique	51.93	High	0	7.024e-05
FALSE	High	DVEDEILWVTER	1xTMT6plex [N-Term]	8.18572e-05	0	1	2	1	O15020	0	1732.9	High	Not Found	High	High	High	High	High	High	High	27.6		16.1	15	14.6	20.3	16.7	6.5	13.1	Unique	57.49	High	0	8.378e-05
FALSE	High	AVSLINAIDTGR	1xTMT6plex [N-Term]	2.98352e-05	0	1	3	1	Q9Y6G5	0	1458.85	High	High	High	High	High	High	High	High	High	64.3	7.5	37.9	23	27.5	42.1	34.8	15.1	23.1	Unique	58	High	0	3.125e-05
FALSE	High	ILLTQENPFFR	1xTMT6plex [N-Term]	0.00013647	0	1	3	1	Q08J23	0	1606.92	High	High	High	High	High	High	High	High	High	72.6	2.3	21.9	29.4	41.2	37.6	48.4	25.2	22.2	Unique	56.4	High	0	0.0001381
FALSE	High	VTDECIQIMGGMGFMK	2xTMT6plex [N-Term; K16]; 1xCarbamidomethyl [C5]	0.000128491	0	1	6	1	P49748-3	0	2275.14	High	Not Found	High	High	High	High	High	High	High	53.4		19.1	20.9	32.7	30.2	20.1	19	20	Unique	32.34	High	0	0.0001304
FALSE	High	LSTIALALGVER	1xTMT6plex [N-Term]	8.85323e-05	0	2	9	1	P30154-2; P30153	0	1471.9	High	High	High	High	High	High	High	High	High	239	9.2	120.4	81.9	103.4	191.8	122.8	74.6	95.2	NotUnique	59.94	High	0	9.073e-05
FALSE	High	LSPPSSSAASSYSFSDLNSTR	1xTMT6plex [N-Term]	4.66023e-06	0	1	1	1	P50402	0	2390.17	High	High	High	High	High	High	High	High	High	65.6	2.6	31.6	44.3	49.1	34.8	36.7	24.5	29.9	Unique	49.87	High	0	5.104e-06
FALSE	High	LVTSPQSEPPAPFPPPR	1xTMT6plex [N-Term]	4.97048e-05	0	1	2	1	Q9H792	0	2046.12	High	Not Found	High	High	High	High	High	High	High	429.3		215	191.1	251.5	246.6	353.9	237.1	222	Unique	18.95	High	0	5.143e-05
FALSE	High	LINKLDTEPQWVPSTWLR	2xTMT6plex [N-Term; K4]	7.00166e-08	0	1	2	1	Q8N3R9	1	2654.51	High	Not Found	High	High	High	High	High	High	High	116.1		117.5	94.8	131.2	138.2	140.7	90.4	82.7	Unique	48.33	High	0	8.54e-08
FALSE	High	VLLSEFRPSGELFAIK	2xTMT6plex [N-Term; K16]	0.000126296	0	1	3	2	Q16512-2	0	2264.34	High	Not Found	High	High	High	High	High	High	High	87.3		62	55.3	70.2	94.5	82.2	48.9	46.5	Unique	35.56	High	0	0.0001288
FALSE	High	GTVRPANDFNPDADAK	2xTMT6plex [N-Term; K16]; 1xDeamidated [N7]	1.83913e-06	0	2	3	1	P08133; E5RK69	0	2147.11	High	Not Found	High	High	High	High	High	High	High	204.6		200.6	119.3	154.2	174.5	144.9	57.2	93.2	NotUnique	49.7	High	0	2.069e-06
FALSE	High	GTVRPANDFNPDADAK	2xTMT6plex [N-Term; K16]	3.75152e-05	0	2	3	3	P08133; E5RK69	0	2146.13	High	High	High	High	High	High	High	High	High	358.1	7.1	294.1	160.9	268.1	273	263.8	108.1	155.4	NotUnique	36.44	High	0	3.901e-05
FALSE	High	VANLEANNNGR	1xTMT6plex [N-Term]; 1xDeamidated [N9]	1.1698e-05	0	1	6	1	P23467-3	0	1401.73	High	High	High	High	High	High	High	High	High	213.1	2.8	15	68.9	86.9	22.2	82.3	55.9	15.6	Unique	78.27	High	0	1.26e-05
FALSE	High	VANLEANNNGR	1xTMT6plex [N-Term]	4.06073e-05	0	1	6	1	P23467-3	0	1400.74	High	Not Found	High	High	High	High	High	High	Not Found	26		0.3	2.7	10	2.7	12.1	1.9		Unique	75.38	High	0	4.213e-05
FALSE	High	QILLGPNTGLSGGMPGALPSLPGK	2xTMT6plex [N-Term; K24]	6.46742e-07	0	1	1	2	Q9NS69	0	2733.57	High	Not Found	High	High	High	High	High	High	High	417.1		93.7	126.5	129.2	165.4	143.3	97.1	151	Unique	72.74	High	0	1.673e-06
FALSE	High	LVEVKPSLVIDYLK	3xTMT6plex [N-Term; K5; K14]	0.000129603	0	1	5	1	Q460N5	0	2303.46	High	Not Found	High	High	High	High	High	High	High	151.3		180.4	128.4	143.8	228.3	183.4	133.6	183.1	Unique	36.81	High	0	0.0001314
FALSE	High	ILTPLVSLDTPGK	2xTMT6plex [N-Term; K13]	1.88545e-05	0	1	4	1	Q9HC38-2	0	1812.12	High	Not Found	High	High	High	High	High	High	High	81.1		82.4	38.3	45.9	102.6	40.7	27.2	48.5	Unique	55.91	High	0	1.998e-05
FALSE	High	NLGMTDAFELGK	2xTMT6plex [N-Term; K12]	8.89627e-07	0	1	3	1	A0A087X1N8	0	1753.96	High	Not Found	High	High	High	High	High	High	High	107.2		55.6	25.3	50.6	141.4	37.6	32.2	52.4	Unique	83.49	High	0	1.023e-06
FALSE	High	LSLLLNDISR	1xTMT6plex [N-Term]	0.000109991	0	1	1	1	Q15645	0	1372.84	High	High	High	High	High	High	High	High	High										NoQuanValues	61.66	High	0	0.0001121
FALSE	High	IPEGASLAMSLIDKK	3xTMT6plex [N-Term; K14; K15]	1.42256e-06	0	1	3	1	Q9Y4D7	1	2260.36	High	Not Found	High	High	High	High	High	High	High	142.7		55.2	99.7	185.1	51.2	172.6	124.5	29.1	Unique	41.11	High	0	1.612e-06
FALSE	High	TIPLYNLTGLSVSNGKDQLVVFHTK	3xTMT6plex [N-Term; K16; K25]; 1xDeamidated [Q/N]	3.0722e-08	0	1	3	2	O94832	1	3432.97	High	Not Found	High	High	High	High	High	High	High	63.5		56.6	77.9	147.3	84.9	107.1	93.7	81.8	Unique	51.86	High	0	3.841e-08
FALSE	High	RDETALQEEEELQLALALSQSEAEEK	2xTMT6plex [N-Term; K26]	2.35669e-06	0	1	3	1	O14964	1	3417.76	High	Not Found	High	High	High	High	High	High	High	46.6		9.8	14	7.6	9	6.9	2.7	9.3	Unique	78.84	High	0	2.643e-06
FALSE	High	IYGLGSLALYEK	2xTMT6plex [N-Term; K12]	1.72858e-06	0	1	2	5	P36542	0	1785.06	High	Not Found	High	High	High	High	High	High	High	1080.2		290.6	299.7	775.4	746.5	721.6	429.6	550.8	Unique	79.02	High	0	1.943e-06
FALSE	High	AVQLMQQVASNGATLPSALSASK	2xTMT6plex [N-Term; K23]; 1xDeamidated [N11]	2.27245e-09	0	1	9	1	I3L4C2	0	2731.51	High	High	High	High	High	High	High	High	High	114.9	2	73.1	68.9	89.5	82.9	116.4	86.1	82.5	Unique	81.37	High	0	3.038e-09
FALSE	High	VIPAADLSQQISTAGTEASGTGNMK	2xTMT6plex [N-Term; K25]	7.06128e-09	0	1	2	1	P11216	0	2905.53	High	Not Found	High	High	High	High	High	High	High	55.1		86.2	30.7	35.1	95.8	30.9	31.7	45.9	Unique	80.98	High	0	9.144e-09
FALSE	High	TTQFSCTLGEKFEETTADGR	2xTMT6plex [N-Term; K11]; 1xCarbamidomethyl [C6]	3.83543e-06	0	1	2	1	Q01469	1	2736.36	High	Not Found	High	High	High	High	High	High	High	36.9		50.1	20	83.5	103.2	94.4	73.8	41.8	Unique	51.89	High	0	4.242e-06
FALSE	High	AVLQAVSDGQWWK	2xTMT6plex [N-Term; K13]	4.6332e-05	0	2	3	2	A2RRP1; H0Y5G7	0	1946.09	High	Not Found	High	High	High	High	High	High	High	428.4		265.3	243.5	307.1	302.5	320.6	204.3	263.9	NotUnique	41.5	High	0	4.821e-05
FALSE	High	KVDDDLGTIESLEEAKK	4xTMT6plex [N-Term; K1; K16; K17]	3.11796e-05	0	1	5	1	P35580-3	2	2806.62	High	High	High	High	High	High	High	High	High	45.4	1.2	36.4	36.6	38	56.8	56.5	45.7	42.5	Unique	48.35	High	0	3.271e-05
FALSE	High	LPNGLVIASLENYSPVSR	1xTMT6plex [N-Term]; 1xDeamidated [N3]	2.00894e-07	0	1	6	5	P22695	0	2159.19	High	High	High	High	High	High	High	High	High	303.6	14.6	164.2	179.4	212.9	248.2	226.8	149.3	193.6	Unique	56.48	High	0	2.396e-07
FALSE	High	LPNGLVIASLENYSPVSR	1xTMT6plex [N-Term]	6.1327e-07	0	1	6	2	P22695	0	2158.21	High	High	High	High	High	High	High	High	High	137	6.6	71.3	84.7	100.2	109.8	120.5	61.3	80.4	Unique	57.89	High	0	7.096e-07
FALSE	High	AVATVGPISVAIDAGHESFLFYK	4xTMT6plex [N-Term; S9; S18; K23]	4.51264e-05	0	1	1	2	P07711	0	3308.91	High	Not Found	High	High	High	High	High	High	High	282.4		48.4	104.8	509.9	192.6	357.2	254.1	87.3	Unique	25.31	High	0	4.71e-05
FALSE	High	AVATVGPISVAIDAGHESFLFYK	3xTMT6plex [N-Term; S18; K23]	8.28495e-08	0	1	1	2	P07711	0	3079.74	High	Not Found	High	High	High	High	High	High	High	212.5		66.5	161.9	270.4	114.4	237.4	141.5	44	Unique	72.54	High	0	1.202e-07
FALSE	High	YMTQFADQNFSDFLFR	1xTMT6plex [N-Term]	8.21465e-07	0	1	1	1	Q8WUM0	0	2259.07	High	High	High	High	High	High	High	High	High	51.3	1.5	9	19.9	29.4	26.4	38.3	18.7	15.2	Unique	67.62	High	0	9.419e-07
FALSE	High	LTAELIEQAAQYTNAVR	1xTMT6plex [N-Term]	2.55221e-06	0	1	2	1	P09661	0	2120.15	High	High	High	High	High	High	High	High	High	99.5	1.4	29.2	69.3	44.6	66	38	26.5	42.7	Unique	69.34	High	0	2.855e-06
FALSE	High	MTNGFSGADLTEICQR	1xTMT6plex [N-Term]; 1xDeamidated [N3]; 1xCarbamidomethyl [C14]	1.74283e-08	0	1	1	2	P55072	0	2029.95	High	High	High	High	High	High	High	High	High	139	5.9	100.4	76.6	82.6	155.4	81.5	63.1	107.9	Unique	113.31	High	0	2.215e-08
FALSE	High	MTNGFSGADLTEICQR	1xTMT6plex [N-Term]; 1xCarbamidomethyl [C14]	1.42107e-09	0	1	1	1	P55072	0	2028.97	High	High	High	High	High	High	High	High	High	54.7	1.8	37.6	21	34.2	64.5	33.7	21.7	39	Unique	114.85	High	0	1.915e-09
FALSE	High	LATLGALETEGTDGHTFR	1xTMT6plex [N-Term]	2.73957e-06	0	1	2	1	O75356	0	2118.1	High	High	High	High	High	High	High	High	High	50.9	1.6	25.5	23.2	35	24.9	46.3	20.7	20.4	Unique	47.56	High	0	3.047e-06
FALSE	High	SHLPLALLPQTLLDQK	2xTMT6plex [N-Term; K16]	1.82244e-07	0	1	5	1	P0DMM9-3	0	2245.37	High	Not Found	High	High	High	High	High	High	High	80.3		73.4	27.1	36.9	150.9	31	25.2	94.8	Unique	69.67	High	0	2.172e-07
FALSE	High	LSAASTWLEDEGVGATTVMLK	3xTMT6plex [N-Term; K21; S]	3.21132e-08	0	1	2	2	Q9Y4L1	0	2866.58	High	Not Found	High	High	High	High	High	High	High	27.3		0.7	6.4	18.7	15	19.3	15.3	13.1	Unique	53.66	High	0	4.703e-08
FALSE	High	LSAASTWLEDEGVGATTVMLK	2xTMT6plex [N-Term; K21]	3.70026e-08	0	1	2	2	Q9Y4L1	0	2637.42	High	Not Found	High	High	High	High	High	High	High	165.6		70.8	87.6	142.5	80.1	160.7	89	73.2	Unique	72.74	High	0	4.586e-08
FALSE	High	YRVPDVLVADPPIAR	1xTMT6plex [N-Term]	0.000110948	0	2	3	1	Q14697; Q14697-2	1	1910.11	High	High	High	High	High	High	High	High	High	392	17.7	216.2	238.3	488.8	241.8	503.4	259.3	178.4	NotUnique	40.4	High	0	0.0001129
FALSE	High	EVSFQSTGESEWK	2xTMT6plex [N-Term; K13]	4.38004e-07	0	1	3	2	Q07021	0	1972.01	High	High	High	High	High	High	High	High	High	288.7	3	128.6	156.5	161.5	177.1	171.2	123	182.9	Unique	100.04	High	0	5.105e-07
FALSE	High	YSALFLGVAYGATR	1xTMT6plex [N-Term]	5.91849e-06	0	1	1	1	P56385	0	1717.95	High	High	High	High	High	High	High	High	High	91.3	1.6	49.2	26.7	60.8	69.5	60.3	25.1	38.8	Unique	48.82	High	0	6.478e-06
FALSE	High	ELISWGAPGSADSTR	1xTMT6plex [N-Term]	6.24336e-05	0	1	2	1	A0A140T9T7	0	1775.91	High	Not Found	High	High	High	High	High	High	High	22.5		16.8	15	13.7	23.8	8.9	11.1	15.1	Unique	44.8	High	0	6.413e-05
FALSE	High	YVSSLTEEISK	2xTMT6plex [N-Term; K11]	3.09059e-05	0	1	1	1	P49257	0	1713.97	High	Not Found	High	High	High	High	High	High	High	264.6		57.5	102.6	112.7	60.9	124.5	75.7	56.1	Unique	66.15	High	0	3.241e-05
FALSE	High	QSKPVTTPEEIAQVATISANGDK	3xTMT6plex [N-Term; K3; K23]	2.81179e-08	0	1	3	1	P10809	0	3071.72	High	Not Found	High	High	High	High	High	High	High	286.4		98.7	64.2	89	178.9	115.3	71.3	220.6	Unique	94.35	High	0	3.51e-08
FALSE	High	AANVLVSESLMCK	2xTMT6plex [N-Term; K13]; 1xCarbamidomethyl [C12]	3.83511e-07	0	2	2	1	P07948; P07948-2	0	1880.04	High	Not Found	High	High	High	High	High	High	High	129.9		105.7	84	75.3	113.8	85.6	48.2	79.2	NotUnique	89.34	High	0	4.504e-07
FALSE	High	QSKPVTTPEEIAQVATISANGDK	3xTMT6plex [N-Term; K3; K23]; 1xDeamidated [N20]	4.18719e-09	0	1	3	1	P10809	0	3072.7	High	Not Found	High	High	High	High	High	High	High	599.7		209.3	165.5	176	369.3	224.3	174.1	444.2	Unique	115.21	High	0	5.496e-09
FALSE	High	LLLENVLPAHVAPQFIGQNR	1xTMT6plex [N-Term]	4.41741e-08	0	1	1	1	Q8NFM4	0	2458.41	High	Not Found	High	High	High	High	High	High	High	36.3		34	31.9	30.7	38.7	20.4	11.2	27.9	Unique	40.58	High	0	5.456e-08
FALSE	High	VACITEQVLTLVNKR	2xTMT6plex [N-Term; K14]; 1xCarbamidomethyl [C3]	8.96905e-09	0	1	2	2	P04843	1	2202.3	High	Not Found	High	High	High	High	High	High	High	152.3		80.2	153.3	297.3	138.4	308.6	160.8	96.3	Unique	59.78	High	0	1.155e-08
FALSE	High	DFINFISDKEWK	3xTMT6plex [N-Term; K9; K12]	2.54555e-05	0	1	1	1	Q9H3N1	1	2229.25	High	Not Found	High	High	High	High	High	High	High	34.8		13.1	62.3	121	25.6	51.8	53	25.3	Unique	21.41	High	0	2.677e-05
FALSE	High	ALIEVLQPLIAEHQAR	1xTMT6plex [N-Term]	9.80121e-06	0	1	2	2	P23381	0	2030.2	High	High	High	High	High	High	High	High	High	228.1	29.6	269	96.5	109.2	346.9	91.8	104.4	148.6	Unique	64.91	High	0	1.053e-05
FALSE	High	SVLLLAYKPMEGNFEEIAR	2xTMT6plex [N-Term; K8]	0.00010442	0	1	3	2	Q16531	0	2638.47	High	Not Found	High	High	High	High	High	High	High	135.5		73.2	77.8	89.4	165.8	88.7	70.3	87.1	Unique	45.85	High	0	0.0001063
FALSE	High	VHGECIANLSFDITGR	1xTMT6plex [N-Term]; 1xCarbamidomethyl [C5]	3.97342e-07	0	1	3	1	Q9Y4P3	0	2018.03	High	Not Found	High	High	High	High	High	High	High	95.1		41.7	40.9	58.9	52.1	52.4	37.1	53.2	Unique	56.79	High	0	4.652e-07
FALSE	High	TPVGFIGLGNMGNPMAK	2xTMT6plex [N-Term; K17]	1.06203e-06	0	1	1	2	P31937	0	2162.19	High	High	High	High	High	High	High	High	High	123.4	1.3	88.6	120.9	333.1	185.3	165.6	130.4	176.5	Unique	60.72	High	0	5.011e-06
FALSE	High	HINMDGTINVDDFK	2xTMT6plex [N-Term; K14]	9.98189e-07	0	1	2	1	O75643	0	2077.08	High	High	High	High	High	High	High	High	High	421.6	11.1	94.8	285.4	183.9	275.3	208	139.4	196.9	Unique	45.65	High	0	1.138e-06
FALSE	High	LFLDRDLMTLPIQNK	2xTMT6plex [N-Term; K15]	2.27467e-06	0	1	5	1	P22830-2	1	2275.32	High	Not Found	High	High	High	High	High	High	High	39.9		47.6	29.1	103.3	107.8	96.4	47	45.9	Unique	43.93	High	0	2.541e-06
FALSE	High	LDVQFSGLTK	2xTMT6plex [N-Term; K10]	5.37904e-05	0	2	5	1	P21333-2; Q60FE5	0	1565.93	High	High	High	High	High	High	High	High	High	499.7	1.2	169.9	137	152.5	230.7	109.7	72.3	134.4	NotUnique	66.27	High	0	5.577e-05
FALSE	High	LSLAQEDLISNR	1xTMT6plex [N-Term]	6.52373e-06	0	1	1	1	Q15075	0	1587.89	High	High	High	High	High	High	High	High	High	167.9	10.4	125.7	96.4	118.7	115.4	103.3	27.8	67.1	Unique	91.94	High	0	7.095e-06
FALSE	High	ISHLVLPVQPVSSIEEQGCLF	1xTMT6plex [N-Term]; 1xCarbamidomethyl [C19]	6.02501e-07	0	1	1	2	Q8NFQ8	0	2581.39	High	High	High	High	High	High	High	High	High	254.9	9.4	90.6	107.6	131.1	89.7	143.9	82.3	65.3	Unique	67.65	High	0	6.964e-07
FALSE	High	QATLTQTLLIQNGAR	1xTMT6plex [N-Term]	4.57673e-08	0	1	1	1	P08648	0	1857.08	High	Not Found	High	High	High	High	High	High	High	33.9		4.7	6.2	27.9	8.6	20.2	8.6	1.4	Unique	98.52	High	0	5.663e-08
FALSE	High	QATLTQTLLIQNGAR	1xTMT6plex [N-Term]; 1xDeamidated [Q/N]	1.9224e-06	0	1	1	3	P08648	0	1858.06	High	High	High	High	High	High	High	High	High	299.8	1.6	52.6	68.8	182.2	59.4	184	90	43.7	Unique	66.28	High	0	2.156e-06
FALSE	High	EAAWAITNATSGGSAEQIK	2xTMT6plex [N-Term; K19]	1.10893e-09	0	1	1	1	P52294	0	2363.26	High	Not Found	High	High	High	High	High	High	High	156.5		77.1	59.6	48.7	102.4	65.3	45.4	54.2	Unique	81.91	High	0	1.502e-09
FALSE	High	KFCTTGIDGAMTIWDFK	3xTMT6plex [N-Term; K1; K17]; 1xCarbamidomethyl [C3]	1.63912e-06	0	1	2	1	Q92747	1	2678.43	High	Not Found	High	High	High	High	High	High	High	37.2		26.5	22.1	25.7	24.4	25.7	20.8	14	Unique	57.14	High	0	1.845e-06
FALSE	High	ENSLLFDPLSSSSSNKER	2xTMT6plex [N-Term; K16]	2.3988e-06	0	1	1	1	P15144	1	2468.3	High	Not Found	High	High	High	High	High	High	High	45.6		100.7	86.9	411	171.6	153.2	68.3	23.2	Unique	53.56	High	0	2.687e-06
FALSE	High	QILEDAAALIIHHVK	2xTMT6plex [N-Term; K15]	3.93868e-06	0	1	1	1	Q96ST3	0	2129.28	High	Not Found	High	High	High	High	High	High	High	33.5		8.7	24.7	16.7	20.1	18.7	10.1	18.9	Unique	45.33	High	0	4.352e-06
FALSE	High	MEDTSFPSGGNAIGVNSASSK	2xTMT6plex [N-Term; K21]	7.85618e-06	0	1	4	1	Q8N8S7	0	2514.25	High	Not Found	High	High	High	High	High	High	High	135.3		129.6	94	124.3	178	129.1	90	129.2	Unique	49.41	High	0	8.485e-06
FALSE	High	YVIWSADMSHVALLAK	2xTMT6plex [N-Term; K16]	2.10041e-06	0	1	2	1	P53621	0	2262.27	High	Not Found	High	High	High	High	High	High	High	109.3		79.4	76.3	59.1	74.1	63.3	44.4	47.9	Unique	35.44	High	0	2.36e-06
FALSE	High	VAAAVDLIIK	2xTMT6plex [N-Term; K10]	8.77651e-05	0	1	2	1	P49327	0	1470.97	High	High	High	High	High	High	High	High	High	289.6	1	97.4	124.8	100.4	198.7	226.9	136.4	85.8	Unique	63.86	High	0	9.015e-05
FALSE	High	DTVAVYLTPESK	2xTMT6plex [N-Term; K12]	4.6332e-05	0	1	1	1	Q96KP1	0	1781.01	High	Not Found	High	High	High	High	High	High	High	142.4		117.9	75.7	88.8	139.8	71.7	58.1	81.1	Unique	59.64	High	0	4.823e-05
FALSE	High	DFVSALPDKLDHECAEGGENLSVGQR	2xTMT6plex [N-Term; K9]; 1xCarbamidomethyl [C14]	1.33704e-06	0	1	7	1	P33527	1	3301.65	High	Not Found	High	High	High	High	High	High	High	128.5		112.5	61.1	41.8	96.8	33.1	36.3	67.7	Unique	40.48	High	0	1.521e-06
FALSE	High	EVLASQLLVLTGQR	1xTMT6plex [N-Term]	2.02731e-06	0	1	1	1	Q9H2M9	0	1756.05	High	Not Found	High	High	High	High	High	High	High	13.5		7.1	2.6	2.8	2.8	2.8	1.4	2.6	Unique	66.12	High	0	2.272e-06
FALSE	High	KTCESDTLEALLLTASERPKPLLFK	4xTMT6plex [N-Term; K1; K20; K25]; 1xCarbamidomethyl [C3]	6.35279e-06	0	1	2	1	Q9NYU2	1	3777.2	High	Not Found	High	High	High	High	High	High	High	62		46.1	64.4	163.8	64.1	117.5	71.7	44.2	Unique	31.57	High	0	6.936e-06
FALSE	High	LVEDHLAVQSLIR	1xTMT6plex [N-Term]	4.6332e-05	0	1	8	1	Q02218	0	1722.01	High	High	High	High	High	High	High	High	High	149.6	8.6	66.2	68.5	61	80.8	62.1	38.7	82.8	Unique	45.55	High	0	4.828e-05
FALSE	High	FLREPVVTPQDLEGPGR	1xTMT6plex [N-Term]	7.71836e-06	0	1	2	1	Q66K74	1	2139.18	High	High	High	High	High	High	High	High	High	70.9	2.9	49.6	51.7	92.3	71.9	101.3	62.5	40	Unique	44.01	High	0	8.35e-06
FALSE	High	HTQWGIDFLER	1xTMT6plex [N-Term]	4.434e-05	0	1	6	1	S4R347	0	1630.85	High	Not Found	High	High	High	High	High	High	High	56.6		20.8	15.8	15.5	30.6	19.8	15	21.5	Unique	34.13	High	0	4.594e-05
FALSE	High	QAFAELESCLMDR	1xTMT6plex [N-Term]; 1xCarbamidomethyl [C9]	1.12e-06	0	1	1	1	Q86XZ4	0	1798.87	High	Not Found	High	High	High	High	High	High	High	71.5		11.7	27	33.2	18.5	29.8	27.7	13.6	Unique	80.69	High	0	1.273e-06
FALSE	High	LDGMGCLEFDEER	1xTMT6plex [N-Term]; 1xCarbamidomethyl [C6]	3.3753e-05	0	2	5	1	Q13951; Q13951-2	0	1799.81	High	Not Found	High	High	High	High	High	Not Found	High	13.3		6.7	2.2	7.3	8.4	1.1		3.4	NotUnique	46.35	High	0	3.538e-05
FALSE	High	EGNKPVLFQGNTNPTDVVVAVFPKPLITR	3xTMT6plex [N-Term; K4; K24]	1.23355e-05	0	2	8	1	E9PEP6; O14786	0	3838.22	High	Not Found	High	High	High	High	High	High	High	20.6		1.7	15.9	54.6	7.9	35.1	20.1	6.5	NotUnique	48.74	High	0	1.325e-05
FALSE	High	QAIELVESGGMGK	2xTMT6plex [N-Term; K13]	2.96635e-07	0	1	1	1	P19634	0	1776.99	High	Not Found	High	High	High	High	High	High	High	190.2		91.1	88.9	120.7	106.7	116.6	72.5	76.9	Unique	78.49	High	0	3.488e-07
FALSE	High	LGNTISSLFGGGTTPDAK	2xTMT6plex [N-Term; K18]	2.23474e-06	0	1	6	2	Q9Y4L1	0	2194.21	High	Not Found	High	High	High	High	High	High	High	1127.9		148.4	238.6	361.3	188.2	360.9	192.8	176.4	Unique	56.91	High	0	2.501e-06
FALSE	High	GAQAAIVVYDITNEESFAR	1xTMT6plex [N-Term]	1.27826e-08	0	1	2	3	P20339	0	2283.18	High	High	High	High	High	High	High	High	High	220.3	32	179.2	147	163.9	187.4	188.4	125.4	134	Unique	86.25	High	0	1.779e-08
FALSE	High	QEVPSWLENMAYEHHYK	2xTMT6plex [N-Term; K17]	7.24429e-05	0	2	9	3	O00571; O15523	0	2619.31	High	Not Found	High	High	High	High	High	High	High	201.1		195	248.6	337.3	259.5	462.3	298.9	244.5	NotUnique	49.98	High	0	7.454e-05
FALSE	High	LYPWGVVEVENPEHNDFLK	2xTMT6plex [N-Term; K19]; 1xDeamidated [N15]	1.87151e-07	0	2	5	2	Q15019-2; B5MCX3	0	2744.43	High	Not Found	High	High	High	High	High	High	High	152.5		99.3	89.6	109.1	124.7	105.4	72.7	84.7	NotUnique	59.68	High	0	2.231e-07
FALSE	High	LYPWGVVEVENPEHNDFLK	2xTMT6plex [N-Term; K19]	7.85614e-08	0	2	5	3	Q15019-2; B5MCX3	0	2743.45	High	Not Found	High	High	High	High	High	High	High	48.9		15.7	16.8	36.3	41.9	34.1	21	29	NotUnique	71.32	High	0	9.603e-08
FALSE	High	VPDGMVGLIIGR	1xTMT6plex [N-Term]	7.56763e-05	0	1	4	1	Q92945	0	1455.86	High	Not Found	High	High	High	High	High	High	High	43.1		7.8	31.1	15.3	17.5	17.2	14.1	15	Unique	45.23	High	0	7.804e-05
FALSE	High	DAANILVMGVENSAK	2xTMT6plex [N-Term; K15]	0.00013647	0	1	3	1	Q9NWS8	0	1990.1	High	Not Found	High	High	High	High	High	High	High	162.9		77.8	82.7	120.1	132.2	100.8	70.3	84.8	Unique	48.38	High	0	0.0001381
FALSE	High	VTDAIVLLDR	1xTMT6plex [N-Term]	0.000106246	0	1	3	1	P11172	0	1343.81	High	High	High	High	High	High	High	High	High	165.7	5.8	46.8	62.4	44.5	88.7	66.9	32.6	47.1	Unique	71.25	High	0	0.0001085
FALSE	High	ELQLSVLSAESLR	1xTMT6plex [N-Term]	1.59615e-06	0	1	1	1	O00443	0	1673.96	High	Not Found	High	High	High	High	High	High	High	26.3		12.2	19.2	19.1	16.2	29.1	20.5	11.2	Unique	58.16	High	0	1.797e-06
FALSE	High	TTGEENGVEAEEWGK	2xTMT6plex [N-Term; K15]; 1xDeamidated [N6]	1.32397e-05	0	2	9	1	O00429-4; O00429	0	2095.02	High	Not Found	High	High	High	High	High	High	High	111.2		38.4	32.1	37.2	80.6	59.1	32.6	48	NotUnique	51.56	High	0	1.415e-05
FALSE	High	NTDNIIYPEEYSSCSR	1xTMT6plex [N-Term]; 1xCarbamidomethyl [C14]	1.68326e-06	0	1	2	1	Q13201	0	2177	High	Not Found	Not Found	High	High	Not Found	High	High	Not Found	20.2			7.4	20.8		14.5	12.7		Unique	38.67	High	0	1.89e-06
FALSE	High	EYEQELSDDLHVER	1xTMT6plex [N-Term]	2.85484e-05	0	1	3	1	Q7Z7F7-2	0	1990.96	High	Not Found	High	High	High	High	High	High	High	34.9		10.2	15.5	22.8	25.3	26.1	19.6	20.7	Unique	23.34	High	0	2.989e-05
FALSE	High	FLSESVLAVAGDEEVIR	1xTMT6plex [N-Term]	4.07739e-09	0	1	1	1	Q9NWT1	0	2063.12	High	Not Found	Not Found	High	High	High	High	High	Not Found	4.1			2.1	3	2.4	3.9	3.5		Unique	128.35	High	0	5.372e-09
FALSE	High	EQLLGVQQHLSNTLK	3xTMT6plex [N-Term; K15; S/T]	9.05104e-06	0	1	4	2	Q69YQ0	0	2395.43	High	Not Found	High	High	High	High	High	High	High	25.4		12.2	16	20.1	18.3	15.4	14.5	15.1	Unique	35.01	High	0	5.105e-05
FALSE	High	NLCWDVLCVDQPLVEDPR	1xTMT6plex [N-Term]; 2xCarbamidomethyl [C3; C8]	1.41002e-06	0	1	2	1	O00754	0	2457.21	High	Not Found	High	High	High	High	High	High	High	113.2		17	32.2	83.9	45.8	63.2	41	28.3	Unique	45.13	High	0	1.602e-06
FALSE	High	MLPTIIADNAGYDSADLVAQLR	1xTMT6plex [N-Term]	6.01833e-10	0	1	3	1	P78371	0	2576.36	High	High	High	High	High	High	High	High	High	59.9	1.5	44.4	23.9	26.9	55.4	30.9	22.7	33.9	Unique	89.73	High	0	8.276e-10
FALSE	High	MLPTIIADNAGYDSADLVAQLR	1xTMT6plex [N-Term]; 1xDeamidated [N9]	3.04623e-07	0	1	3	1	P78371	0	2577.34	High	High	High	High	High	High	High	High	High	50.5	2.5	39.6	25.6	23.6	48.2	22.2	21.8	24.2	Unique	74.1	High	0	3.586e-07
FALSE	High	MLPTIIADNAGYDSADLVAQLR	1xTMT6plex [N-Term]; 1xOxidation [M1]	7.99655e-08	0	1	3	2	P78371	0	2592.35	High	Not Found	High	High	High	High	High	High	High	19.3		15.3	10.4	9.9	24.7	28.1	11.6	12.3	Unique	65.73	High	0	9.76e-08
FALSE	High	EHQNIQDLEIENEDLK	2xTMT6plex [N-Term; K16]	9.54449e-06	0	1	5	1	Q9BZF9	0	2425.26	High	Not Found	High	High	High	High	High	High	High	19.7		8.1	8.6	21.1	15	17.4	11.7	13.6	Unique	43.54	High	0	1.029e-05
FALSE	High	NGNGGPGPYVGQAGTATLPR	1xTMT6plex [N-Term]; 2xDeamidated [N1; N3]	1.58103e-08	0	2	26	3	O60716-7; O60716-3	0	2115.07	High	High	High	High	High	High	High	High	High	232.8	2.8	87.1	122.2	150.5	91.3	148.4	102.6	76.9	NotUnique	81.38	High	0	2.001e-08
FALSE	High	NGNGGPGPYVGQAGTATLPR	1xTMT6plex [N-Term]; 1xDeamidated [N3]	3.9737e-06	0	2	26	1	O60716-7; O60716-3	0	2114.08	High	Not Found	High	High	High	High	High	High	High	50.3		8.7	11.6	26.9	16.3	31.3	17.6	13	NotUnique	54.46	High	0	4.397e-06
FALSE	High	AVSEMSTEIGTMISVSSAEYGTNAK	2xTMT6plex [N-Term; K25]	4.33985e-08	0	2	9	1	Q9Y520-7; E7EPN9	0	3021.52	High	Not Found	High	High	High	High	High	High	High	39.3		19.2	27.1	23.1	22.1	36.3	23.7	19.9	NotUnique	55.21	High	0	5.348e-08
FALSE	High	WSTDDVQINDISLQDYIAVK	2xTMT6plex [N-Term; K20]	2.195e-07	0	1	2	13	P46782	0	2781.47	High	High	High	High	High	High	High	High	High	408.4	2.3	174.6	219.5	287.7	252.3	385.5	253.1	198.4	Unique	86.56	High	0	2.614e-07
FALSE	High	GEGAIGSLDYTPEER	1xTMT6plex [N-Term]	1.58163e-07	0	1	1	1	Q9Y385	0	1822.9	High	High	High	High	High	High	High	High	High	72.5	8	32.5	38.4	28.3	36.5	41.4	38.5	69.5	Unique	91.94	High	0	1.9e-07
FALSE	High	VLETAEDIQER	1xTMT6plex [N-Term]	5.32204e-06	0	2	7	2	Q13813-3; A0A0D9SGF6	0	1531.82	High	High	High	High	High	High	High	High	High	332	20.7	186.1	151.2	173.5	225.4	173.7	94	158.6	NotUnique	85.29	High	0	1.088e-05
FALSE	High	VSHVLAALQAGNR	1xTMT6plex [N-Term]	9.80663e-07	0	1	1	2	Q9Y490	0	1564.91	High	High	High	High	High	High	High	High	High	235.2	4.3	165.1	105.3	117.7	201.9	125.4	65.9	90	Unique	71.9	High	0	1.121e-06
FALSE	High	WSTDDVQINDISLQDYIAVK	3xTMT6plex [N-Term; K20; T/S]	5.10314e-05	0	1	2	2	P46782	0	3010.63	High	Not Found	High	High	High	High	High	High	High	82.9		8.6	11.3	61.7	45.8	79.6	54.1	47.8	Unique	45.23	High	0	6.264e-05
FALSE	High	VVLVSSASDIPVQSHR	1xTMT6plex [N-Term]	1.6082e-05	0	1	3	2	P46939	0	1923.09	High	High	High	High	High	High	High	High	High	65.5	7.2	56.5	55.6	43.2	50.4	48.9	29.6	37.5	Unique	59.07	High	0	1.718e-05
FALSE	High	FEGLEADADDSNTR	1xTMT6plex [N-Term]	6.35386e-07	0	1	2	1	Q86VI3	0	1768.82	High	Not Found	High	High	High	High	High	High	High	24.2		0.5	9.7	9.2	6.5	7.3	8.4	8.3	Unique	87.6	High	0	7.336e-07
FALSE	High	KIYQNIQDGSLDLNAAESGVQHKPSAPQGGR	3xTMT6plex [N-Term; K1; K23]; 1xDeamidated [Q/N]	1.71093e-10	0	1	1	7	P61106	1	3967.12	High	Not Found	High	High	High	High	High	High	High	4.7		3.9	2.8	10	6.2	9.7	4.6	2.8	Unique	95.17	High	0	2.437e-10
FALSE	High	KIYQNIQDGSLDLNAAESGVQHKPSAPQGGR	3xTMT6plex [N-Term; K1; K23]	1.10977e-07	0	1	1	1	P61106	1	3966.14	High	Not Found	High	High	High	High	High	High	High	71.1		36.7	38.4	61.3	74.7	75.7	45.8	56.8	Unique	47.66	High	0	1.342e-07
FALSE	High	SIESTLDDLFR	1xTMT6plex [N-Term]	8.85323e-05	0	1	8	2	O00468-3	0	1524.81	High	High	High	High	High	High	High	High	High	99.9	1	11	40.1	81.2	23.6	98.3	38.5	6.9	Unique	59.65	High	0	9.075e-05
FALSE	High	FYLDSGEQVLVDVETK	2xTMT6plex [N-Term; K16]	0.000115851	0	1	3	2	P82663	0	2300.24	High	High	High	High	High	High	High	High	High	107.6	1.5	45.5	43.9	77.6	80.6	72.9	56.6	62.8	Unique	49.52	High	0	0.0001177
FALSE	High	DLDGNIPLLLAVQNGHSEICHFLLDHGADVNSR	1xTMT6plex [N-Term]; 1xDeamidated [Q13]; 1xCarbamidomethyl [C20]	6.64024e-06	0	2	4	1	Q9P0K7; Q9P0K7-4	0	3869.94	High	High	High	High	High	High	High	High	High	37.7	7.1	55.2	84	47.6	27.6	24.2	26.2	33.3	NotUnique	22.89	High	0	7.228e-06
FALSE	High	QEHPEWGDEQLFQTSR	1xTMT6plex [N-Term]	8.43302e-08	0	1	1	1	P35354	0	2216.06	High	Not Found	High	High	High	High	High	High	High	22.8		0.6	14.1	10.2	2.3	19.4	5.5	1.4	Unique	58.06	High	0	1.027e-07
FALSE	High	QELEREEEALASK	2xTMT6plex [N-Term; K13]	7.71836e-06	0	1	9	1	P53814-5	1	1990.09	High	High	High	High	High	High	High	High	High	181.8	1.2	36.9	99.5	99.5	55.8	141.2	81.9	40	Unique	47.22	High	0	8.369e-06
FALSE	High	ISQEIGNLMK	2xTMT6plex [N-Term; K10]	0.000125212	0	1	4	1	Q32P28	0	1590.93	High	Not Found	High	High	High	High	High	High	High	109.7		24.7	38.4	83.9	38.1	78.4	46.8	31.6	Unique	60.07	High	0	0.0001274
FALSE	High	DPESSAMLDYELHSDFVSSLIK	2xTMT6plex [N-Term; K22]	3.01711e-09	0	1	2	1	O75051	0	2941.49	High	Not Found	High	High	High	High	High	High	High	101.2		31.2	47	40.4	22.9	58.3	30.9	20	Unique	68.11	High	0	3.987e-09
FALSE	High	VGDQVWLFIDEPR	1xTMT6plex [N-Term]	2.90564e-05	0	1	3	1	P49588	0	1802.96	High	High	High	High	High	High	High	High	High	21.7	1.7	13	6.7	11.2	24.3	6.1	8.7	11.1	Unique	43.76	High	0	3.043e-05
FALSE	High	NASLASSNNDLQVAEEQYQR	1xTMT6plex [N-Term]	4.82471e-09	0	1	3	1	Q08378	0	2466.21	High	Not Found	High	High	High	High	High	High	High	57.2		18.9	11	34.7	40.5	38.1	29.4	29	Unique	87.85	High	0	6.327e-09
FALSE	High	AQEANMGLLDEILK	2xTMT6plex [N-Term; K14]	3.20149e-05	0	1	3	1	Q9UDR5	0	2003.12	High	Not Found	High	High	High	High	High	High	High	114.3		43.3	66.2	69.6	79.8	66.6	50	76.3	Unique	42.75	High	0	3.365e-05
FALSE	High	GTVTYIAPPGNYDTSDVVLELEFEGVKEK	3xTMT6plex [N-Term; K27; K29]	1.6082e-05	0	1	4	1	P38606	1	3858.07	High	Not Found	High	High	High	High	High	High	High	11.4		26.1	19.3	78.4	48.7	65.1	32.5	26.1	Unique	41.35	High	0	1.707e-05
FALSE	High	FLSDPQVHTVLVER	1xTMT6plex [N-Term]	9.13147e-06	0	1	1	2	Q14204	0	1869.04	High	High	High	High	High	High	High	High	High	631.4	77.8	517.5	340.2	276.6	321.3	260.6	135.5	224.1	Unique	40.48	High	0	9.883e-06
FALSE	High	GIVAAQETQIQELAAANQESSHVQQQALALEQQFLER	2xTMT6plex [N-Term; S]; 1xDeamidated [N/Q]	0.000140033	0	1	1	3	Q92805	0	4536.37	High	Not Found	Not Found	High	High	High	High	High	High	3.5			2	6	1.3	6.3	2	1.4	Unique	31.1	High	0.0002191	0.0009522
FALSE	High	DIKQEESILMK	3xTMT6plex [N-Term; K3; K11]	6.81433e-05	0	1	2	1	Q8IVG5	1	2021.19	High	Not Found	High	High	High	High	High	High	High	63.9		50.7	33.8	48.1	64.7	37.5	26.8	29.9	Unique	22.28	High	0	7.014e-05
FALSE	High	AVYSNADIYLFDDPLSAVDAHVGK	2xTMT6plex [N-Term; K24]	8.81394e-06	0	1	7	1	P33527	0	3038.59	High	High	High	High	High	High	High	High	High	110	3.4	138.2	67.5	67.4	126.7	51.8	38.2	74.1	Unique	42.96	High	0	9.515e-06
FALSE	High	AVYSNADIYLFDDPLSAVDAHVGK	3xTMT6plex [N-Term; S4; K24]	4.28078e-05	0	1	7	1	P33527	0	3267.75	High	Not Found	High	High	High	High	High	High	High	18.8		20.2	7.7	16.6	24.2	14.5	8.6	12.9	Unique	44.58	High	0	4.456e-05
FALSE	High	AQGLEEGVAETLVLVK	2xTMT6plex [N-Term; K16]	5.87201e-05	0	1	7	1	Q13308-6	0	2114.25	High	High	High	High	High	High	High	High	High	187.6	2	56.5	103.1	172.4	53.3	209.7	91.6	47.2	Unique	46.39	High	0	6.077e-05
FALSE	High	ASAFALQEQPVVNAVIDDTTKEVVYR	2xTMT6plex [N-Term; K21]	2.04145e-05	0	1	2	1	P36957	1	3321.81	High	Not Found	High	High	High	High	High	High	High	11.7		22.1	10.6	99.9	45.2	65.7	24.9	15.2	Unique	46.67	High	0	2.159e-05
FALSE	High	GGQLQEQLTQQLSQALSSAVAGR	1xTMT6plex [N-Term]	3.63529e-08	0	1	2	1	Q6P2E9	0	2599.4	High	High	High	High	High	High	High	High	High	167.3	27.1	126.6	79	104	122.8	108.4	85.7	95.6	Unique	83.1	High	0	4.507e-08
FALSE	High	FEIINAIYEPTEEECEWKPDEEDEISEELKEK	4xTMT6plex [N-Term; K18; K30; K32]; 1xCarbamidomethyl [C15]	1.6828e-07	0	2	10	1	F8VV59; P55209	1	4887.45	High	Not Found	High	High	High	High	High	High	High	37.8		19.9	11.3	21.9	48.9	18.6	19.2	19	NotUnique	57.19	High	0	2.019e-07
FALSE	High	TGSYGALAEITASK	2xTMT6plex [N-Term; K14]	6.40816e-08	0	1	8	1	O14974	0	1827.03	High	Not Found	High	High	High	High	High	High	High	22.6		10.6	2.1	10.3	25.7	11.4	8.2	14.7	Unique	94.71	High	0	7.849e-08
FALSE	High	YMFDFLDEQADR	1xTMT6plex [N-Term]	6.99544e-05	0	1	1	1	O75051	0	1778.83	High	Not Found	High	High	High	High	High	High	High	73.2		18.4	19.8	24.4	11.9	25.7	19.2	14.9	Unique	21.41	High	0	7.183e-05
FALSE	High	DYLGDFIEHYAQLGPSQPPDLAQAQDEPR	1xTMT6plex [N-Term]	1.43363e-05	0	1	1	1	Q00577	0	3499.7	High	High	High	High	High	High	High	High	High	128.5	7.1	76.9	79	62.6	70.6	66.4	55.6	58.3	Unique	26.45	High	0	1.526e-05
FALSE	High	YPGSTFMDHVLR	1xTMT6plex [N-Term]	2.33053e-05	0	2	3	1	P53396; P53396-2	0	1651.85	High	High	High	High	High	High	High	High	High	84.5	9.6	65	58.1	18.6	32.6	27.8	21.8	28.5	NotUnique	51.77	High	0	2.45e-05
FALSE	High	ISVGSDSDLVIWDPDAVK	2xTMT6plex [N-Term; K18]	2.11485e-05	0	1	3	1	Q14195-2	0	2374.29	High	Not Found	High	High	High	High	High	High	High	152.8		152.7	52	76.4	160	69	51.3	69.2	Unique	34.9	High	0	2.246e-05
FALSE	High	FGYQFTQQGPR	1xTMT6plex [N-Term]	0.000137648	0	1	3	1	Q9NYL9	0	1557.8	High	Not Found	High	High	High	High	High	High	High	34.6		23.8	14.4	25.9	36.9	22.3	13.6	18.3	Unique	47.87	High	0	0.0001397
FALSE	High	HLAGLGLTEAIDK	2xTMT6plex [N-Term; K13]	3.31635e-05	0	1	2	2	P50454	0	1796.07	High	Not Found	High	High	High	High	High	High	High	365.4		35.1	183.1	374.6	105.6	230.8	201.8	118	Unique	54.81	High	0	3.478e-05
FALSE	High	KNQALNIAWQK	3xTMT6plex [N-Term; K1; K11]	3.06347e-05	0	1	3	1	O95347	1	2001.22	High	Not Found	High	High	High	High	High	High	High	75.8		19.9	39.8	61.3	50.1	91.1	66.7	49.8	Unique	44.6	High	0	3.215e-05
FALSE	High	VVLHDGDPNEPVSDYINANIIMPEFETK	2xTMT6plex [N-Term; K28]	3.63529e-08	0	1	3	1	Q06124-2	0	3614.85	High	Not Found	High	High	High	High	High	High	High	35.8		18.3	16.7	17.6	28.2	22.6	12.6	15.1	Unique	70.11	High	0	4.536e-08
FALSE	High	TVQLTSSELESTLETLK	2xTMT6plex [N-Term; K17]	1.77238e-05	0	1	1	2	P42704	0	2337.32	High	High	High	High	High	High	High	High	High	240.8	2.3	80.2	92.4	134.9	136.2	143.6	93.1	132.7	Unique	43.78	High	0	1.876e-05
FALSE	High	ESDTGLAPPALWDLAADKQTLQSEQPLQVAR	2xTMT6plex [N-Term; K18]	3.63699e-06	0	1	3	1	P35998	1	3807.03	High	Not Found	High	High	High	High	High	High	High	16.4		66.8	28	51.7	82.2	49.5	33.6	35.6	Unique	58.3	High	0	4.014e-06
FALSE	High	NIADLMTQAGVEELESENK	2xTMT6plex [N-Term; K19]	3.76777e-07	0	1	1	1	O75506	0	2549.32	High	Not Found	High	High	High	High	High	High	High	64.3		16.7	17.5	18.8	23.9	23.1	17.9	23.6	Unique	62	High	0	4.408e-07
FALSE	High	LHALVVGPGLGR	1xTMT6plex [N-Term]	1.59405e-05	0	1	3	1	Q8IW45-2	0	1417.88	High	High	High	High	High	High	High	High	High	21.3	7.2	10.5	11	17.7	25.1	14.3	12.9	13	Unique	30.04	High	0	1.694e-05
FALSE	High	EVIELPLTNPELFQR	1xTMT6plex [N-Term]	3.57315e-06	0	1	4	1	A0A087X2I1	0	2027.14	High	High	High	High	High	High	High	High	High	161.9	18.3	126.7	77.3	63.2	154.4	68.3	50.2	78.5	Unique	54.09	High	0	3.951e-06
FALSE	High	NIPMTLELLQSTR	1xTMT6plex [N-Term]	7.38428e-06	0	1	4	1	A0A1W2PPZ5	0	1744.98	High	Not Found	High	High	High	High	High	High	High	26.9		18.1	21.4	39	45.2	56.2	36.2	32.1	Unique	79.58	High	0	7.988e-06
FALSE	High	FVTAAELPRDEADALYEALK	2xTMT6plex [N-Term; K20]	7.12744e-06	0	1	2	1	O95236	1	2680.46	High	High	High	High	High	High	High	High	High										NoQuanValues	57.75	High	0	7.747e-06
FALSE	High	GPFELEAFYSDPQGVPYPEAK	2xTMT6plex [N-Term; K21]	0.00010717	0	1	5	1	Q92598	0	2799.43	High	Not Found	High	High	High	High	High	High	High	33.4		92	18.5	21.7	106.2	21.3	35.1	58.8	Unique	36.34	High	0	0.000109
FALSE	High	DIVPGDIVEIAVGDKVPADIR	2xTMT6plex [N-Term; K15]	1.80569e-08	0	1	4	3	P16615	1	2649.52	High	High	High	High	High	High	High	High	High	351	1.7	224.9	225.5	283.3	278	356.1	214.9	230.6	Unique	58.44	High	0	2.289e-08
FALSE	High	AGNELLESSAGDDASSLR	1xTMT6plex [N-Term]	2.2317e-10	0	2	8	1	Q9UPN3; Q9UPN3-5	0	2021	High	Not Found	High	High	High	High	High	High	High	42.9		13.8	17.4	17.3	17.2	22.5	8.4	14.4	NotUnique	93.46	High	0	3.155e-10
FALSE	High	LASHLNLAMCHLK	2xTMT6plex [N-Term; K13]; 1xCarbamidomethyl [C10]	0.000130724	0	1	1	1	Q02790	0	1966.11	High	Not Found	High	High	High	High	High	High	High	44.4		47.7	22.5	32.7	81.4	30.2	19.1	47.6	Unique	40.08	High	0	0.0001331
FALSE	High	IEEVPELPLVVEDKVEGYK	3xTMT6plex [N-Term; K14; K19]	2.06303e-07	0	1	2	3	P36578	1	2872.65	High	Not Found	High	High	High	High	High	High	High	457.2		170.1	239.3	237	213.4	279.2	205.9	196.3	Unique	58.72	High	0	1.739e-06
FALSE	High	DPESSAMLDYELHSDFVSSLIK	3xTMT6plex [N-Term; S18; K22]	9.46042e-06	0	1	2	1	O75051	0	3170.65	High	High	High	High	High	High	High	High	High	130.3	1.1	32.2	41.2	76.4	40.2	89.1	65.8	28.3	Unique	34.34	High	0	1.022e-05
FALSE	High	GSMVGPFQEAAFALPVSGMDKPVFTDPPVK	3xTMT6plex [N-Term; K21; K30]	8.20566e-10	0	1	2	2	Q9Y237-2	0	3807.05	High	High	High	High	High	High	High	High	High	228.8	1.8	148.7	226.5	293.7	219	308.1	229.4	186.9	Unique	86.45	High	0	1.121e-09
FALSE	High	TTDLSIQLPSVDLEVQAGQVDVK	2xTMT6plex [N-Term; K23]	0.000140033	0	1	2	1	Q8IVF2	0	2913.62	High	Not Found	High	High	High	High	High	High	High	53.1		28.2	14.2	31.2	30.5	22.9	15.4	26.1	Unique	56.43	High	0	0.0001421
FALSE	High	KGNTMQQFLQK	3xTMT6plex [N-Term; K1; K11]	6.46624e-06	0	1	2	1	Q14320	1	2010.18	High	Not Found	High	High	High	High	High	High	High	133.9		67.8	91.1	113	70.4	160.9	120.4	73.8	Unique	57.97	High	0	7.03e-06
FALSE	High	YYTEFPTVLDITAEDPSK	2xTMT6plex [N-Term; K18]	1.35956e-05	0	1	2	1	O14929	0	2547.33	High	Not Found	High	High	High	High	High	High	High	222.8		50.3	86.2	63.4	139.3	122.9	76.8	78.3	Unique	35.23	High	0	1.448e-05
FALSE	High	LEPDAEEAAR	1xTMT6plex [N-Term]	0.000117871	0	1	3	1	Q8TD43	0	1329.68	High	Not Found	High	High	High	High	High	High	High	36.4		42	20	15.2	44.5	16.5	9.1	26.7	Unique	55.48	High	0	0.0001202
FALSE	High	VVAGDEWLFEGPGTYIPR	1xTMT6plex [N-Term]	1.06135e-05	0	1	2	1	Q14764	0	2235.16	High	High	High	High	High	High	High	High	High	294.4	15.7	197.5	54	34.5	123.9	32.4	23.6	57	Unique	36.75	High	0	1.142e-05
FALSE	High	GILDYNHEILGQQINDFTLPDVNLIGEHSDAAELGR	1xTMT6plex [N-Term]	2.07745e-12	0	1	1	1	Q86VS8	0	4206.13	High	High	High	High	High	High	High	High	High	53.5	12	44.9	31.9	43.1	47.3	43.8	30.5	35.3	Unique	130.43	High	0	3.295e-12
FALSE	High	HIVLSGGSTMYPGLPSR	2xTMT6plex [N-Term; S/T]	5.33205e-05	0	1	3	4	P61160	0	2230.24	High	Not Found	High	High	High	High	High	High	High	211.2		111.9	124.6	232	211.2	281.8	192.7	172.9	Unique	29.52	High	0	5.534e-05
FALSE	High	GILDYNHEILGQQINDFTLPDVNLIGEHSDAAELGR	1xTMT6plex [N-Term]; 1xDeamidated [N]	2.82978e-05	0	1	1	2	Q86VS8	0	4207.11	High	Not Found	High	High	High	High	Not Found	Not Found	Not Found	2.9		1.5	1.4	1.3	2.4				Unique	41.4	High	0	2.981e-05
FALSE	High	HIVLSGGSTMYPGLPSR	1xTMT6plex [N-Term]	4.74179e-08	0	1	3	2	P61160	0	2001.08	High	High	High	High	High	High	High	High	High	118.4	11	137	131.6	103.4	93.4	138.3	82.9	76.3	Unique	69.38	High	0	5.877e-08
FALSE	High	HPDVEVDGFSELR	1xTMT6plex [N-Term]	4.20615e-05	0	1	3	1	P09874	0	1728.88	High	High	High	High	High	High	High	High	High	86.7	1.9	20.6	67.3	48.6	56.8	77.2	47.1	49.7	Unique	55.43	High	0	4.371e-05
FALSE	High	ACGDVLVTAELILR	1xTMT6plex [N-Term]; 1xCarbamidomethyl [C2]	3.10068e-07	0	2	5	3	Q9NZM1; Q9NZM1-3	0	1759	High	High	High	High	High	High	High	High	High	78.7	2.3	47.1	41.3	37.4	44.9	37.9	22.3	38.2	NotUnique	78.13	High	0	3.657e-07
FALSE	High	ERPTPSLNNNCTTSEDSLVLYNR	1xTMT6plex [N-Term]; 1xDeamidated [N]; 1xCarbamidomethyl [C11]	8.25738e-05	0	1	2	2	P07814	0	2910.41	High	Not Found	High	High	High	High	High	High	High	10.5		6.2	1.5	1.7	5.3	2.2	2.4	5.6	Unique	28.01	High	0	8.47e-05
FALSE	High	ERPTPSLNNNCTTSEDSLVLYNR	1xTMT6plex [N-Term]; 1xCarbamidomethyl [C11]	3.38532e-09	0	1	2	1	P07814	0	2909.43	High	High	High	High	High	High	High	High	High	68.1	5.4	36.3	24.6	20.9	39.3	28.1	17	24.9	Unique	78.3	High	0	4.463e-09
FALSE	High	FLNDTSLPHSCFR	1xTMT6plex [N-Term]; 1xCarbamidomethyl [C11]	4.71533e-05	0	1	4	1	O43795	0	1822.91	High	High	High	High	High	High	High	High	High	97.1	2.3	48.5	53.8	46.9	51.8	47.9	34.5	32.5	Unique	38.05	High	0	4.893e-05
FALSE	High	KEIEVDSSPSVLEILDTAGTEQFASMR	2xTMT6plex [N-Term; K1]	6.22826e-13	0	3	4	1	P10114; Q9Y3L5; P61225	1	3410.78	High	Not Found	High	High	High	High	High	High	High	103.2		86.9	76.7	77.3	101	73.3	60.7	66.7	NotUnique	146.73	High	0	1.023e-12
FALSE	High	IMEGPAFNFLDAPAVR	1xTMT6plex [N-Term]	2.45727e-05	0	1	3	2	P11177	0	1977.05	High	High	High	High	High	High	High	High	High	176	9.5	92.6	103.6	158.6	149.6	137.1	89.8	130.1	Unique	45.23	High	0	2.594e-05
FALSE	High	RTEGFSVTLDDLAPDTTYLVQVQALTQEGQGAGSK	2xTMT6plex [N-Term; K35]	1.58163e-07	0	1	1	2	P29317	1	4154.17	High	Not Found	High	High	High	High	High	High	High	41.2		18.8	26.7	36.1	18.4	35.1	22.7	9.2	Unique	72.71	High	0	1.896e-07
FALSE	High	VAEDYVSVAAFQVMTEDK	2xTMT6plex [N-Term; K18]	2.11485e-05	0	1	2	1	Q969Q5	0	2460.27	High	Not Found	High	High	High	High	High	High	High	43.9		18.2	19.1	28.5	29	26.6	17.9	28.2	Unique	46.88	High	0	2.229e-05
FALSE	High	TLTPIIQEYFEHGDTNEVAEMLR	1xTMT6plex [N-Term]	2.00894e-07	0	1	3	1	Q53EL6	0	2935.47	High	Not Found	High	High	High	High	High	High	High	24.4		42.5	14.7	15.2	45.8	12.1	13	29.8	Unique	72.65	High	0	2.389e-07
FALSE	High	AAESLADPTEYENLFPGLK	2xTMT6plex [N-Term; K19]	9.57395e-05	0	1	2	1	P35606	0	2523.34	High	Not Found	High	High	High	High	High	High	High	259.6		221.2	90.1	152	212.3	142.4	82.8	102	Unique	56.99	High	0	9.807e-05
FALSE	High	KTGCNVLLIQK	3xTMT6plex [N-Term; K1; K11]; 1xCarbamidomethyl [C4]	8.81394e-06	0	1	2	1	P50991	1	1961.22	High	Not Found	High	High	High	High	High	High	High	437.4		258	188.4	204	422.7	210.6	175.6	245.1	Unique	44	High	0	9.512e-06
FALSE	High	GHHVAQLDPLGILDADLDSSVPADIISSTDK	2xTMT6plex [N-Term; K31]	3.53996e-08	0	1	5	4	Q02218	0	3657.94	High	Not Found	High	High	High	High	High	High	High	49.8		48.7	42.1	39.6	63.3	41	29	45.5	Unique	77.82	High	0	4.413e-08
FALSE	High	SGTVPTPLVVGLGAACEVAQQEMEYDHK	2xTMT6plex [N-Term; K28]; 1xCarbamidomethyl [C16]	6.88109e-07	0	1	3	1	Q9Y697	0	3444.75	High	Not Found	High	High	High	High	High	High	High	42.8		6.5	7.5	10.1	13.1	8.7	3.2	10.7	Unique	67.44	High	0	7.928e-07
FALSE	High	QDLAAIPDFQSGAMENWGLTTYR	1xTMT6plex [N-Term]	2.46338e-06	0	1	2	1	Q9NZ08-2	0	2813.38	High	High	High	High	High	High	High	High	High	169.7	4.6	49.5	88.3	164.4	88.4	140.3	63.8	48.9	Unique	69.27	High	0	2.741e-06
FALSE	High	VEELCPFPLDSLQQEMSK	2xTMT6plex [N-Term; K18]; 1xCarbamidomethyl [C5]	1.04273e-05	0	1	1	1	Q96HY7	0	2608.34	High	Not Found	High	High	High	High	High	High	High	59.2		40.2	29.7	53.4	57	34.3	23.1	37.9	Unique	40.63	High	0	1.123e-05
FALSE	High	LHAVVETLVNHR	1xTMT6plex [N-Term]	2.04534e-06	0	1	4	1	Q13596	0	1616.94	High	Not Found	High	High	High	High	High	High	High	21.7		14.9	10.2	7.1	18.6	6	1.8	7.7	Unique	55.22	High	0	2.295e-06
FALSE	High	KGGPGSTLSFVGK	3xTMT6plex [N-Term; K1; K13]	9.63445e-07	0	1	1	1	Q9BQ61	1	1922.17	High	High	High	High	High	High	High	High	High	310.4	1.6	94.9	216.5	226.3	175.5	353.1	215.5	151.8	Unique	58.44	High	0	1.1e-06
FALSE	High	DMNDNAPTIEIR	1xTMT6plex [N-Term]	1.97059e-05	0	1	2	1	Q08174-2	0	1617.81	High	High	High	High	High	High	High	High	High	96.9	0.9	24	55.2	66.1	18.1	55.7	56.7	6	Unique	80.7	High	0	2.085e-05
FALSE	High	KLQGILSQSQDK	3xTMT6plex [N-Term; K1; K12]	4.08067e-06	0	2	5	1	Q13439; Q13439-5	1	2032.24	High	High	High	High	High	High	High	High	High	199.5	1.7	60	74.1	155	89.7	151.8	83.4	64.7	NotUnique	46.64	High	0	4.498e-06
FALSE	High	VLIKPEIQNNQK	3xTMT6plex [N-Term; K4; K12]	5.01432e-05	0	1	9	1	Q9HAU0-4	0	2111.32	High	Not Found	High	High	High	High	High	High	High	60.9		42.3	45.8	54.1	55.2	64.7	46.9	35.5	Unique	25.15	High	0	5.22e-05
FALSE	High	VYAAATEDMDCLTFGSPVLMR	1xTMT6plex [N-Term]; 1xCarbamidomethyl [C11]	5.27356e-08	0	1	2	1	P39748	0	2576.24	High	High	High	High	High	High	High	High	High	40.7	2.3	8.6	30.5	35.1	20.8	44.3	26.4	27.5	Unique	67.4	High	0	6.515e-08
FALSE	High	EGDLITLLVPEAR	1xTMT6plex [N-Term]	9.46042e-06	0	1	9	1	I3L4C2	0	1654.96	High	Not Found	High	High	High	High	High	High	High										NoQuanValues	45.3	High	0	1.023e-05
FALSE	High	NLGTNQCLDVGENNR	1xTMT6plex [N-Term]; 1xCarbamidomethyl [C7]	2.90564e-05	0	1	1	1	Q8NCL4	0	1932.94	High	Not Found	High	High	High	High	High	High	High	47.7		4.5	7.6	28.5	9	20.9	13.1	8.4	Unique	50.75	High	0	3.048e-05
FALSE	High	QGFDITYESNEWDTEPLQVFVVPHSHNDPGWLK	2xTMT6plex [N-Term; K33]	3.86954e-06	0	1	1	1	Q16706	0	4343.14	High	Not Found	High	High	High	Not Found	High	High	High	14.3		1.4	11.2	23.6		4.3	2.6	2	Unique	57.55	High	0	4.281e-06
FALSE	High	VLATVTKPVGGDK	3xTMT6plex [N-Term; K7; K13]	4.3952e-05	0	1	6	3	Q02878	0	1972.24	High	High	High	High	High	High	High	High	High	715.8	1.7	290.2	351.9	472.4	386.8	666.9	434.2	325.1	Unique	31.48	High	0	4.576e-05
FALSE	High	NQDEESQEAPELLK	2xTMT6plex [N-Term; K14]	1.48523e-05	0	1	3	1	Q8NE71	0	2088.09	High	Not Found	High	High	High	High	High	High	High	148.2		84.2	52.6	89.8	141.9	92.4	72.2	100	Unique	37.36	High	0	1.588e-05
FALSE	High	SKPIPIMPASPQK	3xTMT6plex [N-Term; K2; K13]	3.3288e-06	0	2	9	1	O00429-4; O00429	0	2081.28	High	Not Found	High	High	High	High	High	High	High	327.2		173.7	119.5	118.5	300.4	173.9	110.7	138.2	NotUnique	57.53	High	0	3.702e-06
FALSE	High	QNSQLPAQVQNGPSQEELEIQR	1xTMT6plex [N-Term]	3.183e-08	0	1	6	1	Q8N8S7	0	2722.4	High	Not Found	High	High	High	High	High	High	High	39.5		19.1	14.8	31.4	50.3	39.2	25.6	37.1	Unique	73.31	High	0	3.964e-08
FALSE	High	NTVVLFVPQQEAWVVER	1xTMT6plex [N-Term]	9.46042e-06	0	1	2	2	Q9UJZ1	0	2243.24	High	High	High	High	High	High	High	High	High	127.6	1.9	35.4	38.4	121.3	102.7	109.6	86.5	101.4	Unique	48.29	High	0	1.021e-05
FALSE	High	DLIQVVHEYTKEELQVPTDETDFVCFDGGR	2xTMT6plex [N-Term; K11]; 1xCarbamidomethyl [C25]	1.23355e-05	0	1	3	1	Q5JRA6	1	3997.99	High	Not Found	High	High	High	High	High	High	High	56.8		14.2	36.8	37.6	18.2	40.3	19.4	9.4	Unique	29.48	High	0	1.318e-05
FALSE	High	IGSSELQEFCPTILQQLDSR	1xTMT6plex [N-Term]; 1xCarbamidomethyl [C10]	4.74179e-08	0	1	4	1	Q15043	0	2550.31	High	Not Found	High	High	High	High	High	High	High	55.5		4.8	14.2	23.4	5.3	33.2	18.6	5.5	Unique	77.81	High	0	5.827e-08
FALSE	High	DYLLLVMEGTDDGR	1xTMT6plex [N-Term]	2.00894e-07	0	1	3	1	Q9HDC9	0	1825.92	High	High	High	High	High	High	High	High	High	193.9	7.3	66.1	95	104.1	79.6	105.3	65.7	52.9	Unique	96.67	High	0	2.398e-07
FALSE	High	QFNYTHICAGASAFGK	3xTMT6plex [N-Term; S12; K16]; 1xCarbamidomethyl [C8]	0.00012307	0	1	6	1	P13804	0	2459.31	High	Not Found	High	High	High	High	High	High	High	214.3		48.2	74.6	383.1	217	204.9	159	220.8	Unique	20.26	High	0	0.0001252
FALSE	High	QFNYTHICAGASAFGK	2xTMT6plex [N-Term; K16]; 1xCarbamidomethyl [C8]	4.34157e-06	0	1	6	1	P13804	0	2230.15	High	Not Found	High	High	High	High	High	High	High	77.1		55.7	63.5	89	53.7	49	35.9	57.2	Unique	64.97	High	0	4.778e-06
FALSE	High	QEELYSELQAR	1xTMT6plex [N-Term]	1.30076e-05	0	3	9	2	Q15149-4; Q15149; Q15149-3	0	1594.83	High	Not Found	High	High	High	High	High	High	High	244.7		59.3	60.2	54.5	80.6	56.9	44.1	67.8	NotUnique	77.12	High	0	1.39e-05
FALSE	High	SVALCVAACPR	1xTMT6plex [N-Term]; 2xCarbamidomethyl [C5; C9]	5.82077e-05	0	1	3	1	Q8WWI5	0	1432.76	High	Not Found	High	High	High	High	High	High	High	76.8		22.2	36	50.4	30.1	33.3	20.5	23.1	Unique	62.66	High	0	6.024e-05
FALSE	High	LLREELQLLQEQGSYVGEVVR	1xTMT6plex [N-Term]	6.34682e-10	0	1	7	1	P62195	1	2687.49	High	High	High	High	High	High	High	High	High	80.8	2.2	70.1	44.9	50.6	108.3	44.7	39.2	41.5	Unique	114.83	High	0	8.755e-10
FALSE	High	SLGDGIFWIQER	1xTMT6plex [N-Term]	2.45727e-05	0	1	2	1	Q68D91	0	1649.88	High	Not Found	High	High	High	High	High	High	High	58.8		24	30.7	43.6	42.5	46.3	26.3	26.7	Unique	75.55	High	0	2.596e-05
FALSE	High	WVTFPQVDGQWEELSGLDEEQHSVR	1xTMT6plex [N-Term]	1.37304e-06	0	1	5	2	P54760	0	3200.55	High	High	High	High	High	High	High	High	High	91.2	3.4	26.2	47.7	60.1	17.5	59.7	40.3	8.2	Unique	62.86	High	0	1.559e-06
FALSE	High	QQQDEAYLASLR	1xTMT6plex [N-Term]	2.33053e-05	0	1	1	2	Q96CS3	0	1650.86	High	High	High	High	High	High	High	High	High	142.3	7.4	94.3	68.5	101.9	160.5	111.8	72.9	128.2	Unique	72.75	High	0	2.468e-05
FALSE	High	GAGATLEHQQEISK	2xTMT6plex [N-Term; K14]	4.34142e-07	0	1	1	2	Q9Y5S2	0	1927.06	High	Not Found	High	High	High	High	High	High	High	267.9		231.9	210	244.4	326.4	271.8	208	185.4	Unique	45.45	High	0	5.054e-07
FALSE	High	GEAGQNLLEMMACDR	1xTMT6plex [N-Term]; 1xCarbamidomethyl [C13]	4.20615e-05	0	1	9	1	P49792	0	1923.89	High	High	High	High	High	High	High	High	High	84	9.2	13.9	43.2	39.1	35.2	44.1	29.5	29.2	Unique	52	High	0	4.384e-05
FALSE	High	GTEAPAVVTEEEDDDEETAPPVIAPRPDHTK	2xTMT6plex [N-Term; K31]	1.05073e-11	0	1	1	1	Q13177	0	3773.88	High	High	High	High	High	High	High	High	High	406.2	11	371.8	213.8	205.8	444.2	246	162.6	187.7	Unique	95.83	High	0	1.604e-11
FALSE	High	KLPVSSLTISR	2xTMT6plex [N-Term; K1]	4.55248e-05	0	1	6	1	Q92552-2	1	1659.06	High	Not Found	High	High	High	High	High	High	High	117.6		55	67	91.2	76.6	101.1	55.8	67.9	Unique	46.93	High	0	4.738e-05
FALSE	High	FVPQEMGVHTVSVK	3xTMT6plex [N-Term; S12; K14]	5.52247e-05	0	2	9	1	H7C5L4; O75369-8	0	2245.3	High	Not Found	High	High	High	High	High	High	High	315.1		95.8	61.7	132.8	242.5	91	67.9	94.2	NotUnique	34.43	High	0	5.724e-05
FALSE	High	FVPQEMGVHTVSVK	2xTMT6plex [N-Term; K14]	3.46569e-05	0	2	9	1	H7C5L4; O75369-8	0	2016.14	High	Not Found	High	High	High	High	High	High	High	173.5		121.5	57	52.2	89.5	46.4	23.7	45.9	NotUnique	35.85	High	0	3.631e-05
FALSE	High	IAVGSDADLVIWDPDSVK	2xTMT6plex [N-Term; K18]	1.31232e-05	0	1	3	2	A0A1C7CYX9	0	2358.3	High	Not Found	High	High	High	High	High	High	High	292.8		320.1	110.8	155.2	375.3	143.7	111.4	132.2	Unique	51.46	High	0	1.402e-05
FALSE	High	SQLEGLEESVR	1xTMT6plex [N-Term]	0.000129603	0	1	1	1	O15031	0	1475.79	High	Not Found	High	High	High	High	High	High	High	57.5		9.3	18.3	28.7	14.5	25.6	17.2	9.3	Unique	51.62	High	0	0.0001318
FALSE	High	LQNELDNVSTLLEEAEKK	3xTMT6plex [N-Term; K17; K18]	0.000108103	0	1	5	1	P35580-3	1	2760.56	High	Not Found	High	High	High	High	High	High	High	23.9		18.9	18.7	31.8	44.5	49.6	24	24.6	Unique	56.66	High	0	0.0001102
FALSE	High	SIYPTLEIDIEGELQK	2xTMT6plex [N-Term; K16]	6.2968e-06	0	1	1	1	P30520	0	2306.29	High	Not Found	High	High	High	High	High	High	High	97.2		53.4	40	37.6	82.3	31.5	20.9	26.2	Unique	79.73	High	0	6.866e-06
FALSE	High	EGINIFLDGYVPTENLR	1xTMT6plex [N-Term]	1.74283e-08	0	1	2	2	P61221	0	2179.16	High	High	High	High	High	High	High	High	High	151.5	10.7	52.8	76.3	82.5	63.3	94.1	63.6	50.1	Unique	59.75	High	0	2.205e-08
FALSE	High	SNEYQLIDCAQYFLDK	2xTMT6plex [N-Term; K16]; 1xCarbamidomethyl [C9]	5.46527e-06	0	4	8	1	P63092-2; P63092; P63092-3; P63092-4	0	2465.24	High	Not Found	High	High	High	High	High	High	High	344.3		155.4	106.4	79.6	171.7	79.8	73	153.8	NotUnique	41.3	High	0	5.962e-06
FALSE	High	ARNDEYENLFNMIVEIPR	1xTMT6plex [N-Term]	2.41962e-07	0	1	6	1	Q9H2U2-2	1	2452.25	High	Not Found	High	High	High	High	High	High	High	2.8		11.7	8	24.2	21.2	19.5	6	9.8	Unique	80.13	High	0	2.858e-07
FALSE	High	TAPGALTAKPPLAPKPGTTVASGVTAR	3xTMT6plex [N-Term; K9; K15]	8.25738e-05	0	1	1	1	Q4KMP7	0	3217.92	High	Not Found	High	High	High	High	High	High	High	28		17.8	14.5	22.7	26.1	22.2	14.8	13.4	Unique	36.4	High	0	8.455e-05
FALSE	High	ETLQALDMPVLPVTATEIR	1xTMT6plex [N-Term]	0.00013647	0	1	3	1	Q96RR1	0	2326.29	High	Not Found	High	High	High	High	High	High	High	18.4		6.2	3.7	13.4	11.6	19.4	12.6	9	Unique	54.17	High	0	0.0001381
FALSE	High	NGQHFIIPQMADSSLDLSELAK	2xTMT6plex [N-Term; K22]; 1xDeamidated [Q/N]	8.50483e-09	0	1	12	3	Q14161	0	2873.51	High	Not Found	High	High	High	High	High	High	High	42.8		40.1	24.7	25.6	44.1	22.5	19	24.4	Unique	91.69	High	0	1.092e-08
FALSE	High	LSDETLIDIMTR	1xTMT6plex [N-Term]	3.00993e-05	0	1	7	2	P19367	0	1635.88	High	High	High	High	High	High	High	High	High	229.6	5.8	101.4	99.5	148.6	153	143	89.3	116.7	Unique	66.5	High	0	3.171e-05
FALSE	High	GIPIEVIPMAYVPVSR	1xTMT6plex [N-Term]	2.17162e-05	0	1	1	1	P49247	0	1970.13	High	High	High	High	High	High	High	High	High	58.2	14.7	55.3	64	82.9	79.4	85.7	72.5	62.9	Unique	47.53	High	0	2.3e-05
FALSE	High	EYNEFAEVFLK	2xTMT6plex [N-Term; K11]	0.000142459	0	1	1	1	O95373	0	1847	High	Not Found	High	High	High	High	High	High	High	294.3		92.9	111.7	89.1	115.2	77.4	69.8	62.5	Unique	34.21	High	0	0.0001448
FALSE	High	QLLGHMEDLEGDAQSVLDAR	1xTMT6plex [N-Term]	2.0433e-09	0	1	1	2	Q9NX46	0	2426.22	High	High	High	High	High	High	High	High	High	121.6	5.8	74.7	63	73.1	102.5	64.1	47.8	45.6	Unique	88.12	High	0	9.726e-09
FALSE	High	SLGDDISSETSGDFR	1xTMT6plex [N-Term]	3.83511e-07	0	1	3	1	P12429	0	1814.86	High	Not Found	High	High	High	High	High	High	High	40.7		35.1	10.8	7.1	34.7	12.4	1.4	16.6	Unique	81.88	High	0	4.506e-07
FALSE	High	VSALDLAVLDQVEAR	1xTMT6plex [N-Term]	1.66841e-06	0	1	5	2	Q13561-2	0	1828.04	High	High	High	High	High	High	High	High	High	250.2	13.2	184	90.5	157.2	218.1	102.5	68.6	93.8	Unique	67.41	High	0	1.917e-06
FALSE	High	KYYKVEPLDFGGTQK	4xTMT6plex [N-Term; K1; K4; K15]	4.88395e-05	0	1	4	1	P07686	2	2689.57	High	Not Found	High	High	High	High	High	High	High	50.5		73.8	68	372.4	122.3	266.1	150.5	47.2	Unique	24.28	High	0	5.06e-05
FALSE	High	LGHVVMGNNAVSPYQQVIEK	3xTMT6plex [N-Term; S12; K20]	8.58374e-08	0	1	3	1	P60228	0	2870.62	High	Not Found	High	High	High	High	High	High	High	357.7		70.4	68.7	193.8	185.5	175.3	115.4	120	Unique	60.83	High	0	1.042e-07
FALSE	High	LGHVVMGNNAVSPYQQVIEK	2xTMT6plex [N-Term; K20]	7.44952e-08	0	1	3	1	P60228	0	2641.45	High	Not Found	High	High	High	High	High	High	High	131.1		56.8	51.1	52	49.1	47.3	31.8	36.5	Unique	72.24	High	0	9.092e-08
FALSE	High	CWGVDFQLGSDVPDPGMVNEGTK	2xTMT6plex [N-Term; K23]; 1xCarbamidomethyl [C1]	4.73999e-09	0	1	4	1	Q13443	0	2966.44	High	Not Found	High	High	High	High	High	High	High	135.1		16.2	24.5	56.7	19.9	60.1	27.6	14.1	Unique	69.3	High	0	6.179e-09
FALSE	High	EEGPYEVEVTYDGVPVPGSPFPLEAVAPTKPSK	3xTMT6plex [N-Term; K30; K33]	3.35797e-07	0	2	5	1	P21333-2; Q60FE5	0	4173.23	High	Not Found	High	High	High	High	High	High	High	120.1		97.1	42.6	53.3	92.7	41.8	31.3	45.5	NotUnique	81.46	High	0	3.931e-07
FALSE	High	HTDNVIQWLNAMDEIGLPK	2xTMT6plex [N-Term; K19]	3.22983e-05	0	1	2	2	P46940	0	2652.42	High	Not Found	High	High	High	High	High	High	High	111.5		89.8	113.9	204.2	119.5	144.7	148.5	118.1	Unique	56.03	High	0	3.39e-05
FALSE	High	AQGPDGGLTASTYSYLGGFDSSSNVLAGQLR	1xTMT6plex [N-Term]	2.86359e-06	0	1	5	1	Q6XQN6-2	0	3318.64	High	Not Found	Not Found	Not Found	Not Found	Not Found	Not Found	Not Found	Not Found	2.3									Unique	79.87	High	0	3.199e-06
FALSE	High	SDFSWAAGQGYCQGGFSAEFTK	2xTMT6plex [N-Term; K22]; 1xCarbamidomethyl [C12]	1.2665e-09	0	1	1	2	P08648	0	2859.34	High	High	High	High	High	High	High	High	High	344.4	1.1	47	124.9	254.3	48.5	167.7	81.2	35.3	Unique	80.95	High	0	3.009e-09
FALSE	High	NVEQDELQQVIR	1xTMT6plex [N-Term]	6.63784e-05	0	1	6	1	P28290	0	1699.92	High	High	High	High	High	High	High	High	High	78.2	2.6	40.1	27.9	62	64.9	61.9	46	58.1	Unique	47.4	High	0	6.857e-05
FALSE	High	GARPPAAGPGGDEDEDEEDTAPESALDTSLDK	2xTMT6plex [N-Term; K32]	5.13688e-06	0	1	3	1	Q27J81	0	3670.72	High	High	High	High	High	High	High	High	High	52	1.3	30.7	34.2	28.6	38.5	33.6	19.3	21.2	Unique	67.38	High	0	5.617e-06
FALSE	High	KMNLGVGAYRDDNGKPYVLPSVR	3xTMT6plex [N-Term; K1; K15]	2.85484e-05	0	1	2	1	P00505	2	3236.82	High	Not Found	High	High	High	High	High	High	High	39.3		42.6	19.7	157.6	90.6	130.5	45.5	36.9	Unique	26.77	High	0	2.989e-05
FALSE	High	EGPGSEPDSQVDGGLSGASLGEK	2xTMT6plex [N-Term; K23]	8.77651e-05	0	1	2	1	Q5JSZ5	0	2631.31	High	Not Found	High	High	High	High	High	High	High	28.4		16.4	13.2	23.2	12	21	14.7	10.1	Unique	50.26	High	0	8.966e-05
FALSE	High	STNINFYEISSDGNVPSIVHSFEDVGPK	2xTMT6plex [N-Term; K28]	8.65934e-06	0	1	1	2	P17301	0	3510.78	High	Not Found	High	High	High	High	High	High	High	96.7		67.2	85.7	80.5	35.9	62.9	49.7	26.9	Unique	40.31	High	0	2.656e-05
FALSE	High	TVLSNVQEELDR	1xTMT6plex [N-Term]	2.17162e-05	0	1	3	2	O43237	0	1631.88	High	High	High	High	High	High	High	High	High	88.8	3.3	40.3	29.5	60.3	48.7	41.6	28.5	33.4	Unique	88.52	High	0	2.292e-05
FALSE	High	KHVNPVQALSEFK	3xTMT6plex [N-Term; K1; K13]	3.75152e-05	0	1	4	1	P35221	1	2184.31	High	Not Found	High	High	High	High	High	High	High	335.5		80.7	162.8	239.4	91	268.2	135.9	59.1	Unique	25.42	High	0	3.927e-05
FALSE	High	STNINFYEISSDGNVPSIVHSFEDVGPK	3xTMT6plex [N-Term; S17; K28]	1.2346e-06	0	1	1	2	P17301	0	3739.94	High	Not Found	High	High	High	High	High	High	High	62.4		20	23.4	61	35	48.8	36.9	20.2	Unique	50.16	High	0	1.403e-06
FALSE	High	VQTDPPSVPICDLYPNGVFPK	2xTMT6plex [N-Term; K21]; 1xCarbamidomethyl [C11]	2.19087e-05	0	2	8	1	F8VQZ7; P50579	0	2801.49	High	Not Found	High	High	High	High	High	High	High	59.5		37.2	36.6	41	42.3	49.2	32	39	NotUnique	33.4	High	0	2.326e-05
FALSE	High	VQTDPPSVPICDLYPNGVFPK	2xTMT6plex [N-Term; K21]; 1xDeamidated [N16]; 1xCarbamidomethyl [C11]	1.05267e-06	0	2	8	2	F8VQZ7; P50579	0	2802.48	High	High	High	High	High	High	High	High	High	252.1	2.6	158.8	149.3	197.7	180.9	177.7	132.2	146.1	NotUnique	57.76	High	0	1.204e-06
FALSE	High	NLPPSGAVPVTGIPPHVVK	2xTMT6plex [N-Term; K19]	1.59615e-06	0	1	1	6	Q13283	0	2337.41	High	Not Found	High	High	High	High	High	High	High	230.4		183.1	118.4	452.7	306.9	568	325.7	209.1	Unique	62.07	High	0	2.957e-06
FALSE	High	EAQNDLEQVLR	1xTMT6plex [N-Term]	7.58295e-06	0	1	1	1	Q15075	0	1543.83	High	High	High	High	High	High	High	High	High	153.4	6.2	118	75.3	98.4	87.3	97.6	18	59.3	Unique	81.33	High	0	8.203e-06
FALSE	High	QLELMQDQGALEQLCHSVMEAHPQVVMDVK	2xTMT6plex [N-Term; K30]; 1xDeamidated [Q]; 1xCarbamidomethyl [C15]	4.3382e-09	0	1	2	2	O75879	0	3922.96	High	Not Found	High	High	High	High	High	High	High	43.8		14.4	21.4	28.1	28.8	31.3	19	28.4	Unique	74.84	High	0	5.709e-09
FALSE	High	SEVEEVDFAGWLCK	2xTMT6plex [N-Term; K14]; 1xCarbamidomethyl [C13]	0.000125212	0	1	3	1	P36507	0	2127.08	High	High	High	High	High	High	High	High	High	170.1	2.5	64.5	57.9	46.3	90.5	45	30.5	42.8	Unique	34.65	High	0	0.0001277
FALSE	High	VSNGAGTMSVSLVADENPFAQGALK	2xTMT6plex [N-Term; K25]; 1xDeamidated [N3]	3.29945e-06	0	2	6	2	P06396-2; P06396	0	2922.53	High	Not Found	High	High	High	High	High	High	High	36		32.1	16.8	21	38.2	23.7	10.8	20.7	NotUnique	74.16	High	0	3.655e-06
FALSE	High	DFTSLENTVEER	1xTMT6plex [N-Term]	3.76811e-06	0	1	1	1	Q07065	0	1668.83	High	Not Found	High	High	High	High	High	High	High	115.8		24.7	35	48.1	21.7	36.7	19.4	17.1	Unique	77.98	High	0	4.177e-06
FALSE	High	ENQEGAANVNVR	1xTMT6plex [N-Term]	2.25462e-06	0	1	1	1	Q8N0X7	0	1529.79	High	High	High	High	High	High	High	High	High	68.6	1.1	25.9	24.4	14.5	40.5	29	11.3	24.6	Unique	85.17	High	0	2.523e-06
FALSE	High	CEFEEVQGFLDQVAHK	2xTMT6plex [N-Term; K16]; 1xCarbamidomethyl [C1]	2.66625e-08	0	1	2	1	Q9NX20	0	2394.22	High	Not Found	High	High	High	High	High	High	High	141.1		40.1	42.1	90.7	94	74	55.1	79.4	Unique	79.31	High	0	3.34e-08
FALSE	High	TELLFDTIDSSEVNVAK	2xTMT6plex [N-Term; K17]	4.6332e-05	0	1	5	1	Q53R41	0	2339.27	High	Not Found	High	High	High	High	High	High	High	45.3		16.6	11.5	18	25.5	22.2	14.9	21.3	Unique	52.6	High	0	4.826e-05
FALSE	High	AALEDTLAETEAR	1xTMT6plex [N-Term]	7.65273e-07	0	1	2	2	P08727	0	1618.85	High	High	High	High	High	High	High	High	High	108	10.7	102.9	52	64	121.8	32.2	17	38.7	Unique	88.97	High	0	8.8e-07
FALSE	High	LEESSTIGQDQTLMER	1xTMT6plex [N-Term]	3.43529e-05	0	1	5	1	Q96SB4	0	2066.03	High	High	High	High	High	High	High	High	High	86.1	8.4	48.2	55.4	69.4	48.5	81	52	43.1	Unique	48.53	High	0	3.592e-05
FALSE	High	GVDDLDFFIGDEAIEKPTYATK	3xTMT6plex [N-Term; K16; K22]	9.79974e-09	0	1	3	3	P61158	0	3131.68	High	Not Found	High	High	High	High	High	High	High	222.2		229	209.8	248.2	271.7	339.6	233.9	181.5	Unique	63.39	High	0	1.255e-08
FALSE	High	LNVDEAFEQLVR	1xTMT6plex [N-Term]	1.07148e-06	0	1	1	2	P10301	0	1661.91	High	High	High	High	High	High	High	High	High	186	8.8	146.1	95.4	110.8	149.5	85.5	68	117.8	Unique	101.04	High	0	1.222e-06
FALSE	High	EVTDMNLNVINEGGIDKLGEYMEK	3xTMT6plex [N-Term; K17; K24]	1.93828e-08	0	1	2	1	Q96TA1	1	3398.78	High	High	High	High	High	High	High	High	High	33.1	1.2	71.8	48.8	83.7	119	86.1	56.9	29.6	Unique	53.64	High	0	2.437e-08
FALSE	High	AQLTLLGTEMDYVEDK	2xTMT6plex [N-Term; K16]	6.29784e-07	0	1	3	1	Q9BUE6-2	0	2284.21	High	Not Found	High	High	High	High	High	High	High	91.2		29.4	33.4	41.2	41.9	49.5	34.2	39.4	Unique	45.89	High	0	7.256e-07
FALSE	High	THLPTIESAIHSVLR	1xTMT6plex [N-Term]	0.000137648	0	1	1	1	Q70UQ0-4	0	1903.1	High	High	High	High	High	High	High	High	High	62.5	3.1	25.8	25.9	27.9	13.7	28	14.1	16.2	Unique	36.97	High	0	0.0001401
FALSE	High	LQVEHPVTEMITGTDLVEWQLR	1xTMT6plex [N-Term]	3.26992e-07	0	1	5	2	Q96RQ3	0	2823.49	High	High	High	High	High	High	High	High	High	93.7	5	70	59.5	101.9	121.2	81	50.3	88.8	Unique	99.66	High	0	1.211e-06
FALSE	High	DLGGIVLANACGPCIGQWDR	1xTMT6plex [N-Term]; 2xCarbamidomethyl [C11; C14]	2.93911e-08	0	1	2	1	A2A274	0	2401.2	High	High	High	High	High	High	High	High	High	77.2	1.5	39.1	57.4	80.7	52.7	39.2	35.3	48.6	Unique	59.8	High	0	3.657e-08
FALSE	High	KNPASLPLTQAALK	3xTMT6plex [N-Term; K1; K14]	2.13744e-07	0	1	5	1	Q13428-4	1	2139.35	High	Not Found	High	High	High	High	High	High	High	109.2		19.1	90.3	55.7	71	67.9	49.4	56.7	Unique	62.97	High	0	2.53e-07
FALSE	High	EIEELKQELIQAEIQNGVK	3xTMT6plex [N-Term; K6; K19]; 1xDeamidated [Q/N]	8.5805e-09	0	1	3	5	Q12904-2	1	2899.66	High	Not Found	High	High	High	High	High	High	High	320.3		298.2	150.7	205.7	254	201.1	133.1	170.6	Unique	76.59	High	0	1.103e-08
FALSE	High	LPDNVTFEEGALIEPLSVGIHACR	1xTMT6plex [N-Term]; 1xCarbamidomethyl [C23]	3.63529e-08	0	1	2	2	Q00796	0	2866.5	High	High	High	High	High	High	High	High	High	28.6	7	34.1	28.4	13	22.4	46.6	15.3	8.9	Unique	67.32	High	0	4.529e-08
FALSE	High	GSSGCSEAGGAGHEEGR	1xTMT6plex [N-Term]; 1xCarbamidomethyl [C5]	2.78802e-07	0	1	1	4	Q9C0C9	0	1833.8	High	Not Found	High	Not Found	High	High	Not Found	Not Found	Not Found	8.8		1.2		1.2	1.8				Unique	61.09	High	0	1.567e-06
FALSE	High	LPDNVTFEEGALIEPLSVGIHACR	2xTMT6plex [N-Term; S17]; 1xCarbamidomethyl [C23]	5.71318e-07	0	1	2	1	Q00796	0	3095.66	High	Not Found	High	High	High	High	High	High	High	76.2		47.3	43.4	70.7	88.5	164.4	83.3	42.2	Unique	61.87	High	0	6.611e-07
FALSE	High	SLKELDQGTPQYMENMEQVFEQCQQFEEK	3xTMT6plex [N-Term; K3; K29]; 1xCarbamidomethyl [C23]	5.7576e-10	0	1	3	1	Q9UNF0	1	4281.08	High	Not Found	High	High	High	High	High	High	High	12.9		35.1	21.6	47.4	59.5	51.9	34.4	18.5	Unique	104.8	High	0	7.935e-10
FALSE	High	SNTGGQAFPQCVFDHWQILPGDPFDNSSRPSQVVAETR	1xTMT6plex [N-Term]; 1xCarbamidomethyl [C11]	8.21189e-08	0	1	1	7	P13639	0	4474.15	High	Not Found	High	High	High	High	High	High	High	170.1		67.9	64.1	155.8	147.5	226.9	118.5	103.2	Unique	78.85	High	0	9.98e-08
FALSE	High	DDGLFSGDPNWFPK	2xTMT6plex [N-Term; K14]	5.66226e-06	0	1	3	3	P37802-2	0	2053.04	High	Not Found	High	High	High	High	High	High	High	1072.8		630.3	291	406.6	940.9	332.8	265.6	291.6	Unique	41.28	High	0	6.356e-05
FALSE	High	EDPGPGAGPSMAETEALSK	2xTMT6plex [N-Term; K19]	1.54015e-07	0	1	1	1	Q9BUP3-3	0	2302.16	High	Not Found	High	High	High	High	High	High	High	123.5		61.4	54.3	66.1	69.1	76.1	44	54.7	Unique	42.83	High	0	1.839e-07
FALSE	High	SAIVHLINYQDDAELATR	1xTMT6plex [N-Term]	8.81489e-08	0	1	5	1	P14923	0	2258.2	High	High	High	High	High	High	High	High	High	102.5	9.5	55.8	128.8	82.2	36.8	118.9	68.2	19.8	Unique	87.87	High	0	1.075e-07
FALSE	High	IVLNPNKPVVEWHR	2xTMT6plex [N-Term; K7]	6.18892e-05	0	1	4	1	Q9BRR6	0	2159.29	High	High	High	High	High	High	High	High	High	194.8	5.2	75.3	93	124	70.6	141.3	72.7	53.7	Unique	34.75	High	0	6.396e-05
FALSE	High	SNTGGQAFPQCVFDHWQILPGDPFDNSSRPSQVVAETR	1xTMT6plex [N-Term]; 1xDeamidated [Q/N]; 1xCarbamidomethyl [C11]	5.81464e-06	0	1	1	3	P13639	0	4475.13	High	Not Found	High	High	High	High	High	High	High	27.6		11.8	7.4	28.8	28.4	44.2	17.6	15.8	Unique	56.57	High	0	6.341e-06
FALSE	High	SNTGGQAFPQCVFDHWQILPGDPFDNSSRPSQVVAETR	1xTMT6plex [N-Term]; 2xDeamidated [Q/N]; 1xCarbamidomethyl [C11]	1.09957e-05	0	1	1	8	P13639	0	4476.12	High	Not Found	High	High	High	High	High	High	High	8.2		3.2	2.2	9.3	8.4	6.4	6.9	5.6	Unique	54.19	High	0	1.181e-05
FALSE	High	YGSGSGQQSVTGVEASDDANSYWR	1xTMT6plex [N-Term]	6.6958e-09	0	1	1	2	Q9HCN8	0	2750.25	High	Not Found	High	High	High	High	High	High	High	14.8		3.2	1.5	4.7	2	11.3	5	6.7	Unique	78.2	High	0	8.694e-09
FALSE	High	SNTGGQAFPQCVFDHWQILPGDPFDNSSRPSQVVAETR	2xTMT6plex [N-Term; S/T]; 1xCarbamidomethyl [C11]	1.30199e-06	0	1	1	7	P13639	0	4703.31	High	Not Found	High	High	High	High	High	High	High	127.2		33.7	25	138.3	130.9	178.3	100.6	84.6	Unique	36.43	High	0	2.374e-05
FALSE	High	QEVMISDLEER	1xTMT6plex [N-Term]	8.21159e-06	0	1	5	1	P35580-3	0	1577.8	High	High	High	High	High	High	High	High	High	43.8	1.3	10.4	16.7	13.5	23.6	25.7	13	18.1	Unique	73.48	High	0	8.905e-06
FALSE	High	SEPVKEESSELEQPFAQDTSSVGPDR	2xTMT6plex [N-Term; K5]	2.15401e-10	0	2	5	1	Q15424-3; Q14151	1	3306.64	High	Not Found	High	High	High	High	High	High	High	141.2		15.7	81.6	40.7	65	46.8	33.8	50.3	NotUnique	118.92	High	0	3.034e-10
FALSE	High	KFFVSCNVQSVDEK	3xTMT6plex [N-Term; K1; K14]; 1xCarbamidomethyl [C6]	1.62467e-06	0	1	1	1	Q5T1C6	1	2374.3	High	Not Found	High	High	High	High	High	High	High	72		32.9	37.1	56.2	51.5	47.7	35.2	45.6	Unique	63.2	High	0	1.826e-06
FALSE	High	RTDEDAVLMDGMTESDTASVNENGLGKR	2xTMT6plex [N-Term; K27]; 1xDeamidated [N]	3.81815e-05	0	1	3	2	P51114-2	2	3470.68	Not Found	Not Found	High	High	High	High	High	High	High			1.2	1.9	7.1	3.3	3.2	3.1	1.8	Unique	47.28	High	0	3.967e-05
FALSE	High	LQELEGTYEENER	1xTMT6plex [N-Term]	0.000102625	0	1	1	1	P55268	0	1838.9	High	Not Found	High	High	High	High	High	High	High	46.7		3.5	18.6	36.3	8.4	36.5	21.5	7.1	Unique	36.15	High	0	0.0001049
FALSE	High	IGIIGGTGLDDPEILEGR	1xTMT6plex [N-Term]	7.58525e-07	0	1	11	1	Q13126-2	0	2054.13	High	Not Found	High	High	High	High	High	High	High	22.6		23.3	10.1	12.5	29.3	14.5	8.8	15	Unique	50.35	High	0	8.718e-07
FALSE	High	ADFFEDENGQR	1xTMT6plex [N-Term]; 1xDeamidated [N8]	0.000147431	0	1	1	1	O95573	0	1557.7	High	Not Found	High	High	High	High	High	High	High	32.8		10.2	14.8	15.2	17	19.6	8.1	16.2	Unique	54.15	High	0	0.0001499
FALSE	High	ADFFEDENGQR	1xTMT6plex [N-Term]	9.40899e-05	0	1	1	2	O95573	0	1556.72	High	High	High	High	High	High	High	High	High	308.6	9	103	120.2	108.3	135.5	161.6	87.4	108.3	Unique	66.18	High	2.047e-05	0.0001561
FALSE	High	SAIVHLINYQDDAELATR	2xTMT6plex [N-Term; S1]	4.82654e-08	0	1	5	1	P14923	0	2487.36	High	Not Found	High	High	High	High	High	High	High	57.6		13.8	20.5	73.4	27.1	103.6	61.3	18.5	Unique	29.74	High	0	5.932e-08
FALSE	High	VAEDGETREETLLQESASK	2xTMT6plex [N-Term; K19]	0.000118893	0	1	4	1	Q96G01	1	2550.33	High	Not Found	High	High	High	High	High	High	High	7.7		1.1	1.1	6.3	6.4	10	3	3.3	Unique	34.55	High	0	0.0001208
FALSE	High	LPGDIQVVPIGVGPNANVQELER	1xTMT6plex [N-Term]	8.58374e-08	0	1	1	2	P04275	0	2643.47	High	High	High	High	High	High	High	High	High	147.5	8.7	30.7	81.2	160	33.6	126.2	72.3	11	Unique	76.95	High	0	1.042e-07
FALSE	High	SLQTLALETEWELR	1xTMT6plex [N-Term]	2.2299e-05	0	1	4	2	Q8N766	0	1918.05	High	High	High	High	High	High	High	High	High	156.7	4.2	34	58.9	90.8	61.3	113	57.1	43.5	Unique	48.33	High	0	2.363e-05
FALSE	High	SHVEDGDIAGAPASSPEAPPAEQDPVQLK	3xTMT6plex [N-Term; S15; K29]	6.29563e-08	0	2	7	1	Q9P2E9; Q9P2E9-2	0	3599.88	High	Not Found	High	High	High	High	High	High	High	123.6		22.8	39.8	95.5	77.5	90.2	51.8	68.5	NotUnique	78.14	High	0	7.737e-08
FALSE	High	SHVEDGDIAGAPASSPEAPPAEQDPVQLK	2xTMT6plex [N-Term; K29]	1.33664e-07	0	2	7	4	Q9P2E9; Q9P2E9-2	0	3370.72	High	Not Found	High	High	High	High	High	High	High	221.6		84.7	81.2	184.3	146.4	195.2	107.1	144	NotUnique	82.28	High	0	1.61e-07
FALSE	High	VLMASVQGSK	2xTMT6plex [N-Term; K10]	0.000137648	0	1	3	1	Q9Y251	0	1477.88	High	Not Found	High	High	High	High	High	High	High	68.8		2.1	37.4	88.1	29.1	51.4	25.5	10.2	Unique	42.15	High	0	0.0001397
FALSE	High	EIEAFDSESMR	1xTMT6plex [N-Term]	0.000113865	0	1	2	1	Q7L7X3	0	1542.73	High	High	High	High	High	High	High	High	High	36.3	1.6	25.8	26.4	29.3	27.9	42	21.5	18.5	Unique	57.96	High	0	0.0001159
FALSE	High	EVEAVIPDHCIFASNTSALPISEIAAVSK	2xTMT6plex [N-Term; K29]; 1xCarbamidomethyl [C10]	1.11794e-11	0	1	1	3	P40939	0	3526.89	High	High	High	High	High	High	High	High	High	476.3	1.5	283.6	280.7	275.5	297.7	210.6	143.7	253.4	Unique	114.38	High	0	1.705e-11
FALSE	High	VDAYDRPELSLGSYEFLATVDYCK	2xTMT6plex [N-Term; K24]; 1xCarbamidomethyl [C23]	3.41799e-07	0	1	2	1	P53992	0	3269.64	High	Not Found	High	High	High	High	High	High	High	53.5		25.1	35.2	37.9	25.8	40.7	20.9	19.1	Unique	78.18	High	0	4.016e-07
FALSE	High	IYSHDGTDSPPDADEVVIVLNNFK	2xTMT6plex [N-Term; K24]	4.29995e-09	0	1	2	3	Q9NYU2	0	3103.6	High	Not Found	High	High	High	High	High	High	High	318.9		127.9	168.9	213.3	126.1	208.9	101.6	91.2	Unique	90.75	High	0	5.661e-09
FALSE	High	TYFPHFDLSHGSAQVK	3xTMT6plex [N-Term; S12; K16]	3.11796e-05	0	2	2	1	P69905; G3V1N2	0	2521.38	High	Not Found	High	High	High	High	High	High	High	487.4		210.7	41.6	160.8	166	45.8	54.4	107	NotUnique	25.46	High	0	3.258e-05
FALSE	High	TYFPHFDLSHGSAQVK	2xTMT6plex [N-Term; K16]	2.62092e-06	0	2	2	1	P69905; G3V1N2	0	2292.22	High	Not Found	High	High	High	High	High	High	High	515.8		250.6	75.7	313	222.9	234	146.7	157.2	NotUnique	41.17	High	0	2.933e-06
FALSE	High	ACTEAEFACHSYNECVALEYR	1xTMT6plex [N-Term]; 3xCarbamidomethyl [C2; C9; C15]	1.80636e-07	0	1	1	1	P98160	0	2809.22	High	Not Found	High	High	High	High	High	High	High	28.5		13.4	23.6	22.1	14.1	17.1	11.8	16.7	Unique	58.58	High	0	2.164e-07
FALSE	High	ELEEEVNNFQK	2xTMT6plex [N-Term; K11]; 1xDeamidated [N7]	5.4171e-06	0	1	6	1	Q9NVA2-2	0	1837.96	High	Not Found	High	High	High	High	High	High	High	105.3		53.2	51.3	45.2	66.6	40.5	29.8	44.8	Unique	75.58	High	0	5.931e-06
FALSE	High	ELEEEVNNFQK	2xTMT6plex [N-Term; K11]	2.17162e-05	0	1	6	1	Q9NVA2-2	0	1836.97	High	Not Found	High	High	High	High	High	High	High	134.7		73.9	54.5	64.3	83.6	61.4	46.7	56.2	Unique	46.29	High	0	2.303e-05
FALSE	High	AVEGCVSASQAATEDGQLLR	1xTMT6plex [N-Term]; 1xCarbamidomethyl [C5]	1.16946e-09	0	1	1	2	Q9Y490	0	2291.15	High	High	High	High	High	High	High	High	High	89.7	9.2	77.2	44.7	37	69.2	36.7	24.5	38	Unique	124.61	High	0	1.59e-09
FALSE	High	VAGESAEPEPEPEADYYAK	2xTMT6plex [N-Term; K19]	6.2423e-07	0	1	1	1	P01137	0	2510.23	High	Not Found	High	High	High	High	High	High	High	170.2		20.4	84.4	125	36.8	175	106.2	13.8	Unique	49.17	High	0	7.204e-07
FALSE	High	EVEELMEDTQHK	2xTMT6plex [N-Term; K12]	1.12996e-06	0	1	5	2	F6SYF8	0	1945.99	High	High	High	High	High	High	High	High	High	332.1	2.1	42.9	139	262.7	25.3	166.3	88.1	12.1	Unique	51.33	High	0	1.286e-06
FALSE	High	QSATSATSSK	2xTMT6plex [N-Term; K10]	3.22983e-05	0	2	10	2	Q14571; Q14643	0	1425.79	High	Not Found	High	High	High	High	High	High	High	220.5		91.1	114.7	147.8	167.2	133.1	71.7	131	NotUnique	68.06	High	0	3.382e-05
FALSE	High	VFNTTPDDLDLHVIYDVSHNIAK	2xTMT6plex [N-Term; K23]	7.92303e-09	0	1	1	2	Q9Y3I0	0	3084.64	High	High	High	High	High	High	High	High	High	75.4		44.6	39.3	54.9	44.6	64.4	44.9	35.3	Unique	64.37	High	0	1.026e-08
FALSE	High	YLIATSEQPIAALHR	1xTMT6plex [N-Term]	1.14979e-07	0	2	2	2	Q5T5C7; P49591	0	1912.09	High	High	High	High	High	High	High	High	High	240.5	11.8	113.3	110.4	71.1	92.3	60.7	77.6	108.7	NotUnique	55.55	High	0	1.387e-07
FALSE	High	DILKPEIMEEIVMETR	2xTMT6plex [N-Term; K4]	0.000140033	0	1	4	2	Q13868	0	2404.32	High	Not Found	High	High	High	High	High	High	High	97.1		29.7	47.6	30.9	50.1	35.7	32.6	40	Unique	39.29	High	0	0.0001424
FALSE	High	DGVPEGQLPQILHYELLAIR	1xTMT6plex [N-Term]	4.45843e-06	0	1	2	1	Q9UL18	0	2490.39	High	Not Found	High	High	High	High	High	High	High	12.7		10.3	8.6	8.9	10.7	10.5	5.8	8.9	Unique	41.86	High	0	4.923e-06
FALSE	High	AKFYPEDVSEELIQDITQR	2xTMT6plex [N-Term; K2]	4.0399e-10	0	1	2	4	P26038	1	2739.46	High	High	High	High	High	High	High	High	High	108.5	12.3	455	208.9	557	515.2	546.6	320.1	226	Unique	126.97	High	0	5.61e-10
FALSE	High	SGYQDMPEYENFR	1xTMT6plex [N-Term]	6.0242e-06	0	1	3	1	Q15436	0	1864.84	High	High	High	High	High	High	High	High	High	171.6	1.1	66.2	46.6	89.8	72.5	77.4	58.5	45.4	Unique	89.96	High	0	6.596e-06
FALSE	High	SCFEYTANPAGYNPSISIVGTLEAEK	2xTMT6plex [N-Term; K26]; 1xCarbamidomethyl [C2]	1.04339e-06	0	2	8	1	P23229-6; P23229	0	3276.65	High	Not Found	High	High	High	High	High	High	High	110.3		11.9	23.4	24.1	7	37.8	20.2	12.9	NotUnique	59.59	High	0	1.192e-06
FALSE	High	SLETEILESLK	2xTMT6plex [N-Term; K11]	1.21192e-05	0	1	1	1	P48681	0	1720.01	High	Not Found	High	High	High	High	High	High	High	258.5		156	131.7	173.6	280.6	184.1	80.4	119.4	Unique	65.65	High	0	1.304e-05
FALSE	High	TTYQALPCLPSMYGYPNR	1xTMT6plex [N-Term]; 1xCarbamidomethyl [C8]	7.71836e-06	0	1	2	1	P53621	0	2361.16	High	High	High	High	High	High	High	High	High	273.2	4	93.7	66.3	116.1	184.4	102.5	81.1	104.8	Unique	37.56	High	0	8.381e-06
FALSE	High	YDPPLEDGAMPSAR	1xTMT6plex [N-Term]	3.60493e-06	0	1	5	1	B1AK88	0	1747.85	High	High	High	High	High	High	High	High	High	360.3	3.9	96.7	70.7	56.2	132.5	51.3	39.1	78.5	Unique	66.95	High	0	4.005e-06
FALSE	High	SGDTVEVQVNGNLVR	1xTMT6plex [N-Term]; 1xDeamidated [N10]	1.52542e-09	0	1	1	1	Q9Y6M5	0	1816.96	High	Not Found	High	High	High	High	High	High	High	23.7		10	9.8	6.8	17.8	11.2	11.4	13.9	Unique	121.8	High	0	2.058e-09
FALSE	High	VSDTVVEPYNATLSVHQLVENTDETYSIDNEALYDICFR	2xTMT6plex [N-Term; S14]; 1xDeamidated [N/Q]; 1xCarbamidomethyl [C37]	3.01937e-07	0	1	1	3	Q13885	0	4979.42	High	Not Found	High	High	High	High	High	High	High	20.2		6.7	8.2	2.5	8.9	6.4	2.2	5.9	Unique	19.74	High	0	4.662e-07
FALSE	High	AIDVLVADANGFTAGLR	1xTMT6plex [N-Term]; 1xDeamidated [N10]	1.88545e-05	0	1	5	1	O94964-2	0	1933.06	High	Not Found	High	High	High	High	High	High	High	18.5		7.4	7.2	7.8	10.3	11.3	6.7	8	Unique	48.44	High	0	2.005e-05
FALSE	High	IKGCWDSIHVVEVQEK	4xTMT6plex [N-Term; K2; S7; K16]; 1xCarbamidomethyl [C4]	6.63784e-05	0	1	5	1	B1AK88	1	2843.63	High	Not Found	High	High	High	High	High	High	High	23.8		34.2	16.7	53.2	81.2	44.5	28.1	32.1	Unique	12.15	High	0	6.81e-05
FALSE	High	VIQEPQSELLEPVCHQLFEFYR	1xTMT6plex [N-Term]; 1xCarbamidomethyl [C14]	1.85501e-07	0	2	4	1	Q9BYI3; Q9BYI3-3	0	2990.53	High	High	High	High	High	High	High	High	High	35.4	3.6	32	22.5	24.1	26.6	21.5	15.9	25.5	NotUnique	80.75	High	0	2.217e-07
FALSE	High	DIPNENEAQFQIR	1xTMT6plex [N-Term]	3.46569e-05	0	1	4	1	Q10567-3	0	1802.92	High	High	High	High	High	High	High	High	High	26.3	2.1	14.1	12.1	18.8	17.5	17.5	9.2	9.8	Unique	46.12	High	0	3.628e-05
FALSE	High	EAEEETTNDNGVLVLEPARK	2xTMT6plex [N-Term; K20]	5.55718e-10	0	1	2	2	P43121	1	2672.41	High	Not Found	High	High	High	High	High	High	High	43.2		52.2	53.6	131.5	64.5	146.1	72.8	24.8	Unique	73.44	High	0	7.707e-10
FALSE	High	VNPLGGAVALGHPLGCTGAR	1xTMT6plex [N-Term]; 1xCarbamidomethyl [C16]	1.16002e-07	0	1	5	1	P09110	0	2146.18	High	Not Found	High	High	High	High	High	High	High	70.1		39.1	41.5	55.6	44.5	40.5	26	23.8	Unique	73.82	High	0	1.401e-07
FALSE	High	AIAELGIYPAVDPLDSTSR	1xTMT6plex [N-Term]	1.18019e-05	0	1	2	6	P06576	0	2217.2	High	High	High	High	High	High	High	High	High	205	10.9	80.4	83.3	176.5	176.7	179.9	116.3	141.3	Unique	75.54	High	0	1.267e-05
FALSE	High	VEELEENISHLSEK	2xTMT6plex [N-Term; K14]	8.55022e-05	0	1	2	1	Q96PY5-3	0	2114.14	High	Not Found	High	High	High	High	High	High	High	27.3		24.4	18	24.4	34.6	20	13.2	21.2	Unique	39.52	High	0	8.785e-05
FALSE	High	IVDDWANDGWGLK	2xTMT6plex [N-Term; K13]	1.37304e-06	0	1	3	3	P27824-2	0	1947.04	High	High	High	High	High	High	High	High	High	1150.3	1.3	218.2	392.9	415	241.7	458.6	280.5	209.5	Unique	85.88	High	0	1.977e-06
FALSE	High	IVDDWANDGWGLK	2xTMT6plex [N-Term; K13]; 1xDeamidated [N7]	6.46742e-07	0	1	3	2	P27824-2	0	1948.02	High	High	High	High	High	High	High	High	High	551.5	1.8	125.3	211.9	216	127.2	239.5	155.4	118	Unique	81.13	High	0	7.459e-07
FALSE	High	FGVAPDHPEVK	2xTMT6plex [N-Term; K11]	5.28547e-05	0	1	16	1	P22570-7	0	1653.94	High	Not Found	High	High	High	High	High	High	High	274.3		151.4	122.9	223.7	274	160.6	102.7	187.8	Unique	48.02	High	0	5.467e-05
FALSE	High	LYCNGDGEWLVPIGR	1xTMT6plex [N-Term]; 1xDeamidated [N4]; 1xCarbamidomethyl [C3]	2.90564e-05	0	1	5	1	P29323-3	0	1978.99	High	Not Found	High	High	High	High	High	High	High	49.7		19.7	26.3	32.4	15.3	24.1	19.5	14.1	Unique	28.37	High	0	3.046e-05
FALSE	High	YLIVVRPAPPPSQK	2xTMT6plex [N-Term; K14]	2.52971e-06	0	1	5	1	D3YTG3	0	2023.25	High	Not Found	High	High	High	High	High	High	High	36.1		10.9	22.3	60.9	17.5	54.6	23	12.5	Unique	30.19	High	0	2.825e-06
FALSE	High	TSDSYGFKEEYESFFEGQSASWDVAK	3xTMT6plex [N-Term; K8; K26]	0.000118893	0	1	9	1	Q15262-3	1	3681.78	High	Not Found	High	High	High	High	High	High	High	12.5		2.2	2.1	9	2	10.8	3.6	2.3	Unique	55.01	High	0	0.0001211
FALSE	High	EDSLDSVLFLK	2xTMT6plex [N-Term; K11]	5.81464e-06	0	2	9	1	Q13620; Q13619	0	1723.99	High	Not Found	High	High	High	High	High	High	High	62.1		18	23.7	16.6	29	11.1	5.1	15.7	NotUnique	61.65	High	0	6.347e-06
FALSE	High	VLSVAVYNHYK	2xTMT6plex [N-Term; K11]	5.23929e-05	0	1	2	1	O76031	0	1751.03	High	High	High	High	High	High	High	High	High	126.6	1.2	52.2	63.1	78	83.4	84.5	55.6	68.1	Unique	33.44	High	0	5.436e-05
FALSE	High	FCPAGVYEFVPVEQGDGFR	1xTMT6plex [N-Term]; 1xCarbamidomethyl [C2]	9.91238e-05	0	1	2	1	Q16134	0	2403.16	High	High	High	High	High	High	High	High	High	134.1	3	54	52.2	82.7	87.2	59.2	38	69.5	Unique	51.43	High	0	0.0001016
FALSE	High	IQHILCTGNLCTK	2xTMT6plex [N-Term; K13]; 2xCarbamidomethyl [C6; C11]	1.97416e-06	0	1	3	1	Q9UBQ0	0	2016.11	High	Not Found	High	High	High	High	High	High	High	105.2		26.9	72.2	97.5	84.1	55	66.6	80.2	Unique	72.88	High	0	2.215e-06
FALSE	High	QFAPIHAEAPEFMEMSVEQEILVTGIK	2xTMT6plex [N-Term; K27]	2.8875e-08	0	1	3	13	P06576	0	3502.84	High	High	High	High	High	High	High	High	High	421.5	2.6	195.7	200.5	316.9	306.3	295.9	196.3	231.9	Unique	58.89	High	0	3.607e-08
FALSE	High	NDLSPASSGNAVYDFFIGR	1xTMT6plex [N-Term]	7.37196e-05	0	1	1	1	Q14739	0	2259.12	High	High	High	High	High	High	High	High	High	121.5	1.6	33.3	37.5	80.7	73.4	90.7	58.2	79.6	Unique	56.05	High	0	7.57e-05
FALSE	High	VNDGVCDCCDGTDEYNSGVICENTCK	2xTMT6plex [N-Term; K26]; 5xCarbamidomethyl [C6; C8; C9; C21; C25]	7.78391e-09	0	1	6	1	K7ELL7	0	3499.46	High	Not Found	High	High	High	High	High	High	High	123.4		21.1	40	87	37.8	64.3	47	27.2	Unique	93.66	High	0	1.004e-08
FALSE	High	YYTMHLTTLCNTSLDNPTQR	2xTMT6plex [N-Term; T]; 1xCarbamidomethyl [C10]	0.000122013	0	1	2	2	Q8N5M1	0	2887.45	High	Not Found	High	High	High	High	High	High	High	128.6		46.9	53.5	127.5	103.1	82	64.9	95.1	Unique	30.27	High	0	0.0001246
FALSE	High	VAPTVETSDPYADDPVR	1xTMT6plex [N-Term]	0.000140033	0	1	1	2	P51687	0	2061.03	High	Not Found	High	High	High	High	High	High	High	50.9		25.4	36.8	52.6	49.8	45.8	31.4	31.5	Unique	21.46	High	0	0.0001423
FALSE	High	LAQDAEVELER	1xTMT6plex [N-Term]	3.28726e-05	0	1	9	1	P26572	0	1501.81	High	High	High	High	High	High	High	High	High	305.3	7.5	34.8	131	230.8	63.6	241	117.7	49.4	Unique	72.61	High	0	3.43e-05
FALSE	High	GSQAFLVSIYNEQGIQQIGLELGR	1xTMT6plex [N-Term]	9.13582e-07	0	1	2	1	A0A087WXW9	0	2849.54	High	Not Found	High	High	High	High	High	High	Not Found	24.9		4.8	11.8	21.5	5.1	12.6	8.1		Unique	70.11	High	0	1.042e-06
FALSE	High	GTAYVVYEDIFDAK	2xTMT6plex [N-Term; K14]	4.35672e-05	0	1	1	1	Q9Y3B4	0	2049.09	High	High	High	High	High	High	High	High	High	133.4	0.9	51.5	123.1	90.8	108.6	108.7	84	76	Unique	35.85	High	0	4.526e-05
FALSE	High	RPGLEGLLAGVDNNLVELEAAR	1xTMT6plex [N-Term]	6.46272e-09	0	1	4	1	Q9BRZ2	0	2535.41	High	High	High	High	High	High	High	High	High	31.2	2.3	33.4	25.6	26.9	41.3	38.9	27.4	29.4	Unique	91.02	High	0	8.407e-09
FALSE	High	IKLHQEDNDYINASLIK	4xTMT6plex [N-Term; K2; S14; K17]	4.2433e-05	0	1	1	1	P18031	1	2930.71	High	Not Found	High	High	High	High	High	High	High	19.7		29.7	20	118.1	93.9	103.7	66	54.2	Unique	15.11	High	0	4.425e-05
FALSE	High	GLLQTEPQNNQAK	2xTMT6plex [N-Term; K13]	2.09625e-05	0	1	1	2	Q9Y3D6	0	1899.07	High	Not Found	High	High	High	High	High	High	High	432.6		261	229.5	321.9	379.3	295.9	150	228.4	Unique	45.39	High	0	2.213e-05
FALSE	High	QPLEELAAEDR	1xTMT6plex [N-Term]	4.02516e-05	0	1	4	1	Q8IVF7	0	1499.79	High	High	High	High	High	High	High	High	High	44.3	2.2	23.7	24.9	20	31.9	25.9	15.5	21.9	Unique	87.69	High	0	4.185e-05
FALSE	High	GLDIPEVDWIVQYDPPDDPKEYIHR	2xTMT6plex [N-Term; K20]	3.12873e-06	0	1	2	1	Q9NVP1	1	3467.79	High	Not Found	High	High	High	High	High	High	High	61.4		13.5	51.8	44.7	45.8	50.5	38.5	34.6	Unique	35.53	High	0	3.467e-06
FALSE	High	AAPEASSPPASPLQHLLPGK	2xTMT6plex [N-Term; K20]	7.78686e-08	0	1	2	1	Q96TA1	0	2426.38	High	High	High	High	High	High	High	High	High	85	7.5	176	123.2	33.4	67.6	29.5	17.9	26.7	Unique	70.95	High	0	9.518e-08
FALSE	High	GPPAPAPEVEELAR	1xTMT6plex [N-Term]	5.27544e-07	0	1	1	2	P48681	0	1661.91	High	High	High	High	High	High	High	High	High	194.4	48.1	123.1	78.5	88.7	176.7	105.8	39.4	59.9	Unique	74.39	High	0	6.109e-07
FALSE	High	EAEEETTNDNGVLVLEPARK	2xTMT6plex [N-Term; K20]; 2xDeamidated [N8; N10]	5.6608e-08	0	1	2	1	P43121	1	2674.38	High	Not Found	High	High	High	High	High	High	High	16.9		20.4	19.7	51.1	25.6	41.7	24.8	8.6	Unique	74.71	High	0	6.938e-08
FALSE	High	EAEEETTNDNGVLVLEPARK	2xTMT6plex [N-Term; K20]; 1xDeamidated [N10]	1.74283e-08	0	1	2	3	P43121	1	2673.4	High	High	High	High	High	High	High	High	High	127.1	1.1	185.5	196.2	433.6	209.2	417.3	237.5	87.7	Unique	87.36	High	0	2.198e-08
FALSE	High	QFAPIHAEAPEFMEMSVEQEILVTGIK	2xTMT6plex [N-Term; K27]; 1xDeamidated [Q]	5.91922e-07	0	1	3	8	P06576	0	3503.82	High	Not Found	High	High	High	High	High	High	High	21.6		1.7	5.2	12.6	8.5	8.4	5.2	9.6	Unique	76.22	High	0	6.878e-07
FALSE	High	INVNEIFYDLVR	1xTMT6plex [N-Term]	3.34569e-05	0	3	9	1	F5GZG1; P61224; P62834	0	1723.96	High	High	High	High	High	High	High	High	High	34.7	1.1	17.2	13.2	15.5	24	13.6	9.1	15.7	NotUnique	77.3	High	0	3.492e-05
FALSE	High	EEQKDFVSLYQDFENFYTR	2xTMT6plex [N-Term; K4]	2.8631e-07	0	1	2	1	O15270	1	2916.45	High	Not Found	High	High	High	High	High	High	High	142.2		85.5	91.1	87.4	100.8	104.9	75.7	122.1	Unique	78.06	High	0	3.374e-07
FALSE	High	APPPLPPVYSMETETPTAEDIQLLK	2xTMT6plex [N-Term; K25]	7.06638e-07	0	1	5	1	Q14738	0	3195.73	High	Not Found	High	High	High	High	High	High	High	32.7		13	11.4	11	18.9	12.7	10.5	10.8	Unique	75.96	High	0	8.128e-07
FALSE	High	ENLASDMYLISQMDSDQYVPITTVANLDHIK	2xTMT6plex [N-Term; K31]; 1xDeamidated [N/Q]	0.000135301	0	1	1	3	Q92615	0	3984	High	Not Found	High	High	High	High	High	High	High	18.4		6.3	6.1	9.9	9.6	9.9	3.6	9.4	Unique	45.02	High	7.07e-05	0.0003813
FALSE	High	VEVVEEDGPSEK	2xTMT6plex [N-Term; K12]	1.48523e-05	0	3	11	1	O15231-2; H7C1R1; O15231-3	0	1774.95	High	Not Found	High	High	High	High	High	High	High	90.3		72.4	44	50.9	77	33.8	21.7	38.4	NotUnique	49.63	High	0	1.592e-05
FALSE	High	MTQNIETALGVTGVEGVFR	1xTMT6plex [N-Term]	5.82077e-05	0	1	5	1	Q96Q15	0	2251.2	High	Not Found	High	High	High	High	High	High	High	17.3		8	3.4	11.5	10.5	18.5	6.4	5.6	Unique	65	High	0	6.003e-05
FALSE	High	LSDYDSSEEAIR	1xTMT6plex [N-Term]	6.1318e-06	0	1	2	1	Q6PGP7	0	1613.79	High	High	High	High	High	High	High	High	High	167.7	1.4	44.7	93.5	91.8	70.5	91.1	88.4	82.9	Unique	80.52	High	0	6.684e-06
FALSE	High	ASTNIQDTEGNTPLHLACDEER	1xTMT6plex [N-Term]; 1xCarbamidomethyl [C18]	1.42161e-08	0	1	3	1	O75832	0	2700.27	High	High	High	High	High	High	High	High	High	102.8	2.4	71.8	33.2	14.7	63.8	13.5	11.1	27.7	Unique	91.38	High	0	1.812e-08
FALSE	High	GGVSGFGVPPASMR	1xTMT6plex [N-Term]	1.53868e-05	0	1	4	2	Q9BUN8	0	1547.82	High	High	High	High	High	High	High	High	High	50.3	2.2	24.5	30.3	39.8	38.6	44.1	27.9	44.7	Unique	63.19	High	0	1.64e-05
FALSE	High	AAFVSEQQQK	2xTMT6plex [N-Term; K10]	3.49635e-05	0	1	3	1	P26006	0	1593.9	High	High	High	High	High	High	High	High	High	247.8	2	60.5	138.7	180.5	73.9	178.5	122.5	40.9	Unique	74.9	High	0	3.644e-05
FALSE	High	SDQIGLPDFNAGAMENWGLVTYR	1xTMT6plex [N-Term]	7.1268e-08	0	1	1	5	P15144	0	2783.37	High	High	High	High	High	High	High	High	High	629.1	10.4	198.1	266.6	504.5	361.3	227.8	155.6	92.7	Unique	67.03	High	0	2.532e-06
FALSE	High	EEASGSSVTAEEAK	2xTMT6plex [N-Term; K14]	6.0242e-06	0	1	1	1	P13010	0	1852.95	High	Not Found	High	High	High	High	High	High	High	441.4		83.6	265.5	151.2	181.9	213.5	161.8	184	Unique	51.11	High	0	6.569e-06
FALSE	High	AYSDPSTGEPATYGELQQR	1xTMT6plex [N-Term]	2.15645e-07	0	3	9	2	Q15149-4; Q15149; Q15149-3	0	2299.1	High	High	High	High	High	High	High	High	High	354.4	31.1	217.3	184.4	182.8	231.1	198.7	143.9	172.8	NotUnique	67.33	High	0	2.563e-07
FALSE	High	QEQGAENEELHQLWR	1xTMT6plex [N-Term]	6.24131e-06	0	1	3	1	Q6PGP7	0	2096.04	High	Not Found	High	High	High	High	High	High	High	53.2		16.8	17.9	20.3	28.5	26	23.8	24.1	Unique	46.06	High	0	6.784e-06
FALSE	High	MNQEDFQSRPILELK	2xTMT6plex [N-Term; K15]	9.57395e-05	0	1	3	2	Q92556	0	2306.26	High	Not Found	High	High	High	High	High	High	High	127		85.8	71	122.7	126.3	116.6	77.7	83.7	Unique	26.4	High	0	9.801e-05
FALSE	High	ELPDSVPQECTVR	1xTMT6plex [N-Term]; 1xCarbamidomethyl [C10]	1.68086e-05	0	2	5	2	Q9NZM1; Q9NZM1-3	0	1758.89	High	Not Found	High	High	High	High	High	High	High	81.4		49.3	55.2	54.3	53.7	54.4	39.8	60.1	NotUnique	78.73	High	0	1.796e-05
FALSE	High	CENTDPGYNCLPCPPR	1xTMT6plex [N-Term]; 3xCarbamidomethyl [C1; C10; C13]	0.000122013	0	1	2	1	P07996	0	2178.96	High	Not Found	High	High	High	High	High	High	High	208		3	27.9	112	8.9	103.7	58.3	10.9	Unique	32.95	High	0	0.0001245
FALSE	High	NRQEVAILEASCSEDMGR	1xTMT6plex [N-Term]; 1xCarbamidomethyl [C12]	2.2949e-06	0	1	3	1	Q8TED9	1	2294.11	High	Not Found	High	High	High	High	High	High	High	10		8.8	2	8.1	14.5	9.5	5.4	7.7	Unique	49.85	High	0	2.574e-06
FALSE	High	VDNVEVLDHEEEK	2xTMT6plex [N-Term; K13]	5.97582e-05	0	1	3	1	O00443	0	2013.05	High	Not Found	High	High	High	High	High	High	High	157.3		45.5	55.8	57.7	47.5	73.5	49.8	46.7	Unique	34.82	High	0	6.16e-05
FALSE	High	SDQIGLPDFNAGAMENWGLVTYR	1xTMT6plex [N-Term]; 1xOxidation [M14]	2.91476e-06	0	1	1	1	P15144	0	2799.36	High	High	High	High	High	High	High	High	High	37	1.8	14.8	12.5	26.5	21.5	5.5	5.8	2.8	Unique	62.02	High	0	3.24e-06
FALSE	High	SDQIGLPDFNAGAMENWGLVTYR	2xTMT6plex [N-Term; S1]	2.68392e-05	0	1	1	1	P15144	0	3012.53	High	Not Found	High	Not Found	High	High	High	High	High	10.8		6.1		7.6	8.9	4.7	3.4	2.4	Unique	58.34	High	0	2.83e-05
FALSE	High	FLQEHGSDSFLAEHK	2xTMT6plex [N-Term; K15]	1.25667e-06	0	1	1	4	Q00688	0	2203.15	High	High	High	High	High	High	High	High	High	342.1	7.6	276.7	248.9	247.3	267.4	286.7	197.6	196.6	Unique	41.49	High	0	1.023e-05
FALSE	High	QQQLLNEENLR	1xTMT6plex [N-Term]	1.68086e-05	0	2	7	2	Q9NVI7-2; Q5T9A4	0	1613.88	High	High	High	High	High	High	High	High	High	199	4.4	55.9	79.6	142	128.1	164	98.4	123.3	NotUnique	71.47	High	0	1.789e-05
FALSE	High	EAQTLCDELSVLIGEQYLKDELK	3xTMT6plex [N-Term; K19; K23]; 1xCarbamidomethyl [C6]	6.29827e-05	0	2	8	1	Q9UPN3; Q9UPN3-5	1	3381.84	High	Not Found	High	High	High	High	High	High	High	49.3		32.2	23.5	22.2	30	30.1	18.8	26	NotUnique	40.92	High	0	6.502e-05
FALSE	High	EVPEHITEEELK	2xTMT6plex [N-Term; K12]	2.31532e-06	0	1	2	1	Q7L0Y3	0	1911.05	High	Not Found	High	High	High	High	High	High	High	404.1		239.2	259.2	245.1	215.4	263.8	148.5	203.9	Unique	49.9	High	0	2.581e-06
FALSE	High	SDVLQPGAEVTTDDR	1xTMT6plex [N-Term]	6.46624e-06	0	1	3	1	P53992	0	1831.92	High	High	High	High	High	High	High	High	High	81.9	1.3	37.2	28.4	53.4	51.7	64.3	39.3	35.3	Unique	53.49	High	0	7.063e-06
FALSE	High	GLMLPPPPALEDDMESQLDGSLISR	1xTMT6plex [N-Term]	6.88109e-07	0	1	1	1	Q92692-2	0	2910.48	High	High	High	High	High	High	High	High	High	108.4	17.5	34	54.3	85.2	32.7	94.6	61	12.4	Unique	71.98	High	0	7.909e-07
FALSE	High	QVSSVNEEDFVR	1xTMT6plex [N-Term]	2.19087e-05	0	1	2	1	P40189	0	1637.83	High	Not Found	Not Found	High	High	Not Found	High	High	High	40.5			10.2	31		37.1	12.9	1.6	Unique	78.09	High	0	2.325e-05
FALSE	High	GFSWLSSDPGGLESDTLQWVEEPQR	1xTMT6plex [N-Term]	4.22605e-08	0	1	1	2	Q86T13	0	3049.47	High	High	High	High	High	High	High	High	High	134.8	9.3	14.1	60.4	121.7	33.5	139.8	70	29.5	Unique	78.55	High	0	5.213e-08
FALSE	High	GLSASLPDLDSENWIEVK	2xTMT6plex [N-Term; K18]	1.63912e-06	0	1	6	1	Q6PKG0	0	2431.31	High	Not Found	High	High	High	High	High	High	High	182		122.6	118.5	177.9	176	169.2	119.5	147.1	Unique	48.04	High	0	1.848e-06
FALSE	High	LETLDGGQEDGSEADR	1xTMT6plex [N-Term]	8.65684e-09	0	1	1	1	Q9Y5S1	0	1920.9	High	High	High	High	High	High	High	High	High	113.9	6.2	43.6	47.2	50	54	40.8	26.1	41.8	Unique	97.97	High	0	1.116e-08
FALSE	High	SDPMVQCIIEESGEHIIAGAGELHLEICLK	3xTMT6plex [N-Term; S12; K30]; 2xCarbamidomethyl [C7; C28]	3.49635e-05	0	1	1	1	P13639	0	4036.12	High	Not Found	High	High	High	High	High	High	High	97.6		23.7	26.8	52	59.3	68.1	43.7	42.8	Unique	24.11	High	0	3.664e-05
FALSE	High	ENLASDMYLISQMDSDQYVPITTVANLDHIK	2xTMT6plex [N-Term; K31]	1.44798e-06	0	1	1	1	Q92615	0	3983.02	High	Not Found	High	High	High	High	High	High	High	111.5		44.8	49.7	55.5	58	67.2	46.6	53.7	Unique	59.86	High	0	1.642e-06
FALSE	High	YQVSWSLDHK	2xTMT6plex [N-Term; K10]	7.30785e-05	0	1	1	2	P51571	0	1720.94	High	High	High	High	High	High	High	High	High	267.3	1.5	124.7	357.4	277.1	66.9	224.7	146.9	108.5	Unique	30.55	High	0	7.507e-05
FALSE	High	GQELAFPLSPDWQVDYESYTWR	1xTMT6plex [N-Term]; 1xDeamidated [Q13]	8.40255e-05	0	1	2	2	P26641-2	0	2917.39	High	High	High	High	High	High	High	High	High	122.4	19.6	63.6	50.7	60.9	60.7	61.9	41.9	35.4	Unique	38.01	High	0	8.613e-05
FALSE	High	GQELAFPLSPDWQVDYESYTWR	1xTMT6plex [N-Term]	1.82291e-06	0	1	2	5	P26641-2	0	2916.4	High	High	High	High	High	High	High	High	High	625.5	133.9	276.2	240.3	329.1	304.4	265.7	207.5	197.1	Unique	78.38	High	0	2.415e-05
FALSE	High	EVESPYEVHDYIR	1xTMT6plex [N-Term]	2.80493e-05	0	1	5	1	Q6Y7W6	0	1864.93	High	High	High	High	High	High	High	High	High	86.7	8.4	50.8	59.3	65.4	49.5	80.8	55.1	39.1	Unique	39.35	High	0	2.948e-05
FALSE	High	VTIDAFYMDAYEVSNTEFEK	2xTMT6plex [N-Term; K20]	0.000124136	0	1	7	1	Q8NBK3	0	2830.39	High	Not Found	High	High	High	High	High	High	High	27.6		8.1	17.1	25.9	11.4	20.1	12.1	7.3	Unique	39.73	High	0	0.0001261
FALSE	High	VIPDTLTDMVNQMTEK	2xTMT6plex [N-Term; K16]	6.64024e-06	0	1	1	1	Q16739	0	2293.22	High	Not Found	High	High	High	High	High	High	High	132.7		50.5	71.6	93.6	56.6	136.1	75.9	68.3	Unique	39.43	High	0	7.222e-06
FALSE	High	AGTGVDNVDLEAATR	1xTMT6plex [N-Term]	6.69325e-10	0	1	9	1	O43175	0	1717.89	High	High	High	High	High	High	High	High	High	92.2	3.2	42.3	30.1	29.1	74.2	35.9	17.7	45.4	Unique	127.46	High	0	9.169e-10
FALSE	High	DVSALFPDVVNCMQTDNLELK	2xTMT6plex [N-Term; K21]; 1xCarbamidomethyl [C12]	1.37163e-05	0	1	5	1	Q10567-3	0	2866.47	High	Not Found	High	High	High	High	High	High	High	226.6		111.1	78.4	79.5	106.9	87.2	65.1	66	Unique	64.93	High	0	1.472e-05
FALSE	High	EYFGAFGEIENIELPMDTK	2xTMT6plex [N-Term; K19]	7.06638e-07	0	1	4	1	O14979	0	2661.35	High	High	High	High	High	High	High	High	High	408.9	0.7	22	180.8	64.8	89.8	82.5	68.9	78.6	Unique	57.57	High	0	8.168e-07
FALSE	High	EVTSDSGSIVVSGLTPGVEYVYTIQVLR	1xTMT6plex [N-Term]	6.87611e-09	0	2	15	2	P02751-10; P02751	0	3197.71	High	Not Found	High	High	High	High	High	High	High	52.6		0.9	42.1	37.8	8.7	21.7	18.8	8.7	NotUnique	93.81	High	0	8.887e-09
FALSE	High	LDIEASEAECR	1xTMT6plex [N-Term]; 1xCarbamidomethyl [C10]	1.78811e-05	0	2	8	1	Q9UPN3; Q9UPN3-5	0	1521.74	High	High	High	High	High	High	High	High	High	75.9	1.3	27.6	34.8	35.3	39.9	33.7	25.6	27.7	NotUnique	64.99	High	0	1.898e-05
FALSE	High	SAAPGSLGYQWLSDGSGVFEIAEASGVR	1xTMT6plex [N-Term]	3.86488e-10	0	2	5	4	Q12931; I3L0K7	0	3040.52	High	Not Found	High	High	High	High	High	High	High	132.7		83.2	48.4	65.6	95.2	64.5	43.3	62.6	NotUnique	112.92	High	0	5.396e-10
FALSE	High	APVPIDDNFCGLDINQPLGGSTPVEGLTLYTTSR	1xTMT6plex [N-Term]; 1xCarbamidomethyl [C10]	3.29529e-10	0	1	2	1	O75051	0	3846.94	High	Not Found	High	High	High	Not Found	High	High	Not Found	9.2		2.1	2.2	9.4		6.3	1.9		Unique	97.88	High	0	4.62e-10
FALSE	High	NLIPFDQMTIEDLNEAFPETK	2xTMT6plex [N-Term; K21]	2.17162e-05	0	1	2	1	O75947	0	2923.52	High	Not Found	High	High	High	High	High	High	High										NoQuanValues	47.07	High	0	2.299e-05
FALSE	High	AMENQYSPTPGTDC	1xTMT6plex [N-Term]; 1xCarbamidomethyl [C14]	8.21159e-06	0	1	1	1	Q9NPY3	0	1799.78	High	High	High	High	High	High	High	High	High	100.7	1.4	11.2	37.9	46.4	21.2	58.2	36	7.4	Unique	56.48	High	0	8.919e-06
FALSE	High	NLIPFDQMTIEDLNEAFPETK	2xTMT6plex [N-Term; K21]; 1xOxidation [M8]	9.49112e-05	0	1	2	2	O75947	0	2939.51	High	Not Found	High	High	High	High	High	High	High	109.8		34.3	39.7	75.8	82.3	69.5	48.3	59.3	Unique	46.74	High	0	9.732e-05
FALSE	High	SLQALGEVIEAELR	1xTMT6plex [N-Term]	1.88746e-08	0	1	5	3	K7ER00	0	1757	High	High	High	High	High	High	High	High	High	207.9	10.4	93.6	96.6	129.2	136.3	151.6	90.5	97.1	Unique	99.56	High	0	2.382e-08
FALSE	High	LQTEAQEDDWYDCHR	1xTMT6plex [N-Term]; 1xCarbamidomethyl [C13]	5.36972e-07	0	1	2	1	Q9UHI6	0	2194.97	High	High	High	High	High	High	High	High	High	138	2.7	29.6	47	57.3	50.2	83.9	41.5	36.6	Unique	47.86	High	0	6.222e-07
FALSE	High	YSDESGNMDFDNFISCLVR	1xTMT6plex [N-Term]; 1xCarbamidomethyl [C16]	2.15565e-08	0	1	5	1	A0A0C4DGQ5	0	2498.12	High	High	High	High	High	High	High	High	High	101.7	2.9	67.5	28.2	47.4	89	30.6	20.3	34.3	Unique	74.18	High	0	2.713e-08
FALSE	High	LVSQDNFGLELAAVEAAVR	1xTMT6plex [N-Term]	1.97059e-05	0	1	3	1	O15020	0	2231.22	High	High	High	High	High	High	High	High	High	87.3	6.4	66.1	61.9	67.6	81.8	57.7	38.6	51.4	Unique	74.71	High	0	2.098e-05
FALSE	High	VVDLMAHMASK	3xTMT6plex [N-Term; S10; K11]	0.000144924	0	1	3	3	P04406	0	1889.1	High	High	High	High	High	High	High	High	High	959.4	0.7	247.4	1080.2	1273.8	1034.8	1462.1	1460.4	1410.3	Unique	25.15	High	0	0.0001465
FALSE	High	GATLAFLNDEVWNLSNVQQGK	2xTMT6plex [N-Term; K21]	1.90496e-07	0	1	5	1	O95825	0	2762.49	High	Not Found	High	High	High	High	High	High	High	92.9		70.9	71.4	96.9	93.5	80.3	60.2	79.2	Unique	65.22	High	0	2.269e-07
FALSE	High	VVDLMAHMASK	2xTMT6plex [N-Term; K11]	1.33573e-05	0	1	3	5	P04406	0	1659.93	High	High	High	High	High	High	High	High	High	1104	6.3	499.7	1760.7	1087.2	898.8	1379.8	1359.5	1456.9	Unique	47.83	High	0	1.427e-05
FALSE	High	EIVDPLYGIAEVEIPNIQK	2xTMT6plex [N-Term; K19]	3.80129e-07	0	1	7	4	Q68EM7	0	2598.48	High	Not Found	High	High	High	High	High	High	High	403.8		264.9	262.2	288.1	301.2	356.9	276.9	217.7	Unique	57.36	High	0	4.437e-07
FALSE	High	TTEIIHSTLNPTWDQTIIFDEVEIYGEPQTVLQNPPK	2xTMT6plex [N-Term; K37]	6.63784e-05	0	2	6	2	Q9NZM1; Q9NZM1-3	0	4725.47	High	Not Found	High	High	High	High	High	High	High	23.3		84.3	74.3	19.3	25.1	27.5	13.6	18.5	NotUnique	58.55	High	0	6.825e-05
FALSE	High	LPIPESQVITINPELPVEEAAEDYAK	2xTMT6plex [N-Term; K26]	1.07078e-05	0	1	4	1	O95336	0	3323.8	High	Not Found	High	High	High	High	High	High	High	68.1		46.8	31	27.1	66.2	27	21.5	27.7	Unique	56.72	High	0	1.149e-05
FALSE	High	LLPPAQDGFEVLGAAELEAVR	1xTMT6plex [N-Term]	0.000118893	0	1	1	1	Q8WZA9	0	2424.33	High	Not Found	High	High	High	High	High	High	High	21.9		6.3	6	9.8	11.4	5.8	6.7	8.9	Unique	28.83	High	0	0.000121
FALSE	High	LDSVESVLPYEYTAFDFCQASEGK	2xTMT6plex [N-Term; K24]; 1xCarbamidomethyl [C18]	1.77398e-08	0	1	1	3	Q99805	0	3213.57	High	High	High	High	High	High	High	High	High	361	0.7	42.7	104.5	147.5	45.9	159.1	89.6	48.8	Unique	81.87	High	0	9.874e-06
FALSE	High	SGNENGEFYLR	1xTMT6plex [N-Term]; 1xDeamidated [N5]	5.28547e-05	0	1	6	2	Q12805	0	1515.73	High	High	Not Found	High	High	High	High	High	High	751.3	1.3		110.6	437.5	31.5	371.9	144.2	27.2	Unique	74.95	High	0	6.362e-05
FALSE	High	SGNENGEFYLR	1xTMT6plex [N-Term]	5.87201e-05	0	1	6	1	Q12805	0	1514.74	High	High	Not Found	High	High	High	High	High	High	297.3	1.3		39.2	174.7	12.1	167.3	55.7	9.7	Unique	74.97	High	0	6.072e-05
FALSE	High	DGETVESGEVTIK	2xTMT6plex [N-Term; K13]	1.13966e-07	0	1	1	2	P51687	0	1821.98	High	Not Found	High	High	High	High	High	High	High	118.5		51.9	44.3	84.8	83.9	50.3	32.5	57.7	Unique	85.51	High	0	1.371e-07
FALSE	High	AAELLQDEYSGR	1xTMT6plex [N-Term]	2.17162e-05	0	1	5	1	Q9BUK6	0	1580.81	High	Not Found	High	High	High	High	High	High	High	22.9		10.9	10.5	10.5	15.3	11.9	2.2	3	Unique	62.31	High	0	2.296e-05
FALSE	High	ASATGMIIMDGVEVPEENVLPGASSLGGPFGCLNNAR	1xTMT6plex [N-Term]; 1xCarbamidomethyl [C32]	4.78569e-07	0	1	2	1	Q92947	0	3959.95	High	Not Found	High	High	High	High	High	High	High	40.4		18.2	22.1	36.3	32.9	26.7	15.8	22.9	Unique	73.16	High	0	5.562e-07
FALSE	High	VLTCTDLEQGPNFFLDFENAQPTESEK	2xTMT6plex [N-Term; K27]; 1xCarbamidomethyl [C4]	0.000124136	0	1	11	1	Q9NUQ9	0	3587.76	High	High	High	High	High	High	High	High	High	67.9	1.5	21.4	20.6	9.3	27.1	11.1	10.8	17.1	Unique	55.68	High	0	0.0001268
FALSE	High	DVYIVQDLMETDLYK	2xTMT6plex [N-Term; K15]	7.24429e-05	0	2	10	2	P28482; P27361	0	2303.22	High	Not Found	High	High	High	High	High	High	High	210.1		138.4	74.4	79.3	161.8	78.6	51.5	68.6	NotUnique	52.56	High	0.0001318	0.0004855
FALSE	High	NQDECIVALHDCNGDVNK	2xTMT6plex [N-Term; K18]; 1xDeamidated [N13]; 2xCarbamidomethyl [C5; C12]	6.81433e-05	0	1	3	1	Q5T6F2	0	2560.22	High	Not Found	Not Found	High	High	High	High	High	High	10.6			1.9	7.7	7.5	11.6	6.5	1.9	Unique	41.75	High	0	7.022e-05
FALSE	High	EFNGQHFILEEAITGDFALVK	2xTMT6plex [N-Term; K21]; 1xDeamidated [Q/N]	9.29604e-08	0	1	2	2	P55809	0	2837.51	High	High	High	High	High	High	High	High	High	96.8	1.4	56.5	53.7	92.2	81.5	88.1	54.2	87	Unique	63.42	High	0	1.593e-07
FALSE	High	SEPIPESNDGPVK	2xTMT6plex [N-Term; K13]	5.51432e-07	0	1	1	5	P30101	0	1826.99	High	High	High	High	High	High	High	High	High	2049.2	13	783.4	998	1540.4	961.9	1613.7	945.5	681.7	Unique	82.51	High	0	6.374e-07
FALSE	High	TNEAQAIETAR	1xTMT6plex [N-Term]; 1xDeamidated [N2]	9.91238e-05	0	1	3	1	P61088	0	1433.74	High	Not Found	High	High	High	High	High	High	High	14.1		8	5.9	7.5	14.5	5.7	3.1	6	Unique	48.18	High	0	0.0001017
FALSE	High	STQPQQNNEELPTYEEAK	2xTMT6plex [N-Term; K18]	0.000132994	0	1	2	1	Q8IY63	0	2564.29	High	Not Found	High	High	High	High	High	High	High	19.3		6.6	11	16.4	16.7	14.8	9.5	13.5	Unique	45.46	High	0	0.0001354
FALSE	High	DSPPEVAGAR	1xTMT6plex [N-Term]	7.05685e-05	0	1	1	1	Q5T160	0	1227.65	High	Not Found	High	High	High	High	High	High	High	79.8		24.9	30.9	39.1	49.1	29.9	17.6	39.3	Unique	49.31	High	0	7.276e-05
FALSE	High	GLAEVQQDGEAEEGATSDGEK	2xTMT6plex [N-Term; K21]; 1xDeamidated [Q]	1.40907e-08	0	1	3	3	Q02952	0	2579.24	High	Not Found	High	High	High	High	High	High	High	103.8		147.3	32.5	43	88.1	58.7	40.8	54.7	Unique	89.04	High	0	1.79e-08
FALSE	High	GLAEVQQDGEAEEGATSDGEK	2xTMT6plex [N-Term; K21]	2.2334e-08	0	1	3	3	Q02952	0	2578.25	High	Not Found	High	High	High	High	High	High	High	53.9		72.9	18.2	25.5	49.8	28	21.1	35.4	Unique	79.94	High	0	4.477e-06
FALSE	High	DEPGEQVELK	2xTMT6plex [N-Term; K10]	0.000147431	0	1	4	1	Q9Y4L1	0	1601.88	High	Not Found	High	High	High	High	High	High	High	39.7		4.9	5.8	2.9	7.7	11.6	3	3.2	Unique	46.97	High	2.047e-05	0.0001501
FALSE	High	KFQQQILAQQK	3xTMT6plex [N-Term; K1; K11]	2.80493e-05	0	1	2	1	Q9H2K8	1	2047.26	High	Not Found	High	High	High	High	High	High	High	185.4		130	94	177	198.1	203.8	140.3	147.1	Unique	37.59	High	0	2.941e-05
FALSE	High	ELQIHDEEVLR	1xTMT6plex [N-Term]	6.69617e-05	0	1	5	1	Q9BZ67	0	1609.87	High	High	High	High	High	High	High	High	High	148.8	8	65	74.1	106	86.7	112.3	62.4	55.5	Unique	46.31	High	0	6.914e-05
FALSE	High	RGGPGGGMDVEQQEEEDNDEEAAAGSR	1xTMT6plex [N-Term]	4.91094e-09	0	1	1	1	Q96GS4	1	3019.31	High	Not Found	Not Found	Not Found	Not Found	Not Found	Not Found	Not Found	High	3.2								1.3	Unique	104.27	High	0	6.433e-09
FALSE	High	GITGVEDKESWHGKPLPK	4xTMT6plex [N-Term; K8; K14; K18]	5.87201e-05	0	1	4	1	P29401-2	1	2894.69	High	Not Found	High	High	High	High	High	High	High	39		321.2	178.2	51.3	73.2	119.1	76.1	46.1	Unique	13.82	High	0	6.052e-05
FALSE	High	ETGGAEGTGDAVLGEK	2xTMT6plex [N-Term; K16]	3.59912e-11	0	1	3	1	Q92667	0	1949.02	High	Not Found	High	High	High	High	High	High	High	65.6		21.1	26.6	39.8	48.4	45.1	25.9	41.1	Unique	129	High	0	5.324e-11
FALSE	High	QQAGAQGPGSADLEDGEMGK	2xTMT6plex [N-Term; K20]	2.41428e-05	0	1	2	1	Q9C0C2	0	2404.18	High	Not Found	High	High	High	High	High	High	High	21.5		7.4	3.7	7.8	12.9	12.4	6	11.2	Unique	46.34	High	0	2.55e-05
FALSE	High	ETVEEQASTTER	1xTMT6plex [N-Term]	7.99646e-06	0	1	4	2	Q13620	0	1608.79	High	Not Found	High	High	High	High	High	High	High	57.8		30.9	28.3	31.5	57	24.6	14.7	19.6	Unique	59.36	High	0	8.702e-06
FALSE	High	MEDSVGCLETAEEVKR	2xTMT6plex [N-Term; K15]; 1xCarbamidomethyl [C7]	2.69097e-07	0	1	1	1	P35579	1	2311.17	High	Not Found	High	High	High	High	High	High	High	76.3		60.9	43.8	42.8	60.9	45.3	32.5	48.3	Unique	61.59	High	0	3.177e-07
FALSE	High	GDEEEEGEEK	2xTMT6plex [N-Term; K10]	5.76997e-05	0	1	3	1	P27824-2	0	1608.76	High	Not Found	High	Not Found	Not Found	Not Found	High	Not Found	Not Found	6.9		2.1				1.6			Unique	53.53	High	0	5.969e-05
FALSE	High	HVLTLTDQVTR	1xTMT6plex [N-Term]	0.000116857	0	1	5	1	P05106	0	1511.87	High	High	High	High	High	High	High	High	High	78.1	2.9	28	31.9	39.7	31.4	30.4	18.2	11.2	Unique	60.61	High	0	0.0001186
FALSE	High	VDQALHTQTDADPAEEYAR	1xTMT6plex [N-Term]	6.93455e-05	0	1	6	1	P52888	0	2359.14	High	High	High	High	High	High	High	High	High	71.9	2.4	65.5	23.2	33.6	97.6	33.2	32.6	40.6	Unique	49.38	High	0	7.125e-05
FALSE	High	SSSEGGDAGNDTR	1xTMT6plex [N-Term]	3.9899e-05	0	1	2	1	A0A024R216	0	1481.67	High	Not Found	High	High	High	High	High	High	High	38.5		19.6	18	11.6	22.5	9.9	8.8	12.3	Unique	95.23	High	0	4.141e-05
FALSE	High	HVAVTNMNEHSSR	1xTMT6plex [N-Term]	3.3753e-05	0	2	5	1	Q12840; P33176	0	1710.85	High	Not Found	High	High	High	High	High	High	High	51.5		29.4	28.5	17.6	44.3	39.9	22.5	25.8	NotUnique	45.81	High	0	3.525e-05
FALSE	High	ECCHGDLLECADDRADLAK	2xTMT6plex [N-Term; K19]; 3xCarbamidomethyl [C2; C3; C10]	6.46624e-06	0	1	1	1	cRAP087	1	2706.27	High	Not Found	High	High	High	High	High	High	High	91.1		207.2	36.2	172.2	197.4	53.5	99.5	48.5	Unique	41.8	High	0	7.055e-06
FALSE	High	ELQREPLTPEEVQSVR	1xTMT6plex [N-Term]	2.3988e-06	0	1	5	1	Q6FI81	1	2139.16	High	High	High	High	High	High	High	High	High	51.1	2.6	37.4	27.2	33.8	63.7	34.7	17.4	29.5	Unique	50.35	High	0	2.68e-06
FALSE	High	KAQGSTSSTR	2xTMT6plex [N-Term; K1]	0.000116857	0	1	3	1	P78324	1	1480.85	High	Not Found	High	High	High	High	High	High	High	107.1		16.5	55.7	83	21.8	120	68.5	7.1	Unique	36.68	High	0	0.0001195
FALSE	High	DGFQDVLAPGEGSAGR	1xTMT6plex [N-Term]	0.000116857	0	1	3	1	Q8IY17-4	0	1804.9	High	High	High	High	High	High	High	High	High	76.8	6.2	30.3	28.6	39.3	29.6	37.5	19.4	33.1	Unique	24.67	High	0	0.0001188
FALSE	High	YHYVGTFPDGQK	2xTMT6plex [N-Term; K12]	1.53868e-05	0	1	2	2	O95302	0	1869.99	High	High	High	High	High	High	High	High	High	532.9	9.8	113.3	172.3	332.6	130.2	272.3	149.2	67.5	Unique	41.28	High	0	1.638e-05
FALSE	High	LFIMLENSQMR	1xTMT6plex [N-Term]	2.07782e-05	0	1	1	1	P26022	0	1610.86	High	Not Found	Not Found	High	High	High	High	High	High	221.7			35.8	76.4	20.2	89.8	39.4	10.7	Unique	71.61	High	0	2.196e-05
FALSE	High	AETEQGEQQR	1xTMT6plex [N-Term]	5.23929e-05	0	3	9	3	Q15149-4; Q15149; Q15149-3	0	1404.69	High	High	High	High	High	High	High	High	High	280.6	6.8	94.7	85.6	78.9	114	89.9	64.6	89.9	NotUnique	67.06	High	0	5.441e-05
FALSE	High	SESEATSER	1xTMT6plex [N-Term]	6.93455e-05	0	1	5	2	Q15390	0	1224.59	High	Not Found	High	High	High	High	High	High	High	50.7		20.7	24.2	38.4	29.5	38.4	21.8	33.1	Unique	61.37	High	0	7.128e-05
FALSE	High	QQSADQDAESAYTEPYK	2xTMT6plex [N-Term; K17]	3.47908e-07	0	1	3	1	Q6ZNL6	0	2389.16	High	Not Found	High	High	High	High	High	High	High	133.3		114	56.6	88	149.1	93.4	72.3	89.6	Unique	52.48	High	0	4.09e-07
FALSE	High	SEPIPESNDGPVK	2xTMT6plex [N-Term; K13]; 1xDeamidated [N8]	4.49808e-06	0	1	1	3	P30101	0	1827.97	High	High	High	High	High	High	High	High	High	552.3	5.2	223.3	283.8	432	274.5	406	259.5	192.5	Unique	52.79	High	0	4.968e-06
FALSE	High	TNEAQAIETAR	1xTMT6plex [N-Term]	4.51264e-05	0	1	3	1	P61088	0	1432.76	High	High	High	High	High	High	High	High	High	312.8	3	68.3	71	100.6	196	120.8	70.6	81.5	Unique	75.92	High	0	4.699e-05
FALSE	High	IMIMTDQDQDGSHIK	2xTMT6plex [N-Term; K15]	2.7803e-05	0	2	7	1	Q02880; P11388-4	0	2190.13	High	Not Found	High	High	High	High	High	High	High	117.5		88.2	61.3	74.6	118.1	105.5	51.9	52.8	NotUnique	46.19	High	0	2.921e-05
FALSE	High	FHEICSNLVK	2xTMT6plex [N-Term; K10]; 1xCarbamidomethyl [C5]	3.78469e-05	0	1	4	3	H3BN98	0	1704.95	High	Not Found	High	High	High	High	High	High	High	392.7		288.2	191.4	295.9	336.2	271.3	213.1	319.6	Unique	40.45	High	0	3.943e-05
FALSE	High	MAVQFELEDLNLRPDPEPLLTEMIHEAAYR	1xTMT6plex [N-Term]	9.29604e-08	0	1	2	1	Q10713	0	3769.91	High	Not Found	High	High	High	High	High	High	High	54.9		27.5	31.6	51.4	38.6	44.4	31.9	36.5	Unique	68.8	High	0	1.127e-07
FALSE	High	FPPEASGYLHIGHAK	2xTMT6plex [N-Term; K15]	1.1698e-05	0	1	2	1	P07814	0	2082.15	High	High	High	High	High	High	High	High	High	87.3	4.3	113.4	75.7	65.2	63.7	61.2	44.8	60.2	Unique	58.02	High	0	1.26e-05
FALSE	High	ERPQVELTFEETER	1xTMT6plex [N-Term]	5.76997e-05	0	1	1	2	Q9NQ50	0	1992.02	High	High	High	High	High	High	High	High	High	100.6	21.9	43.7	47	54	71	52.3	42.4	54	Unique	39.05	High	0	5.966e-05
FALSE	High	LPDTALPTLQNGAAVTDLAWDPFDPHR	1xTMT6plex [N-Term]; 1xDeamidated [Q/N]	4.38004e-07	0	1	4	2	P57737-3	0	3161.61	High	Not Found	High	High	High	High	High	High	High	15.7		9.6	6.4	12.1	14.7	6.8	7.8	3.1	Unique	73.59	High	0	5.092e-07
FALSE	High	FTDDTFDPELAATIGVDFK	2xTMT6plex [N-Term; K19]	0.000105329	0	1	4	2	Q9NP72	0	2560.32	High	Not Found	High	High	High	High	High	High	High	203.3		78.8	101.4	150.4	116.4	172.6	116.1	113.4	Unique	41.51	High	0	0.0001071
FALSE	High	GVPQIEVTFDIDANGILNVTATDK	2xTMT6plex [N-Term; K24]	3.32714e-08	0	1	5	4	A0A0G2JIW1	0	2988.63	High	High	High	High	High	High	High	High	High	42.3	9.1	172.5	34.7	20.2	207.7	30.5	25.1	142.2	Unique	81.1	High	0	4.158e-08
FALSE	High	VFQVVESTRPGKK	3xTMT6plex [N-Term; K12; K13]	5.10314e-05	0	1	3	1	Q9Y251	1	2162.33	High	Not Found	High	High	High	High	High	High	High	76.9		14.8	70	229.7	78.2	128.5	59.8	22.9	Unique	14.73	High	0	5.269e-05
FALSE	High	GVPQIEVTFDIDANGILNVTATDK	2xTMT6plex [N-Term; K24]; 1xDeamidated [N/Q]	2.07903e-10	0	1	5	3	A0A0G2JIW1	0	2989.61	High	Not Found	High	High	High	High	High	High	High	5.3		98.6	16.1	3.9	96.4	5.2	9.7	57.9	Unique	108.99	High	0	2.953e-10
FALSE	High	ACIENGASCIDISGEPQFLELMQLK	2xTMT6plex [N-Term; K25]; 2xCarbamidomethyl [C2; C9]	3.12826e-07	0	1	1	1	Q8NBX0	0	3281.66	High	Not Found	High	High	High	High	High	High	High	38.7		18.1	15.7	21.4	24.6	15.8	5.8	12.8	Unique	73.13	High	0	3.672e-07
FALSE	High	FPNGVQLSPAEDFVLVAETTMAR	1xTMT6plex [N-Term]; 1xDeamidated [N3]	2.94068e-06	0	1	3	1	Q9HDC9	0	2722.4	High	High	High	High	High	High	High	High	High	187.2	10.8	72.4	114.6	135.3	89.6	145.7	92.8	60.4	Unique	62.53	High	0	3.26e-06
FALSE	High	VGEPVALSEEER	1xTMT6plex [N-Term]	9.46529e-07	0	1	6	1	Q13435	0	1543.82	High	Not Found	High	High	High	High	High	High	High	69.6		15.9	41.1	31.4	45.6	39.6	26.8	24.7	Unique	98.1	High	0	1.079e-06
FALSE	High	GKGSLGPWGTGK	3xTMT6plex [N-Term; K2; K12]	1.62248e-05	0	1	1	1	A1X283	1	1832.1	High	Not Found	High	High	High	High	High	High	High	21.1		71.1	58	113.6	106.3	122.3	82.8	56.2	Unique	49.89	High	0	1.726e-05
FALSE	High	THPSAAVPVCPR	1xTMT6plex [N-Term]; 1xCarbamidomethyl [C10]	1.59405e-05	0	1	2	1	Q3KQU3	0	1520.82	Not Found	Not Found	Not Found	Not Found	High	High	High	High	Not Found					3.4	1.2	2.4	1.5		Unique	49.45	High	0	1.706e-05
FALSE	High	EQLEEEEEAKHNLEK	3xTMT6plex [N-Term; K10; K15]	7.1908e-06	0	1	1	4	P35579	1	2542.36	High	Not Found	High	High	High	High	High	High	High	210.8		221.2	187.8	224	269	232.2	161.7	191	Unique	42.22	High	0	9.798e-05
FALSE	High	AQESQIDFLNSVIVDLQR	1xTMT6plex [N-Term]	1.83613e-05	0	1	5	1	P30622-2	0	2304.24	High	Not Found	High	High	High	High	High	High	High	21.4		14.4	8	12.1	19.7	10	9.6	13	Unique	33.55	High	0	1.942e-05
FALSE	High	LCYGLNMDFVDPAQITMK	2xTMT6plex [N-Term; K18]; 1xCarbamidomethyl [C2]	1.6537e-06	0	1	1	1	P23921	0	2574.32	High	Not Found	High	High	High	High	High	High	High	80.4		50.6	26.5	41.7	58.1	56.8	37.6	35.3	Unique	45.25	High	0	1.869e-06
FALSE	High	TLSSSTQASIEIDSLYEGIDFYTSITR	2xTMT6plex [N-Term; T/S]; 1xDeamidated [Q7]	3.51043e-06	0	1	6	5	A8K7Q2	0	3456.77	Not Found	Not Found	Not Found	Not Found	High	High	Not Found	High	High										NoQuanValues	41.97	High	0	3.87e-06
FALSE	High	GVPQIEVTFDIDANGILNVSAVDK	2xTMT6plex [N-Term; K24]	1.28931e-05	0	1	6	6	A8K7Q2	0	2972.63	High	Not Found	High	High	High	High	High	High	High	37.9		39.2	18	20.8	40.4	25.7	16.4	22.5	Unique	66.47	High	0	1.384e-05
FALSE	High	GVPQIEVTFDIDANGILNVSAVDK	2xTMT6plex [N-Term; K24]; 1xDeamidated [Q/N]	6.87611e-09	0	1	6	13	A8K7Q2	0	2973.62	High	High	High	High	High	High	High	High	High	88.4	2.4	84.4	52.7	56.4	100.8	72	42.4	61.3	Unique	82.62	High	0	8.914e-09
FALSE	High	TLSSLYSEMQK	2xTMT6plex [N-Term; K11]	4.02516e-05	0	1	2	1	Q86WC4	0	1744.96	High	Not Found	High	High	High	High	High	High	High	29.3		4	8.2	27.3	8	25.6	12.3	5.8	Unique	55.93	High	0	4.177e-05
FALSE	High	GESENAGTNQETR	1xTMT6plex [N-Term]	2.66724e-07	0	1	1	1	Q08170	0	1621.76	High	Not Found	High	High	High	High	High	High	High	22.7		5	11.1	6.8	12.6	6.4	3.2	10.2	Unique	94.36	High	0	3.138e-07
FALSE	High	ELPDQITQDCR	1xTMT6plex [N-Term]; 1xCarbamidomethyl [C10]	7.83646e-05	0	1	2	1	Q9NY15	0	1603.79	High	Not Found	Not Found	High	High	High	High	High	High	74.1			41.4	56.7	5.6	35.3	22	1.7	Unique	85.88	High	0	8.039e-05
FALSE	High	INSYGYGDHYIHIK	3xTMT6plex [N-Term; S3; K14]	0.000109991	0	1	3	1	Q96EY1	0	2367.31	High	Not Found	High	High	High	High	High	High	High	135		16.7	32.7	89.7	79.6	90.1	72.9	88.1	Unique	13.07	High	0	0.0001119
FALSE	High	INSYGYGDHYIHIK	2xTMT6plex [N-Term; K14]	0.000127389	0	1	3	1	Q96EY1	0	2138.14	High	High	High	High	High	High	High	High	High	117.3	1.2	47.9	60.6	70.6	38.4	73.4	31.8	43.6	Unique	34.35	High	0	0.0001294
FALSE	High	QFQADFTSLSDQEPLHVAQALQK	2xTMT6plex [N-Term; K23]	9.88693e-09	0	1	2	3	P05121	0	3059.62	High	Not Found	High	High	High	High	High	High	High	489.7		39.1	158	683.1	74.6	519.6	269.7	31.4	Unique	85.02	High	0	1.274e-08
FALSE	High	QFQADFTSLSDQEPLHVAQALQK	3xTMT6plex [N-Term; K23; S/T]	2.76394e-06	0	1	2	4	P05121	0	3288.78	High	High	High	High	High	High	High	High	High	666.3	1	54.9	130	1109.6	137.3	818.5	447.9	44.2	Unique	29.99	High	0	2.176e-05
FALSE	High	EQPAVVGLDSEEMER	1xTMT6plex [N-Term]	1.06203e-06	0	1	3	1	Q9NPI6	0	1917.94	High	Not Found	High	High	High	High	High	High	High	14.5		6.6	6.4	6.5	8.9	7.1	2.2	5.8	Unique	61.64	High	0	1.213e-06
FALSE	High	VLQFNEVGANAVTPMTPENFTSCGFMQQIQK	2xTMT6plex [N-Term; K31]; 1xCarbamidomethyl [C23]	3.58995e-05	0	1	4	1	P05120	0	3944.97	High	Not Found	High	High	High	High	High	High	Not Found	42.5		22.5	21.7	15.1	29	1.1	2.1		Unique	51.62	High	0	3.758e-05
FALSE	High	ITAELSWPSILSSPR	1xTMT6plex [N-Term]	0.000134143	0	1	1	1	Q92545	0	1886.06	High	Not Found	High	High	High	High	High	High	High	51.6		9.4	19	38.4	10	47.7	17.3	7.6	Unique	31.09	High	0	0.0001358
FALSE	High	LREAEETQSTLQAECDQYR	1xTMT6plex [N-Term]; 1xCarbamidomethyl [C15]	6.63675e-09	0	2	7	1	Q9P2E9; Q9P2E9-2	1	2556.22	High	High	High	High	High	High	High	High	High	20.1	3.2	38.9	32.2	90.3	52.3	77.8	45.6	38.4	NotUnique	94.73	High	0	8.6e-09
FALSE	High	TLSSSTQASIEIDSLYEGIDFYTSITR	1xTMT6plex [N-Term]	1.85431e-08	0	1	6	6	A8K7Q2	0	3226.62	High	High	High	High	High	High	High	High	High	52.3	1.3	18.3	30.4	38.7	36.5	34.5	29.6	25.7	Unique	54.28	High	0	2.34e-08
FALSE	High	KYVATLGVEVHPLVFHTNR	2xTMT6plex [N-Term; K1]	2.5074e-06	0	1	5	1	J3KQE5	1	2638.52	High	Not Found	High	High	High	High	High	High	High	112.8		60.6	80.5	78.7	94.6	70.3	62.7	67.3	Unique	44.33	High	0	2.801e-06
FALSE	High	WVPFDGDDIQLEFVR	1xTMT6plex [N-Term]	3.76811e-06	0	1	4	4	P39656	0	2065.06	High	High	High	High	High	High	High	High	High	469.2	34.9	168.1	249.1	310.2	175.2	369.4	203.3	167.8	Unique	55.99	High	0	1.101e-05
FALSE	High	QEGSEEGMYVLR	1xTMT6plex [N-Term]	4.78566e-06	0	1	1	1	P23458	0	1626.8	High	High	High	High	High	High	High	High	High	77.7	2.3	23.5	24.7	25.7	16.5	40.2	22.7	20.3	Unique	89.14	High	0	5.255e-06
FALSE	High	GQDHCGIESEVVAGIPR	1xTMT6plex [N-Term]; 1xCarbamidomethyl [C5]	1.6828e-07	0	1	2	4	P07858	0	2053.03	High	High	High	High	High	High	High	High	High	422.2	116.9	249.7	279.3	347.1	194.1	212.6	152.5	78.6	Unique	97.76	High	0	2.005e-07
FALSE	High	DLDFANDASSMLASAVEK	2xTMT6plex [N-Term; K18]	2.76394e-06	0	1	1	2	Q14573	0	2342.19	High	Not Found	High	High	High	High	High	High	High	290.4		143.5	146.9	180.8	184.7	181.2	110.9	179.2	Unique	45.32	High	0	3.075e-06
FALSE	High	DPEEIEKEEQAAAEK	3xTMT6plex [N-Term; K7; K15]	1.12e-06	0	1	3	2	A0A0C4DG17	1	2403.29	High	Not Found	High	High	High	High	High	High	High	759.9		191.7	260.9	176.2	204.4	272.5	211.1	215.1	Unique	32.38	High	0.0007913	0.006532
FALSE	High	GLQEEPVEGFR	1xTMT6plex [N-Term]	8.47607e-05	0	1	1	2	P49427	0	1489.78	High	High	High	High	High	High	High	High	High	58.8	11.2	37.9	29.6	24.8	61.5	39.2	22.7	29.3	Unique	57.49	High	0	8.672e-05
FALSE	High	DLEGAGDAAAWQAEHVR	1xTMT6plex [N-Term]	2.19551e-06	0	1	2	1	Q9BVL4	0	2025	High	Not Found	High	High	High	High	High	High	High	21.9		9.3	8.6	10.4	10	7.7	7	7.1	Unique	57.63	High	0	2.467e-06
FALSE	High	MDLNSEQAEQLER	1xTMT6plex [N-Term]	3.01985e-06	0	1	2	1	Q52LJ0-2	0	1791.87	High	Not Found	High	High	High	High	High	High	High	31.5		12.1	26	27	27.8	31.3	24.7	24.7	Unique	89.51	High	0	3.356e-06
FALSE	High	APSPLYSVEFSEEPFGVIVR	1xTMT6plex [N-Term]	4.04444e-07	0	1	2	2	P10253	0	2452.3	High	High	High	High	High	High	High	High	High	65.8	1.1	40.3	68.6	66.4	69.6	72.7	64.8	68.5	Unique	79.08	High	0	4.732e-07
FALSE	High	NGQYAEASALYGR	1xTMT6plex [N-Term]; 1xDeamidated [N1]	8.36146e-07	0	1	1	1	Q15785	0	1629.81	High	High	High	High	High	High	High	High	High	41.4	1	22.4	26.5	34	42.5	34.1	23	21.2	Unique	73.7	High	0	9.636e-07
FALSE	High	NGQYAEASALYGR	1xTMT6plex [N-Term]	1.38381e-05	0	1	1	1	Q15785	0	1628.82	High	Not Found	High	High	High	High	High	High	High	7.2		1.7	1.6	8.2	8.2	6.4	3.3	2.3	Unique	58.81	High	0	1.477e-05
FALSE	High	IVECQGLPIVNGQCDPYATVTLAGPFR	1xTMT6plex [N-Term]; 1xDeamidated [Q/N]; 2xCarbamidomethyl [C4; C14]	2.04534e-06	0	1	2	2	Q14644	0	3205.62	High	Not Found	High	High	High	High	High	High	High	38.1		25.5	23	25.4	18.2	25	14.9	14	Unique	84.15	High	0	1.894e-05
FALSE	High	ASALLYAGESMFTR	1xTMT6plex [N-Term]	1.42101e-05	0	1	4	1	Q9Y2E5	0	1745.91	High	High	High	High	High	High	High	High	High	38.8	3.3	12.4	23.1	35.5	24.6	25.1	17.9	10	Unique	43.74	High	0	1.518e-05
FALSE	High	STLTDSLVCK	2xTMT6plex [N-Term; K10]; 1xCarbamidomethyl [C9]	2.52319e-05	0	1	1	2	P13639	0	1581.89	High	Not Found	High	High	High	High	High	High	High	654.7		279	291.8	493.8	474.5	810.8	415.4	296.6	Unique	67.09	High	2.047e-05	0.0001927
FALSE	High	DFLDGVYAFEYYPSTPGR	1xTMT6plex [N-Term]	2.88857e-07	0	1	10	1	O75369-8	0	2326.12	High	Not Found	High	High	High	High	High	High	High	86.2		37.9	21.1	23.2	39.3	14.2	14.1	22.4	Unique	73.82	High	0	3.393e-07
FALSE	High	LTSSAEDEVETTYSR	1xTMT6plex [N-Term]	0.000141241	0	1	2	1	P42694	0	1916.93	High	Not Found	High	Not Found	High	High	High	High	High	3.6		1.5		1.6	2	3	2.3	1.5	Unique	33.66	High	0	0.0001434
FALSE	High	ICEDSAEILDSDVLDRPLNIMIPK	2xTMT6plex [N-Term; K24]; 1xCarbamidomethyl [C2]	6.4578e-11	0	1	3	2	Q92973	0	3214.71	High	Not Found	High	High	High	High	High	High	High	340.1		135.2	111.6	108.1	195.7	113.5	75.7	126	Unique	77.39	High	0	9.394e-11
FALSE	High	GTVQALHATGAR	2xTMT6plex [N-Term; T9]	3.43529e-05	0	1	3	1	Q7Z4W1	0	1639.96	High	Not Found	High	High	High	High	High	High	High	104		50.1	51.2	104.9	102	106.8	83.3	97.3	Unique	31.27	High	0	3.606e-05
FALSE	High	ELNMIIMLPDETTDLR	1xTMT6plex [N-Term]	5.42644e-05	0	1	3	1	A0A087X1N8	0	2133.11	High	High	High	High	High	High	High	High	High	87.9	4.7	90	42.6	41.2	113.6	23.5	28.7	43.9	Unique	46.69	High	0	5.627e-05
FALSE	High	ALDVSASDDEIAR	1xTMT6plex [N-Term]	7.06638e-07	0	1	5	1	C9JIF9	0	1590.82	High	High	High	High	High	High	High	High	High	36.3	2.2	39.2	24	18.5	59.1	18.7	12.2	21	Unique	109.32	High	0	8.165e-07
FALSE	High	TASAKPDVALLDTQDVENMSDDDGWQFVNLGDQQSFGIK	3xTMT6plex [N-Term; K5; K39]	5.61287e-07	0	1	1	1	O60518	0	4942.47	High	Not Found	High	High	High	High	High	High	High	7.7		2	3.5	8.3	7.1	7.9	2.9	2.7	Unique	54.95	High	0	6.482e-07
FALSE	High	AFTQTDVATFSELTGDVNPLHLNEDFAK	2xTMT6plex [N-Term; K28]	4.78569e-07	0	1	2	1	P86397	0	3538.81	High	Not Found	High	High	High	High	High	High	High	6.3		2.8	2.5	2.4	3.1	6.8	2.5	3.3	Unique	63.64	High	0	5.577e-07
FALSE	High	SSGSVASLPQSDR	1xTMT6plex [N-Term]	7.85618e-06	0	2	10	1	O75122; O75122-3	0	1519.79	High	Not Found	High	High	High	High	High	High	High	30.4		1.6	10.9	17.9	10.3	28.6	12.5	5.8	NotUnique	66.19	High	0	8.496e-06
FALSE	High	SLQEEPVEGFR	1xTMT6plex [N-Term]	0.000135301	0	1	1	2	Q712K3	0	1519.8	High	High	High	High	High	High	High	High	High	78.6	2.5	56.9	38.6	38.6	89.9	46	26.3	41.3	Unique	72.9	High	0	0.000138
FALSE	High	KLVIVGDGACGK	3xTMT6plex [N-Term; K1; K12]; 1xCarbamidomethyl [C10]	1.54059e-06	0	2	14	1	P08134; P61586	1	1904.16	High	Not Found	High	High	High	High	High	High	High	680		496.4	349.3	396.4	571.5	370.4	309.5	389.2	NotUnique	62.46	High	0	1.738e-06
FALSE	High	DYSNDWSPSDTVR	1xTMT6plex [N-Term]	0.000103519	0	1	3	1	G3V4K3	0	1770.81	High	Not Found	High	High	High	High	High	High	High	20		6.7	9.7	6.2	10.3	8.5	6.4	3.3	Unique	75.7	High	0	0.0001054
FALSE	High	VHTVEDYQAIVDAEWNILYDK	2xTMT6plex [N-Term; K21]	2.43568e-05	0	1	4	3	Q99832	0	2979.55	High	Not Found	High	High	High	High	High	High	High	69		30.7	19.1	14.2	36.4	16	6.6	21.9	Unique	48.88	High	0.001104	0.009705
FALSE	High	LWAGDQILEVNGIDLR	1xTMT6plex [N-Term]; 1xDeamidated [N11]	0.00010717	0	1	7	1	O75970	0	2042.11	High	Not Found	Not Found	High	High	High	High	Not Found	Not Found	6.5			1.5	1.8	1.8	1.5			Unique	54.98	High	0	0.0001096
FALSE	High	DSAIPVESDTDDEGAPR	1xTMT6plex [N-Term]	2.73169e-05	0	1	2	1	C9JA08	0	2002.94	High	High	High	High	High	High	High	High	High	109.9	2.7	42	46.9	69.4	60.9	74.5	44.8	43.3	Unique	47.78	High	0	2.87e-05
FALSE	High	DDVAQTDLLQIDPNFGSKEDFDSLLQSAK	3xTMT6plex [N-Term; K18; K29]	1.6082e-05	0	1	6	1	P08195-4	1	3897.04	High	Not Found	High	Not Found	High	High	High	High	Not Found	5.9		2.5		2.5	7.1	3.3	2.5		Unique	43.23	High	0	1.71e-05
FALSE	High	SSVFAAEIMDAFDR	1xTMT6plex [N-Term]	2.04408e-08	0	1	1	1	Q9UMX3	0	1787.88	High	Not Found	High	High	High	High	High	High	High	36.5		13.5	24.4	33	36	23.7	17.5	28.1	Unique	124.59	High	0	2.576e-08
FALSE	High	GDVDMSEVEHFMPILMEK	2xTMT6plex [N-Term; K18]	3.81815e-05	0	1	4	2	Q9BXS5-2	0	2565.28	High	High	High	High	High	High	High	High	High	482.2	24.8	237.3	160.8	117.9	230.4	128.2	100.4	148.6	Unique	31.01	High	0	3.967e-05
FALSE	High	TVYFDFQVGEDPPLFPSENR	1xTMT6plex [N-Term]	7.83646e-05	0	1	3	1	Q86XR7-2	0	2586.27	High	Not Found	High	High	High	High	High	High	High	47.4		18.6	26.4	28.9	26.3	41.8	27.5	18.2	Unique	57.58	High	0	8.077e-05
FALSE	High	EEIVDKYDLFVGSQATDFGEALVRHDEF	2xTMT6plex [N-Term; K6]	1.25556e-05	0	2	10	1	O43852-4; O43852-3	2	3687.86	High	Not Found	High	High	High	High	High	High	High	29.3		8.2	8.2	41	9.9	37.4	17.7	11.8	NotUnique	34.8	High	0	1.351e-05
FALSE	High	EREMVATQQEMMDAQLR	1xTMT6plex [N-Term]	2.83785e-07	0	1	1	1	P17568	1	2295.11	High	Not Found	High	High	High	High	High	High	High	15.4		14.3	13.2	31.6	28.4	25.8	12.3	16.1	Unique	62.6	High	0	3.352e-07
FALSE	High	EAVAPVQEESDLEK	2xTMT6plex [N-Term; K14]	3.75152e-05	0	1	18	2	Q13409-2	0	2002.07	High	Not Found	High	High	High	High	High	High	High	373.8		217.5	119.1	182.2	209.6	154.6	93.8	139.6	Unique	55.35	High	0	0.0001447
FALSE	High	IIQNGAIFQETLSGAESTSLVAAR	1xTMT6plex [N-Term]; 1xDeamidated [Q/N]	2.83785e-07	0	1	5	2	P29323-3	0	2706.45	High	High	High	High	High	High	High	High	High	44.3	2	15.5	26.6	45.3	17.2	29.8	18.8	10.4	Unique	61.54	High	0	3.354e-07
FALSE	High	NDYGTSGFSEEVLYYTSGCAPSMPASPVLTK	2xTMT6plex [N-Term; K31]; 1xCarbamidomethyl [C19]	4.11672e-07	0	1	3	1	Q9Y2H6	0	3786.83	High	Not Found	High	High	High	High	High	High	High	112.6		22.5	23.6	44.1	32.6	41.8	28	30.2	Unique	57.75	High	0	4.794e-07
FALSE	High	AMEELQDQEGWEYASLIGWK	2xTMT6plex [N-Term; K20]	5.41749e-07	0	2	6	4	Q9NZM1; Q9NZM1-3	0	2841.42	High	High	High	High	High	High	High	High	High	340.3	1.5	220.5	198.8	205.1	265	239.4	153.2	217.3	NotUnique	75.56	High	0	8.396e-07
FALSE	High	IPEAPAGPPSDFGLFLSDDDPK	2xTMT6plex [N-Term; K22]	9.38182e-07	0	1	1	1	Q9Y490	0	2743.42	High	Not Found	High	High	High	High	High	High	High	111.9		92.5	45	39.2	83.8	52.2	31.3	38.8	Unique	42.48	High	0	1.07e-06
FALSE	High	EGVILTNESAASTGQPDNDVTEGQR	1xTMT6plex [N-Term]	6.58072e-08	0	1	3	1	Q08J23	0	2817.37	High	Not Found	High	High	High	High	High	High	High	13.2		0.9	6	7.3	2.1	6.3	3.7	2.6	Unique	57.8	High	0	8.063e-08
FALSE	High	GQLTTDQVFPYPSVLNEEQTQFLK	2xTMT6plex [N-Term; K24]	2.29439e-07	0	1	5	3	P49748-3	0	3240.72	High	Not Found	High	High	High	High	High	High	High	213.4		162.5	134.1	200.1	213.9	178.4	115.7	204	Unique	70.74	High	0	2.713e-07
FALSE	High	GQLTTDQVFPYPSVLNEEQTQFLK	2xTMT6plex [N-Term; K24]; 1xDeamidated [N16]	6.64157e-07	0	1	5	1	P49748-3	0	3241.7	High	Not Found	High	High	High	High	High	High	High	9.3		8.8	6.1	8.4	6.1	3.4	1.3	8.8	Unique	59.38	High	0	7.647e-07
FALSE	High	IQDLLAEGTITGVIDDR	1xTMT6plex [N-Term]	4.65853e-08	0	1	1	2	Q96HY6	0	2058.13	High	High	High	High	High	High	High	High	High	128.4	8	72.8	74.8	86.7	113.9	95.5	60.3	103.5	Unique	87.74	High	0	5.743e-08
FALSE	High	FADDTYTESYISTIGVDFK	2xTMT6plex [N-Term; K19]	3.50874e-08	0	2	4	7	P62820; Q9H0U4	0	2630.33	High	Not Found	High	High	High	High	High	High	High	635.7		263.4	259.2	447.2	358.9	483.5	310.9	333.6	NotUnique	69.1	High	0	4.378e-08
FALSE	High	VIVESASNIPK	2xTMT6plex [N-Term; K11]	1.9224e-06	0	2	6	2	Q9NZM1; Q9NZM1-3	0	1614.98	High	Not Found	High	High	High	High	High	High	High	390.6		283.4	241.9	256.9	332.3	307.7	200.2	264.5	NotUnique	80.57	High	0	2.159e-06
FALSE	High	DYEEIGPSICR	1xTMT6plex [N-Term]; 1xCarbamidomethyl [C10]	0.000129603	0	1	2	2	P61158	0	1567.76	High	High	High	High	High	High	High	High	High	95	2.3	57	68.8	72.5	62.9	80.2	55.4	55	Unique	56.95	High	0	0.0001316
FALSE	High	TSTTSSMVASAEQPR	1xTMT6plex [N-Term]	1.68216e-08	0	1	4	1	P41236	0	1781.89	High	Not Found	High	High	High	High	High	Not Found	High	3.8		3.2	1.9	1.6	11.3	3.3		3.7	Unique	86.37	High	0	2.131e-08
FALSE	High	FASAQFPNGPQFAEDPSQLPSTQLPSSPFGDYR	1xTMT6plex [N-Term]	1.86886e-05	0	1	1	1	Q99595	0	3812.84	High	Not Found	High	High	High	High	High	High	High	59.3		15	20.9	40.6	25.5	42.2	30.2	23.3	Unique	50.59	High	0	1.992e-05
FALSE	High	SATEAELGGDAWR	1xTMT6plex [N-Term]	6.81805e-08	0	1	4	1	O95985	0	1591.79	High	Not Found	High	High	High	High	High	High	High	31.2		15.2	18.2	28.5	19.8	26.8	19.5	18.2	Unique	94.26	High	0	8.318e-08
FALSE	High	RLPNNHIGISFIPR	1xTMT6plex [N-Term]; 1xDeamidated [N]	4.31859e-05	0	1	10	5	O75369-8	1	1864.08	High	High	High	High	High	High	High	High	High	88.9	16.8	126.8	63	38.2	56.3	36.6	27.4	33.3	Unique	36.92	High	0.0002569	0.001121
FALSE	High	LGGTIDDCELVEGLVLTQK	2xTMT6plex [N-Term; K19]; 1xCarbamidomethyl [C8]	1.88865e-06	0	1	2	2	P50991	0	2518.38	High	Not Found	High	High	High	High	High	High	High	453.8		170.3	112.9	102.2	185.1	77.2	69.2	109.8	Unique	52.86	High	0	2.126e-06
FALSE	High	EGTGTEMPMIGDR	1xTMT6plex [N-Term]	7.45207e-07	0	1	1	1	Q02790	0	1622.77	High	Not Found	High	High	High	High	High	High	High	49.1		39.9	14.1	12.8	50.8	14.9	6.2	20.7	Unique	92.88	High	0	8.547e-07
FALSE	High	AVAGEFSEPVTLETPAFMFR	1xTMT6plex [N-Term]	4.95816e-06	0	1	2	1	Q9BTV5	0	2428.24	High	High	High	High	High	High	High	High	High	34.3	7.5	28.3	35.4	34.7	41.4	49	37.9	28.7	Unique	47.07	High	0	5.441e-06
FALSE	High	SMSDVSAEDVQNLR	1xTMT6plex [N-Term]	4.19051e-06	0	1	15	1	Q8WWI1-3	0	1779.87	High	Not Found	High	High	High	High	High	High	High	28.8		14.6	17.2	20.2	19.7	32.5	24.4	32.5	Unique	49.04	High	0	4.601e-06
FALSE	High	SLEELLLDANQLR	1xTMT6plex [N-Term]	0.000135301	0	2	7	2	A0A0G2JPP5; Q9BTT6	0	1742.98	High	High	High	High	High	High	High	High	High	214.5	21.2	178.2	131.9	155.9	226.9	155.3	115.6	138.3	NotUnique	43.16	High	0	0.0001371
FALSE	High	KNIYLNSGLTSTK	3xTMT6plex [N-Term; K1; K13]	3.68604e-05	0	1	2	1	P78536	1	2126.28	High	Not Found	High	High	High	High	High	High	Not Found	19.9		5	8.9	9.2	7.3	10.7	9.8		Unique	33.8	High	0	3.838e-05
FALSE	High	WIQEAETTVNVLVDASHR	1xTMT6plex [N-Term]	7.99655e-08	0	1	3	1	P46939	0	2297.21	High	High	High	High	High	High	High	High	High	62	2.9	52.5	42	28.2	61.1	46.5	26.3	37.5	Unique	77.39	High	0	9.697e-08
FALSE	High	WIQEAETTVNVLVDASHR	2xTMT6plex [N-Term; S16]	4.79891e-05	0	1	3	1	P46939	0	2526.37	High	Not Found	High	High	High	High	High	High	High	13.3		8.7	7.5	17.3	23.5	18.4	11.4	13.6	Unique	34.74	High	0	4.987e-05
FALSE	High	GLLSSLDHTSIR	1xTMT6plex [N-Term]	6.58002e-05	0	1	1	2	P08574	0	1527.87	High	High	High	High	High	High	High	High	High	27.3	160	81.6	96.3	24.6	22.2	17.6	12.9	12.5	Unique	57.22	High	0	6.802e-05
FALSE	High	VEECALGQDLCR	1xTMT6plex [N-Term]; 2xCarbamidomethyl [C4; C11]	6.69927e-06	0	2	9	1	Q03405-2; Q03405	0	1678.81	High	High	Not Found	High	High	High	High	High	High	83.8	1.4		27.6	44.4	7	43.3	23.8	1.1	NotUnique	68.97	High	0	7.303e-06
FALSE	High	GAIYLAEEACPGISDTMVAQLVQR	1xTMT6plex [N-Term]; 1xCarbamidomethyl [C10]	2.95733e-05	0	1	6	2	Q9Y6E0	0	2821.44	High	High	High	High	High	High	High	High	High	22.8	1.3	20.6	12.5	22.8	26	19.3	5.7	15.7	Unique	50.05	High	0	3.115e-05
FALSE	High	DVMQQQLAEYQELLDVK	2xTMT6plex [N-Term; K17]	1.90545e-06	0	1	1	1	Q03252	0	2508.34	High	Not Found	High	High	High	High	High	High	High	132		21.3	98.7	63.5	88.9	52.8	39.8	57.4	Unique	51.7	High	0	2.144e-06
FALSE	High	VSEEAESQQQWDTSKGEQVSQNGLPAEQGSPR	2xTMT6plex [N-Term; K15]; 1xDeamidated [Q/N]	6.18509e-08	0	2	4	6	Q01082; Q01082-3	1	3945.91	High	Not Found	High	High	High	High	High	High	High	15.7		26.5	12.8	22.3	33.6	18.1	10.8	15.1	NotUnique	98.42	High	0	7.605e-08
FALSE	High	FGNSEFDPPGPNVATTTVSDDVSMTFITSK	2xTMT6plex [N-Term; K30]; 1xDeamidated [N12]	1.90545e-06	0	1	3	1	O75821	0	3620.77	High	Not Found	High	High	High	High	High	High	High	9.1		0.8	1.6	2.6	3.8	2.3	2.4	2.3	Unique	66.67	High	0	2.136e-06
FALSE	High	ESSLILAVTPANMDLANSDALK	2xTMT6plex [N-Term; K22]	2.48386e-08	0	2	6	1	P50570; P50570-4	0	2731.5	High	Not Found	High	High	High	High	High	High	High	103.4		79.6	53.5	74.9	81.9	79.7	67.1	53.8	NotUnique	71.24	High	0	3.105e-08
FALSE	High	ILYSQCGDVMR	1xTMT6plex [N-Term]; 1xCarbamidomethyl [C6]	5.66968e-05	0	4	10	4	G8JLA2; G3V1V0; J3KND3; P14649	0	1570.79	High	High	High	High	High	High	High	High	High	203.9	5.1	113.7	106.1	159.5	198.3	159.5	104.2	125.5	NotUnique	72.88	High	0	5.863e-05
FALSE	High	DASIVGFFDDSFSEAHSEFLK	2xTMT6plex [N-Term; K21]	4.22284e-10	0	1	1	5	P30101	0	2806.4	High	High	High	High	High	High	High	High	High	1111.4	4.6	330.8	455.3	266.9	194.1	281.2	187.2	201.4	Unique	89.46	High	0	5.887e-10
FALSE	High	AVTELNEPLSNEDR	1xTMT6plex [N-Term]	2.66625e-08	0	1	1	2	Q04917	0	1815.93	High	High	High	High	High	High	High	High	High	246.2	32.3	197.1	124.4	111.3	246.3	143.4	103.3	135.9	Unique	108.37	High	0	3.351e-08
FALSE	High	GLCVDALIELSDENADWK	2xTMT6plex [N-Term; K18]; 1xCarbamidomethyl [C3]	4.86948e-08	0	1	2	1	Q12841	0	2506.29	High	Not Found	High	Not Found	High	Not Found	High	High	Not Found										NoQuanValues	56.46	High	0	6.003e-08
FALSE	High	NVQDAIADAEQR	1xTMT6plex [N-Term]	6.52373e-06	0	1	1	1	cRAP053	0	1558.8	High	Not Found	High	High	High	High	High	High	High	24.4		11.4	36.9	49.3	26	19.6	21.2	27.5	Unique	83.34	High	0	7.084e-06
FALSE	High	DPAEGDGAQPEETPR	1xTMT6plex [N-Term]	3.27036e-06	0	2	5	2	Q14697; Q14697-2	0	1797.85	High	High	High	High	High	High	High	High	High	275.2	8.8	42.6	79	63.1	51.1	69.4	43.8	47.7	NotUnique	52.79	High	0	3.621e-06
FALSE	High	DLPQDPVELAMFGLR	1xTMT6plex [N-Term]	1.9224e-06	0	1	6	1	Q9BQ95	0	1930.03	High	High	High	High	High	High	High	High	High	59.8	2.4	40	33.8	56.5	53.5	66.6	39.6	52.6	Unique	66.15	High	0	2.165e-06
FALSE	High	HLCEPGADGAETFADGVPR	1xTMT6plex [N-Term]; 1xCarbamidomethyl [C3]	7.99048e-10	0	1	6	1	Q14839-2	0	2228.06	High	Not Found	High	High	High	High	High	High	High	45.7		4	25	13.8	21.1	16.3	9.3	15.5	Unique	107.27	High	0	1.092e-09
FALSE	High	ANQNFDEMEGIR	1xTMT6plex [N-Term]	4.87115e-06	0	1	4	1	Q9ULH0	0	1652.79	High	Not Found	High	High	High	High	High	High	High	21.4		18.5	7.9	10.8	24.7	10.8	7.5	19.9	Unique	95.68	High	0	5.346e-06
FALSE	High	TMLETEEGILLLVR	1xTMT6plex [N-Term]	1.11012e-06	0	1	6	1	O60610	0	1846.06	High	Not Found	High	High	High	High	High	High	High	14.5		8.8	3	5.6	12.3	8.1	3.3	2.6	Unique	68.91	High	0	1.267e-06
FALSE	High	QPTVTSVCSETSQELAEGQR	1xTMT6plex [N-Term]; 1xCarbamidomethyl [C8]	1.30159e-07	0	1	1	2	Q96HC4	0	2436.19	High	High	High	High	High	High	High	High	High	185	9.4	128.3	89.2	95.6	119	143	105.3	104.9	Unique	79.74	High	0	3.108e-07
FALSE	High	REDSFESLDSLGSR	1xTMT6plex [N-Term]	1.68326e-06	0	1	8	1	Q8WWI1-3	1	1826.91	High	Not Found	High	High	High	High	High	High	High	52.3		49.9	42.6	54.1	76.5	70.8	38.1	40.7	Unique	43.31	High	0	1.897e-06
FALSE	High	EFDELNPSAQR	1xTMT6plex [N-Term]	2.05955e-05	0	1	6	2	P16615	0	1534.77	High	High	High	High	High	High	High	High	High	234.8	8	86.5	109.6	133.4	115.1	134.5	74.7	100.5	Unique	75.49	High	0	2.178e-05
FALSE	High	VTAGGPCSFGSGSTPVIGGNTFNLK	2xTMT6plex [N-Term; K25]; 1xCarbamidomethyl [C7]	6.87954e-06	0	1	1	1	P78504	0	2883.51	High	Not Found	High	High	High	High	High	High	High	104.7		10.4	32.9	65.2	8	60.5	44.6	7.4	Unique	77.76	High	0	7.468e-06
FALSE	High	LPIVNEDDELVAIIAR	1xTMT6plex [N-Term]	4.87115e-06	0	1	3	1	P12268	0	2009.15	High	High	High	High	High	High	High	High	High	68.8	8.9	62.4	31.9	32.6	70.2	28.3	31.7	39.9	Unique	62.13	High	0	5.34e-06
FALSE	High	DPDVTVAPVFLLGESSVEYGK	2xTMT6plex [N-Term; K21]	3.15493e-08	0	1	6	1	Q9Y5Q0	0	2680.45	High	Not Found	High	High	High	High	High	High	High	133.9		116.4	66	38.9	96.5	45.9	45	101.8	Unique	71.39	High	0	3.924e-08
FALSE	High	VWGNVVTVEWADPVEEPDPEVMAK	2xTMT6plex [N-Term; K24]	7.65013e-08	0	2	5	1	O43390; O43390-2	0	3154.62	High	Not Found	High	High	High	High	High	High	High	133.5		24.9	70	54.5	53	55.7	44.9	41.3	NotUnique	40.55	High	0	9.304e-08
FALSE	High	LQDISELLATGAGLSESEAEPDGDHNITELPQAVAGR	1xTMT6plex [N-Term]	4.91446e-06	0	1	6	1	A0A0B4J1V8	0	4033.02	High	Not Found	Not Found	High	Not Found	High	High	Not Found	Not Found	1.7			1.9		3.2	1.7			Unique	55.45	High	0	5.406e-06
FALSE	High	EDEMEENLTQVGSILGNLK	2xTMT6plex [N-Term; K19]	2.15696e-06	0	1	5	2	O00161	0	2577.35	High	Not Found	High	High	High	High	High	High	High	467.3		226.3	132.1	99.3	214.3	122.8	90.9	203.1	Unique	55.64	High	0	2.407e-06
FALSE	High	EDEMEENLTQVGSILGNLK	2xTMT6plex [N-Term; K19]; 1xDeamidated [Q/N]	9.2991e-07	0	1	5	2	O00161	0	2578.33	Not Found	Not Found	Not Found	Not Found	Not Found	Not Found	Not Found	Not Found	High									1.6	Unique	59.1	High	0	3.666e-06
FALSE	High	QYPEFPWTDVQAEIFR	1xTMT6plex [N-Term]	1.98807e-05	0	1	1	1	Q14166	0	2255.13	High	Not Found	High	High	High	High	High	High	High	45.1		26.2	13.8	16.3	27.8	16.8	9.9	16.3	Unique	34.49	High	0	2.105e-05
FALSE	High	NSVSQISVLSGGK	3xTMT6plex [N-Term; K13; S]	1.1698e-05	0	1	1	3	O15143	0	1963.18	High	Not Found	High	High	High	High	High	High	High	245.5		30.9	29.6	289.8	316.9	381.2	377	292.4	Unique	42.82	High	0	1.252e-05
FALSE	High	LEGELQAPDLELSLPAIHVEGLDIK	2xTMT6plex [N-Term; K25]	9.71699e-08	0	1	1	5	Q09666	0	3157.78	High	Not Found	High	High	High	High	High	High	High	487.8		282	243.6	309.9	379.5	324.4	230.9	299.2	Unique	91.11	High	0	1.18e-07
FALSE	High	DCEQAENWMAAR	1xTMT6plex [N-Term]; 1xCarbamidomethyl [C2]	3.83543e-06	0	2	5	2	Q13813-3; A0A0D9SGF6	0	1709.76	High	High	High	High	High	High	High	High	High	298.5	8.3	99.8	95.8	108.4	147.7	84.4	60.2	112.4	NotUnique	81.75	High	0	4.226e-06
FALSE	High	LEGELQAPDLELSLPAIHVEGLDIK	3xTMT6plex [N-Term; S13; K25]	6.52496e-07	0	1	1	1	Q09666	0	3386.94	High	Not Found	High	High	High	High	High	High	High	39.6		13.6	13.2	27.9	38.5	32.6	25.6	26.8	Unique	58.5	High	0	7.545e-07
FALSE	High	FMQDPMEIFVDDETK	2xTMT6plex [N-Term; K15]	7.12744e-06	0	1	11	1	Q13838-2	0	2303.13	High	Not Found	High	High	High	High	High	High	High	153.9		30.5	83.7	52.3	91.6	55.2	51.6	62.7	Unique	41.44	High	0	7.72e-06
FALSE	High	SEIHLFLQR	2xTMT6plex [N-Term; S1]	0.000122013	0	1	1	1	Q15477	0	1600.96	High	High	High	High	High	High	High	High	High	113.5	1.1	18.4	44.1	102.1	62.8	89.6	82.7	66.3	Unique	38.65	High	0	0.000124
FALSE	High	DATIASLEETNR	1xTMT6plex [N-Term]	1.2445e-05	0	1	3	1	O75116	0	1548.81	High	Not Found	High	High	High	High	High	High	High	67.9		50.8	25.6	33.6	51.4	36.7	21.7	28.9	Unique	61.95	High	0	1.338e-05
FALSE	High	TVTLQGNLDPCALYASEEEIGQLVK	2xTMT6plex [N-Term; K25]; 1xCarbamidomethyl [C11]	8.21189e-08	0	1	2	1	P06132	0	3206.7	High	Not Found	High	High	High	High	High	High	High	24.8		15.3	12.8	12.1	33.1	10	8.5	14.8	Unique	72.47	High	0	9.971e-08
FALSE	High	NADNNSSAFTALSEER	1xTMT6plex [N-Term]	1.69578e-05	0	2	6	1	Q14789-2; Q14789	0	1954.93	High	Not Found	High	High	High	High	High	High	High	64.7		14.4	12.1	28.7	35.9	34.8	26.4	28.3	NotUnique	40.87	High	0	1.803e-05
FALSE	High	SLEELPSGPPPETLSLDWVYGYR	1xTMT6plex [N-Term]	1.30076e-05	0	1	6	1	B7WPE2	0	2834.44	High	High	High	High	High	High	High	High	High	48.7	6.9	37.1	38.6	45.7	48.6	53.4	33.8	30	Unique	52.59	High	0	1.393e-05
FALSE	High	GIHPTIISESFQK	2xTMT6plex [N-Term; K13]	6.99544e-05	0	1	2	1	P50991	0	1915.11	High	High	High	High	High	High	High	High	High	45.9	37.2	278.4	169.4	18.5	38.2	24	16.4	18.8	Unique	47.02	High	0	7.175e-05
FALSE	High	APPPVFYNKPPEIDITCWDADPVPEEEEGFEGGD	2xTMT6plex [N-Term; K9]; 1xCarbamidomethyl [C17]	2.35119e-05	0	1	3	2	Q16643-3	0	4275.02	High	Not Found	High	High	High	High	High	High	High	197.8		171.8	38.9	90	139	54.3	32.2	25.5	Unique	23.8	High	0.001978	0.01731
FALSE	High	VGEVTYVELLMDAEGK	2xTMT6plex [N-Term; K16]	1.35956e-05	0	1	6	1	P52272	0	2211.2	High	Not Found	High	High	High	High	High	High	High	287.1		36.4	156.9	88.3	148.3	114.4	78.3	97.9	Unique	50.46	High	0	1.459e-05
FALSE	High	VLIFDDSFEHEVWQDASSFR	2xTMT6plex [N-Term; S]	6.87954e-06	0	1	2	3	Q12797	0	2885.45	High	High	High	High	High	High	High	High	High	249.6	1.2	59	114.2	229.7	124.9	202.3	136.9	88.1	Unique	41.9	High	0	3.424e-05
FALSE	High	VEYTLGEESEAPGQR	1xTMT6plex [N-Term]	7.38636e-07	0	2	12	2	E9PGM1; Q04637	0	1893.94	High	High	High	High	High	High	High	High	High	213.8	13.2	91.4	102.6	120.1	109.8	139.8	98.4	78.2	NotUnique	36.62	High	0	3.645e-05
FALSE	High	DLAGCIHGLSNVK	2xTMT6plex [N-Term; K13]; 1xCarbamidomethyl [C5]	5.52247e-05	0	1	2	2	P48735	0	1842.03	High	Not Found	High	High	High	High	High	High	High	341.1		181.8	200.6	300.5	263.2	236	148.8	215.1	Unique	44.74	High	0	5.711e-05
FALSE	High	VPDITECKEEDIMCMYEAEMQWK	3xTMT6plex [N-Term; K8; K23]; 2xCarbamidomethyl [C7; C14]	6.1318e-06	0	1	3	1	O96000	1	3622.72	High	Not Found	High	High	High	High	High	High	High	2.7		1.8	1.5	2.5	1.6	2	1.5	1.8	Unique	40.96	High	0	6.667e-06
FALSE	High	NATNVEQSFMTMAAEIK	2xTMT6plex [N-Term; K17]	1.52514e-05	0	1	4	2	P62820	0	2343.21	High	Not Found	High	High	High	High	High	High	High	80.5		23.2	23.2	75.8	56.4	64.8	45.7	54.6	Unique	39.85	High	0	1.62e-05
FALSE	High	LMDLDVEQLGIPEQEYSCVVK	2xTMT6plex [N-Term; K21]; 1xCarbamidomethyl [C18]	2.04484e-07	0	1	1	1	P12004	0	2923.52	High	Not Found	High	High	High	High	High	High	High	100		39.9	51.8	37.5	71.3	35.8	43.6	60.9	Unique	54.58	High	0	2.44e-07
FALSE	High	RQPMPDPGLMPLPDTAADLDWSNLVDAAK	2xTMT6plex [N-Term; K29]	2.88013e-05	0	1	4	1	O43166	1	3592.85	High	Not Found	High	High	High	High	High	High	High	11		6.1	8.7	9.2	15.6	5.8	6.9	3.3	Unique	31.57	High	0	3.038e-05
FALSE	High	MNGFIDQIDGIVHFETR	1xTMT6plex [N-Term]; 1xDeamidated [N2]	9.05526e-07	0	1	3	1	Q9BT78	0	2222.11	High	Not Found	High	High	High	High	High	High	High	24		20.9	13.3	16.6	32.1	22.8	11.6	27.8	Unique	52.06	High	0	1.039e-06
FALSE	High	QTEDVAEVLNR	1xTMT6plex [N-Term]	6.63784e-05	0	2	8	1	O75122; O75122-3	0	1502.8	High	High	High	High	High	High	High	High	High	81.1	6.3	42.7	42.3	42.4	58.7	64.5	47.3	42.3	NotUnique	67.18	High	0	6.853e-05
FALSE	High	RVGDPPQPLPEEPMEVQGAER	1xTMT6plex [N-Term]	7.00239e-06	0	1	10	1	P46379-3	1	2560.3	High	High	High	High	High	High	High	High	High	35.2	1.7	24	21.8	13.1	37.4	28.1	16.7	18.6	Unique	29.57	High	0	7.632e-06
FALSE	High	ADCEGPEEQQGAEEEEDGAASQGGLYEAIAGHWIQVLQCR	1xTMT6plex [N-Term]; 2xCarbamidomethyl [C3; C39]	1.48542e-09	0	1	2	1	Q8IVL6	0	4617.07	High	Not Found	High	High	High	High	High	High	Not Found	10.9		1.6	7.1	9.2	1.7	2.2	1.4		Unique	74.2	High	0	1.993e-09
FALSE	High	IEDANLIPPVPDDKFQDLVDAVR	2xTMT6plex [N-Term; K14]	1.80397e-05	0	1	2	2	P07996	1	3037.66	High	High	High	High	High	High	High	High	High	322.2	1.8	26.6	122.2	330	41.4	442	155	27.4	Unique	52.01	High	0	1.914e-05
FALSE	High	MPHGYDTQVGER	1xTMT6plex [N-Term]	2.76343e-07	0	1	5	1	O75027-2	0	1618.78	High	High	High	High	High	High	High	High	High	60.7	2	32	33.1	47.8	52.3	52.4	25.7	39.9	Unique	62.55	High	0	3.265e-07
FALSE	High	LFDSTTLEHQK	2xTMT6plex [N-Term; K11]	3.31635e-05	0	1	1	2	Q13347	0	1776.99	High	Not Found	High	High	High	High	High	High	High	257		169	122.8	120.8	114.5	150.1	87.2	86.7	Unique	37.83	High	0	3.482e-05
FALSE	High	FTAPQAELYEAVLEIQR	1xTMT6plex [N-Term]	3.10115e-06	0	1	3	1	Q9NQH7	0	2207.19	High	Not Found	High	High	High	High	High	High	High	76.1		30.3	38	62.7	57.5	46.1	34	49.7	Unique	64.87	High	0	3.456e-06
FALSE	High	TVECPPVQQTACPPDSYETQVR	1xTMT6plex [N-Term]; 2xCarbamidomethyl [C4; C12]	5.18096e-08	0	1	2	1	Q9NZV1	0	2791.32	High	Not Found	High	High	High	High	High	High	High	88.7		1.3	8.6	49	2	61.1	7.2	4.4	Unique	62.11	High	0	6.398e-08
FALSE	High	DASIVGFFDDSFSEAHSEFLK	4xTMT6plex [N-Term; S3; S13; K21]	3.60493e-06	0	1	1	1	P30101	0	3264.72	High	Not Found	High	High	High	High	High	High	High	113.4		13.3	10.4	50	42.6	49.8	33.9	31.2	Unique	24.43	High	0	3.979e-06
FALSE	High	GSVTLSDLPGFLGDLASEEDSIEKDKEEAAISR	3xTMT6plex [N-Term; K24; K26]	2.45727e-05	0	1	2	1	Q92574	2	4166.2	High	Not Found	High	High	High	High	High	High	High	14.9		20.7	9	11.2	22.4	13.3	10.3	12.4	Unique	43.43	High	0	2.596e-05
FALSE	High	SFEAPATINSASLHPEK	2xTMT6plex [N-Term; K17]	1.3961e-05	0	1	2	1	Q9Y3F4-2	0	2257.22	High	Not Found	High	High	High	High	High	High	High	232.2		131.1	120.1	53	82	68.4	64.4	70.4	Unique	52.78	High	0	1.498e-05
FALSE	High	LLEQALVIEEQLR	1xTMT6plex [N-Term]	4.75694e-05	0	1	11	1	Q14839-2	0	1783.05	High	Not Found	High	High	High	High	High	High	High	52.4		6.9	40	20.1	26.1	19	12.3	26	Unique	56.17	High	0	4.941e-05
FALSE	High	GQYPEDSSSDGLR	1xTMT6plex [N-Term]	1.22372e-06	0	1	7	1	Q15011	0	1639.78	High	High	High	High	High	High	High	High	High	15.8	8.1	12.7	5.6	9.1	14.2	17.3	8.6	17.2	Unique	77.5	High	0	1.393e-06
FALSE	High	AGDIALLYLQEIER	1xTMT6plex [N-Term]	3.75152e-05	0	1	3	1	Q86TV6-2	0	1833.03	High	High	High	High	High	High	High	High	High	37.7	2.2	29.8	17.1	12.9	18.7	15.9	6.7	12.3	Unique	61.59	High	0	3.927e-05
FALSE	High	SGVISDTELQQALSNGTWTPFNPVTVR	1xTMT6plex [N-Term]	2.73805e-08	0	1	5	2	O75340-2	0	3146.63	High	Not Found	High	High	High	High	High	High	High	38.8		15.7	12.1	22.2	27.6	28.6	12.4	18.7	Unique	77.62	High	0	3.418e-08
FALSE	High	SGVISDTELQQALSNGTWTPFNPVTVR	1xTMT6plex [N-Term]; 1xDeamidated [N/Q]	3.04511e-08	0	1	5	5	O75340-2	0	3147.62	High	Not Found	High	High	High	High	High	High	High	76.5		31.9	27.4	45.6	51.7	51.5	26.3	28.3	Unique	105.13	High	0	3.814e-08
FALSE	High	EPVQTLYSQSPALELDKFLEDVR	2xTMT6plex [N-Term; K17]	4.00904e-06	0	1	2	1	Q9UHY1	1	3135.7	High	Not Found	High	High	High	High	High	High	High	7.7		9.7	6.7	6	12.1	6.2	4.7	3.2	Unique	55.34	High	0	4.409e-06
FALSE	High	QLQVDLQILRDENYYQLEELAFR	1xTMT6plex [N-Term]	1.12996e-06	0	2	9	1	E9PLY5; Q9UPN3	1	3125.65	High	Not Found	High	High	High	High	High	High	High	2.2		8.7	3.4	11.2	8.5	8.9	6.3	2.1	NotUnique	66.94	High	0	1.291e-06
FALSE	High	GTVYPVVYVDDSAILDCQFSEFYHTPPPGFEK	2xTMT6plex [N-Term; K32]; 1xCarbamidomethyl [C17]	2.00742e-09	0	1	2	1	Q5W111	0	4136.04	High	Not Found	High	High	High	High	High	High	High	55.6		32.5	49.8	32.8	18.8	44.7	24.7	17.5	Unique	128.54	High	0	2.687e-09
FALSE	High	QEYPGMILQISGSLPSLSGMEMACDYGNNIR	1xTMT6plex [N-Term]; 1xCarbamidomethyl [C24]	3.11796e-05	0	1	2	2	Q9Y4D7	0	3660.74	High	Not Found	High	High	High	High	High	High	High	28.2		2.6	10.8	14.6	7.7	18.1	13	4.1	Unique	73.16	High	0	3.273e-05
FALSE	High	FGDQDVWILPQAEWQPGETLR	1xTMT6plex [N-Term]	3.65373e-05	0	1	2	1	Q9H2W6	0	2714.38	High	Not Found	High	High	High	High	High	High	High	63.6		15.6	11.5	27.9	27.9	26.8	14.9	20.9	Unique	34.3	High	0	3.819e-05
FALSE	High	HALTVSYFYDATR	1xTMT6plex [N-Term]	1.69578e-05	0	1	8	1	Q9NSC5	0	1772.92	High	Not Found	High	High	High	High	High	High	High	14.7		15.4	7.6	14.5	15.7	10.5	8.1	10.2	Unique	45.38	High	0	1.804e-05
FALSE	High	TVYFDFQVGDEPPILPDMGNR	1xTMT6plex [N-Term]	1.97059e-05	0	1	4	1	Q9Y3Q3	0	2639.3	High	Not Found	High	High	High	High	High	High	High	16.9		1.8	2.6	10.5	3.2	9.2	7.2	6.2	Unique	54.44	High	0	2.092e-05
FALSE	High	VLIFDDSFEHEVWQDASSFR	1xTMT6plex [N-Term]	1.0157e-07	0	1	2	3	Q12797	0	2656.29	High	High	High	High	High	High	High	High	High	188.7	10.5	61.4	113	128.9	72.3	141.2	72.5	52.3	Unique	73.17	High	0	1.229e-07
FALSE	High	LVEGLQGQTWAPDWVEELR	1xTMT6plex [N-Term]	1.16039e-06	0	1	3	2	A1L0T0	0	2455.28	High	High	High	High	High	High	High	High	High	63.8	2.7	32.1	24.3	35.6	46.8	35.2	22.3	42.8	Unique	63	High	0	1.315e-06
FALSE	High	IDCVSKNEDIPNVAVYPHNGMIDLK	3xTMT6plex [N-Term; K6; K25]; 1xDeamidated [N19]; 1xCarbamidomethyl [C3]	4.11696e-06	0	1	1	2	P54709	1	3529.86	High	Not Found	High	High	High	High	High	High	High	94.9		104.9	110.1	352.2	127	358.7	183.9	80.4	Unique	37.98	High	0	4.532e-06
FALSE	High	YPDLYPQEDEDEEEER	1xTMT6plex [N-Term]	4.09661e-05	0	1	2	1	Q8N4Q1-2	0	2284.99	High	High	High	High	High	High	High	High	High	164.6	2.2	51.3	72.5	92.4	109.5	97.7	57.4	99.6	Unique	38.19	High	0	4.266e-05
FALSE	High	GHTVTEPIQPLEPELPGEGQPEAR	1xTMT6plex [N-Term]	1.29011e-07	0	1	2	1	O15446-2	0	2810.45	High	High	High	High	High	High	High	High	High	58.2	8.1	13.2	51.2	40	23	73.3	42.1	26.4	Unique	69.64	High	0	1.555e-07
FALSE	High	QYATLDVYNPFETR	1xTMT6plex [N-Term]	4.00904e-06	0	1	1	1	O14828	0	1945.99	High	High	High	High	High	High	High	High	High	69.6	1.8	44.3	23.1	42.5	50.8	49.8	32.9	53.9	Unique	57.21	High	0	4.427e-06
FALSE	High	VITNQYNNPAGLYSSENISNFNNALESK	2xTMT6plex [N-Term; K28]	4.22777e-06	0	1	1	2	O00151	0	3559.81	High	Not Found	High	High	High	High	High	High	High	17.6		29.9	15.4	16.4	51.9	16	14.6	20.5	Unique	74.94	High	0	7.352e-05
FALSE	High	ENLISALEEAK	2xTMT6plex [N-Term; K11]	1.47386e-06	0	1	2	1	P22102	0	1674.97	High	Not Found	High	High	High	High	High	High	High	200.8		61.8	55	46.5	98.7	44	33.4	44.6	Unique	78.36	High	0	1.665e-06
FALSE	High	FREFLESQEDYDPCWSLQEK	2xTMT6plex [N-Term; K20]; 1xCarbamidomethyl [C14]	5.37904e-05	0	1	10	1	Q8N6T3	1	3064.48	High	Not Found	High	High	High	High	High	High	High	51.2		39.5	24.9	47.7	66.4	50	16.3	23.4	Unique	51.15	High	0	5.545e-05
FALSE	High	ANHGPGMAMNWPQFEEWSADLNR	1xTMT6plex [N-Term]	1.98896e-10	0	1	2	1	Q9UNF0	0	2887.32	High	High	High	High	High	High	High	High	High	30.8	1.7	26.4	29.9	26.1	34.4	25.4	18.2	15.8	Unique	88.75	High	0	2.828e-10
FALSE	High	EYATEVDVDFVR	1xTMT6plex [N-Term]	0.000137648	0	2	14	1	P63010-2; Q10567-3	0	1671.84	High	High	High	High	High	High	High	High	High	207.2	3.2	94.1	82.7	56.2	81.4	53.8	46.6	72	NotUnique	44.85	High	0	0.00014
FALSE	High	WKTPAAIPATPVAVSQPIR	2xTMT6plex [N-Term; K2]	7.30785e-05	0	2	9	1	P55196-5; P55196-1	1	2461.47	High	Not Found	High	High	High	High	High	High	High	17.1		70.9	30	69	93.3	89.2	52.8	40	NotUnique	40.68	High	0	7.543e-05
FALSE	High	LITDTDSFLHDAGLR	1xTMT6plex [N-Term]	2.93137e-05	0	1	4	2	Q9Y4B5	0	1903.01	High	High	High	High	High	High	High	High	High	69.9	7	51.8	60.5	41.8	32.3	49.6	26.5	26.8	Unique	31.82	High	0	3.072e-05
FALSE	High	YYGESLPFGDNSFK	2xTMT6plex [N-Term; K14]	3.3753e-05	0	1	11	1	P42785	0	2082.06	High	Not Found	High	High	High	High	High	High	High	366.6		125.7	194.7	308.8	140.6	308.5	219.9	99.8	Unique	32.89	High	0	3.54e-05
FALSE	High	EWTDGLFTHVLR	1xTMT6plex [N-Term]	7.71836e-06	0	1	1	2	Q14204	0	1702.91	High	High	High	High	High	High	High	High	High	332.6	24.4	191.9	155.3	200.2	202.3	178.3	100.9	144.1	Unique	50.05	High	0	8.411e-06
FALSE	High	ALGEPITLFGEGPAER	1xTMT6plex [N-Term]	4.97048e-05	0	1	2	1	O43172-2	0	1886.02	High	High	High	High	High	High	High	High	High	44.3	2.2	18.8	31.8	25.3	30.3	28.7	24.1	21.5	Unique	34.36	High	0	5.161e-05
FALSE	High	TSLATILDGGEENLEK	2xTMT6plex [N-Term; K16]	3.29945e-06	0	1	4	1	H0UI80	0	2148.18	High	Not Found	High	High	High	High	High	High	High	55.7		14.5	32.8	56.6	44.9	84.1	46.4	38.5	Unique	46.19	High	0	3.672e-06
FALSE	High	GSIYLAGQNIQDVSLESLR	1xTMT6plex [N-Term]	2.88906e-06	0	1	5	1	O75027-2	0	2292.24	High	High	High	High	High	High	High	High	High	68.2	8.2	33.7	39.2	44	51.1	43.3	26.2	40.5	Unique	66.67	High	0	3.21e-06
FALSE	High	DCYCTVNLDQEEVFR	1xTMT6plex [N-Term]; 2xCarbamidomethyl [C2; C4]	1.32525e-06	0	1	2	1	Q14644	0	2176.98	High	Not Found	Not Found	High	High	High	Not Found	High	Not Found	2.8			3.7	1.3	1.4		1.6		Unique	81.17	High	0	1.504e-06
FALSE	High	ELNEMQAQIAEESQIR	1xTMT6plex [N-Term]	8.21189e-08	0	1	3	1	O75116	0	2118.07	High	Not Found	High	High	High	High	High	High	High	6.9		7.7	2.7	8.2	9.9	5.5	6.2	5.9	Unique	79.31	High	0	1.001e-07
FALSE	High	GWDENVYYTVPLVR	1xTMT6plex [N-Term]	3.60493e-06	0	1	1	1	Q9BPW8	0	1940.01	High	High	High	High	High	High	High	High	High	79.9	13.7	71.7	52	86	100.1	65	38.3	63.9	Unique	47.37	High	0	3.986e-06
FALSE	High	IEGYEDQVLITEHGDLGNSR	1xTMT6plex [N-Term]; 1xDeamidated [N18]	1.29011e-07	0	1	1	2	P52907	0	2475.22	High	High	High	High	High	High	High	High	High	71.6	2.4	41.3	28.5	21.1	39	16.8	11.4	26.9	Unique	52.61	High	0	1.557e-07
FALSE	High	IEGYEDQVLITEHGDLGNSR	1xTMT6plex [N-Term]	2.8368e-08	0	1	1	3	P52907	0	2474.24	High	High	High	High	High	High	High	High	High	239.6	4.2	109.5	67	81.4	152.4	67.2	45	84.6	Unique	64.3	High	0	1.44e-07
FALSE	High	GLHVVEVTYDDVPIPNSPFK	2xTMT6plex [N-Term; K20]	1.69649e-09	0	1	10	3	O75369-8	0	2684.47	High	High	High	High	High	High	High	High	High	488.4	13.2	403.6	195.4	286.7	553.1	232.7	173.9	216.6	Unique	69.14	High	0	2.28e-09
FALSE	High	EINDCIGGTVLNISK	2xTMT6plex [N-Term; K15]; 1xCarbamidomethyl [C5]	1.36002e-08	0	1	2	1	O76021	0	2091.15	High	Not Found	High	High	High	High	High	High	High	29.1		15.4	17.5	15.6	29.4	18.3	13.6	12.2	Unique	97.53	High	0	1.731e-08
FALSE	High	GLHVVEVTYDDVPIPNSPFK	3xTMT6plex [N-Term; K20; S/T]	1.59405e-05	0	1	10	2	O75369-8	0	2913.63	High	Not Found	High	High	High	High	High	High	High	367.2		174.7	96.3	288.2	496	200.2	167.4	186	Unique	40.71	High	0	5.694e-05
FALSE	High	EELGDEWLKPELFR	2xTMT6plex [N-Term; K9]	5.97582e-05	0	1	3	1	Q9Y315	0	2219.21	High	Not Found	High	High	High	High	High	High	High	151.7		104.1	72.6	49.4	99.5	39.9	44.8	77.6	Unique	21.46	High	0	6.154e-05
FALSE	High	GAVVGIDLGTTNSCVAVMEGK	2xTMT6plex [N-Term; K21]; 1xCarbamidomethyl [C14]	8.50483e-09	0	1	1	7	P38646	0	2536.35	High	Not Found	High	High	High	High	High	High	High	363		204.4	217.6	296.6	308.6	296.4	205.2	272.2	Unique	77.86	High	0	7.344e-08
FALSE	High	FFGDSAASMAIKNPK	3xTMT6plex [N-Term; K12; K15]	7.65036e-06	0	2	11	1	Q9Y4L1; J3QL06	1	2271.28	High	Not Found	High	High	High	High	High	High	High	66.2		27.3	16	259.2	61.1	265.5	92	32.7	NotUnique	37.92	High	0	8.275e-06
FALSE	High	GAVVGIDLGTTNSCVAVMEGK	2xTMT6plex [N-Term; K21]; 1xDeamidated [N12]; 1xCarbamidomethyl [C14]	5.87201e-05	0	1	1	2	P38646	0	2537.34	High	Not Found	High	High	High	High	High	High	High	43.3		18.8	23.1	39.1	27.3	31	27.6	29.7	Unique	40.27	High	0	6.091e-05
FALSE	High	QPETVLTETPQDTIELNR	1xTMT6plex [N-Term]	8.35821e-06	0	1	4	2	P30260-2	0	2313.21	High	High	High	High	High	High	High	High	High	23	2.4	12.1	15.6	17.6	15.9	24.2	17.9	17.1	Unique	49.07	High	0	9.022e-06
FALSE	High	KILNQNELVNALK	3xTMT6plex [N-Term; K1; K13]	3.46569e-05	0	1	2	1	Q5NDL2	1	2184.37	High	Not Found	High	High	High	High	High	High	High	65.7		40.2	52.8	88.1	61.2	74.8	43.4	35.9	Unique	47.11	High	0	3.61e-05
FALSE	High	TGYAFVDCPDESWALK	2xTMT6plex [N-Term; K16]; 1xCarbamidomethyl [C8]	4.3952e-05	0	1	2	2	O00425	0	2317.16	High	Not Found	High	High	High	High	High	High	High	228.8		79.6	69.2	113.6	108.9	94.6	84.5	115.4	Unique	24.3	High	0	4.568e-05
FALSE	High	VESLPDELYFCK	2xTMT6plex [N-Term; K12]; 1xCarbamidomethyl [C11]	8.7363e-06	0	1	1	1	Q8TDW0	0	1958.03	High	High	High	High	High	High	High	High	High	62.1	1.1	10.7	23.3	14.6	15.4	22.7	11.8	18.6	Unique	44.51	High	0	9.474e-06
FALSE	High	QYESLSLFHPSNVEMLSSMDSASVR	3xTMT6plex [N-Term; S6; S11]	2.17162e-05	0	1	1	1	P78536	0	3501.8	High	Not Found	High	High	High	High	High	High	High	211.3		22.1	58.3	110.4	51	107.6	60	29.6	Unique	13.33	High	0	2.292e-05
FALSE	High	MLFSPEEMDLSQEQPLDAQQGPPEPAQESLSGSESKPK	3xTMT6plex [N-Term; K36; K38]	1.05233e-07	0	1	1	1	Q32P28	0	4829.41	High	Not Found	High	High	High	High	High	High	High	110.2		16.1	25.1	22.8	18.3	31.4	18.5	10.7	Unique	94.31	High	0	1.276e-07
FALSE	High	ENLEQAFEVAER	1xTMT6plex [N-Term]	4.538e-07	0	2	9	2	E9PLY5; Q9UPN3	0	1663.85	High	High	High	High	High	High	High	High	High	143.6	1.9	59.1	72.4	77.4	83.9	69.6	43.6	60.9	NotUnique	98.68	High	0	5.28e-07
FALSE	High	GTVVYGEPITASLGTDGSHYWSK	2xTMT6plex [N-Term; K23]	9.62034e-11	0	1	3	1	A0A1C7CYX9	0	2883.49	High	Not Found	High	Not Found	High	High	High	High	High	9.1		7		2.3	10.3	6.3	1.6	2.5	Unique	93.55	High	0	1.391e-10
FALSE	High	KLEHLITELVHQR	2xTMT6plex [N-Term; K1]	3.76811e-06	0	1	1	1	Q14204	1	2074.25	High	High	High	High	High	High	High	High	High	344.9	4.6	189.9	119.1	162.1	202.5	140.9	105.5	144.5	Unique	35.76	High	0	4.152e-06
FALSE	High	WLQDLQEENESLK	2xTMT6plex [N-Term; K13]	4.16932e-05	0	1	5	1	Q86UP2	0	2090.12	High	Not Found	High	High	High	High	High	High	High	145.1		85.1	78.6	110.1	126.4	142.4	76.9	118.7	Unique	35.19	High	0	4.341e-05
FALSE	High	SNTSPEELGPLANQLTSDYGR	1xTMT6plex [N-Term]	8.97244e-08	0	1	1	2	Q9Y490	0	2478.23	High	High	High	High	High	High	High	High	High	253.4	8.9	146.9	95.8	126.7	195.3	141.7	80.7	84.2	Unique	58.96	High	0	1.092e-07
FALSE	High	VVKLENGEIETIAR	2xTMT6plex [N-Term; K3]; 1xDeamidated [N6]	1.69578e-05	0	1	3	2	Q9HDC9	1	2030.19	High	Not Found	High	High	High	High	High	High	High	55.7		87.8	72.2	293.6	111.3	297.3	126.9	48.4	Unique	43.38	High	0	1.8e-05
FALSE	High	AVEDIHGLFSLSK	3xTMT6plex [N-Term; K13; S]	4.09661e-05	0	1	2	3	Q14152	0	2103.24	High	Not Found	High	High	High	High	High	High	High	1181.8		571.5	530.4	780.6	830.6	911.3	682	567.7	Unique	30.46	High	0	4.263e-05
FALSE	High	CKENGAFTVLVDNYVKEEEGTGVVHQAPYFGAEDYR	3xTMT6plex [N-Term; K2; K16]; 1xDeamidated [N]; 1xCarbamidomethyl [C1]	5.13688e-06	0	1	3	2	P41252	2	4780.38	High	Not Found	High	High	High	High	High	High	High	114.7		68.2	38.7	93.4	102.2	75.7	56.3	75.8	Unique	53.33	High	0	5.867e-06
FALSE	High	VVYGGGAAEISCALAVSQEADK	2xTMT6plex [N-Term; K22]; 1xCarbamidomethyl [C12]	5.81324e-08	0	1	5	1	P48643	0	2653.39	High	Not Found	High	High	High	High	High	High	High	172.5		75.2	39	23.9	72.3	20.8	22.1	50.4	Unique	89.05	High	0	7.141e-08
FALSE	High	GLDVDSLVIEHIQVNK	2xTMT6plex [N-Term; K16]	2.57246e-09	0	1	11	27	P18621-3	0	2237.29	High	High	High	High	High	High	High	High	High	2344.8	54.3	1257.3	1488.8	1738.8	1470.8	2296.5	1503.6	1244.5	Unique	71.24	High	0	3.418e-09
FALSE	High	GLDVDSLVIEHIQVNK	2xTMT6plex [N-Term; K16]; 1xDeamidated [Q/N]	6.2968e-06	0	1	11	2	P18621-3	0	2238.27	High	High	High	High	High	High	High	High	High	60.3	1.2	31.3	47.5	39.6	37.1	54.6	38.5	30.3	Unique	38.04	High	0	6.878e-06
FALSE	High	HTLVADPYEEAWNQMLLR	1xTMT6plex [N-Term]	1.78977e-08	0	1	1	1	P19634	0	2415.23	High	High	High	High	High	High	High	High	High	95.7	1.9	47.9	44.6	67.8	63.3	64.7	44.2	38.7	Unique	85.54	High	0	2.264e-08
FALSE	High	SCLLLQFTDKR	2xTMT6plex [N-Term; K10]; 1xCarbamidomethyl [C2]	4.2433e-05	0	2	6	1	Q8WUD1; P61019	1	1839.06	High	Not Found	High	High	High	High	High	High	High	57.1		27.1	33.7	56.3	41.4	68.4	43.8	37.1	NotUnique	40.36	High	0	4.425e-05
FALSE	High	DRPQEADGIDSVIVVDNVPQVGPDR	1xTMT6plex [N-Term]	2.37355e-11	0	1	3	2	P55884-2	0	2919.5	High	High	High	High	High	High	High	High	High	341.6	9	124.4	94.7	85.5	117.4	93.2	74.5	80.7	Unique	131.41	High	0	3.538e-11
FALSE	High	VVTNYNSAHDQNSNLLIEYFR	2xTMT6plex [N-Term; S/T]	2.94068e-06	0	1	2	4	P21980	0	2955.54	High	Not Found	High	High	High	High	High	High	High	180.3		190.5	118.6	124.3	286.8	106.8	104.3	132.9	Unique	56.78	High	0	4.019e-06
FALSE	High	VVTNYNSAHDQNSNLLIEYFR	1xTMT6plex [N-Term]; 1xDeamidated [N/Q]	1.46086e-06	0	1	2	6	P21980	0	2727.36	High	High	High	High	High	High	High	High	High	44.8	3.7	77.8	39.4	34.8	54.6	28.9	20.4	29.4	Unique	62.16	High	0	1.649e-06
FALSE	High	VVTNYNSAHDQNSNLLIEYFR	1xTMT6plex [N-Term]	7.92303e-09	0	1	2	2	P21980	0	2726.37	High	High	High	High	High	High	High	High	High	67.4	14.9	150.8	78.3	35.1	92.9	20	25.4	45.4	Unique	85	High	0	1.026e-08
FALSE	High	NGAPIIMSFPHFYQADER	2xTMT6plex [N-Term; S8]; 1xDeamidated [N1]	0.000125212	0	1	9	1	A0A1W2PRS1	0	2552.3	High	Not Found	High	High	High	High	High	High	High	46.1		8.1	19.2	59.3	21.1	51.3	30.3	12.9	Unique	38.15	High	0	0.0001278
FALSE	High	NGAPIIMSFPHFYQADER	2xTMT6plex [N-Term; S8]	0.000132994	0	1	9	1	A0A1W2PRS1	0	2551.32	High	Not Found	High	High	High	High	High	High	High	155.4		16.5	20.1	164	53	154.5	82.6	35.6	Unique	30.07	High	0	0.0001356
FALSE	High	NGAPIIMSFPHFYQADER	1xTMT6plex [N-Term]; 1xDeamidated [N1]	1.24559e-06	0	1	9	4	A0A1W2PRS1	0	2323.14	High	High	High	High	High	High	High	High	High	324.9	7.4	86.9	174.6	297.9	82.1	294.3	173.4	69.3	Unique	55.31	High	0	1.419e-06
FALSE	High	NGAPIIMSFPHFYQADER	1xTMT6plex [N-Term]	3.06347e-05	0	1	9	1	A0A1W2PRS1	0	2322.15	High	Not Found	High	High	High	High	High	High	High	95.3		15.2	21.4	54	15.2	65	42.4	22.6	Unique	39.48	High	0	3.222e-05
FALSE	High	TYEEIASLVAEQPK	2xTMT6plex [N-Term; K14]	1.00648e-05	0	1	1	1	Q9Y5X1	0	2036.13	High	Not Found	High	High	High	High	High	High	High	406.3		286.9	177.5	184.2	340.1	190.8	128.1	174.3	Unique	46.11	High	0	1.086e-05
FALSE	High	TVNCLLVGAIAIPHCVLK	2xTMT6plex [N-Term; K18]; 2xCarbamidomethyl [C4; C15]	3.32836e-07	0	1	1	1	Q5SY16	0	2436.42	High	Not Found	High	High	High	High	High	High	High	41.5		6.6	22	30.1	21.2	21	13.1	14.5	Unique	63.64	High	0	3.895e-07
FALSE	High	YINENLIVNTDELGRDCLINAAK	2xTMT6plex [N-Term; K23]; 1xCarbamidomethyl [C17]	1.14929e-05	0	2	4	1	P17987; F5H136	1	3106.66	High	Not Found	High	High	High	High	High	High	High	8.4		6.7	2	10.1	9.6	12.2	2.5	5.8	NotUnique	52.13	High	0	1.232e-05
FALSE	High	GEENTDYVNASFIDGYR	1xTMT6plex [N-Term]	2.17615e-06	0	1	2	1	P18433	0	2179.01	High	Not Found	Not Found	High	High	Not Found	High	High	Not Found	2.2			2	3.6		2.9	1.4		Unique	44.79	High	0	2.437e-06
FALSE	High	SSLNSSPWSGLMALGNSR	1xTMT6plex [N-Term]; 1xDeamidated [N]	2.25327e-08	0	1	1	2	Q8TCJ2	0	2094.05	High	High	High	High	High	High	High	High	High	98.7	2	39.5	82.5	146.1	50.8	197.8	101.8	41.8	Unique	104.93	High	0	2.839e-08
FALSE	High	SSLNSSPWSGLMALGNSR	1xTMT6plex [N-Term]	8.66011e-08	0	1	1	1	Q8TCJ2	0	2093.06	High	High	High	High	High	High	High	High	High	157	2.9	38.6	88.3	174.1	63.9	141.8	89.5	46.1	Unique	73.17	High	0	1.056e-07
FALSE	High	SLQLSAWESSIVDR	1xTMT6plex [N-Term]	1.29011e-07	0	2	3	1	Q3KQU3-4; Q3KQU3	0	1819.98	High	High	High	High	High	High	High	High	High	49.2	2.3	21.4	27.4	22.7	31.3	40.4	34	26.6	NotUnique	78.34	High	0	1.546e-07
FALSE	High	IMNTFSVVPSPK	2xTMT6plex [N-Term; K12]; 1xDeamidated [N3]	3.51043e-06	0	4	12	2	Q13509; P04350; P07437; P68371	0	1779.01	High	Not Found	High	High	High	High	High	High	High	531.4		241.5	229.5	233.2	346.6	225.3	159.5	176.5	NotUnique	67.57	High	0	3.877e-06
FALSE	High	LDAENAIVHMGGQWLGGR	1xTMT6plex [N-Term]	2.80493e-05	0	2	3	1	Q01085; Q01085-2	0	2153.11	High	High	High	High	High	High	High	High	High	38.7	1.9	18.2	40.6	40.3	34.5	45	37.2	22.7	NotUnique	60.64	High	0	2.941e-05
FALSE	High	GTVVYGEPITASLGTDGSHYWSK	3xTMT6plex [N-Term; K23; S]	4.91446e-06	0	1	3	3	A0A1C7CYX9	0	3112.66	High	Not Found	High	High	High	High	High	High	High	229.6		204.9	97.4	100.4	256.2	91.3	81	95.6	Unique	32.26	High	0.0001827	0.0007645
FALSE	High	SPGESALLDGWLQR	1xTMT6plex [N-Term]	5.47425e-05	0	1	1	1	Q96A46	0	1757.94	High	Not Found	High	High	High	High	High	High	High	9.2		6	2.6	8.8	7.2	10.3	6.4	3.3	Unique	23.7	High	0	5.674e-05
FALSE	High	LSFGLEDEPLETATK	2xTMT6plex [N-Term; K15]	1.74349e-07	0	1	2	1	O94905	0	2108.15	High	Not Found	High	High	High	High	High	High	High	174.9		28.6	55.2	50.5	25.7	41.9	28	25.3	Unique	72.54	High	0	2.085e-07
FALSE	High	SWHNVYCVINNQEMGFYK	3xTMT6plex [N-Term; S1; K18]; 1xCarbamidomethyl [C7]	4.1328e-05	0	1	2	2	Q01082	0	2976.51	High	High	High	High	High	High	High	High	High	399.9	1.5	195.8	159.5	204.4	258.7	158.5	118	195.2	Unique	34.68	High	0	4.321e-05
FALSE	High	SWHNVYCVINNQEMGFYK	2xTMT6plex [N-Term; K18]; 1xCarbamidomethyl [C7]	2.59535e-09	0	1	2	1	Q01082	0	2747.35	High	High	High	High	High	High	High	High	High	72.2	6.2	141.7	132.7	40.1	51.9	40.9	29.9	36.7	Unique	94.43	High	0	3.433e-09
FALSE	High	QSKPVTTPEEIAQVATISANGDKEIGNIISDAMK	4xTMT6plex [N-Term; K3; K23; K34]; 1xOxidation [M33]; 1xDeamidated [N20]	7.5158e-08	0	1	3	1	P10809	1	4489.45	High	Not Found	High	High	High	High	High	High	High	52.8		38	23.7	39.6	68.6	58.5	28.2	75.8	Unique	114.65	High	0	9.187e-08
FALSE	High	NAEIEPDDYFMSR	1xTMT6plex [N-Term]	6.52269e-05	0	1	3	1	Q9Y2C4	0	1815.84	High	Not Found	High	High	High	High	High	High	High	74		16.2	21.2	51.3	47.4	40.3	24.6	22.3	Unique	44.68	High	0	6.713e-05
FALSE	High	VPMSVVNFEKPK	3xTMT6plex [N-Term; K10; K12]	5.23929e-05	0	1	2	2	Q9BYD2	0	2062.23	High	Not Found	High	High	High	High	High	High	High	231.6		119.6	152.6	246.3	195.2	236	142.4	157.9	Unique	30.49	High	0	5.433e-05
FALSE	High	ISPAIDYTYDSDILK	2xTMT6plex [N-Term; K15]	0.000105329	0	1	3	1	Q9P2K8	0	2172.18	High	Not Found	High	High	High	High	High	High	High	55.3		33.3	23.2	27.4	31.5	27.1	14.2	20	Unique	43.45	High	0	0.0001071
FALSE	High	MLIEFYESPDPER	1xTMT6plex [N-Term]	6.70066e-07	0	1	2	1	Q9NUQ2	0	1854.91	High	High	High	High	High	High	High	High	High	52.4	1.8	22.6	27.2	31.8	34.9	34.8	22.5	35.5	Unique	77.22	High	0	7.75e-07
FALSE	High	TKLDLSSLAYSGK	3xTMT6plex [N-Term; K2; K13]	5.4171e-06	0	1	3	1	Q16595	1	2070.24	High	Not Found	High	High	High	High	High	High	High	289.5		120.6	105.7	241.9	233.5	184.5	125.2	162.2	Unique	65.59	High	0	5.934e-06
FALSE	High	KYNILGTNAIMDK	3xTMT6plex [N-Term; K1; K13]	2.54555e-05	0	1	8	1	Q9BUJ2	1	2168.27	High	Not Found	High	High	High	High	High	High	High	20.2		11.3	22	27.4	30	36.8	28.4	26.5	Unique	37.93	High	0	2.681e-05
FALSE	High	EAFVVEEWVK	2xTMT6plex [N-Term; K10]	0.000120964	0	1	3	1	P35606	0	1693.96	High	Not Found	High	High	High	High	High	High	High	132.2		91.3	37.9	53.1	93.1	50.6	35.3	46.9	Unique	63.57	High	0	0.0001231
FALSE	High	KEELLNAMVAK	3xTMT6plex [N-Term; K1; K11]	6.02841e-05	0	1	5	1	P57737-3	1	1933.18	High	Not Found	High	High	High	High	High	High	High	180.7		103.9	83.1	83.2	179.9	73.1	63.2	67.9	Unique	43.64	High	0	6.205e-05
FALSE	High	YNFPNPNPFVEDDMDKNEIASVAYR	2xTMT6plex [N-Term; K16]	3.47948e-06	0	1	3	1	O15371	1	3403.67	High	Not Found	High	High	High	High	High	High	High	141.4		62.9	40.8	73.4	69.8	71.4	47.8	55.3	Unique	55.61	High	0	3.853e-06
FALSE	High	GVTIPYRPKPSSSPVIFAGGQLTK	3xTMT6plex [N-Term; K9; K24]	6.76027e-07	0	1	2	1	F8VZX2	0	3187.88	High	High	High	High	High	High	High	High	High	78.2	0.2	41.1	182.1	261.3	99.8	239.2	228.6	119.3	Unique	21.54	High	0	7.772e-07
FALSE	High	GFAELQTDMTDLTK	2xTMT6plex [N-Term; K14]	4.22777e-06	0	1	2	1	Q9Y4D7	0	2028.07	High	High	High	High	High	High	High	High	High	147.4	1.3	47.4	74.4	111.2	37.5	120.8	79	25	Unique	48.18	High	0	4.664e-06
FALSE	High	WDASASEPEYMEEVR	1xTMT6plex [N-Term]	8.25738e-05	0	1	1	1	O95140	0	2027.92	High	High	High	High	High	High	High	High	High	125.8	12.3	43.4	50.7	54.1	66.1	63.2	31.2	59.8	Unique	27.77	High	0	8.472e-05
FALSE	High	NLPIYSEEIVEMYK	2xTMT6plex [N-Term; K14]	1.34803e-08	0	1	2	4	P35579	0	2186.18	High	Not Found	High	High	High	High	High	High	High	400.6		162.6	131.3	266.4	419.5	304.8	227.7	262.3	Unique	106.98	High	0	1.718e-08
FALSE	High	NLPIYSEEIVEMYK	2xTMT6plex [N-Term; K14]; 1xOxidation [M12]	5.37904e-05	0	1	2	5	P35579	0	2202.18	High	Not Found	High	High	High	High	High	High	High	539.2		331.8	242.6	344	614.5	400.4	284.7	361.5	Unique	59.08	High	0	9.535e-05
FALSE	High	NETGGGEGVEVLVNEPYEK	2xTMT6plex [N-Term; K19]	4.59266e-05	0	1	4	2	F5GWE5	0	2478.28	High	Not Found	High	High	High	High	High	High	High	300.5		79.6	51.5	54.7	177.7	38.7	31.6	53.6	Unique	44.07	High	2.047e-05	0.0001536
FALSE	High	EQWTKYEEENFYLEPYLK	3xTMT6plex [N-Term; K5; K18]	1.54015e-07	0	1	1	1	P14927	1	3096.62	High	Not Found	High	High	High	High	High	High	High	74.2		102.2	64.1	349.6	182.8	249.6	118.9	80.2	Unique	61.35	High	0	1.846e-07
FALSE	High	MQAHIQDLEEQLDEEEGAR	1xTMT6plex [N-Term]	1.05193e-08	0	1	5	2	P35580-3	0	2470.17	High	High	High	High	High	High	High	High	High	91	2.5	61.6	66.2	92.8	107.8	152.8	111	94.5	Unique	99.75	High	0	1.35e-08
FALSE	High	GVPYRPTDLFDELVAHEVAR	1xTMT6plex [N-Term]	3.95495e-05	0	1	3	1	O95248-4	0	2513.33	High	High	High	High	High	High	High	High	High	65.4	15.8	64.9	51.4	45	65.9	60.6	41.1	46.9	Unique	41.07	High	0	4.107e-05
FALSE	High	QDLLTAAPASEIAEGLNLHTIR	1xTMT6plex [N-Term]	3.11796e-05	0	1	1	1	P36405	0	2562.41	High	High	High	High	High	High	High	High	High	18.5	1.4	14	7.6	8.8	18.9	3.2	6.6	6	Unique	45.82	High	0	3.269e-05
FALSE	High	DVLHQNFESYKPEVQELICVADR	2xTMT6plex [N-Term; K11]; 1xCarbamidomethyl [C19]	1.69578e-05	0	1	2	1	Q8NBP0	0	3247.68	High	Not Found	High	High	High	High	High	High	High	49.4		13	24.8	26.7	9	19	15	6	Unique	50.5	High	0	1.809e-05
FALSE	High	VLLCGPVGPK	2xTMT6plex [N-Term; K10]; 1xCarbamidomethyl [C4]	0.000126296	0	1	5	2	Q9BRR6	0	1497.92	High	High	High	High	High	High	High	High	High	406.4	1.9	116.4	167.8	214.4	133	225	122.5	104.5	Unique	58.48	High	0	0.0001284
FALSE	High	WDASASEPEYMEDVR	1xTMT6plex [N-Term]	3.88595e-05	0	1	5	1	Q8IWA4	0	2013.91	High	Not Found	High	High	High	High	High	High	High	21.3		4.7	3.2	8.5	2.6	5.5	2.1	7.4	Unique	46.35	High	0	4.059e-05
FALSE	High	QPEYLDATGGTLHPYQMEGLNWLR	1xTMT6plex [N-Term]	1.12914e-05	0	1	4	1	Q14839-2	0	3018.5	High	Not Found	High	High	High	High	High	High	High	3.7		7.2	3.6	2.5	8.8	3.1	2.4	2.4	Unique	38.94	High	0	1.218e-05
FALSE	High	FEQEYLNDLMK	2xTMT6plex [N-Term; K11]	6.02841e-05	0	1	3	1	O60449	0	1887.99	High	High	High	High	High	High	High	High	High	212.2	1.2	45.1	89.8	128.9	59.2	137.2	72.1	37.7	Unique	42.32	High	0	6.21e-05
FALSE	High	ALCQITDSTMLQAIER	1xTMT6plex [N-Term]; 1xCarbamidomethyl [C3]	3.97342e-07	0	1	1	1	Q9Y678	0	2079.08	High	High	High	High	High	High	High	High	High	164.6	14	104.8	70.8	63.9	103.1	70.4	50.4	55.4	Unique	66.79	High	0	4.652e-07
FALSE	High	TDASSASSFLDSDELER	1xTMT6plex [N-Term]	4.41913e-06	0	1	7	1	Q14498	0	2058.97	High	Not Found	High	High	High	High	High	High	High	37.3		19.6	31.7	39	42.7	65.9	41.2	31.7	Unique	44.31	High	0	4.88e-06
FALSE	High	ILNHVLQHAEPGNAQSVLEAIDTYCEQK	2xTMT6plex [N-Term; K28]; 1xCarbamidomethyl [C25]	7.45207e-07	0	1	5	3	P21964	0	3635.89	High	Not Found	High	High	High	High	High	High	High	248.9		107.4	95	104.4	155.4	110.1	83.9	158.9	Unique	32.81	High	0	8.592e-06
FALSE	High	KGTDIMYTGTLDCWR	2xTMT6plex [N-Term; K1]; 1xCarbamidomethyl [C13]	8.73716e-08	0	1	1	3	P05141	1	2275.16	High	High	High	High	High	High	High	High	High	681.5	3.8	211.8	306.1	451.7	387	405.4	221.6	329.4	Unique	68.87	High	0	1.057e-07
FALSE	High	DRAEGALLAESPLGSSDA	1xTMT6plex [N-Term]	3.93695e-08	0	1	1	1	Q86T13	1	1988.01	High	High	High	High	High	High	High	High	High	149.8	1.6	6.7	62.8	129.2	19.8	152.5	64.8	9.2	Unique	96.98	High	0	4.862e-08
FALSE	High	QSKPVTTPEEIAQVATISANGDKEIGNIISDAMK	4xTMT6plex [N-Term; K3; K23; K34]; 2xDeamidated [Q/N]	5.27356e-08	0	1	3	12	P10809	1	4474.44	High	Not Found	High	High	High	High	High	High	High	33.4		24.9	14.1	23.3	50.4	30.2	24.8	48.6	Unique	122.71	High	0	6.479e-08
FALSE	High	QSKPVTTPEEIAQVATISANGDKEIGNIISDAMK	4xTMT6plex [N-Term; K3; K23; K34]; 1xDeamidated [N/Q]	1.66796e-07	0	1	3	8	P10809	1	4473.46	High	Not Found	High	High	High	High	High	High	High	119		94.7	57.9	108.6	173.8	124	87.5	157.9	Unique	135.58	High	0	1.986e-07
FALSE	High	QSKPVTTPEEIAQVATISANGDKEIGNIISDAMK	4xTMT6plex [N-Term; K3; K23; K34]	7.30785e-05	0	1	3	3	P10809	1	4472.47	High	High	High	High	High	High	High	High	High	283.9	1.2	179	132.7	252.2	388.5	315.7	203.9	373.5	Unique	63.02	High	0	7.496e-05
FALSE	High	KVQSLGVLFCQGEVTR	2xTMT6plex [N-Term; K1]; 1xCarbamidomethyl [C10]	5.81324e-08	0	1	3	1	Q96CU9	1	2279.29	High	Not Found	High	High	High	High	High	High	High	39.9		20.3	34.7	67.3	40.4	42.6	25.7	42.5	Unique	78.57	High	0	7.125e-08
FALSE	High	VGEATETALTCLVEK	2xTMT6plex [N-Term; K15]; 1xCarbamidomethyl [C11]	5.66968e-05	0	1	13	2	P16615	0	2079.14	High	Not Found	High	High	High	High	High	High	High	328.6		129.2	137	162.8	145.8	196	106.9	149.2	Unique	30.14	High	7.07e-05	0.0003803
FALSE	High	RTDEDAVLMDGMTESDTASVNENGLGK	2xTMT6plex [N-Term; K27]; 1xDeamidated [N]	1.07821e-13	0	1	3	2	P51114-2	1	3314.58	High	Not Found	High	High	High	High	High	High	High	52.8		41	38.2	41.3	64.5	49.2	36.9	41	Unique	148.14	High	0	1.855e-13
FALSE	High	RTDEDAVLMDGMTESDTASVNENGLGK	2xTMT6plex [N-Term; K27]	2.26899e-13	0	1	3	1	P51114-2	1	3313.59	High	Not Found	High	High	High	High	High	High	High	10.1		9.2	10	9.1	12.8	12.5	8.7	12.4	Unique	148.31	High	0	3.82e-13
FALSE	High	GAFEAMAHVVSLVHR	1xTMT6plex [N-Term]	6.0242e-06	0	1	4	1	Q96HP0	0	1853.01	High	High	High	High	High	High	High	High	High	20.5	31.5	38.4	33.6	11.9	17.2	13.4	10.6	15.2	Unique	45	High	0	6.592e-06
FALSE	High	EVTPILAQTQSSGPQTSTTPQVLSPTITSPPNALPR	1xTMT6plex [N-Term]	2.27467e-06	0	1	3	1	P30260-2	0	3944.12	High	Not Found	High	High	High	High	High	High	High	9.7		2.1	3.3	5.9	6	7.7	5.6	1.8	Unique	86.73	High	0	2.546e-06
FALSE	High	DMTAQFNNLGVLHVTK	3xTMT6plex [N-Term; T15; K16]	6.69617e-05	0	1	3	1	Q00653	0	2475.4	High	Not Found	High	High	High	High	High	High	High	41.3		23.8	10.8	22.7	68	28.1	20.9	31.1	Unique	25.24	High	0	6.911e-05
FALSE	High	EFGFQNNGFSVYINR	1xTMT6plex [N-Term]; 1xDeamidated [N/Q]	3.09059e-05	0	1	4	3	Q8TAT6-2	0	2021.99	High	High	High	High	High	High	High	High	High	45.8	1.8	30.2	24.2	34.5	42.9	36.5	16	26	Unique	46.07	High	0	3.239e-05
FALSE	High	KAYLPQELLGK	3xTMT6plex [N-Term; K1; K11]	3.76811e-06	0	1	7	1	P51398	1	1947.22	High	Not Found	High	High	High	High	High	High	High	250		124.2	174.4	291.3	227.3	266.9	158	186.6	Unique	47.51	High	0	4.151e-06
FALSE	High	LQQSLAGGPALGLSVSSKPK	3xTMT6plex [N-Term; K18; K20]	2.06303e-07	0	1	3	1	Q8TED9	0	2625.59	High	Not Found	High	High	High	High	High	High	High	39.8		22.3	17.1	30.9	39.7	26.4	20.9	39.6	Unique	79.59	High	0	2.445e-07
FALSE	High	RVIISAPSADAPMFVMGVNHEK	3xTMT6plex [N-Term; S8; K22]	1.32525e-06	0	1	3	1	P04406	1	3056.7	High	Not Found	High	High	High	High	High	High	High	62.5		31.1	87.1	195.2	175	258	212.5	173.2	Unique	48.53	High	0	1.502e-06
FALSE	High	RVIISAPSADAPMFVMGVNHEK	2xTMT6plex [N-Term; K22]; 1xOxidation [M]	6.07862e-07	0	1	3	4	P04406	1	2843.53	High	High	High	High	High	High	High	High	High	32.2		38.1	48.6	44.5	55.8	75.2	42.6	48.5	Unique	56.34	High	0	7.034e-07
FALSE	High	RVIISAPSADAPMFVMGVNHEK	2xTMT6plex [N-Term; K22]; 1xDeamidated [N19]	1.39611e-09	0	1	3	1	P04406	1	2828.52	High	Not Found	High	High	High	High	High	High	High	47.2		25	60.1	61.9	54.1	75.7	54.9	50.9	Unique	91.61	High	0	1.884e-09
FALSE	High	RVIISAPSADAPMFVMGVNHEK	2xTMT6plex [N-Term; K22]	2.61744e-10	0	1	3	4	P04406	1	2827.54	High	High	High	High	High	High	High	High	High	83.9	1.1	76.1	169.4	218.8	190.5	296.7	214.3	217	Unique	90.09	High	0	2.793e-09
FALSE	High	GEGYAKPNEGAIVEVALEGYYK	3xTMT6plex [N-Term; K6; K22]; 1xDeamidated [N8]	2.5973e-07	0	1	1	1	Q02790	0	3045.64	High	Not Found	High	High	High	High	High	High	High										NoQuanValues	62.97	High	0	3.068e-07
FALSE	High	GQFHEYQESTIGAAFLTQSVCLDDTTVK	2xTMT6plex [N-Term; K28]; 1xCarbamidomethyl [C21]	4.0447e-06	0	1	4	1	P61020	0	3603.8	High	Not Found	High	High	High	High	High	High	High	23.4		17.5	13.9	9	8.2	7.1	2.8	8.9	Unique	57.63	High	0	4.472e-06
FALSE	High	KPFPDFVYK	3xTMT6plex [N-Term; K1; K9]	0.000101738	0	1	3	2	A0A1C7CYX9	0	1828.1	High	Not Found	High	High	High	High	High	High	High	360		385.3	168.7	212.9	457.1	257.2	171	201.4	Unique	45.79	High	0	0.0001037
FALSE	High	SISVIDSPGILSGEK	3xTMT6plex [N-Term; K15; S]	6.46624e-06	0	1	1	2	Q9H223	0	2189.3	High	High	High	High	High	High	High	High	High	192.2	1.5	31.6	30.9	173.9	194	217	181.4	155	Unique	47.01	High	0	7.17e-06
FALSE	High	ILEVVNQIQDEER	1xTMT6plex [N-Term]	7.51614e-06	0	1	1	1	O94919	0	1813.99	High	High	High	High	High	High	High	High	High	127.1	6.3	50.4	56.1	69	66.9	91.8	56.2	44.6	Unique	38.89	High	0	8.181e-06
FALSE	High	NLAYDTLPVLIHGNGPTK	2xTMT6plex [N-Term; K18]; 1xDeamidated [N14]	6.46517e-08	0	1	2	2	Q02809-2	0	2382.34	High	Not Found	High	High	High	High	High	High	High	785.3		110.4	194.9	441	128.5	399.8	243	69.5	Unique	53.3	High	0	5.898e-07
FALSE	High	NLAYDTLPVLIHGNGPTK	2xTMT6plex [N-Term; K18]	8.32965e-05	0	1	2	1	Q02809-2	0	2381.36	High	High	High	High	High	High	High	High	High	246.5	1.1	37.8	53	145.3	43.8	159.3	75	25.4	Unique	39.23	High	0	8.526e-05
FALSE	High	DQQPQMELPLQGCNITYIPK	2xTMT6plex [N-Term; K20]; 1xCarbamidomethyl [C13]	4.75694e-05	0	1	2	1	Q8N556-2	0	2831.48	High	Not Found	High	High	High	High	High	High	High	85.1		37.7	48.8	41.1	45.1	48.8	37.6	29.5	Unique	52.43	High	0	4.918e-05
FALSE	High	NAGNEQDLGIQYK	2xTMT6plex [N-Term; K13]	3.03659e-05	0	1	5	2	P35221	0	1908.02	High	High	High	High	High	High	High	High	High	491.1	1.4	59.4	107.6	269.2	108.2	314.4	190.9	72	Unique	42.6	High	0	3.194e-05
FALSE	High	VDMTFEEEAQLLQLK	2xTMT6plex [N-Term; K15]	2.54555e-05	0	1	3	2	Q14318-2	0	2252.22	High	Not Found	High	High	High	High	High	High	High	147.7		117.2	89.4	100	158.5	85.9	55.8	120.8	Unique	44.85	High	0	7.587e-05
FALSE	High	SEMTPEELQKREEEEFNTGPLSVLTQSVK	3xTMT6plex [N-Term; K10; K29]; 1xDeamidated [Q9]	8.77651e-05	0	1	2	1	P62316	2	4024.1	High	Not Found	High	High	High	High	High	High	High	16.1		11.8	9.4	47.1	33.8	46.9	22.4	11.8	Unique	29.04	High	0	9.009e-05
FALSE	High	ITSGPFEPDLYKSEMEVQDAELK	3xTMT6plex [N-Term; K12; K23]	2.76394e-06	0	1	2	1	Q9UQ80	1	3313.75	High	High	High	High	High	High	High	High	High	43.7	1.6	75	69.7	225.7	138.1	304.9	175.5	87.8	Unique	42.79	High	0	3.067e-06
FALSE	High	DASVPLIDVTNLPTPR	1xTMT6plex [N-Term]	7.11879e-05	0	1	2	1	Q96A65	0	1937.09	High	High	High	High	High	High	High	High	High	109	6.7	89.2	51.6	69.5	104.3	67.3	42.9	53	Unique	61.67	High	0	7.332e-05
FALSE	High	AADCEVEQWDSDEPIPAK	2xTMT6plex [N-Term; K18]; 1xCarbamidomethyl [C4]	8.43585e-07	0	1	2	1	Q9UBQ7	0	2518.22	High	Not Found	High	High	High	High	High	High	High	342.8		159.7	123.6	141.8	198.3	106.3	81.7	141.3	Unique	60.19	High	0	9.668e-07
FALSE	High	SLDLDGIIAEVK	2xTMT6plex [N-Term; K12]	2.35669e-06	0	1	2	3	P08729	0	1731.03	High	Not Found	High	High	High	High	High	High	High	474.2		439.8	322.8	404	613.1	400.7	318.9	299.6	Unique	80.19	High	0	2.646e-06
FALSE	High	GVYPDLLATSGDYLR	1xTMT6plex [N-Term]	2.31532e-06	0	1	1	1	P61962	0	1869	High	High	High	High	High	High	High	High	High	16.9	5.7	10.2	12.3	15.8	20	20.1	7.2	10.5	Unique	73.26	High	0	2.585e-06
FALSE	High	YMTISDEWDIPEK	2xTMT6plex [N-Term; K13]	1.14001e-06	0	1	3	1	P55884-2	0	2085.06	High	Not Found	High	High	High	High	High	High	High	196.7		42.1	43	18.2	38.4	31.6	30.3	40.9	Unique	74.6	High	0	1.296e-06
FALSE	High	GEGYAKPNEGAIVEVALEGYYK	3xTMT6plex [N-Term; K6; K22]	3.53862e-09	0	1	1	1	Q02790	0	3044.65	High	Not Found	High	High	High	High	High	High	High	82.6		106.9	44.1	35.3	129.7	42.2	33.6	64.9	Unique	102.11	High	0	4.659e-09
FALSE	High	VAAAESMPLLLECAR	1xTMT6plex [N-Term]; 1xCarbamidomethyl [C13]	0.000110948	0	1	4	1	O00410-3	0	1859.99	High	High	High	High	High	High	High	High	High	62.8	2.1	21.6	24.8	24	45.5	29.7	16.9	36	Unique	37.54	High	0	0.0001129
FALSE	High	EGSVVVDLAAEAGGNFETTKPGELYIHK	3xTMT6plex [N-Term; K20; K28]	8.65934e-06	0	1	2	1	Q13423	0	3618.96	High	Not Found	High	High	High	High	High	High	High	37.3		26.8	47.7	70.4	35.4	59.6	54	31.3	Unique	36.06	High	0	9.358e-06
FALSE	High	SSPEPVALTESETEYVIR	1xTMT6plex [N-Term]	3.73489e-06	0	1	1	1	Q9Y678	0	2236.15	High	High	High	High	High	High	High	High	High	82.5	3	40.7	28.6	28.5	53.5	41.1	20.5	31.9	Unique	62.62	High	0	4.135e-06
FALSE	High	AENGKLVINGNPITIFQER	2xTMT6plex [N-Term; K5]	1.22334e-07	0	1	2	1	P04406	1	2571.47	High	Not Found	High	High	High	High	High	High	High	25.4		46.6	59.5	75.2	87.8	150.5	57.1	67.6	Unique	57.6	High	0	1.474e-07
FALSE	High	AENGKLVINGNPITIFQER	2xTMT6plex [N-Term; K5]; 1xDeamidated [N]	3.0722e-08	0	1	2	2	P04406	1	2572.45	High	High	High	High	High	High	High	High	High	45.5	1.2	87.4	133.1	200.9	197.6	379.3	158.5	161	Unique	63.38	High	0	3.847e-08
FALSE	High	AENGKLVINGNPITIFQER	2xTMT6plex [N-Term; K5]; 2xDeamidated [N3; N9]	8.81394e-06	0	1	2	1	P04406	1	2573.43	High	Not Found	High	High	High	High	High	High	High	13.2		46.7	61.4	111.2	93.7	169.2	105.9	75.1	Unique	57.17	High	0	9.524e-06
FALSE	High	YDYVEVFDGENENGHFR	1xTMT6plex [N-Term]; 1xDeamidated [N]	1.2346e-06	0	2	7	2	E9PEP6; O14786	0	2320.04	High	High	High	High	High	High	High	High	High	354.4	4.2	47.9	122.7	131.3	54.1	133.7	102.3	45.7	NotUnique	75.21	High	0	1.398e-06
FALSE	High	YDYVEVFDGENENGHFR	1xTMT6plex [N-Term]	3.10115e-06	0	2	7	1	E9PEP6; O14786	0	2319.05	High	High	High	High	High	High	High	High	High	311.6	2.9	43.2	84.6	117.5	46.2	136.5	85.2	28.6	NotUnique	58.2	High	0	3.445e-06
FALSE	High	STIAAPTSSALSSQPIFTTAIDDR	1xTMT6plex [N-Term]	7.71527e-09	0	2	5	1	A0A0A0MSA7; A0A0U1RQK7	0	2679.4	High	High	High	High	High	High	High	High	High	59	1.6	19.3	26.4	43.4	27	51.9	31	17.9	NotUnique	62.5	High	0	9.939e-09
FALSE	High	KREDAITQQNTIQNEAVNLLDPGSSYLLQEPPR	2xTMT6plex [N-Term; K1]; 1xDeamidated [Q/N]	1.79091e-06	0	1	2	3	Q96IZ0	2	4197.22	High	Not Found	High	High	High	High	High	High	High	1.4		8.1	7.6	6	8.5	5.9	5.8	7.6	Unique	14.54	High	0	2.134e-06
FALSE	High	KSEIEYYAMLAK	3xTMT6plex [N-Term; K1; K12]	3.86954e-06	0	1	2	3	P62888	1	2133.22	High	High	High	High	High	High	High	High	High	919.8	2.4	310.1	571.8	1027.4	565.6	1164.5	909.4	584.4	Unique	66.82	High	0	4.269e-06
FALSE	High	VLSTDVDVILR	1xTMT6plex [N-Term]	3.31635e-05	0	1	2	1	Q9NUJ1	0	1458.87	High	High	High	High	High	High	High	High	High	79.8	2	43	43.6	62.7	60.9	60.7	40	56.1	Unique	74.45	High	0	3.472e-05
FALSE	High	WSFVESLEPSHVVQVR	2xTMT6plex [N-Term; S6]	0.000144924	0	1	2	1	A0A087X2D5	0	2357.3	High	Not Found	High	High	High	High	High	High	High	235.4		65	82.6	229.1	196.3	201.6	127	173.1	Unique	16.65	High	0	0.0001473
FALSE	High	WSFVESLEPSHVVQVR	1xTMT6plex [N-Term]	6.2968e-06	0	1	2	3	A0A087X2D5	0	2128.14	High	High	High	High	High	High	High	High	High	199	8.1	84.4	92.4	117.6	123	115.8	77.3	93.1	Unique	38.33	High	0	6.893e-06
FALSE	High	MMVGVNISDEQLGSIADR	1xTMT6plex [N-Term]	3.60455e-07	0	1	1	1	Q99653	0	2164.09	High	High	High	High	High	High	High	High	High	67	1.5	42.9	38.2	34.5	43.7	43.8	30.8	40.3	Unique	65.11	High	0	4.229e-07
FALSE	High	KEQDDLLVLLADQDQK	3xTMT6plex [N-Term; K1; K16]	1.08029e-05	0	1	2	1	O60763	1	2558.46	High	High	High	High	High	High	High	High	High	99.9	1.9	39.9	53.7	33.9	67.7	40.4	22.4	40.9	Unique	56.23	High	0	1.16e-05
FALSE	High	LEIEPEWAYGK	2xTMT6plex [N-Term; K11]	1.74133e-05	0	1	1	2	Q00688	0	1792.99	High	Not Found	High	High	High	High	High	High	High	362		138.6	181	160.1	153.8	164.2	123.2	140	Unique	64.23	High	0	1.851e-05
FALSE	High	AFDDVPVVQIYSSR	1xTMT6plex [N-Term]	1.00707e-06	0	2	9	1	Q7Z460; Q7Z460-4	0	1824.97	High	High	High	High	High	High	High	High	High	21.4	1.6	11.5	14.1	15.6	13	10.8	7.3	9.8	NotUnique	75.5	High	0	1.149e-06
FALSE	High	QDSIYYEHFYNELQPWK	2xTMT6plex [N-Term; K17]	1.24521e-07	0	1	1	1	Q6UW63	0	2718.36	High	Not Found	High	High	High	High	High	High	High	145.5		29	59.1	66.7	39.5	81.2	54.7	32.4	Unique	55.1	High	0	1.503e-07
FALSE	High	REFQLDLDEIENDNGTVR	1xTMT6plex [N-Term]; 1xDeamidated [N14]	1.61034e-06	0	1	5	1	Q14008	1	2393.18	High	High	High	High	High	High	High	High	High	59.1	2.1	22.1	29.2	41.4	33.5	45.1	32.3	25.1	Unique	53.05	High	0	1.81e-06
FALSE	High	REFQLDLDEIENDNGTVR	1xTMT6plex [N-Term]	1.805e-09	0	1	5	1	Q14008	1	2392.19	High	High	High	High	High	High	High	High	High	71.7	2.7	32	34.7	48.8	45.9	66.1	42.3	30.7	Unique	87.26	High	0	2.423e-09
FALSE	High	SYQLANISSPSLVVECGGQTVQSCVIR	1xTMT6plex [N-Term]; 2xCarbamidomethyl [C16; C24]	3.12711e-08	0	1	15	1	O75923-8	0	3181.62	High	Not Found	High	High	High	High	High	High	High	35.9		12.4	39.7	51.7	30.5	34.2	27.4	26	Unique	76.43	High	0	3.892e-08
FALSE	High	IYHPNINSNGSICLDILR	1xTMT6plex [N-Term]; 1xCarbamidomethyl [C13]	1.31268e-08	0	3	16	1	P51668; P61077-2; A0A0A0MQU3	0	2328.23	High	High	High	High	High	High	High	High	High	83.5	7.6	92.6	48.2	33.3	45.1	49.6	23.8	32.3	NotUnique	84.95	High	0	1.669e-08
FALSE	High	FAAEHTIFASNTSSLQITSIANATTR	1xTMT6plex [N-Term]	5.65435e-11	0	1	10	1	E9PF18	0	2981.55	High	Not Found	High	High	High	High	High	High	High	10.9		8.4	11.4	8.8	7	9.3	2.5	8.2	Unique	127.17	High	0	8.286e-11
FALSE	High	IYHPNINSNGSICLDILR	1xTMT6plex [N-Term]; 1xDeamidated [N9]; 1xCarbamidomethyl [C13]	8.65934e-06	0	3	16	2	P51668; P61077-2; A0A0A0MQU3	0	2329.22	High	High	High	High	High	High	High	High	High	184.9	11.4	152.4	101.6	72.3	107.8	88	60.1	55.9	NotUnique	51.61	High	0	9.375e-06
FALSE	High	LEEEQIILEDQNCK	2xTMT6plex [N-Term; K14]; 1xCarbamidomethyl [C13]	4.87123e-07	0	1	1	2	P35579	0	2219.16	High	Not Found	High	High	High	High	High	High	High	227.7		200.8	155.8	146.9	204.9	166.3	96.9	131.7	Unique	69.27	High	0	5.688e-07
FALSE	High	KISENSYSLDDLEIGPGQLSSSTFDSEK	3xTMT6plex [N-Term; K1; K28]	1.99048e-08	0	2	6	1	Q9UHB6-4; Q9UHB6	1	3733.93	High	Not Found	High	High	High	High	High	High	High	274.8		165.1	164.7	142	219.8	114.4	90.5	127.6	NotUnique	71.93	High	0	2.509e-08
FALSE	High	VFEEDALSWEDKLNR	2xTMT6plex [N-Term; K12]	1.08029e-05	0	1	1	1	Q14204	1	2309.22	High	Not Found	High	High	High	High	High	High	High	76.5		66	49.4	78.5	74.7	48.8	39.9	50.6	Unique	34.78	High	0	1.158e-05
FALSE	High	ALNALNNLSVNVENQIK	2xTMT6plex [N-Term; K17]	5.96979e-08	0	2	13	1	Q8N2F6; Q8N2F6-2	0	2312.33	High	Not Found	Not Found	High	High	High	High	Not Found	Not Found	2.6			1.7	1.8	1.8	1.4			NotUnique	95.4	High	0	7.3e-08
FALSE	High	GWVNTLVGGQK	2xTMT6plex [N-Term; K11]	6.08145e-05	0	1	1	1	P14735	0	1616.95	High	Not Found	High	High	High	High	High	High	High	63.7		53.7	37.5	42.2	78.9	40.2	29.1	42.5	Unique	67.81	High	0	6.294e-05
FALSE	High	GVVIGTGENSEFGEVFK	2xTMT6plex [N-Term; K17]	1.03307e-09	0	1	11	1	P98194-7	0	2227.2	High	Not Found	High	High	High	High	High	High	High	36.4		23.6	24.6	37.1	25.9	39.7	24.2	21	Unique	79.39	High	0	1.405e-09
FALSE	High	YDRLEIWDGFPDVGPHIGR	1xTMT6plex [N-Term]	2.62092e-06	0	2	9	1	E9PEP6; O14786	1	2471.27	High	High	High	High	High	High	High	High	High	137.7	0.8	29	70.8	172.8	42.8	168	108.7	32	NotUnique	52.43	High	0	2.92e-06
FALSE	High	DYEVSDSAPHLEGLAEFQENVR	1xTMT6plex [N-Term]	2.62092e-06	0	1	1	2	Q9HBM1	0	2734.32	High	Not Found	High	High	High	High	High	High	High	26.2		12.7	12.8	20.3	7.3	22.4	12.8	11.8	Unique	47.16	High	0	2.923e-06
FALSE	High	YQAMLSVDDCFGMGR	1xTMT6plex [N-Term]; 1xCarbamidomethyl [C10]	1.05267e-06	0	1	5	1	O15460-2	0	1978.9	High	Not Found	High	High	High	High	High	High	High	21.5		0.5	6	15.1	1.7	12.8	9.1	1.6	Unique	73.36	High	0	1.196e-06
FALSE	High	YALVWGTSTK	2xTMT6plex [N-Term; K10]	0.000109991	0	1	1	1	P55039	0	1583.92	High	Not Found	High	High	High	High	High	High	High	196.3		74.5	94.3	76.6	143.5	80	60.4	79.3	Unique	52.36	High	0	0.000112
FALSE	High	KITGIITTGSTMVEHNYYVSAYR	2xTMT6plex [N-Term; K1]	1.08029e-05	0	1	2	1	Q96PD2-2	1	3062.64	High	Not Found	High	High	High	High	High	High	High	16		13.7	11.2	5.9	2.5	10.3	3.7	2.3	Unique	43.4	High	0	1.16e-05
FALSE	High	KKPPVATEGESALNFNLFEK	4xTMT6plex [N-Term; K1; K2; K20]	3.35797e-07	0	1	2	1	A0A087WYN9	1	3135.82	High	Not Found	High	High	High	High	High	High	High	3.8		2.3	2.7	5.5	3.1	6.8	2.2	3.6	Unique	62.89	High	0	3.955e-07
FALSE	High	DFQEYVEPGEDFPASPQR	1xTMT6plex [N-Term]	8.43302e-08	0	1	3	1	Q9Y6G9	0	2340.1	High	High	High	High	High	High	High	High	High	63.2	2.6	36.8	19.9	30.2	43.4	31	22	28	Unique	73.84	High	0	1.027e-07
FALSE	High	RGPFELEAFYSDPQGVPYPEAK	2xTMT6plex [N-Term; K22]	6.34924e-09	0	1	5	1	Q92598	1	2955.53	High	Not Found	High	High	High	High	High	High	High	157.8		313.4	72	81.9	391.1	83.3	106.4	221.6	Unique	82.74	High	0	8.226e-09
FALSE	High	VEDMAELTCLNEASVLHNLKER	2xTMT6plex [N-Term; K20]; 1xCarbamidomethyl [C9]	2.02681e-07	0	1	2	2	P35579	1	3029.58	High	Not Found	High	High	High	High	High	High	High	49.5		260	123.3	182.6	189.4	239.2	72.7	80.4	Unique	50.95	High	0	2.411e-07
FALSE	High	GKDLIGVQNLLK	3xTMT6plex [N-Term; K2; K12]	1.48523e-05	0	2	5	2	Q13813-3; A0A0D9SGF6	1	1985.27	High	Not Found	High	High	High	High	High	High	High	390.6		351.1	247	290.7	412.7	286.6	207	263.9	NotUnique	38.11	High	0	1.587e-05
FALSE	High	YKVEGFPTIYFAPSGDKK	4xTMT6plex [N-Term; K2; K17; K18]	1.33573e-05	0	1	1	2	P13667	2	2963.71	High	Not Found	High	High	High	High	High	High	High	115.5		97.3	127.1	264.4	140.4	268	150.5	102.2	Unique	54.75	High	0	1.43e-05
FALSE	High	VAILVDDMADTCGTICHAADK	2xTMT6plex [N-Term; K21]; 2xCarbamidomethyl [C12; C16]	1.19036e-09	0	2	6	1	P60891; P11908-2	0	2734.36	High	Not Found	High	High	High	High	High	High	High	109.9		87	68.1	52.4	106.2	53.9	41.3	53	NotUnique	106.66	High	0	1.615e-09
FALSE	High	CEYPAACNALETLLIHR	1xTMT6plex [N-Term]; 2xCarbamidomethyl [C1; C7]	2.50102e-05	0	2	2	1	P54886; P54886-2	0	2260.14	High	High	High	High	High	High	High	High	High	253.6	2	47.2	80.6	153.8	112.9	116.9	95.1	136.8	NotUnique	65.48	High	0	2.628e-05
FALSE	High	QLQQAVTGISNAAQATASDDASQHQGGGGGELAYALNNFDK	2xTMT6plex [N-Term; K41]	9.70223e-12	0	1	4	1	P35221	0	4562.25	High	Not Found	High	High	High	High	High	High	High	14.4		0.5	3.8	9.4	1.8	12.2	3.8	1.4	Unique	118.65	High	0	1.486e-11
FALSE	High	QLQQAVTGISNAAQATASDDASQHQGGGGGELAYALNNFDK	2xTMT6plex [N-Term; K41]; 1xDeamidated [Q]	1.5653e-11	0	1	4	4	P35221	0	4563.24	High	Not Found	High	High	High	High	High	High	High	44.5		9	17.5	27.5	11	38.6	17.6	12.7	Unique	134.61	High	0	2.362e-11
FALSE	High	TTVETEDSSVENPEQDLFVEQK	2xTMT6plex [N-Term; K22]	0.000146173	0	2	4	1	Q9UPN3; Q9UPN3-5	0	2982.48	High	Not Found	High	High	High	High	High	High	High	92.8		62.1	41.3	61.1	75.2	77.7	52.7	51.4	NotUnique	32.43	High	0	0.0001483
FALSE	High	QLQQAVTGISNAAQATASDDASQHQGGGGGELAYALNNFDK	3xTMT6plex [N-Term; K41; S/T]	3.18417e-07	0	1	4	2	P35221	0	4791.42	High	Not Found	High	High	High	Not Found	High	High	High	14.5		0.8	7.9	5.5		9.7	1.9	1.4	Unique	71.65	High	0	4.347e-07
FALSE	High	QLQQAVTGISNAAQATASDDASQHQGGGGGELAYALNNFDK	3xTMT6plex [N-Term; S18; K41]; 1xDeamidated [N/Q]	1.83796e-08	0	1	4	4	P35221	0	4792.4	High	Not Found	High	High	High	High	High	High	High	17.9		0.9	3	15.9	2.7	18.9	10.8	2.4	Unique	104.17	High	0	2.325e-08
FALSE	High	HTIIISWGGVNVPK	2xTMT6plex [N-Term; K14]	7.76839e-05	0	1	2	1	Q14315	0	1979.18	High	Not Found	High	High	High	High	High	High	High	137		318.8	34.4	107.5	165	76.2	41.3	60.4	Unique	32.69	High	0	7.95e-05
FALSE	High	HNQLPLVIEFTEQTAPK	2xTMT6plex [N-Term; K17]	7.85618e-06	0	2	6	2	H7BZ94; P07237	0	2423.37	High	High	High	High	High	High	High	High	High	314.2	1	96.6	107.8	254.4	141.2	223	138	110.8	NotUnique	46.35	High	0	8.491e-06
FALSE	High	HNQLPLVIEFTEQTAPK	3xTMT6plex [N-Term; T14; K17]	3.93838e-07	0	2	6	1	H7BZ94; P07237	0	2652.53	High	Not Found	High	High	High	High	High	High	High	54.4		16.8	9.6	48.6	32.1	34.8	20.8	16.8	NotUnique	39.61	High	0	4.592e-07
FALSE	High	WMEEQAQSLIDK	2xTMT6plex [N-Term; K12]	0.000125212	0	1	2	1	A0A0A0MRR7	0	1936.03	High	Not Found	High	High	High	High	High	High	High	245.5		112.6	163.9	172.6	208	252.1	128.4	115.9	Unique	26.97	High	0	0.0001272
FALSE	High	VEAQVYILSK	2xTMT6plex [N-Term; K10]	2.98352e-05	0	1	1	2	P49411	0	1607.98	High	Not Found	High	High	High	High	High	High	High	291.3		140.1	153.8	258.2	231	224.5	144.6	200.2	Unique	85.7	High	0	3.12e-05
FALSE	High	RYPLSGMGLPTFK	2xTMT6plex [N-Term; K13]	1.62248e-05	0	1	2	1	O00116	1	1925.11	High	Not Found	High	High	High	High	High	High	High	247.1		88.4	127.9	178.5	133.6	211.8	126.1	92.2	Unique	39.03	High	0	1.729e-05
FALSE	High	EGEGEGLQSLEIGIAR	1xTMT6plex [N-Term]	1.652e-09	0	1	2	2	Q8IVF2	0	1887	High	Not Found	High	High	High	High	High	High	High	35		17.9	13.2	19.4	18.3	9.2	6.1	16.2	Unique	129.49	High	0	2.223e-09
FALSE	High	KLNPFGNTFLNR	2xTMT6plex [N-Term; K1]; 1xDeamidated [N7]	4.434e-05	0	1	1	1	Q9NZN4	1	1880.08	High	Not Found	High	High	High	High	High	High	High	55.5		63.3	42.2	39.6	74.1	52.9	43.3	58.5	Unique	46.68	High	0	4.621e-05
FALSE	High	KLNPFGNTFLNR	2xTMT6plex [N-Term; K1]	3.57315e-06	0	1	1	2	Q9NZN4	1	1879.1	High	Not Found	High	High	High	High	High	High	High	152.5		184.1	131.4	158.2	237.8	192.1	140.5	168.8	Unique	48.87	High	0	3.954e-06
FALSE	High	LIPVITSNCTSK	2xTMT6plex [N-Term; K12]; 1xCarbamidomethyl [C9]	8.4325e-06	0	2	7	1	Q7Z460; Q7Z460-4	0	1791.05	High	Not Found	High	High	High	High	High	High	High	13.8		8.2	12.7	9.7	15.1	10.1	6.5	8.7	NotUnique	48.33	High	0	9.099e-06
FALSE	High	LLQLGQGDELCGQEEAFR	1xTMT6plex [N-Term]; 1xCarbamidomethyl [C11]	1.75834e-08	0	1	2	1	P29474	0	2292.15	High	Not Found	High	High	High	High	High	High	High	42.2		31.2	20.8	21.5	34.8	20.3	18.1	29.7	Unique	90.15	High	0	2.222e-08
FALSE	High	LEIYQEDQIHFMCPLAR	1xTMT6plex [N-Term]; 1xCarbamidomethyl [C13]	4.09661e-05	0	1	4	1	Q9Y6I9	0	2392.2	High	Not Found	High	High	High	High	High	High	High	10.5		5.8	10.8	15.3	11.5	8.8	7.4	11.6	Unique	31.32	High	0	4.266e-05
FALSE	High	EAGENWQENPETYEDSFYK	2xTMT6plex [N-Term; K19]	5.76401e-07	0	2	6	1	P54289-4; P54289	0	2794.29	High	Not Found	High	High	High	High	High	High	High	174.4		40.8	58.8	55.6	32.7	53.5	30.3	15.5	NotUnique	61.82	High	0	6.662e-07
FALSE	High	GANLEEVNDEGYTPLMEAAR	1xTMT6plex [N-Term]	3.70026e-08	0	2	7	1	Q8IWZ3-6; E9PDP5	0	2408.16	High	High	High	High	High	High	High	High	High	51.6	12	29.4	28.9	38.3	38.7	50.7	38.6	36.7	NotUnique	57.04	High	0	4.604e-08
FALSE	High	DFTATDLSEFAAK	2xTMT6plex [N-Term; K13]	2.90564e-05	0	1	2	1	P42765	0	1873.99	High	Not Found	High	High	High	High	High	High	High	554.2		335.9	276.5	451	492	300	188.5	324.4	Unique	43.72	High	0	3.055e-05
[truncated: 77,349 more rows]

## Sheet: Total proteins
Uniprot ID	Description	DMSO 1	MYC 1	DMSO 2	MYC 2	DMSO 3	MYC3	log2_FC	adj.P.Val
[truncated: 6,649 more rows]

## Sheet: Downregulated proteins
Uniprot ID	Description	DMSO 1	MYC 1	DMSO 2	MYC 2	DMSO 3	MYC 3	log2_FC	adj.P.Val	Location	Type
[truncated: 482 more rows]

[truncated: 2 more sheets: Upregulated proteins, Multipass proteins]
