# Supplementary material for: The Mycobacterium ulcerans toxin mycolactone causes destructive Sec61-dependent loss of the endothelial glycocalyx and vessel basement membrane to drive skin necrosis
Source: eLife. 2025 Feb 6;12:RP86931. doi: 10.7554/eLife.86931 (PMC11801798; doi:10.7554/eLife.86931)
Supplement: Figure 4—source data 1. — Data were generated as described in the respective legend of Figure 4. [file elife-86931-fig4-data1.xlsx]

## Sheet: Figure 4E
Figure 4E		MFI (% of control - untreated)
	with ABC	DMSO	Myco
Rep1	24.6	94	-7.9
Rep2	31.2	102.3	8.1
Rep3	40.83	96.59	14.46
p=	0.0003		<0.0001

## Sheet: Figure 4F
Figure 4F		MFI (% of control - untreated)
	wo HepIII	DMSO	Myco
Rep1	3.3	112.6	28.5
Rep2	1.3	117.3	9.9
Rep3	1.14	85.88	3.94
p=	0.0004		0.0006
