# Supplementary material for: The Mycobacterium ulcerans toxin mycolactone causes destructive Sec61-dependent loss of the endothelial glycocalyx and vessel basement membrane to drive skin necrosis
Source: eLife. 2025 Feb 6;12:RP86931. doi: 10.7554/eLife.86931 (PMC11801798; doi:10.7554/eLife.86931)
Supplement: Figure 5—source data 1. — Data were generated as described in the respective legend of Figure 5. [file elife-86931-fig5-data1.xlsx]

## Sheet: Figure 5A
Figure 5A		Fluorescence intensity of individual cells
	Ctrl	DMSO	Myco 6h	Myco 12h
	1.01733	0.2	1.927	0.192
	0.35237	0.622	2.381	0.469
	0.761084	0.408	2.01	0.611
	0.160989	2.67	0.489	0.426
	1.93482	1.149	0.51	0.269
	0.707949	0.398	0.475	1.067
	0.750376	0.611	1.718	0.457
	0.426086	1.379	0.364	0.12
	0.381226	2.006	0.125	0.478
	0.968072	0.614	1.142	0.84
	1.96565	0.68	0.717	0.083
	1.46049	1.796	0.336	0.388
	1.33728	0.581	1.298	0.629
	1.6767	0.231	1.242	0.235
	1.43584	0.342	0.666	0.388
	0.699242	2.351	0.609	0.128
	0.778452	0.828	0.555	0.382
	0.372291	0.175	1.756	0.142
	0.1943	0.286	0.258	0.352
	0.63403	1.838	0.724	0.473
	1.8325	0.172	0.93	0.486
	0.134461	1.386	0.263	0.225
	0.257135	1.672	1.859	0.456
	0.813134	1.704	2.085	0.494
	0.505052	0.962	1.689	0.108
	0.09634	0.342	0.28	0.055
	0.153833	0.58	1.562	0.323
	2.58591	1.43959	0.258	0.122
	0.184776	1.08343	0.234	0.055
	0.329092	0.579379	0.232	0.101
	0.436909	1.6295	1.019	0.247
	1.29023	1.50128	0.158	0.658
	0.844175	0.703158	1.468	0.364
	0.717835	1.04496	0.078	0.877545
	0.738752	1.38514	1.556	1.00961
	0.946207	1.33342	0.348	0.839708
	0.323931	1.29133	0.635	0.438675
	0.741437	0.722268	1.726	1.12163
	1.36643	1.14487	0.447	0.523839
	0.468239	1.16036	1.21	0.356212
	1.93287	0.650782	1.38	0.64645
	0.655373	0.416318	0.91	0.298336
	2.77434	0.505309	0.71	0.366511
	0.719089	0.67753	0.4	0.169235
	0.906816	0.712085	1.34	0.958492
	1.22396	0.491277	1.2	0.17124
	0.369708	0.208995	1.36	0.288101
	0.84458	2.57952	1.69	0.303946
	0.249757	0.68424	1.38	0.112471
	1.40559	1.25931	0.87	0.112702
	2.07597	0.69393	0.77	0.472787
	1.22475	2.45466	1.74	0.078947
	0.390439	1.75614	0.89	0.468937
	0.47588	1.5819	0.6	0.087483
	1.12556	0.459303	0.52	0.37835
	0.608787	1.31605	0.39	0.035611
	0.780741	0.474902	0.74	0.374104
	0.83529	2.30317	0.47	0.191753
	0.542194	0.658413	0.3	0.425271
	1.58244	0.77663	0.99	0.313132
	0.934995	0.41935	0.94	0.158917
	0.384499	0.346534	1.54	0.143675
	0.339867	0.59531	1.66	0.192426
	1.66469	0.927615	2.26	0.782196
	0.614815	2.07684	2.16	0.070808
	0.40556	0.748462	1.62	0.137818
	0.80958	1.19388	1.66	0.086067
	2.27848	1.14034	1.13	0.291346
	0.60917	2.29451	1.79	0.369084
	1.77804	1.9869	0.57	0.246846
	1.12441	1.9869	1.06	0.591794
	1.84799	0.632294	1.14
	1.04324	1.69644	2.71
	0.655053	0.359834	0.69
	1.75321	0.376725	1.28
	0.454197	1.50653	2.51
	0.620441	0.524712	1.29
	0.717856		0.472229
	1.39286		0.854432
	0.355572		0.64305
	0.571663		0.906531
	2.0265		0.233146
	0.412715		0.562638
	0.299175		0.42115
	1.48408		2.01256
	1.89509		0.280331
	2.67756		0.185245
	0.432073		0.303259
	0.325642		0.371182
	2.40921		0.331418
	0.313889		0.093267
	0.328674		0.403155
	0.942199		0.84671
	0.753098		0.314192
	0.413513		0.32541
	0.362867		0.177151
			0.410378
			0.298366
			0.253348
			0.149934
			0.338417
			0.748686
			0.136157
			0.295046
			2.1576
			0.774306
			0.572507
			0.446656
			0.2124
			1.04419
			0.048642
	Ctrl	DMSO	Myco 6h	Myco 12h
p=		0.409	0.2194	<0.0001

## Sheet: Figure 5B
Figure 5B		Fluorescence intensity of individual cells
	si-ctrl	si-B3Galt6 #1	si-B3Galt6 #2
	0.753	0.743	1.113
	0.344	1.001	0.239
	0.383	0.69	0.489
	0.507	0.511	0.246
	1.435	0.579	0.863
	0.897	1.131	0.149
	0.219	0.416	0.139
	0.24	0.308	0.139
	1.915	0.212	0.375
	0.29	0.391	0.807
	0.327	0.106	0.258
	0.254	0.896	0.273
	0.572	0.302	0.168
	1.381	0.873	0.145
	1.151	0.292	0.346
	0.374	0.274	0.122
	0.306	0.23	0.102
	0.394	0.473	0.233
	0.237	0.12	0.195
	0.554	0.166	0.424
	1.472	0.204	0.049
	0.961	0.527	0.113
	0.899	0.355	0.034
	0.362	0.293	0.002
	0.588	0.47	0.04
	2.222	0.59	0.002
	1.549	0.607	0.032
	1.205	0.268	0.041
	2.376	0.373	0.001
	0.904	0.975	0.003
	0.692	0.369	0.026
	1.224	1.062	0.045
	0.931	0.272	0.001
	0.695	0.641	0.007
	1.779	0.19	0.011
	2.266	0.28	0.009
	2.483	0.86	0.008
	1.142	0.318	0.012
	1.362	0.248	0.01
	1.481	0.801	0.025
	0.413		0.007
	0.414		0.22
	1.131		0.037
	1.711		0.019
	1.457		0.025
	0.872		0.011
	1.72		0.01
	1.446		0.003
	1.755		0.007
	0.924		0.001
	1.536		0.005
	1.153		0.006
	0.565		0.005
	1.434		0.021
	0.652		0.017
	0.525		0.084
	1.182		0.035
	0.484		0.019
	0.883		0.004
	0.391		0.004
	1.305		0.003
	0.922		0.002
			0
			0.021
			0.006
			0.007
			0.009
			0.009
			0.003
	si-ctrl	si-B3Galt6 #1	si-B3Galt6 #2
p=		<0.0001	<0.0001

## Sheet: Figure 5D
Figure 5D		length/width of individual cells
	mock	si-ctrl+DMSO	si-ctrl+Myco	si-B3Galt6 #1+DMSO	si-B3Galt6 #2+DMSO
	1.74	4.83	29.37	11.45	3.8
	2.87	3.12	2.48	12.36	4.53
	4.32	3.64	1.43	8.6	2.63
	3.2	2.92	1.84	10.41	5.42
	3.95	3.32	8.38	18.07	1.46
	2.47	4	2.92	22.04	3.37
	1.26	3.97	4.54	24.37	2.03
	3.8	1.77	1.39	6.54	1.32
	2.07	1.62	2.19	10.94	4.77
	2.24	1.63	5.75	21.08	6.72
	2.83	3.75	5.48	12.52	2.55
	1.97	3.07	5.2	25.47	1.84
	2.14	5.4	1.31	5.3	3.93
	1.56	4.21	2.61	6.6	4.48
	2.06	2.56	2.47	10.37	1.86
	1.39	1.03	3.28	15.48	1.24
	2.25	1.34	2.08	8.29	2.86
	1.86	1.61	13.71	2.36	1.71
	3.17	1.06	2.13	2.33	3.08
	2.13	1.32	6.78	1.91	2.25
	1.36	1.52	2.56	1.18	4.22
	4.42	1.81	3.42	4.36	1.9
	3.55	1.75	1.66	7.19	2.12
	1.65	2.56	7.47	1.13	3.55
	2.84	2.06	8.88	3.95	3.33
	1.2	1.47	4.12	6.14	4.85
	1.63	2.02	3.28	5.99	3.11
	3.21	2.34	10.15	2.26	2.65
	3.62	1.22	7.24	3.8	4.97
	1.36	3.4	8.65	2.46	3.2
	1.93	2.55	8.96	1.71	3.44
	2.62	2.93	7.42	8.98	10.96
	2.13	2.64	12.43	2.99	9.35
	1.67	1.81	2.97	1.86	6.73
	2.99	4.41	4	7.95	2.5
	2.32	2.5	2.2	3.99	5.93
	2.85	2.49	7.33	8.4	6.75
	3.3	3.44	8.41	19.32	4.08
	3.69	3.91	11.67	15.66	4.39
	3.84	4.39	8.95	17.34	4.06
	2.56	4.99	12.32	15.93	4.43
	2.09	1.76	8.81	19.48	4.09
	1.85	3.05	2.46	10.62	4.52
	2.17	2.47	14.04	9.77	2.31
	2.32	3.72	2.93	6.31	5.2
	1.75	4.02	9.17	2.96	17.35
	1.37	2.82	5.13	14.69	1.68
	4.03	4.21	8.06	7.11	3.99
	2.86	3.34	5.41	6.18	4.47
	4.22	5.69	7.83	8.04	11.41
	2.18	4.85	4.25	9.48	4.8
	4.43	3.46	1.78	7.72	4.57
	3.86	2	9.55	14.1	2.22
	2.03	2.22	8.28	8	4.53
	2.1	2.06	12.21	14.22	3.96
	3.63	2.39	5.49	4.98	4.32
	3.76	2.62	4.35	6.64	10.38
	3.17	2.38	3.19	6.23	10.89
	1.88	2.77	4.46	5.28	5.77
	2.73	3.86	3.61	10.07	6.39
	4.88	1.99	12.31	2.96	20.47
	4.91	2.2	3.02	2.34	8.56
	3.09	3.87	2.33	2.53	3.01
	3.52	4.03	3.73	3.56	3.83
	3.25	4.96	5.44	3.87	5.58
	2.36	4.33	1.82	8.96	9.44
	2.54	2.46	3.87	4.51	4.67
	3.9	2.21	5.34	6.85	8.08
	2.19	3.57	8.68	7.51	6.33
	1.05	3.22	7.17	5.13	9.48
	1.65	3.14	2.52	1.98	7.38
	2.25	2.59	3.93	5.97	2.87
	3.41	2.51	5.03	2.83	1.28
	4.05	2.5	7.07	1.44	3.14
	2.63	2.62	5.88	6.25	5.14
	4.11	4.2	9.03	3.26	3.03
	2.14	5.21	2.66	6.73	1.86
	2.16	5.86	8.53	4.92	3.03
	2.84	2.93	7.98	9.91	2.71
	3.77	3.22	8.9	3.28	2.36
	2.47	2.62	3.69	13.83	3.58
	2.57	1.91	10.48	8.01	2.79
	4.32	1.6	8.1	4.87	1.9
	2.1	3.01	7.28	7.16	7.95
	4.08	4.67	5.34	2.51	13.69
	2.58	2.16	6.2	11.27	10.47
	2.09	2.63	12.21	10.13	10.33
	2.38	1.85	7.72	10.14	5.89
	1.76	3.84	7.71	12.84	11.25
	2.95	2.48	7.14	11.6	3.06
	2.83	1.96	10.29	12.67	10.5
	1.73	2.65	10.84	10.42	15.18
	3.61	1.87	9.5	11.22	12.91
	1.95	0.91	10.65	10.53	5.26
	3.42	3.16	3.94	8.18	8.57
	2.13	2.65	9.38	9.87	6.79
	4.04	1.8	8.56	10.39	9.14
	3.78	3.97	3.64	7.54	7.2
	5.08	3.87	6.7	12.23	4.43
	3.7	3.66	6.78	7.49	3.35
	0.82	2.24	10.07	9.71	6.79
	4	2.16	5.67	9.66	5.16
	3.62	2.91	1.38	7.51	3.65
	4.66		4.76	22.02	3.78
	2.23		4.4	6.58	6.48
	3.95		4.24	4.6	2.39
	2.79		2.39	7.59	14.06
			3.93	3.13	5.23
			4.41	1.82	4.39
			6.27	2	5.41
				2.26
				2.24
				4.45
				3.91
				3.96
				2.16
				3.25
				8
	mock	si-ctrl+DMSO	si-ctrl+MYC	si-B3Galt6 #1+DMSO	si-B3Galt6 #2+DMSO
p=	0.9968		<0.0001	<0.0001	<0.0001

## Sheet: Figure 5E
Figure 5E		Rounded cells (% of total)
		mock	si-ctrl+DMSO	si-ctrl+Myco	si-B3Galt6 #1+DMSO	si-B3Galt6 #2+DMSO
	Rep1	2.45	2.1	25	4.391	2.582
	Rep2	5.015	3.019	18.6	4.715	5.217
	Rep3	2.036	2.622	16.5	2.144	2.196
	p=	0.9909		<0.0001	0.9061	0.9778

## Sheet: Figure 5F
Figure 5F		Relative fluorescence intensity
		mock
		DMSO	Myco	IL-1β	si-Ctrl+DMSO	si-B3Galt6 #1+DMSO	si-B3Galt6 #2+DMSO
	Rep1	2.04	37.8	24	5.43	18.81	14.78
	Rep2	-1.9	14.48	14.4	2.96	5.33	17.94
	Rep3	0.2	17.1	25.5	2.8	6.1	13.7
	p=		0.0248	0.0347				vs DMSO mock infection
	p=					0.237	0.0367	vs si-Ctrl+DMSO

## Sheet: Figure 5G
Figure 5G		Migration time (hours)
		Ctrl	si-ctrl	si-B3Galt6 #1	si-B3Galt6 #2	si-ctrl+Myco
		9.3	9.8	7.4	8.5	30
		7.47	14.7	7.8	8.8	30
		8	11.5	6.6	4.5	30
	p=	0.0582		0.0192	0.0192	<0.0001
