# Supplementary material for: The Mycobacterium ulcerans toxin mycolactone causes destructive Sec61-dependent loss of the endothelial glycocalyx and vessel basement membrane to drive skin necrosis
Source: eLife. 2025 Feb 6;12:RP86931. doi: 10.7554/eLife.86931 (PMC11801798; doi:10.7554/eLife.86931)
Supplement: Figure 6—source data 1. — Data were generated as described in the respective legend of Figure 6. [file elife-86931-fig6-data1.xlsx]

## Sheet: Figure 6B
Figure 6B		MFI (% of control - untreated)
	HSPG2		Isotype	DMSO	Myco
		Rep1	20	98.6	10.3
		Rep2	20	95.3	2.8
		Rep3	20	125.5	19.3
		p=			0.0003
	GPC1		Isotype	DMSO	Myco
		Rep1	30	109.6	25.5
		Rep2	30	101.6	15.2
		Rep3	30	91.4	45.7
		p=			0.003
	BGN		Isotype	DMSO	Myco
		Rep1	10	105.61	32.8
		Rep2	10	82.69	41.75
		Rep3	10	111	56.3
		p=			0.0043
