# Supplementary material for: The Mycobacterium ulcerans toxin mycolactone causes destructive Sec61-dependent loss of the endothelial glycocalyx and vessel basement membrane to drive skin necrosis
Source: eLife. 2025 Feb 6;12:RP86931. doi: 10.7554/eLife.86931 (PMC11801798; doi:10.7554/eLife.86931)
Supplement: Figure 7—source data 1. — Data were generated as described in the respective legend of Figure 7. [file elife-86931-fig7-data1.xlsx]

## Sheet: Figure 7C
Figure 7C		MFI (% of control)
		DMSO			Myco
		Rep1	Rep2	Rep3	Rep1	Rep2	Rep3	p=
	ITGB1	89.8	74.8	102.21	56.9	36	42.2	0.0515
	ITGB4	117.1	91.9	130.5	28.8	13.3	39.9	0.0028
	LAMA5	78.6	81.8	93.9	8	12.8	26.1	0.0002
