# Supplementary material for: The Mycobacterium ulcerans toxin mycolactone causes destructive Sec61-dependent loss of the endothelial glycocalyx and vessel basement membrane to drive skin necrosis
Source: eLife. 2025 Feb 6;12:RP86931. doi: 10.7554/eLife.86931 (PMC11801798; doi:10.7554/eLife.86931)
Supplement: Figure 8—source data 1. — Data were generated as described in the respective legend of Figure 8. [file elife-86931-fig8-data1.xlsx]

## Sheet: Figure 8A
Figure 8A		Re-attached cells per field
		Ctrl			DMSO			Myco
		Rep1	Rep2	Rep3	Rep1	Rep2	Rep3	Rep1	Rep2	Rep3
	uncoated	8	12	10.3	7	16	9.3	8	0	6
	111	43	69.3	21	55	98	22	6	7	1
	411	53	97	30.7	47	101.3	56.3	15	14.7	2
	511	148	143.7	86.3	119	174	95.3	116	104	135
		p=	Ctrl vs. DMSO		Ctrl vs. Myco		DMSO vs. Myco
		uncoated	0.9983		0.8923		0.8665
		111	0.4927		0.0149		0.0019
		411	0.7848		0.0034		0.0011
		511	0.9552		0.7987		0.6305
		p=	Ctrl	DMSO	Myco
	uncoated vs. 111		0.0575	0.0083	>0.9999
	uncoated vs. 411		0.0057	0.002	0.9584
	uncoated vs. 511		<0.0001	<0.0001	<0.0001
	111 vs. 411		0.5634	0.8394	0.9584
	111 vs. 511		<0.0001	0.0003	<0.0001
	411 vs. 511		0.0006	0.0012	<0.0001

## Sheet: Figure 8B and supplement
Figure 8B and supplement			Rounded cells %
		DMSO			uncoated+Myco			Lam-511+Myco			Lam-411+Myco			Lam-111+Myco
		Rep1	Rep2	Rep3	Rep1	Rep2	Rep3	Rep1	Rep2	Rep3	Rep1	Rep2	Rep3	Rep1	Rep2	Rep3
	0 h	0	1.98	1.83	0	1.94	1.77	0	0.9	3.09	1.4	6.2	2.16	0	2.93	2.31
	24 h	0.5	2.16	2.16	5.5	3.15	2.4	1.8	2.61	5.98	4.3	7.86	7.24	3.3	4.32	6.4
	36 h	1.6	1.7	2.07	10	8.7	5.52	4.1	4.46	7.69	12.2	14.47	10.13	7.2	8.28	6.72
	48 h	3	0.53	0.53	19.1	18.8	14.81	4.6	8.93	9.45	18	24.16	19.73	10.7	17.12	17.91
				p=	0 h	24 h	36 h	48 h
	uncoated+Myco vs. DMSO				>0.9999	0.3315	0.0892	0.0038
	uncoated+Myco vs. Lam-511+Myco				>0.9999	0.9996	0.4618	0.0244
	uncoated+Myco vs. Lam-411+Myco				0.6116	0.3052	0.2091	0.5524
	uncoated+Myco vs. Lam-111+Myco				0.9644	0.857	0.9597	0.8
				p=	0 h	24 h	36 h	48 h
	uncoated+Myco vs. DMSO				0.999	0.229	0.0628	0.0024
	uncoated+Myco vs. Lam-511+Myco				0.9948	0.986	0.3237	0.0153

## Sheet: Figure 8C and supplement
Figure 8C and supplement			Relative attached cells (vs. 0h)
		DMSO			uncoated+Myco			Lam-511+Myco			Lam-411+Myco			Lam-111+Myco
		Rep1	Rep2	Rep3	Rep1	Rep2	Rep3	Rep1	Rep2	Rep3	Rep1	Rep2	Rep3	Rep1	Rep2	Rep3
	0 h	1	1	1	1	1	1	1	1	1	1	1	1	1	1	1
	24 h	1.55	1.4	1.3	1.2	1.2	1.1	1.23	1.4	1.2	1.25	1.2	1	1.4	1.3	0.9
	36 h	1.57	1.7	1.8	1.07	1.3	1.2	1.2	1.4	1.1	1.12	1.3	1	1.43	1.6	1
	48 h	1.86	1.9	1.7	0.98	0.9	0.8	1.39	1.4	1.2	1.06	1.1	0.9	1.2	1.2	0.9
				p=	0 h	24 h	36 h	48 h
	uncoated+Myco vs. DMSO				ND	0.1356	0.0166	0.001
	uncoated+Myco vs. Lam-511+Myco				ND	0.4644	0.9806	0.0196
	uncoated+Myco vs. Lam-411+Myco				ND	0.9982	0.9679	0.4346
	uncoated+Myco vs. Lam-111+Myco				ND	0.9975	0.8341	0.3657
				p=	0 h	24 h	36 h	48 h
	uncoated+Myco vs. DMSO				ND	0.0916	0.0104	0.0006
	uncoated+Myco vs. Lam-511+Myco				ND	0.3324	0.8976	0.0123

## Sheet: Figure 8D
Figure 8D		Migrating cells/um2
		DMSO			Myco			511+Myco
		Rep1	Rep2	Rep3	Rep1	Rep2	Rep3	Rep1	Rep2	Rep3
	8 h	42.9	41.6	37.5	21.9	20.8	27.9	44.8	25.9	32
	16 h	63.2	68.8	63	24.8	30.8	40.3	64.5	54.9	51.2
		p=	8 h	16 h
	DMSO vs. Myco		0.0146	<0.0001
	DMSO vs. 511+Myco		0.4429	0.286
	Myco vs. 511+Myco		0.1325	0.001
