# Supplementary figures and images for: The Mycobacterium ulcerans toxin mycolactone causes destructive Sec61-dependent loss of the endothelial glycocalyx and vessel basement membrane to drive skin necrosis
Source: eLife journal article supplement (doi:10.7554/elife.86931), 2023-05-15

## FIBRONECTIN

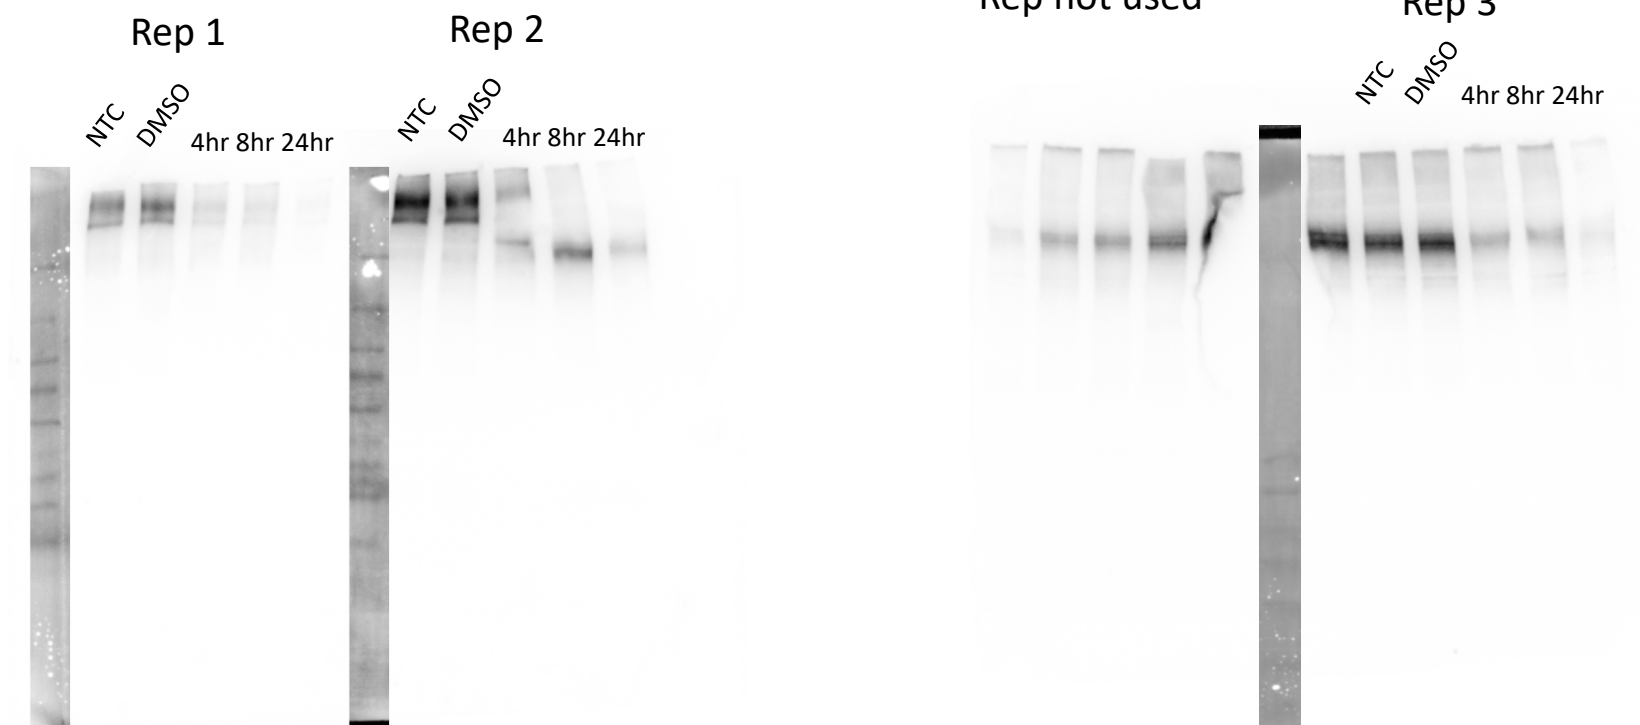

GAPDH

Rep 1

Rep 2

Rep not used

Rep 3

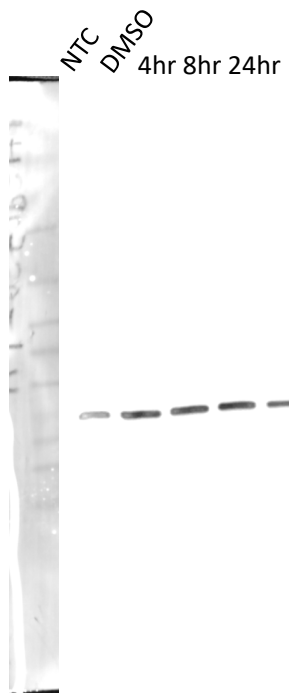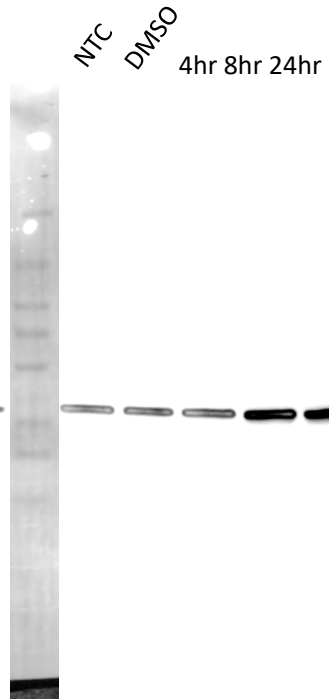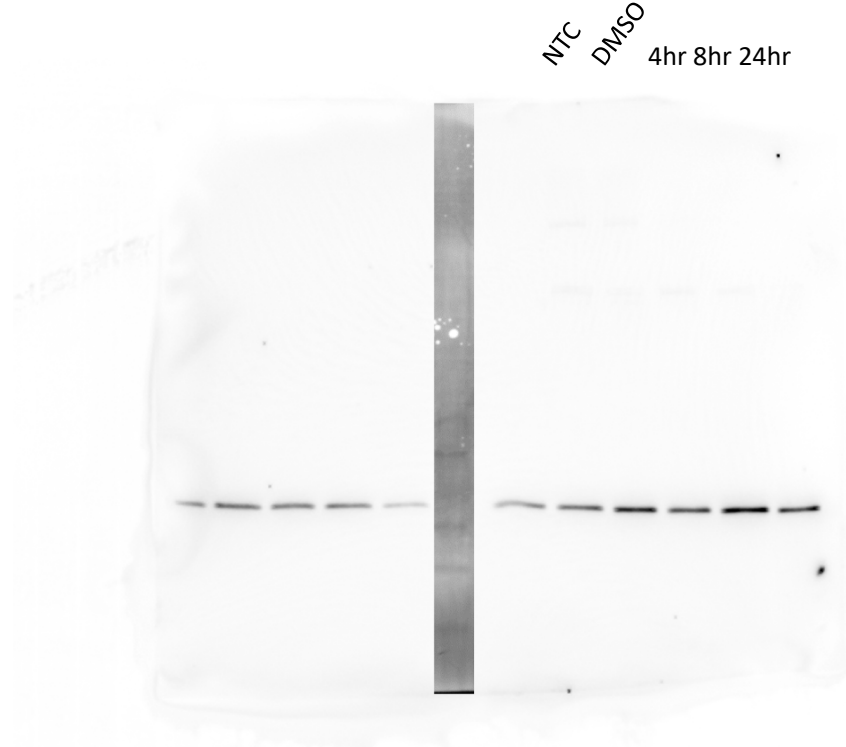

Supplement: fig7-data2 [file elife-86931-fig7-data2-v1.zip]

ITGA5

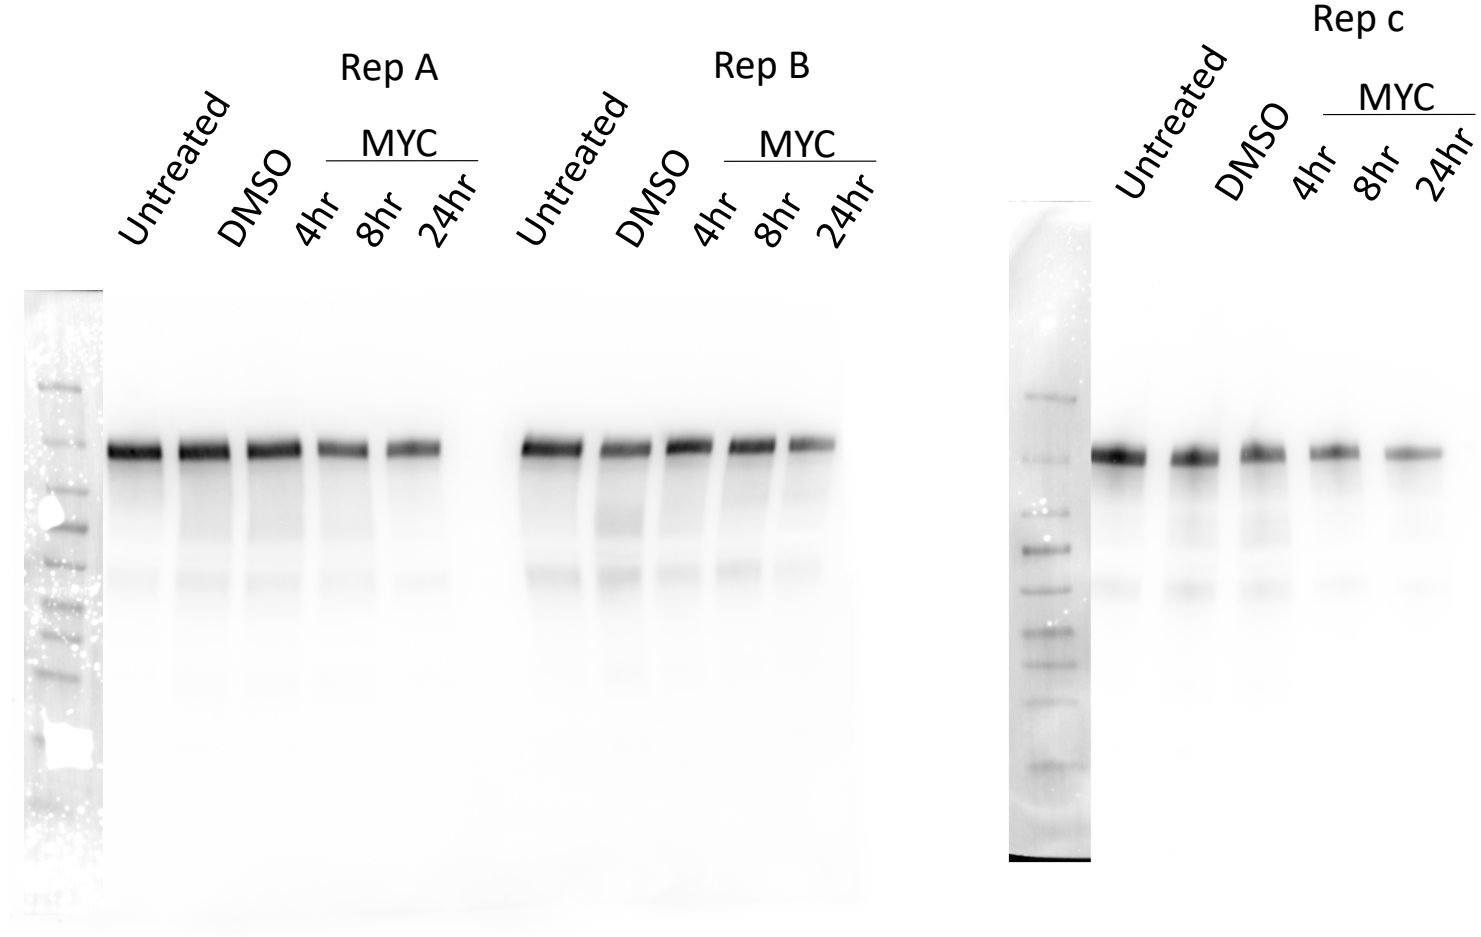

GAPDH

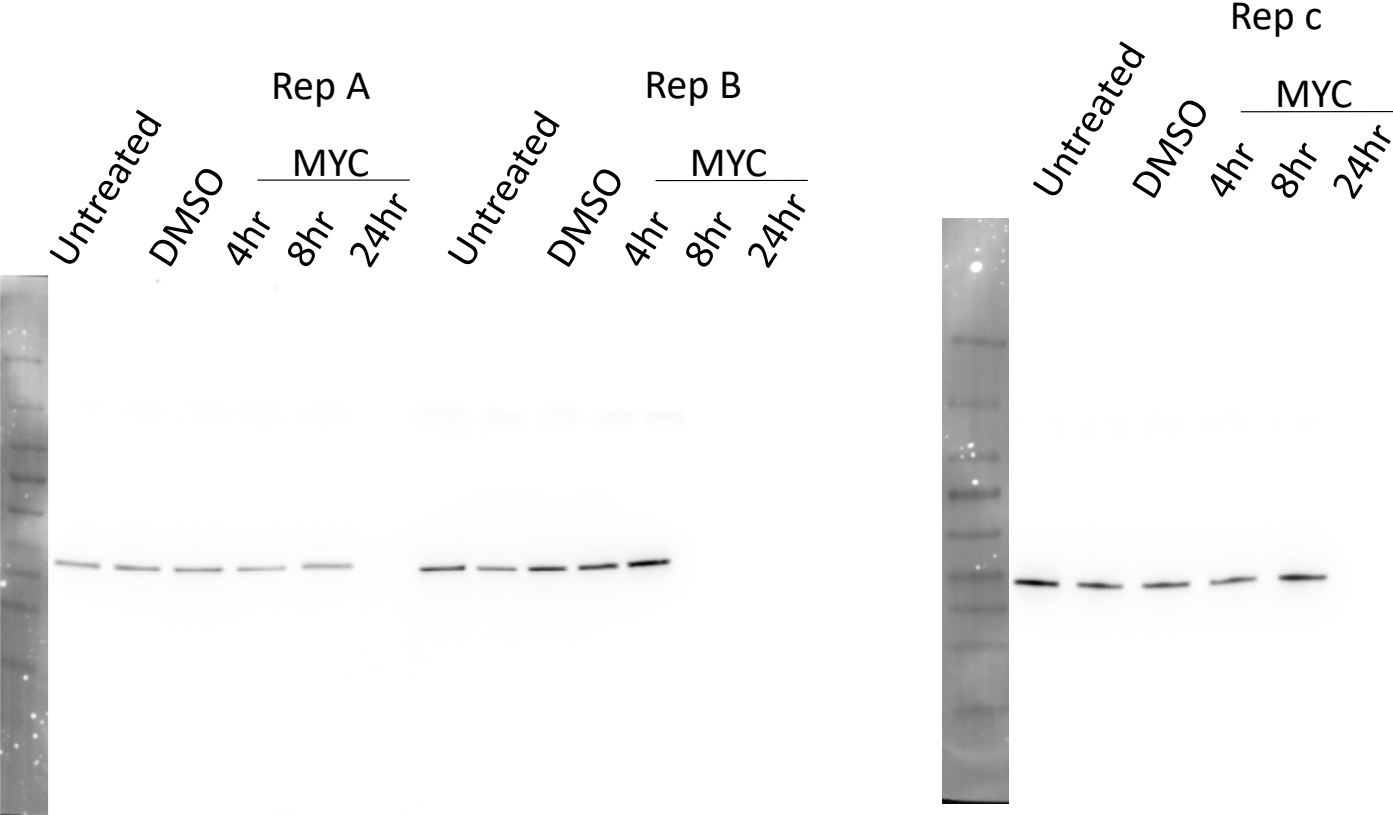

Supplement: fig7-data4 [file elife-86931-fig7-data4-v1.zip]
